# Supplementary material for: Diverse viral proteases activate the NLRP1 inflammasome
Source: bioRxiv preprint, doi:10.1101/2020.10.16.343426, version 1 (2020-10-17)
Supplement: Supplemental File 3 [file 343426_file04.xlsx]

## Sheet: S3A. True positives
Supplemental File 3A. Un-optimized 3C cleavage motif scores for True Positive hits within enteroviral polyprotein dataset
MatchType	sequence_name	start_pos	stop_pos	p-value	log10_p-val	matched_sequence
TruePositive	ARC95292	1410	1417	6.92e-09	-8.15989	ALFQGPPT
TruePositive	ARC95293	1410	1417	6.92e-09	-8.15989	ALFQGPPT
TruePositive	AVJ35777	1413	1420	6.92e-09	-8.15989	ALFQGPPT
TruePositive	YP_009246449	1435	1442	6.92e-09	-8.15989	ALFQGPPT
TruePositive	NP_040760	1440	1447	6.92e-09	-8.15989	ALFQGPPT
TruePositive	ABA43708	1440	1447	6.92e-09	-8.15989	ALFQGPPT
TruePositive	BAA18891	1440	1447	6.92e-09	-8.15989	ALFQGPPT
TruePositive	NP_040760	1440	1447	6.92e-09	-8.15989	ALFQGPPT
TruePositive	AUF49658	1442	1449	6.92e-09	-8.15989	ALFQGPPT
TruePositive	ARC95293	1633	1640	6.92e-09	-8.15989	ALFQGPPT
TruePositive	ARC95292	1633	1640	6.92e-09	-8.15989	ALFQGPPT
TruePositive	ARM53611	1607	1614	7.32e-09	-8.13549	AEFQGPPT
TruePositive	AMD82094	1411	1418	7.71e-09	-8.11295	ALFQGPPQ
TruePositive	AEE01039	1411	1418	7.71e-09	-8.11295	ALFQGPPQ
TruePositive	YP_009353025	1414	1421	7.71e-09	-8.11295	ALFQGPPQ
TruePositive	ANJ61547	1433	1440	7.71e-09	-8.11295	ALFQGPPQ
TruePositive	QEG13930	1433	1440	7.71e-09	-8.11295	ALFQGPPQ
TruePositive	ANJ61582	1433	1440	7.71e-09	-8.11295	ALFQGPPQ
TruePositive	ANJ61548	1433	1440	7.71e-09	-8.11295	ALFQGPPQ
TruePositive	QEG13944	1433	1440	7.71e-09	-8.11295	ALFQGPPQ
TruePositive	ANJ61568	1433	1440	7.71e-09	-8.11295	ALFQGPPQ
TruePositive	ANJ61550	1433	1440	7.71e-09	-8.11295	ALFQGPPQ
TruePositive	QEG13923	1433	1440	7.71e-09	-8.11295	ALFQGPPQ
TruePositive	ANJ61567	1433	1440	7.71e-09	-8.11295	ALFQGPPQ
TruePositive	AIT52325	1433	1440	7.71e-09	-8.11295	ALFQGPPQ
TruePositive	BAW35374	1433	1440	7.71e-09	-8.11295	ALFQGPPQ
TruePositive	ANJ61595	1433	1440	7.71e-09	-8.11295	ALFQGPPQ
TruePositive	QEG13924	1433	1440	7.71e-09	-8.11295	ALFQGPPQ
TruePositive	BAW35377	1433	1440	7.71e-09	-8.11295	ALFQGPPQ
TruePositive	QEG13945	1433	1440	7.71e-09	-8.11295	ALFQGPPQ
TruePositive	QEG13947	1433	1440	7.71e-09	-8.11295	ALFQGPPQ
TruePositive	ANJ61749	1433	1440	7.71e-09	-8.11295	ALFQGPPQ
TruePositive	ANJ61556	1433	1440	7.71e-09	-8.11295	ALFQGPPQ
TruePositive	QEG13941	1433	1440	7.71e-09	-8.11295	ALFQGPPQ
TruePositive	ANJ61563	1433	1440	7.71e-09	-8.11295	ALFQGPPQ
TruePositive	ANJ61542	1433	1440	7.71e-09	-8.11295	ALFQGPPQ
TruePositive	AGC00381	1433	1440	7.71e-09	-8.11295	ALFQGPPQ
TruePositive	QEG13935	1433	1440	7.71e-09	-8.11295	ALFQGPPQ
TruePositive	QEG13948	1433	1440	7.71e-09	-8.11295	ALFQGPPQ
TruePositive	AKU75647	1433	1440	7.71e-09	-8.11295	ALFQGPPQ
TruePositive	QEG13932	1433	1440	7.71e-09	-8.11295	ALFQGPPQ
TruePositive	ANJ61561	1433	1440	7.71e-09	-8.11295	ALFQGPPQ
TruePositive	QEG13928	1433	1440	7.71e-09	-8.11295	ALFQGPPQ
TruePositive	QEG13920	1433	1440	7.71e-09	-8.11295	ALFQGPPQ
TruePositive	BAW35376	1433	1440	7.71e-09	-8.11295	ALFQGPPQ
TruePositive	QEG13922	1433	1440	7.71e-09	-8.11295	ALFQGPPQ
TruePositive	ANJ61546	1433	1440	7.71e-09	-8.11295	ALFQGPPQ
TruePositive	ANJ61590	1433	1440	7.71e-09	-8.11295	ALFQGPPQ
TruePositive	AFM73548	1433	1440	7.71e-09	-8.11295	ALFQGPPQ
TruePositive	ANJ61729	1433	1440	7.71e-09	-8.11295	ALFQGPPQ
TruePositive	BAW35375	1433	1440	7.71e-09	-8.11295	ALFQGPPQ
TruePositive	QEG13921	1433	1440	7.71e-09	-8.11295	ALFQGPPQ
TruePositive	ANJ61578	1433	1440	7.71e-09	-8.11295	ALFQGPPQ
TruePositive	QEG13934	1433	1440	7.71e-09	-8.11295	ALFQGPPQ
TruePositive	ANJ61545	1433	1440	7.71e-09	-8.11295	ALFQGPPQ
TruePositive	QEG13939	1433	1440	7.71e-09	-8.11295	ALFQGPPQ
TruePositive	BAW35418	1434	1441	7.71e-09	-8.11295	ALFQGPPQ
TruePositive	ALP31084	1434	1441	7.71e-09	-8.11295	ALFQGPPQ
TruePositive	ANJ61569	1434	1441	7.71e-09	-8.11295	ALFQGPPQ
TruePositive	ALP31081	1434	1441	7.71e-09	-8.11295	ALFQGPPQ
TruePositive	APU51950	1434	1441	7.71e-09	-8.11295	ALFQGPPQ
TruePositive	QEG13973	1434	1441	7.71e-09	-8.11295	ALFQGPPQ
TruePositive	ANJ61570	1434	1441	7.71e-09	-8.11295	ALFQGPPQ
TruePositive	ANN46849	1434	1441	7.71e-09	-8.11295	ALFQGPPQ
TruePositive	AJI76561	1434	1441	7.71e-09	-8.11295	ALFQGPPQ
TruePositive	ALP31141	1434	1441	7.71e-09	-8.11295	ALFQGPPQ
TruePositive	AKU75611	1434	1441	7.71e-09	-8.11295	ALFQGPPQ
TruePositive	ANJ61739	1434	1441	7.71e-09	-8.11295	ALFQGPPQ
TruePositive	ANQ69418	1434	1441	7.71e-09	-8.11295	ALFQGPPQ
TruePositive	AOF41445	1434	1441	7.71e-09	-8.11295	ALFQGPPQ
TruePositive	AKQ44195	1434	1441	7.71e-09	-8.11295	ALFQGPPQ
TruePositive	ANN46860	1434	1441	7.71e-09	-8.11295	ALFQGPPQ
TruePositive	QEG13964	1434	1441	7.71e-09	-8.11295	ALFQGPPQ
TruePositive	AKU75638	1434	1441	7.71e-09	-8.11295	ALFQGPPQ
TruePositive	QEU45799	1434	1441	7.71e-09	-8.11295	ALFQGPPQ
TruePositive	AKU75609	1434	1441	7.71e-09	-8.11295	ALFQGPPQ
TruePositive	ALP31088	1434	1441	7.71e-09	-8.11295	ALFQGPPQ
TruePositive	AKU75619	1434	1441	7.71e-09	-8.11295	ALFQGPPQ
TruePositive	QEG13936	1434	1441	7.71e-09	-8.11295	ALFQGPPQ
TruePositive	ANJ61540	1434	1441	7.71e-09	-8.11295	ALFQGPPQ
TruePositive	AKU75621	1434	1441	7.71e-09	-8.11295	ALFQGPPQ
TruePositive	QEU45795	1434	1441	7.71e-09	-8.11295	ALFQGPPQ
TruePositive	ANJ61541	1434	1441	7.71e-09	-8.11295	ALFQGPPQ
TruePositive	ALP31155	1434	1441	7.71e-09	-8.11295	ALFQGPPQ
TruePositive	BAK08577	1434	1441	7.71e-09	-8.11295	ALFQGPPQ
TruePositive	QEJ82272	1434	1441	7.71e-09	-8.11295	ALFQGPPQ
TruePositive	AWW21303	1434	1441	7.71e-09	-8.11295	ALFQGPPQ
TruePositive	ANJ61732	1434	1441	7.71e-09	-8.11295	ALFQGPPQ
TruePositive	ALP31159	1434	1441	7.71e-09	-8.11295	ALFQGPPQ
TruePositive	AKU75612	1434	1441	7.71e-09	-8.11295	ALFQGPPQ
TruePositive	ALP31132	1434	1441	7.71e-09	-8.11295	ALFQGPPQ
TruePositive	ALP31098	1434	1441	7.71e-09	-8.11295	ALFQGPPQ
TruePositive	ANJ61587	1434	1441	7.71e-09	-8.11295	ALFQGPPQ
TruePositive	ALP31097	1434	1441	7.71e-09	-8.11295	ALFQGPPQ
TruePositive	AWW21300	1434	1441	7.71e-09	-8.11295	ALFQGPPQ
TruePositive	ANN46830	1434	1441	7.71e-09	-8.11295	ALFQGPPQ
TruePositive	AKU75610	1434	1441	7.71e-09	-8.11295	ALFQGPPQ
TruePositive	QEG13988	1434	1441	7.71e-09	-8.11295	ALFQGPPQ
TruePositive	QEJ82275	1434	1441	7.71e-09	-8.11295	ALFQGPPQ
TruePositive	ALP31143	1434	1441	7.71e-09	-8.11295	ALFQGPPQ
TruePositive	QEG13956	1434	1441	7.71e-09	-8.11295	ALFQGPPQ
TruePositive	AKU75622	1434	1441	7.71e-09	-8.11295	ALFQGPPQ
TruePositive	AKU75641	1434	1441	7.71e-09	-8.11295	ALFQGPPQ
TruePositive	ALP31161	1434	1441	7.71e-09	-8.11295	ALFQGPPQ
TruePositive	QEG13994	1434	1441	7.71e-09	-8.11295	ALFQGPPQ
TruePositive	AKU75632	1434	1441	7.71e-09	-8.11295	ALFQGPPQ
TruePositive	ALP31176	1434	1441	7.71e-09	-8.11295	ALFQGPPQ
TruePositive	ALP31172	1434	1441	7.71e-09	-8.11295	ALFQGPPQ
TruePositive	ALP31128	1434	1441	7.71e-09	-8.11295	ALFQGPPQ
TruePositive	AKU75600	1434	1441	7.71e-09	-8.11295	ALFQGPPQ
TruePositive	ANN46834	1434	1441	7.71e-09	-8.11295	ALFQGPPQ
TruePositive	ALP31140	1434	1441	7.71e-09	-8.11295	ALFQGPPQ
TruePositive	QCE20694	1434	1441	7.71e-09	-8.11295	ALFQGPPQ
TruePositive	ALP31137	1434	1441	7.71e-09	-8.11295	ALFQGPPQ
TruePositive	ALP31122	1434	1441	7.71e-09	-8.11295	ALFQGPPQ
TruePositive	ALP31138	1434	1441	7.71e-09	-8.11295	ALFQGPPQ
TruePositive	AKU75592	1434	1441	7.71e-09	-8.11295	ALFQGPPQ
TruePositive	ALP31111	1434	1441	7.71e-09	-8.11295	ALFQGPPQ
TruePositive	AOV86542	1434	1441	7.71e-09	-8.11295	ALFQGPPQ
TruePositive	AWW21311	1434	1441	7.71e-09	-8.11295	ALFQGPPQ
TruePositive	APU51949	1434	1441	7.71e-09	-8.11295	ALFQGPPQ
TruePositive	AKU75639	1434	1441	7.71e-09	-8.11295	ALFQGPPQ
TruePositive	AWW21306	1434	1441	7.71e-09	-8.11295	ALFQGPPQ
TruePositive	ANJ61564	1434	1441	7.71e-09	-8.11295	ALFQGPPQ
TruePositive	QCE20698	1434	1441	7.71e-09	-8.11295	ALFQGPPQ
TruePositive	QEG13926	1434	1441	7.71e-09	-8.11295	ALFQGPPQ
TruePositive	ANJ61579	1434	1441	7.71e-09	-8.11295	ALFQGPPQ
TruePositive	AOF41451	1434	1441	7.71e-09	-8.11295	ALFQGPPQ
TruePositive	ANJ61724	1434	1441	7.71e-09	-8.11295	ALFQGPPQ
TruePositive	AOF41442	1434	1441	7.71e-09	-8.11295	ALFQGPPQ
TruePositive	AYW17089	1434	1441	7.71e-09	-8.11295	ALFQGPPQ
TruePositive	ANJ61733	1434	1441	7.71e-09	-8.11295	ALFQGPPQ
TruePositive	QCE20703	1434	1441	7.71e-09	-8.11295	ALFQGPPQ
TruePositive	ANJ61576	1434	1441	7.71e-09	-8.11295	ALFQGPPQ
TruePositive	ANJ61740	1434	1441	7.71e-09	-8.11295	ALFQGPPQ
TruePositive	AWW21310	1434	1441	7.71e-09	-8.11295	ALFQGPPQ
TruePositive	AKU75633	1434	1441	7.71e-09	-8.11295	ALFQGPPQ
TruePositive	ANJ61596	1434	1441	7.71e-09	-8.11295	ALFQGPPQ
TruePositive	QCE20691	1434	1441	7.71e-09	-8.11295	ALFQGPPQ
TruePositive	ANJ61598	1434	1441	7.71e-09	-8.11295	ALFQGPPQ
TruePositive	ALP31100	1434	1441	7.71e-09	-8.11295	ALFQGPPQ
TruePositive	ALP31130	1434	1441	7.71e-09	-8.11295	ALFQGPPQ
TruePositive	ANN46835	1434	1441	7.71e-09	-8.11295	ALFQGPPQ
TruePositive	QEG13927	1434	1441	7.71e-09	-8.11295	ALFQGPPQ
TruePositive	ANJ61726	1434	1441	7.71e-09	-8.11295	ALFQGPPQ
TruePositive	ANJ61574	1434	1441	7.71e-09	-8.11295	ALFQGPPQ
TruePositive	ALP31142	1434	1441	7.71e-09	-8.11295	ALFQGPPQ
TruePositive	AWW21298	1434	1441	7.71e-09	-8.11295	ALFQGPPQ
TruePositive	ANJ61725	1434	1441	7.71e-09	-8.11295	ALFQGPPQ
TruePositive	QEG13955	1434	1441	7.71e-09	-8.11295	ALFQGPPQ
TruePositive	AKT08827	1434	1441	7.71e-09	-8.11295	ALFQGPPQ
TruePositive	AKU75605	1434	1441	7.71e-09	-8.11295	ALFQGPPQ
TruePositive	ALP31114	1434	1441	7.71e-09	-8.11295	ALFQGPPQ
TruePositive	ANJ61571	1434	1441	7.71e-09	-8.11295	ALFQGPPQ
TruePositive	ALP31167	1434	1441	7.71e-09	-8.11295	ALFQGPPQ
TruePositive	AJI76571	1434	1441	7.71e-09	-8.11295	ALFQGPPQ
TruePositive	ANN46844	1434	1441	7.71e-09	-8.11295	ALFQGPPQ
TruePositive	QEJ82276	1434	1441	7.71e-09	-8.11295	ALFQGPPQ
TruePositive	AKU75636	1434	1441	7.71e-09	-8.11295	ALFQGPPQ
TruePositive	ANN46829	1434	1441	7.71e-09	-8.11295	ALFQGPPQ
TruePositive	QEG13954	1434	1441	7.71e-09	-8.11295	ALFQGPPQ
TruePositive	APP91862	1434	1441	7.71e-09	-8.11295	ALFQGPPQ
TruePositive	AYW17094	1434	1441	7.71e-09	-8.11295	ALFQGPPQ
TruePositive	APU51957	1434	1441	7.71e-09	-8.11295	ALFQGPPQ
TruePositive	QEJ82277	1434	1441	7.71e-09	-8.11295	ALFQGPPQ
TruePositive	AOV86536	1434	1441	7.71e-09	-8.11295	ALFQGPPQ
TruePositive	AKU75597	1434	1441	7.71e-09	-8.11295	ALFQGPPQ
TruePositive	ANN46845	1434	1441	7.71e-09	-8.11295	ALFQGPPQ
TruePositive	AKU75614	1434	1441	7.71e-09	-8.11295	ALFQGPPQ
TruePositive	ANN46847	1434	1441	7.71e-09	-8.11295	ALFQGPPQ
TruePositive	QEJ82273	1434	1441	7.71e-09	-8.11295	ALFQGPPQ
TruePositive	QCE20699	1434	1441	7.71e-09	-8.11295	ALFQGPPQ
TruePositive	AKU75613	1434	1441	7.71e-09	-8.11295	ALFQGPPQ
TruePositive	QEG13933	1434	1441	7.71e-09	-8.11295	ALFQGPPQ
TruePositive	AKU75635	1434	1441	7.71e-09	-8.11295	ALFQGPPQ
TruePositive	AKU75616	1434	1441	7.71e-09	-8.11295	ALFQGPPQ
TruePositive	ANN46837	1434	1441	7.71e-09	-8.11295	ALFQGPPQ
TruePositive	AKU75595	1434	1441	7.71e-09	-8.11295	ALFQGPPQ
TruePositive	AKT08834	1434	1441	7.71e-09	-8.11295	ALFQGPPQ
TruePositive	QEG13949	1434	1441	7.71e-09	-8.11295	ALFQGPPQ
TruePositive	ANJ61551	1434	1441	7.71e-09	-8.11295	ALFQGPPQ
TruePositive	ANJ61558	1434	1441	7.71e-09	-8.11295	ALFQGPPQ
TruePositive	QBA90622	1434	1441	7.71e-09	-8.11295	ALFQGPPQ
TruePositive	QEG13950	1434	1441	7.71e-09	-8.11295	ALFQGPPQ
TruePositive	ALP31158	1434	1441	7.71e-09	-8.11295	ALFQGPPQ
TruePositive	ALP31134	1434	1441	7.71e-09	-8.11295	ALFQGPPQ
TruePositive	ANZ79243	1434	1441	7.71e-09	-8.11295	ALFQGPPQ
TruePositive	AKU75629	1434	1441	7.71e-09	-8.11295	ALFQGPPQ
TruePositive	ANN46840	1434	1441	7.71e-09	-8.11295	ALFQGPPQ
TruePositive	ALP31166	1434	1441	7.71e-09	-8.11295	ALFQGPPQ
TruePositive	ALP31103	1434	1441	7.71e-09	-8.11295	ALFQGPPQ
TruePositive	AKU75596	1434	1441	7.71e-09	-8.11295	ALFQGPPQ
TruePositive	AWW21299	1434	1441	7.71e-09	-8.11295	ALFQGPPQ
TruePositive	AKQ44188	1434	1441	7.71e-09	-8.11295	ALFQGPPQ
TruePositive	QCE20701	1434	1441	7.71e-09	-8.11295	ALFQGPPQ
TruePositive	ALP31116	1434	1441	7.71e-09	-8.11295	ALFQGPPQ
TruePositive	AZL49233	1434	1441	7.71e-09	-8.11295	ALFQGPPQ
TruePositive	ALP31082	1434	1441	7.71e-09	-8.11295	ALFQGPPQ
TruePositive	ALP31092	1434	1441	7.71e-09	-8.11295	ALFQGPPQ
TruePositive	ALP31153	1434	1441	7.71e-09	-8.11295	ALFQGPPQ
TruePositive	ANJ61721	1434	1441	7.71e-09	-8.11295	ALFQGPPQ
TruePositive	ANN46850	1434	1441	7.71e-09	-8.11295	ALFQGPPQ
TruePositive	ANJ61588	1434	1441	7.71e-09	-8.11295	ALFQGPPQ
TruePositive	QBA90621	1434	1441	7.71e-09	-8.11295	ALFQGPPQ
TruePositive	ALP31175	1434	1441	7.71e-09	-8.11295	ALFQGPPQ
TruePositive	ANJ61544	1434	1441	7.71e-09	-8.11295	ALFQGPPQ
TruePositive	ALJ53630	1434	1441	7.71e-09	-8.11295	ALFQGPPQ
TruePositive	ANQ44597	1434	1441	7.71e-09	-8.11295	ALFQGPPQ
TruePositive	ANJ61744	1434	1441	7.71e-09	-8.11295	ALFQGPPQ
TruePositive	AKU75604	1434	1441	7.71e-09	-8.11295	ALFQGPPQ
TruePositive	ALP31095	1434	1441	7.71e-09	-8.11295	ALFQGPPQ
TruePositive	AOF41443	1434	1441	7.71e-09	-8.11295	ALFQGPPQ
TruePositive	ALP31145	1434	1441	7.71e-09	-8.11295	ALFQGPPQ
TruePositive	BAW35421	1434	1441	7.71e-09	-8.11295	ALFQGPPQ
TruePositive	QEG13969	1434	1441	7.71e-09	-8.11295	ALFQGPPQ
TruePositive	AOF41450	1434	1441	7.71e-09	-8.11295	ALFQGPPQ
TruePositive	ANJ61750	1434	1441	7.71e-09	-8.11295	ALFQGPPQ
TruePositive	AJI76559	1434	1441	7.71e-09	-8.11295	ALFQGPPQ
TruePositive	ALG02131	1434	1441	7.71e-09	-8.11295	ALFQGPPQ
TruePositive	ANN46839	1434	1441	7.71e-09	-8.11295	ALFQGPPQ
TruePositive	ANJ61543	1434	1441	7.71e-09	-8.11295	ALFQGPPQ
TruePositive	ALP31117	1434	1441	7.71e-09	-8.11295	ALFQGPPQ
TruePositive	QEJ82281	1434	1441	7.71e-09	-8.11295	ALFQGPPQ
TruePositive	ANJ61719	1434	1441	7.71e-09	-8.11295	ALFQGPPQ
TruePositive	ANJ61747	1434	1441	7.71e-09	-8.11295	ALFQGPPQ
TruePositive	AOV86539	1434	1441	7.71e-09	-8.11295	ALFQGPPQ
TruePositive	AKT08833	1434	1441	7.71e-09	-8.11295	ALFQGPPQ
TruePositive	AWW21309	1434	1441	7.71e-09	-8.11295	ALFQGPPQ
TruePositive	ALP31174	1434	1441	7.71e-09	-8.11295	ALFQGPPQ
TruePositive	AIT52326	1434	1441	7.71e-09	-8.11295	ALFQGPPQ
TruePositive	ALP31112	1434	1441	7.71e-09	-8.11295	ALFQGPPQ
TruePositive	QEG13929	1434	1441	7.71e-09	-8.11295	ALFQGPPQ
TruePositive	AWW21312	1434	1441	7.71e-09	-8.11295	ALFQGPPQ
TruePositive	AWW21307	1434	1441	7.71e-09	-8.11295	ALFQGPPQ
TruePositive	ALP31168	1434	1441	7.71e-09	-8.11295	ALFQGPPQ
TruePositive	QCE20702	1434	1441	7.71e-09	-8.11295	ALFQGPPQ
TruePositive	ALP31169	1434	1441	7.71e-09	-8.11295	ALFQGPPQ
TruePositive	ALP31125	1434	1441	7.71e-09	-8.11295	ALFQGPPQ
TruePositive	ALP31178	1434	1441	7.71e-09	-8.11295	ALFQGPPQ
TruePositive	ANJ61539	1434	1441	7.71e-09	-8.11295	ALFQGPPQ
TruePositive	ANN46861	1434	1441	7.71e-09	-8.11295	ALFQGPPQ
TruePositive	QCE20634	1434	1441	7.71e-09	-8.11295	ALFQGPPQ
TruePositive	ALP31177	1434	1441	7.71e-09	-8.11295	ALFQGPPQ
TruePositive	ANJ61601	1434	1441	7.71e-09	-8.11295	ALFQGPPQ
TruePositive	ALP31165	1434	1441	7.71e-09	-8.11295	ALFQGPPQ
TruePositive	AOV86540	1434	1441	7.71e-09	-8.11295	ALFQGPPQ
TruePositive	ANN46855	1434	1441	7.71e-09	-8.11295	ALFQGPPQ
TruePositive	QEG13943	1434	1441	7.71e-09	-8.11295	ALFQGPPQ
TruePositive	ALP31149	1434	1441	7.71e-09	-8.11295	ALFQGPPQ
TruePositive	AIZ48771	1434	1441	7.71e-09	-8.11295	ALFQGPPQ
TruePositive	ANJ61751	1434	1441	7.71e-09	-8.11295	ALFQGPPQ
TruePositive	ANJ61580	1434	1441	7.71e-09	-8.11295	ALFQGPPQ
TruePositive	AKU75630	1434	1441	7.71e-09	-8.11295	ALFQGPPQ
TruePositive	ANJ61555	1434	1441	7.71e-09	-8.11295	ALFQGPPQ
TruePositive	BAW35417	1434	1441	7.71e-09	-8.11295	ALFQGPPQ
TruePositive	BBM96399	1434	1441	7.71e-09	-8.11295	ALFQGPPQ
TruePositive	ANJ61552	1434	1441	7.71e-09	-8.11295	ALFQGPPQ
TruePositive	ANJ61734	1434	1441	7.71e-09	-8.11295	ALFQGPPQ
TruePositive	QEG13983	1434	1441	7.71e-09	-8.11295	ALFQGPPQ
TruePositive	QEJ82279	1434	1441	7.71e-09	-8.11295	ALFQGPPQ
TruePositive	AKU75606	1434	1441	7.71e-09	-8.11295	ALFQGPPQ
TruePositive	AKU75623	1434	1441	7.71e-09	-8.11295	ALFQGPPQ
TruePositive	ANJ61720	1434	1441	7.71e-09	-8.11295	ALFQGPPQ
TruePositive	QEJ82274	1434	1441	7.71e-09	-8.11295	ALFQGPPQ
TruePositive	ANJ61553	1434	1441	7.71e-09	-8.11295	ALFQGPPQ
TruePositive	AOV86537	1434	1441	7.71e-09	-8.11295	ALFQGPPQ
TruePositive	ANJ61718	1434	1441	7.71e-09	-8.11295	ALFQGPPQ
TruePositive	QCE20693	1434	1441	7.71e-09	-8.11295	ALFQGPPQ
TruePositive	QCE20692	1434	1441	7.71e-09	-8.11295	ALFQGPPQ
TruePositive	QEG13965	1434	1441	7.71e-09	-8.11295	ALFQGPPQ
TruePositive	ALP31150	1434	1441	7.71e-09	-8.11295	ALFQGPPQ
TruePositive	AVW85865	1434	1441	7.71e-09	-8.11295	ALFQGPPQ
TruePositive	ALP31109	1434	1441	7.71e-09	-8.11295	ALFQGPPQ
TruePositive	BAW35415	1434	1441	7.71e-09	-8.11295	ALFQGPPQ
TruePositive	QEG13974	1434	1441	7.71e-09	-8.11295	ALFQGPPQ
TruePositive	AKU75627	1434	1441	7.71e-09	-8.11295	ALFQGPPQ
TruePositive	QEU45796	1434	1441	7.71e-09	-8.11295	ALFQGPPQ
TruePositive	ALP31087	1434	1441	7.71e-09	-8.11295	ALFQGPPQ
TruePositive	AKU75594	1434	1441	7.71e-09	-8.11295	ALFQGPPQ
TruePositive	QEG13979	1434	1441	7.71e-09	-8.11295	ALFQGPPQ
TruePositive	QEG13987	1434	1441	7.71e-09	-8.11295	ALFQGPPQ
TruePositive	ALP31164	1434	1441	7.71e-09	-8.11295	ALFQGPPQ
TruePositive	QEG13963	1434	1441	7.71e-09	-8.11295	ALFQGPPQ
TruePositive	ANJ61585	1434	1441	7.71e-09	-8.11295	ALFQGPPQ
TruePositive	AKU75607	1434	1441	7.71e-09	-8.11295	ALFQGPPQ
TruePositive	ANJ61745	1434	1441	7.71e-09	-8.11295	ALFQGPPQ
TruePositive	ALP31136	1434	1441	7.71e-09	-8.11295	ALFQGPPQ
TruePositive	QEJ82282	1434	1441	7.71e-09	-8.11295	ALFQGPPQ
TruePositive	AKU75615	1434	1441	7.71e-09	-8.11295	ALFQGPPQ
TruePositive	AOF41448	1434	1441	7.71e-09	-8.11295	ALFQGPPQ
TruePositive	ALP31113	1434	1441	7.71e-09	-8.11295	ALFQGPPQ
TruePositive	ANJ61737	1434	1441	7.71e-09	-8.11295	ALFQGPPQ
TruePositive	ANN46836	1434	1441	7.71e-09	-8.11295	ALFQGPPQ
TruePositive	ANJ61559	1434	1441	7.71e-09	-8.11295	ALFQGPPQ
TruePositive	YP_009505605	1434	1441	7.71e-09	-8.11295	ALFQGPPQ
TruePositive	QCE20704	1434	1441	7.71e-09	-8.11295	ALFQGPPQ
TruePositive	ALP31146	1434	1441	7.71e-09	-8.11295	ALFQGPPQ
TruePositive	ANJ61730	1434	1441	7.71e-09	-8.11295	ALFQGPPQ
TruePositive	QEG13958	1434	1441	7.71e-09	-8.11295	ALFQGPPQ
TruePositive	AJI76570	1434	1441	7.71e-09	-8.11295	ALFQGPPQ
TruePositive	AKU75643	1434	1441	7.71e-09	-8.11295	ALFQGPPQ
TruePositive	AOV86535	1434	1441	7.71e-09	-8.11295	ALFQGPPQ
TruePositive	ANN46843	1434	1441	7.71e-09	-8.11295	ALFQGPPQ
TruePositive	ANJ61736	1434	1441	7.71e-09	-8.11295	ALFQGPPQ
TruePositive	ANE37235	1434	1441	7.71e-09	-8.11295	ALFQGPPQ
TruePositive	ANE37234	1434	1441	7.71e-09	-8.11295	ALFQGPPQ
TruePositive	ALP31129	1434	1441	7.71e-09	-8.11295	ALFQGPPQ
TruePositive	ANJ61577	1434	1441	7.71e-09	-8.11295	ALFQGPPQ
TruePositive	QEG13961	1434	1441	7.71e-09	-8.11295	ALFQGPPQ
TruePositive	ANJ61723	1434	1441	7.71e-09	-8.11295	ALFQGPPQ
TruePositive	AKU75593	1434	1441	7.71e-09	-8.11295	ALFQGPPQ
TruePositive	AKT07950	1434	1441	7.71e-09	-8.11295	ALFQGPPQ
TruePositive	EV68polyprotein	1434	1441	7.71e-09	-8.11295	ALFQGPPQ
TruePositive	AKT08836	1434	1441	7.71e-09	-8.11295	ALFQGPPQ
TruePositive	BAW35416	1434	1441	7.71e-09	-8.11295	ALFQGPPQ
TruePositive	ANE37233	1434	1441	7.71e-09	-8.11295	ALFQGPPQ
TruePositive	ALP31107	1434	1441	7.71e-09	-8.11295	ALFQGPPQ
TruePositive	QEG13940	1434	1441	7.71e-09	-8.11295	ALFQGPPQ
TruePositive	ANQ69417	1434	1441	7.71e-09	-8.11295	ALFQGPPQ
TruePositive	ALP31090	1434	1441	7.71e-09	-8.11295	ALFQGPPQ
TruePositive	ANJ61743	1434	1441	7.71e-09	-8.11295	ALFQGPPQ
TruePositive	AYW17097	1434	1441	7.71e-09	-8.11295	ALFQGPPQ
TruePositive	ANJ61572	1434	1441	7.71e-09	-8.11295	ALFQGPPQ
TruePositive	ALP31108	1434	1441	7.71e-09	-8.11295	ALFQGPPQ
TruePositive	QEG13957	1434	1441	7.71e-09	-8.11295	ALFQGPPQ
TruePositive	AKU75601	1434	1441	7.71e-09	-8.11295	ALFQGPPQ
TruePositive	AKU75618	1434	1441	7.71e-09	-8.11295	ALFQGPPQ
TruePositive	ALP31119	1434	1441	7.71e-09	-8.11295	ALFQGPPQ
TruePositive	AKU75626	1434	1441	7.71e-09	-8.11295	ALFQGPPQ
TruePositive	AOF41449	1434	1441	7.71e-09	-8.11295	ALFQGPPQ
TruePositive	APU51947	1434	1441	7.71e-09	-8.11295	ALFQGPPQ
TruePositive	ANJ61722	1434	1441	7.71e-09	-8.11295	ALFQGPPQ
TruePositive	QEG13951	1434	1441	7.71e-09	-8.11295	ALFQGPPQ
TruePositive	ALP31156	1434	1441	7.71e-09	-8.11295	ALFQGPPQ
TruePositive	QEG13977	1434	1441	7.71e-09	-8.11295	ALFQGPPQ
TruePositive	QEG13980	1434	1441	7.71e-09	-8.11295	ALFQGPPQ
TruePositive	QEG13942	1434	1441	7.71e-09	-8.11295	ALFQGPPQ
TruePositive	AWW21305	1434	1441	7.71e-09	-8.11295	ALFQGPPQ
TruePositive	ANJ61735	1434	1441	7.71e-09	-8.11295	ALFQGPPQ
TruePositive	ANJ61586	1434	1441	7.71e-09	-8.11295	ALFQGPPQ
TruePositive	AOF41446	1434	1441	7.71e-09	-8.11295	ALFQGPPQ
TruePositive	APU51954	1434	1441	7.71e-09	-8.11295	ALFQGPPQ
TruePositive	AKU75628	1434	1441	7.71e-09	-8.11295	ALFQGPPQ
TruePositive	ANJ61600	1434	1441	7.71e-09	-8.11295	ALFQGPPQ
TruePositive	AJI76564	1434	1441	7.71e-09	-8.11295	ALFQGPPQ
TruePositive	ANN46859	1434	1441	7.71e-09	-8.11295	ALFQGPPQ
TruePositive	ALJ53629	1434	1441	7.71e-09	-8.11295	ALFQGPPQ
TruePositive	ANJ61731	1434	1441	7.71e-09	-8.11295	ALFQGPPQ
TruePositive	ANN46854	1434	1441	7.71e-09	-8.11295	ALFQGPPQ
TruePositive	AWW21308	1434	1441	7.71e-09	-8.11295	ALFQGPPQ
TruePositive	ALP31120	1434	1441	7.71e-09	-8.11295	ALFQGPPQ
TruePositive	QEG14007	1434	1441	7.71e-09	-8.11295	ALFQGPPQ
TruePositive	ANN46827	1434	1441	7.71e-09	-8.11295	ALFQGPPQ
TruePositive	QEG13946	1434	1441	7.71e-09	-8.11295	ALFQGPPQ
TruePositive	ANN46828	1434	1441	7.71e-09	-8.11295	ALFQGPPQ
TruePositive	AWW21302	1434	1441	7.71e-09	-8.11295	ALFQGPPQ
TruePositive	QCE20695	1434	1441	7.71e-09	-8.11295	ALFQGPPQ
TruePositive	QEG13992	1434	1441	7.71e-09	-8.11295	ALFQGPPQ
TruePositive	ALP31099	1434	1441	7.71e-09	-8.11295	ALFQGPPQ
TruePositive	QEU45794	1434	1441	7.71e-09	-8.11295	ALFQGPPQ
TruePositive	AKU75624	1434	1441	7.71e-09	-8.11295	ALFQGPPQ
TruePositive	APU51955	1434	1441	7.71e-09	-8.11295	ALFQGPPQ
TruePositive	AKU75646	1434	1441	7.71e-09	-8.11295	ALFQGPPQ
TruePositive	QCE20697	1434	1441	7.71e-09	-8.11295	ALFQGPPQ
TruePositive	ALP31170	1434	1441	7.71e-09	-8.11295	ALFQGPPQ
TruePositive	AKU75634	1434	1441	7.71e-09	-8.11295	ALFQGPPQ
TruePositive	ALP31133	1434	1441	7.71e-09	-8.11295	ALFQGPPQ
TruePositive	ANN46853	1434	1441	7.71e-09	-8.11295	ALFQGPPQ
TruePositive	BAW35420	1434	1441	7.71e-09	-8.11295	ALFQGPPQ
TruePositive	ANJ61549	1434	1441	7.71e-09	-8.11295	ALFQGPPQ
TruePositive	AKU75631	1434	1441	7.71e-09	-8.11295	ALFQGPPQ
TruePositive	AKU75645	1434	1441	7.71e-09	-8.11295	ALFQGPPQ
TruePositive	QEG13962	1434	1441	7.71e-09	-8.11295	ALFQGPPQ
TruePositive	AKU75603	1434	1441	7.71e-09	-8.11295	ALFQGPPQ
TruePositive	ALP31118	1434	1441	7.71e-09	-8.11295	ALFQGPPQ
TruePositive	ALP31131	1434	1441	7.71e-09	-8.11295	ALFQGPPQ
TruePositive	QEG13931	1434	1441	7.71e-09	-8.11295	ALFQGPPQ
TruePositive	ANJ61741	1434	1441	7.71e-09	-8.11295	ALFQGPPQ
TruePositive	ANJ61583	1434	1441	7.71e-09	-8.11295	ALFQGPPQ
TruePositive	ANJ61727	1434	1441	7.71e-09	-8.11295	ALFQGPPQ
TruePositive	ALP31162	1434	1441	7.71e-09	-8.11295	ALFQGPPQ
TruePositive	APU51945	1434	1441	7.71e-09	-8.11295	ALFQGPPQ
TruePositive	ALP31101	1434	1441	7.71e-09	-8.11295	ALFQGPPQ
TruePositive	AVW85864	1434	1441	7.71e-09	-8.11295	ALFQGPPQ
TruePositive	AAR98503	1434	1441	7.71e-09	-8.11295	ALFQGPPQ
TruePositive	ANN46833	1434	1441	7.71e-09	-8.11295	ALFQGPPQ
TruePositive	ALP31147	1434	1441	7.71e-09	-8.11295	ALFQGPPQ
TruePositive	BAW35419	1434	1441	7.71e-09	-8.11295	ALFQGPPQ
TruePositive	QEG13975	1434	1441	7.71e-09	-8.11295	ALFQGPPQ
TruePositive	BBM96400	1434	1441	7.71e-09	-8.11295	ALFQGPPQ
TruePositive	QEG13925	1434	1441	7.71e-09	-8.11295	ALFQGPPQ
TruePositive	QCE20696	1434	1441	7.71e-09	-8.11295	ALFQGPPQ
TruePositive	ANN46856	1434	1441	7.71e-09	-8.11295	ALFQGPPQ
TruePositive	QEG13971	1434	1441	7.71e-09	-8.11295	ALFQGPPQ
TruePositive	QEG13985	1434	1441	7.71e-09	-8.11295	ALFQGPPQ
TruePositive	ANN46841	1434	1441	7.71e-09	-8.11295	ALFQGPPQ
TruePositive	QEG13937	1434	1441	7.71e-09	-8.11295	ALFQGPPQ
TruePositive	BAK08578	1434	1441	7.71e-09	-8.11295	ALFQGPPQ
TruePositive	QCE20705	1434	1441	7.71e-09	-8.11295	ALFQGPPQ
TruePositive	ALP31091	1434	1441	7.71e-09	-8.11295	ALFQGPPQ
TruePositive	AKU75644	1434	1441	7.71e-09	-8.11295	ALFQGPPQ
TruePositive	AKU75591	1434	1441	7.71e-09	-8.11295	ALFQGPPQ
TruePositive	ANJ61589	1434	1441	7.71e-09	-8.11295	ALFQGPPQ
TruePositive	AKQ44192	1434	1441	7.71e-09	-8.11295	ALFQGPPQ
TruePositive	QEG13991	1434	1441	7.71e-09	-8.11295	ALFQGPPQ
TruePositive	ALP31121	1434	1441	7.71e-09	-8.11295	ALFQGPPQ
TruePositive	ANJ61562	1434	1441	7.71e-09	-8.11295	ALFQGPPQ
TruePositive	AKQ44191	1434	1441	7.71e-09	-8.11295	ALFQGPPQ
TruePositive	ALP31148	1434	1441	7.71e-09	-8.11295	ALFQGPPQ
TruePositive	AOF41452	1434	1441	7.71e-09	-8.11295	ALFQGPPQ
TruePositive	ANJ61565	1434	1441	7.71e-09	-8.11295	ALFQGPPQ
TruePositive	AKU75640	1434	1441	7.71e-09	-8.11295	ALFQGPPQ
TruePositive	ANJ61575	1434	1441	7.71e-09	-8.11295	ALFQGPPQ
TruePositive	ALP31144	1434	1441	7.71e-09	-8.11295	ALFQGPPQ
TruePositive	QEJ82278	1434	1441	7.71e-09	-8.11295	ALFQGPPQ
TruePositive	ALP31157	1434	1441	7.71e-09	-8.11295	ALFQGPPQ
TruePositive	AKU75625	1434	1441	7.71e-09	-8.11295	ALFQGPPQ
TruePositive	ALP31154	1434	1441	7.71e-09	-8.11295	ALFQGPPQ
TruePositive	ANN46832	1434	1441	7.71e-09	-8.11295	ALFQGPPQ
TruePositive	QEG13986	1434	1441	7.71e-09	-8.11295	ALFQGPPQ
TruePositive	AWW21301	1434	1441	7.71e-09	-8.11295	ALFQGPPQ
TruePositive	APU51946	1434	1441	7.71e-09	-8.11295	ALFQGPPQ
TruePositive	AYW17092	1434	1441	7.71e-09	-8.11295	ALFQGPPQ
TruePositive	AKQ44189	1434	1441	7.71e-09	-8.11295	ALFQGPPQ
TruePositive	ALP31127	1434	1441	7.71e-09	-8.11295	ALFQGPPQ
TruePositive	QEG13989	1434	1441	7.71e-09	-8.11295	ALFQGPPQ
TruePositive	AKU75642	1434	1441	7.71e-09	-8.11295	ALFQGPPQ
TruePositive	ANN46846	1434	1441	7.71e-09	-8.11295	ALFQGPPQ
TruePositive	AOV86541	1434	1441	7.71e-09	-8.11295	ALFQGPPQ
TruePositive	AOF41444	1434	1441	7.71e-09	-8.11295	ALFQGPPQ
TruePositive	ALP31093	1434	1441	7.71e-09	-8.11295	ALFQGPPQ
TruePositive	AKU75598	1434	1441	7.71e-09	-8.11295	ALFQGPPQ
TruePositive	ALP31110	1434	1441	7.71e-09	-8.11295	ALFQGPPQ
TruePositive	QCE20690	1434	1441	7.71e-09	-8.11295	ALFQGPPQ
TruePositive	ANQ69420	1434	1441	7.71e-09	-8.11295	ALFQGPPQ
TruePositive	AMB37294	1434	1441	7.71e-09	-8.11295	ALFQGPPQ
TruePositive	ALP31124	1434	1441	7.71e-09	-8.11295	ALFQGPPQ
TruePositive	QBA90620	1434	1441	7.71e-09	-8.11295	ALFQGPPQ
TruePositive	AKQ44190	1434	1441	7.71e-09	-8.11295	ALFQGPPQ
TruePositive	ANJ61742	1434	1441	7.71e-09	-8.11295	ALFQGPPQ
TruePositive	ANN46838	1434	1441	7.71e-09	-8.11295	ALFQGPPQ
TruePositive	AOV86534	1434	1441	7.71e-09	-8.11295	ALFQGPPQ
TruePositive	ANJ61573	1434	1441	7.71e-09	-8.11295	ALFQGPPQ
TruePositive	QEJ82283	1434	1441	7.71e-09	-8.11295	ALFQGPPQ
TruePositive	APP91863	1434	1441	7.71e-09	-8.11295	ALFQGPPQ
TruePositive	ANJ61557	1434	1441	7.71e-09	-8.11295	ALFQGPPQ
TruePositive	ANJ61560	1434	1441	7.71e-09	-8.11295	ALFQGPPQ
TruePositive	ALP31151	1434	1441	7.71e-09	-8.11295	ALFQGPPQ
TruePositive	ANN46851	1434	1441	7.71e-09	-8.11295	ALFQGPPQ
TruePositive	ANJ61593	1434	1441	7.71e-09	-8.11295	ALFQGPPQ
TruePositive	ANJ61738	1434	1441	7.71e-09	-8.11295	ALFQGPPQ
TruePositive	QEU45797	1434	1441	7.71e-09	-8.11295	ALFQGPPQ
TruePositive	ALP31160	1434	1441	7.71e-09	-8.11295	ALFQGPPQ
TruePositive	AKQ44196	1434	1441	7.71e-09	-8.11295	ALFQGPPQ
TruePositive	ANJ61554	1434	1441	7.71e-09	-8.11295	ALFQGPPQ
TruePositive	ALP31102	1434	1441	7.71e-09	-8.11295	ALFQGPPQ
TruePositive	QCE20706	1434	1441	7.71e-09	-8.11295	ALFQGPPQ
TruePositive	ANJ61746	1434	1441	7.71e-09	-8.11295	ALFQGPPQ
TruePositive	ALP31104	1434	1441	7.71e-09	-8.11295	ALFQGPPQ
TruePositive	ALP31163	1434	1441	7.71e-09	-8.11295	ALFQGPPQ
TruePositive	ALP31139	1434	1441	7.71e-09	-8.11295	ALFQGPPQ
TruePositive	ANJ61592	1434	1441	7.71e-09	-8.11295	ALFQGPPQ
TruePositive	ALP31085	1434	1441	7.71e-09	-8.11295	ALFQGPPQ
TruePositive	AYW17093	1434	1441	7.71e-09	-8.11295	ALFQGPPQ
TruePositive	ALP31179	1434	1441	7.71e-09	-8.11295	ALFQGPPQ
TruePositive	AKU75637	1434	1441	7.71e-09	-8.11295	ALFQGPPQ
TruePositive	QEG13984	1434	1441	7.71e-09	-8.11295	ALFQGPPQ
TruePositive	AKU75617	1434	1441	7.71e-09	-8.11295	ALFQGPPQ
TruePositive	ANJ61581	1434	1441	7.71e-09	-8.11295	ALFQGPPQ
TruePositive	ANJ61591	1434	1441	7.71e-09	-8.11295	ALFQGPPQ
TruePositive	APU51948	1434	1441	7.71e-09	-8.11295	ALFQGPPQ
TruePositive	ALP31171	1434	1441	7.71e-09	-8.11295	ALFQGPPQ
TruePositive	ALP31126	1434	1441	7.71e-09	-8.11295	ALFQGPPQ
TruePositive	QEJ82284	1434	1441	7.71e-09	-8.11295	ALFQGPPQ
TruePositive	ANZ79242	1434	1441	7.71e-09	-8.11295	ALFQGPPQ
TruePositive	APU51953	1434	1441	7.71e-09	-8.11295	ALFQGPPQ
TruePositive	QEG13953	1434	1441	7.71e-09	-8.11295	ALFQGPPQ
TruePositive	AJI76568	1434	1441	7.71e-09	-8.11295	ALFQGPPQ
TruePositive	AZL41614	1434	1441	7.71e-09	-8.11295	ALFQGPPQ
TruePositive	ANJ61597	1434	1441	7.71e-09	-8.11295	ALFQGPPQ
TruePositive	AOF41447	1434	1441	7.71e-09	-8.11295	ALFQGPPQ
TruePositive	QEU45798	1434	1441	7.71e-09	-8.11295	ALFQGPPQ
TruePositive	AWW21304	1434	1441	7.71e-09	-8.11295	ALFQGPPQ
TruePositive	ALP31105	1434	1441	7.71e-09	-8.11295	ALFQGPPQ
TruePositive	AJI76555	1434	1441	7.71e-09	-8.11295	ALFQGPPQ
TruePositive	ANJ61594	1434	1441	7.71e-09	-8.11295	ALFQGPPQ
TruePositive	ALP31152	1434	1441	7.71e-09	-8.11295	ALFQGPPQ
TruePositive	ANJ61566	1434	1441	7.71e-09	-8.11295	ALFQGPPQ
TruePositive	ANQ69419	1434	1441	7.71e-09	-8.11295	ALFQGPPQ
TruePositive	QEG13967	1434	1441	7.71e-09	-8.11295	ALFQGPPQ
TruePositive	APU51951	1434	1441	7.71e-09	-8.11295	ALFQGPPQ
TruePositive	QEG13959	1434	1441	7.71e-09	-8.11295	ALFQGPPQ
TruePositive	ANQ69416	1434	1441	7.71e-09	-8.11295	ALFQGPPQ
TruePositive	ALP31115	1434	1441	7.71e-09	-8.11295	ALFQGPPQ
TruePositive	ANJ61584	1434	1441	7.71e-09	-8.11295	ALFQGPPQ
TruePositive	ABL61317	1434	1441	7.71e-09	-8.11295	ALFQGPPQ
TruePositive	QCE20700	1434	1441	7.71e-09	-8.11295	ALFQGPPQ
TruePositive	ALP31123	1434	1441	7.71e-09	-8.11295	ALFQGPPQ
TruePositive	AOV86538	1434	1441	7.71e-09	-8.11295	ALFQGPPQ
TruePositive	AWW18929	1434	1441	7.71e-09	-8.11295	ALFQGPPQ
TruePositive	APU51952	1434	1441	7.71e-09	-8.11295	ALFQGPPQ
TruePositive	APU51956	1434	1441	7.71e-09	-8.11295	ALFQGPPQ
TruePositive	AYW17090	1434	1441	7.71e-09	-8.11295	ALFQGPPQ
TruePositive	ALP31083	1434	1441	7.71e-09	-8.11295	ALFQGPPQ
TruePositive	ALP31094	1434	1441	7.71e-09	-8.11295	ALFQGPPQ
TruePositive	QEJ82271	1434	1441	7.71e-09	-8.11295	ALFQGPPQ
TruePositive	ALP31096	1434	1441	7.71e-09	-8.11295	ALFQGPPQ
TruePositive	AKU75599	1434	1441	7.71e-09	-8.11295	ALFQGPPQ
TruePositive	QEG13970	1434	1441	7.71e-09	-8.11295	ALFQGPPQ
TruePositive	AKU75608	1434	1441	7.71e-09	-8.11295	ALFQGPPQ
TruePositive	AKU75602	1434	1441	7.71e-09	-8.11295	ALFQGPPQ
TruePositive	QEG13938	1434	1441	7.71e-09	-8.11295	ALFQGPPQ
TruePositive	ANN46858	1434	1441	7.71e-09	-8.11295	ALFQGPPQ
TruePositive	ALP31086	1434	1441	7.71e-09	-8.11295	ALFQGPPQ
TruePositive	ALP31135	1434	1441	7.71e-09	-8.11295	ALFQGPPQ
TruePositive	ALP31106	1434	1441	7.71e-09	-8.11295	ALFQGPPQ
TruePositive	QEG13976	1434	1441	7.71e-09	-8.11295	ALFQGPPQ
TruePositive	QEG13966	1434	1441	7.71e-09	-8.11295	ALFQGPPQ
TruePositive	ALP31180	1434	1441	7.71e-09	-8.11295	ALFQGPPQ
TruePositive	ANN46852	1434	1441	7.71e-09	-8.11295	ALFQGPPQ
TruePositive	ANN46842	1434	1441	7.71e-09	-8.11295	ALFQGPPQ
TruePositive	ANJ61728	1434	1441	7.71e-09	-8.11295	ALFQGPPQ
TruePositive	ANN46848	1434	1441	7.71e-09	-8.11295	ALFQGPPQ
TruePositive	ANN46831	1434	1441	7.71e-09	-8.11295	ALFQGPPQ
TruePositive	ANJ61599	1434	1441	7.71e-09	-8.11295	ALFQGPPQ
TruePositive	ANE37236	1434	1441	7.71e-09	-8.11295	ALFQGPPQ
TruePositive	ANZ79244	1434	1441	7.71e-09	-8.11295	ALFQGPPQ
TruePositive	ANJ61748	1434	1441	7.71e-09	-8.11295	ALFQGPPQ
TruePositive	ALP31089	1434	1441	7.71e-09	-8.11295	ALFQGPPQ
TruePositive	ALP31173	1434	1441	7.71e-09	-8.11295	ALFQGPPQ
TruePositive	ANN46826	1434	1441	7.71e-09	-8.11295	ALFQGPPQ
TruePositive	AYW17085	1435	1442	7.71e-09	-8.11295	ALFQGPPQ
TruePositive	AIA24394	1435	1442	7.71e-09	-8.11295	ALFQGPPQ
TruePositive	AIS73057	1435	1442	7.71e-09	-8.11295	ALFQGPPQ
TruePositive	AKT08826	1435	1442	7.71e-09	-8.11295	ALFQGPPQ
TruePositive	AYW17095	1435	1442	7.71e-09	-8.11295	ALFQGPPQ
TruePositive	ANG56888	1435	1442	7.71e-09	-8.11295	ALFQGPPQ
TruePositive	AWW21320	1435	1442	7.71e-09	-8.11295	ALFQGPPQ
TruePositive	AWW21318	1435	1442	7.71e-09	-8.11295	ALFQGPPQ
TruePositive	AYW17098	1435	1442	7.71e-09	-8.11295	ALFQGPPQ
TruePositive	AYW17088	1435	1442	7.71e-09	-8.11295	ALFQGPPQ
TruePositive	AWW21317	1435	1442	7.71e-09	-8.11295	ALFQGPPQ
TruePositive	AKQ44194	1435	1442	7.71e-09	-8.11295	ALFQGPPQ
TruePositive	AWW21316	1435	1442	7.71e-09	-8.11295	ALFQGPPQ
TruePositive	AYW17091	1435	1442	7.71e-09	-8.11295	ALFQGPPQ
TruePositive	AYW17096	1435	1442	7.71e-09	-8.11295	ALFQGPPQ
TruePositive	AWW21314	1435	1442	7.71e-09	-8.11295	ALFQGPPQ
TruePositive	ALT66861	1435	1442	7.71e-09	-8.11295	ALFQGPPQ
TruePositive	AWW21321	1435	1442	7.71e-09	-8.11295	ALFQGPPQ
TruePositive	AWW21319	1435	1442	7.71e-09	-8.11295	ALFQGPPQ
TruePositive	AYW17087	1435	1442	7.71e-09	-8.11295	ALFQGPPQ
TruePositive	AYW17086	1435	1442	7.71e-09	-8.11295	ALFQGPPQ
TruePositive	AKT08835	1435	1442	7.71e-09	-8.11295	ALFQGPPQ
TruePositive	AWW21315	1435	1442	7.71e-09	-8.11295	ALFQGPPQ
TruePositive	AKQ44193	1435	1442	7.71e-09	-8.11295	ALFQGPPQ
TruePositive	AWW21313	1435	1442	7.71e-09	-8.11295	ALFQGPPQ
TruePositive	ABK88241	1436	1443	7.71e-09	-8.11295	ALFQGPPQ
TruePositive	ABV25904	1436	1443	7.71e-09	-8.11295	ALFQGPPQ
TruePositive	ABL61316	1436	1443	7.71e-09	-8.11295	ALFQGPPQ
TruePositive	AFR77805	1437	1444	7.71e-09	-8.11295	ALFQGPPQ
TruePositive	AAW30684	1438	1445	7.71e-09	-8.11295	ALFQGPPQ
TruePositive	BAD95475	1438	1445	7.71e-09	-8.11295	ALFQGPPQ
TruePositive	AAV41051	1438	1445	7.71e-09	-8.11295	ALFQGPPQ
TruePositive	AFR77804	1438	1445	7.71e-09	-8.11295	ALFQGPPQ
TruePositive	AFR77803	1438	1445	7.71e-09	-8.11295	ALFQGPPQ
TruePositive	AAW30685	1440	1447	7.71e-09	-8.11295	ALFQGPPQ
TruePositive	AGA12643	1451	1458	7.71e-09	-8.11295	ALFQGPPQ
TruePositive	ABM54521	1454	1461	7.71e-09	-8.11295	ALFQGPPQ
TruePositive	BBD13572	1408	1415	1.65e-08	-7.78252	ALFQGPPV
TruePositive	ADW78250	1410	1417	1.65e-08	-7.78252	ALFQGPPV
TruePositive	AFQ55916	1411	1418	1.65e-08	-7.78252	ALFQGPPV
TruePositive	ARM53611	1413	1420	1.65e-08	-7.78252	ALFQGPPV
TruePositive	AFK66746	1414	1421	1.65e-08	-7.78252	ALFQGPPV
TruePositive	ANZ02994	1421	1428	1.65e-08	-7.78252	ALFQGPPV
TruePositive	YP_003358790	1421	1428	1.65e-08	-7.78252	ALFQGPPV
TruePositive	YP_003358790	1421	1428	1.65e-08	-7.78252	ALFQGPPV
TruePositive	APR72754	1423	1430	1.65e-08	-7.78252	ALFQGPPV
TruePositive	YP_009028564	1423	1430	1.65e-08	-7.78252	ALFQGPPV
TruePositive	AGC54436	1423	1430	1.65e-08	-7.78252	ALFQGPPV
TruePositive	CRL46950	1423	1430	1.65e-08	-7.78252	ALFQGPPV
TruePositive	ATV91596	1424	1431	1.65e-08	-7.78252	ALFQGPPV
TruePositive	APX43287	1424	1431	1.65e-08	-7.78252	ALFQGPPV
TruePositive	AHL77761	1424	1431	1.65e-08	-7.78252	ALFQGPPV
TruePositive	AUF49675	1424	1431	1.65e-08	-7.78252	ALFQGPPV
TruePositive	APW91090	1424	1431	1.65e-08	-7.78252	ALFQGPPV
TruePositive	AHY03306	1424	1431	1.65e-08	-7.78252	ALFQGPPV
TruePositive	AUO29155	1424	1431	1.65e-08	-7.78252	ALFQGPPV
TruePositive	AAQ73083	1424	1431	1.65e-08	-7.78252	ALFQGPPV
TruePositive	AUF49628	1424	1431	1.65e-08	-7.78252	ALFQGPPV
TruePositive	ALM88626	1424	1431	1.65e-08	-7.78252	ALFQGPPV
TruePositive	ABF19105	1424	1431	1.65e-08	-7.78252	ALFQGPPV
TruePositive	AAQ73093	1424	1431	1.65e-08	-7.78252	ALFQGPPV
TruePositive	AKL88020	1424	1431	1.65e-08	-7.78252	ALFQGPPV
TruePositive	ALB73000	1424	1431	1.65e-08	-7.78252	ALFQGPPV
TruePositive	APT69848	1424	1431	1.65e-08	-7.78252	ALFQGPPV
TruePositive	AFR79234	1424	1431	1.65e-08	-7.78252	ALFQGPPV
TruePositive	AHJ40480	1424	1431	1.65e-08	-7.78252	ALFQGPPV
TruePositive	AAQ73094	1424	1431	1.65e-08	-7.78252	ALFQGPPV
TruePositive	AUF49647	1424	1431	1.65e-08	-7.78252	ALFQGPPV
TruePositive	CAA29172	1424	1431	1.65e-08	-7.78252	ALFQGPPV
TruePositive	AFD32988	1425	1432	1.65e-08	-7.78252	ALFQGPPV
TruePositive	AAF21972	1425	1432	1.65e-08	-7.78252	ALFQGPPV
TruePositive	ACY40750	1425	1432	1.65e-08	-7.78252	ALFQGPPV
TruePositive	AFY09605	1425	1432	1.65e-08	-7.78252	ALFQGPPV
TruePositive	AAF12719	1425	1432	1.65e-08	-7.78252	ALFQGPPV
TruePositive	AAD02132	1425	1432	1.65e-08	-7.78252	ALFQGPPV
TruePositive	AKD28015	1426	1433	1.65e-08	-7.78252	ALFQGPPV
TruePositive	AKE33319	1426	1433	1.65e-08	-7.78252	ALFQGPPV
TruePositive	AHK09954	1426	1433	1.65e-08	-7.78252	ALFQGPPV
TruePositive	ACS34758	1426	1433	1.65e-08	-7.78252	ALFQGPPV
TruePositive	AFO42820	1426	1433	1.65e-08	-7.78252	ALFQGPPV
TruePositive	AUF49654	1426	1433	1.65e-08	-7.78252	ALFQGPPV
TruePositive	AEX07779	1426	1433	1.65e-08	-7.78252	ALFQGPPV
TruePositive	AAG23919	1426	1433	1.65e-08	-7.78252	ALFQGPPV
TruePositive	AAV34212	1426	1433	1.65e-08	-7.78252	ALFQGPPV
TruePositive	AMB57007	1426	1433	1.65e-08	-7.78252	ALFQGPPV
TruePositive	AMB56998	1426	1433	1.65e-08	-7.78252	ALFQGPPV
TruePositive	AAG23918	1426	1433	1.65e-08	-7.78252	ALFQGPPV
TruePositive	AEH42467	1426	1433	1.65e-08	-7.78252	ALFQGPPV
TruePositive	AAA42931	1426	1433	1.65e-08	-7.78252	ALFQGPPV
TruePositive	AMB57005	1426	1433	1.65e-08	-7.78252	ALFQGPPV
TruePositive	AKE33316	1426	1433	1.65e-08	-7.78252	ALFQGPPV
TruePositive	AUF49630	1426	1433	1.65e-08	-7.78252	ALFQGPPV
TruePositive	AKE33317	1426	1433	1.65e-08	-7.78252	ALFQGPPV
TruePositive	AIZ97146	1426	1433	1.65e-08	-7.78252	ALFQGPPV
TruePositive	AFO42819	1426	1433	1.65e-08	-7.78252	ALFQGPPV
TruePositive	ALB73005	1426	1433	1.65e-08	-7.78252	ALFQGPPV
TruePositive	AUF49636	1426	1433	1.65e-08	-7.78252	ALFQGPPV
TruePositive	AUO29149	1426	1433	1.65e-08	-7.78252	ALFQGPPV
TruePositive	ATV91618	1426	1433	1.65e-08	-7.78252	ALFQGPPV
TruePositive	AUF49643	1426	1433	1.65e-08	-7.78252	ALFQGPPV
TruePositive	AEH42468	1426	1433	1.65e-08	-7.78252	ALFQGPPV
TruePositive	ALX38425	1426	1433	1.65e-08	-7.78252	ALFQGPPV
TruePositive	AAG23920	1426	1433	1.65e-08	-7.78252	ALFQGPPV
TruePositive	AMY98705	1426	1433	1.65e-08	-7.78252	ALFQGPPV
TruePositive	AMB56999	1426	1433	1.65e-08	-7.78252	ALFQGPPV
TruePositive	AEK98148	1426	1433	1.65e-08	-7.78252	ALFQGPPV
TruePositive	AFD33642	1426	1433	1.65e-08	-7.78252	ALFQGPPV
TruePositive	AKE33318	1426	1433	1.65e-08	-7.78252	ALFQGPPV
TruePositive	AUF49639	1426	1433	1.65e-08	-7.78252	ALFQGPPV
TruePositive	AAB59927	1426	1433	1.65e-08	-7.78252	ALFQGPPV
TruePositive	AUO29150	1426	1433	1.65e-08	-7.78252	ALFQGPPV
TruePositive	ALX38426	1426	1433	1.65e-08	-7.78252	ALFQGPPV
TruePositive	AHM88285	1426	1433	1.65e-08	-7.78252	ALFQGPPV
TruePositive	AAF81252	1426	1433	1.65e-08	-7.78252	ALFQGPPV
TruePositive	AGJ72750	1426	1433	1.65e-08	-7.78252	ALFQGPPV
TruePositive	AAT79531	1426	1433	1.65e-08	-7.78252	ALFQGPPV
TruePositive	ARB48778	1426	1433	1.65e-08	-7.78252	ALFQGPPV
TruePositive	AAW71476	1426	1433	1.65e-08	-7.78252	ALFQGPPV
TruePositive	AMB57000	1426	1433	1.65e-08	-7.78252	ALFQGPPV
TruePositive	AIZ97145	1426	1433	1.65e-08	-7.78252	ALFQGPPV
TruePositive	AMB57002	1426	1433	1.65e-08	-7.78252	ALFQGPPV
TruePositive	ABN49456	1426	1433	1.65e-08	-7.78252	ALFQGPPV
TruePositive	AUF49642	1426	1433	1.65e-08	-7.78252	ALFQGPPV
TruePositive	AAF21971	1426	1433	1.65e-08	-7.78252	ALFQGPPV
TruePositive	AGC54437	1426	1433	1.65e-08	-7.78252	ALFQGPPV
TruePositive	AMB57003	1426	1433	1.65e-08	-7.78252	ALFQGPPV
TruePositive	AMB57006	1426	1433	1.65e-08	-7.78252	ALFQGPPV
TruePositive	AUF49668	1426	1433	1.65e-08	-7.78252	ALFQGPPV
TruePositive	AAV34211	1426	1433	1.65e-08	-7.78252	ALFQGPPV
TruePositive	AAA74400	1426	1433	1.65e-08	-7.78252	ALFQGPPV
TruePositive	AMB57001	1426	1433	1.65e-08	-7.78252	ALFQGPPV
TruePositive	AUF49657	1426	1433	1.65e-08	-7.78252	ALFQGPPV
TruePositive	AUF49652	1426	1433	1.65e-08	-7.78252	ALFQGPPV
TruePositive	AAX47040	1426	1433	1.65e-08	-7.78252	ALFQGPPV
TruePositive	BAA00337	1426	1433	1.65e-08	-7.78252	ALFQGPPV
TruePositive	AFS18536	1426	1433	1.65e-08	-7.78252	ALFQGPPV
TruePositive	AMB57004	1426	1433	1.65e-08	-7.78252	ALFQGPPV
TruePositive	AFO42817	1426	1433	1.65e-08	-7.78252	ALFQGPPV
TruePositive	AIZ97147	1426	1433	1.65e-08	-7.78252	ALFQGPPV
TruePositive	AHY19027	1426	1433	1.65e-08	-7.78252	ALFQGPPV
TruePositive	ARO77489	1426	1433	1.65e-08	-7.78252	ALFQGPPV
TruePositive	AMB57008	1426	1433	1.65e-08	-7.78252	ALFQGPPV
TruePositive	ACJ05389	1426	1433	1.65e-08	-7.78252	ALFQGPPV
TruePositive	ACH91034	1426	1433	1.65e-08	-7.78252	ALFQGPPV
TruePositive	AAR06974	1426	1433	1.65e-08	-7.78252	ALFQGPPV
TruePositive	AAB02228	1426	1433	1.65e-08	-7.78252	ALFQGPPV
TruePositive	AUF49632	1426	1433	1.65e-08	-7.78252	ALFQGPPV
TruePositive	AFO42818	1426	1433	1.65e-08	-7.78252	ALFQGPPV
TruePositive	AUF49659	1428	1435	1.65e-08	-7.78252	ALFQGPPV
TruePositive	AUF49645	1428	1435	1.65e-08	-7.78252	ALFQGPPV
TruePositive	AUF49633	1428	1435	1.65e-08	-7.78252	ALFQGPPV
TruePositive	AUF49623	1428	1435	1.65e-08	-7.78252	ALFQGPPV
TruePositive	AUF49670	1428	1435	1.65e-08	-7.78252	ALFQGPPV
TruePositive	AFR11453	1429	1436	1.65e-08	-7.78252	ALFQGPPV
TruePositive	AAQ73076	1429	1436	1.65e-08	-7.78252	ALFQGPPV
TruePositive	AAK13071	1429	1436	1.65e-08	-7.78252	ALFQGPPV
TruePositive	AAQ73088	1429	1436	1.65e-08	-7.78252	ALFQGPPV
TruePositive	AIN45139	1429	1436	1.65e-08	-7.78252	ALFQGPPV
TruePositive	AAT65951	1429	1436	1.65e-08	-7.78252	ALFQGPPV
TruePositive	ADO32837	1430	1437	1.65e-08	-7.78252	ALFQGPPV
TruePositive	ANP43754	1430	1437	1.65e-08	-7.78252	ALFQGPPV
TruePositive	AGU38786	1430	1437	1.65e-08	-7.78252	ALFQGPPV
TruePositive	ANP43766	1430	1437	1.65e-08	-7.78252	ALFQGPPV
TruePositive	ANP43757	1430	1437	1.65e-08	-7.78252	ALFQGPPV
TruePositive	ANP43762	1430	1437	1.65e-08	-7.78252	ALFQGPPV
TruePositive	BAG70422	1430	1437	1.65e-08	-7.78252	ALFQGPPV
TruePositive	ANP43764	1430	1437	1.65e-08	-7.78252	ALFQGPPV
TruePositive	ANP43760	1430	1437	1.65e-08	-7.78252	ALFQGPPV
TruePositive	ANP43763	1430	1437	1.65e-08	-7.78252	ALFQGPPV
TruePositive	AAX47043	1430	1437	1.65e-08	-7.78252	ALFQGPPV
TruePositive	ANP43761	1430	1437	1.65e-08	-7.78252	ALFQGPPV
TruePositive	ANP43765	1430	1437	1.65e-08	-7.78252	ALFQGPPV
TruePositive	ANP43759	1430	1437	1.65e-08	-7.78252	ALFQGPPV
TruePositive	ANP43758	1430	1437	1.65e-08	-7.78252	ALFQGPPV
TruePositive	ANP43755	1430	1437	1.65e-08	-7.78252	ALFQGPPV
TruePositive	AAX47038	1431	1438	1.65e-08	-7.78252	ALFQGPPV
TruePositive	CAD38168	1431	1438	1.65e-08	-7.78252	ALFQGPPV
TruePositive	AAQ73080	1431	1438	1.65e-08	-7.78252	ALFQGPPV
TruePositive	AUF49635	1432	1439	1.65e-08	-7.78252	ALFQGPPV
TruePositive	AFK29633	1432	1439	1.65e-08	-7.78252	ALFQGPPV
TruePositive	AUO29156	1432	1439	1.65e-08	-7.78252	ALFQGPPV
TruePositive	ARF07867	1432	1439	1.65e-08	-7.78252	ALFQGPPV
TruePositive	AAQ73095	1432	1439	1.65e-08	-7.78252	ALFQGPPV
TruePositive	AMD82550	1432	1439	1.65e-08	-7.78252	ALFQGPPV
TruePositive	AAA65044	1432	1439	1.65e-08	-7.78252	ALFQGPPV
TruePositive	AIK66522	1432	1439	1.65e-08	-7.78252	ALFQGPPV
TruePositive	AGC54438	1432	1439	1.65e-08	-7.78252	ALFQGPPV
TruePositive	BAM44537	1432	1439	1.65e-08	-7.78252	ALFQGPPV
TruePositive	BAM44536	1432	1439	1.65e-08	-7.78252	ALFQGPPV
TruePositive	AAQ04840	1432	1439	1.65e-08	-7.78252	ALFQGPPV
TruePositive	AFO83469	1432	1439	1.65e-08	-7.78252	ALFQGPPV
TruePositive	ALB73006	1432	1439	1.65e-08	-7.78252	ALFQGPPV
TruePositive	AMD82549	1432	1439	1.65e-08	-7.78252	ALFQGPPV
TruePositive	BAM44539	1432	1439	1.65e-08	-7.78252	ALFQGPPV
TruePositive	ABK41189	1432	1439	1.65e-08	-7.78252	ALFQGPPV
TruePositive	AIK66521	1432	1439	1.65e-08	-7.78252	ALFQGPPV
TruePositive	AKE33309	1432	1439	1.65e-08	-7.78252	ALFQGPPV
TruePositive	AFV25598	1432	1439	1.65e-08	-7.78252	ALFQGPPV
TruePositive	ARR74572	1432	1439	1.65e-08	-7.78252	ALFQGPPV
TruePositive	AAX47035	1432	1439	1.65e-08	-7.78252	ALFQGPPV
TruePositive	BAM44538	1432	1439	1.65e-08	-7.78252	ALFQGPPV
TruePositive	AFU93430	1433	1440	1.65e-08	-7.78252	ALFQGPPV
TruePositive	BAG70420	1433	1440	1.65e-08	-7.78252	ALFQGPPV
TruePositive	AGC03215	1433	1440	1.65e-08	-7.78252	ALFQGPPV
TruePositive	BAG70419	1433	1440	1.65e-08	-7.78252	ALFQGPPV
TruePositive	AHL27172	1433	1440	1.65e-08	-7.78252	ALFQGPPV
TruePositive	AGC03213	1433	1440	1.65e-08	-7.78252	ALFQGPPV
TruePositive	APZ85755	1433	1440	1.65e-08	-7.78252	ALFQGPPV
TruePositive	AGC03214	1433	1440	1.65e-08	-7.78252	ALFQGPPV
TruePositive	APZ85757	1433	1440	1.65e-08	-7.78252	ALFQGPPV
TruePositive	AAX47041	1433	1440	1.65e-08	-7.78252	ALFQGPPV
TruePositive	AAX47039	1433	1440	1.65e-08	-7.78252	ALFQGPPV
TruePositive	APZ85756	1433	1440	1.65e-08	-7.78252	ALFQGPPV
TruePositive	APZ85758	1433	1440	1.65e-08	-7.78252	ALFQGPPV
TruePositive	AGC03216	1433	1440	1.65e-08	-7.78252	ALFQGPPV
TruePositive	AGN90901	1433	1440	1.65e-08	-7.78252	ALFQGPPV
TruePositive	ABK41188	1433	1440	1.65e-08	-7.78252	ALFQGPPV
TruePositive	CAA54783	1434	1441	1.65e-08	-7.78252	ALFQGPPV
TruePositive	CAA55650	1434	1441	1.65e-08	-7.78252	ALFQGPPV
TruePositive	AAT65964	1434	1441	1.65e-08	-7.78252	ALFQGPPV
TruePositive	AIN45140	1434	1441	1.65e-08	-7.78252	ALFQGPPV
TruePositive	AAQ73087	1434	1441	1.65e-08	-7.78252	ALFQGPPV
TruePositive	AAX47034	1435	1442	1.65e-08	-7.78252	ALFQGPPV
TruePositive	AVM86032	1435	1442	1.65e-08	-7.78252	ALFQGPPV
TruePositive	AGC54440	1435	1442	1.65e-08	-7.78252	ALFQGPPV
TruePositive	BAG70421	1435	1442	1.65e-08	-7.78252	ALFQGPPV
TruePositive	AUF49663	1435	1442	1.65e-08	-7.78252	ALFQGPPV
TruePositive	AUF49651	1435	1442	1.65e-08	-7.78252	ALFQGPPV
TruePositive	AVM86030	1435	1442	1.65e-08	-7.78252	ALFQGPPV
TruePositive	AUO29157	1435	1442	1.65e-08	-7.78252	ALFQGPPV
TruePositive	AAL37155	1435	1442	1.65e-08	-7.78252	ALFQGPPV
TruePositive	AUF49644	1435	1442	1.65e-08	-7.78252	ALFQGPPV
TruePositive	ABF82247	1435	1442	1.65e-08	-7.78252	ALFQGPPV
TruePositive	AGC54439	1435	1442	1.65e-08	-7.78252	ALFQGPPV
TruePositive	BAK57455	1435	1442	1.65e-08	-7.78252	ALFQGPPV
TruePositive	AHJ14762	1435	1442	1.65e-08	-7.78252	ALFQGPPV
TruePositive	AUO29153	1435	1442	1.65e-08	-7.78252	ALFQGPPV
TruePositive	BAK57450	1435	1442	1.65e-08	-7.78252	ALFQGPPV
TruePositive	AKA43773	1435	1442	1.65e-08	-7.78252	ALFQGPPV
TruePositive	AAQ04839	1435	1442	1.65e-08	-7.78252	ALFQGPPV
TruePositive	ASU43933	1435	1442	1.65e-08	-7.78252	ALFQGPPV
TruePositive	ASZ69778	1435	1442	1.65e-08	-7.78252	ALFQGPPV
TruePositive	AJD14709	1435	1442	1.65e-08	-7.78252	ALFQGPPV
TruePositive	AFA26358	1435	1442	1.65e-08	-7.78252	ALFQGPPV
TruePositive	BAK57446	1435	1442	1.65e-08	-7.78252	ALFQGPPV
TruePositive	AAQ73089	1435	1442	1.65e-08	-7.78252	ALFQGPPV
TruePositive	AUF49676	1435	1442	1.65e-08	-7.78252	ALFQGPPV
TruePositive	AVM86033	1435	1442	1.65e-08	-7.78252	ALFQGPPV
TruePositive	AKE33312	1435	1442	1.65e-08	-7.78252	ALFQGPPV
TruePositive	AUO29152	1435	1442	1.65e-08	-7.78252	ALFQGPPV
TruePositive	AMD82548	1435	1442	1.65e-08	-7.78252	ALFQGPPV
TruePositive	AVM86035	1435	1442	1.65e-08	-7.78252	ALFQGPPV
TruePositive	AVI04999	1435	1442	1.65e-08	-7.78252	ALFQGPPV
TruePositive	BAK57456	1435	1442	1.65e-08	-7.78252	ALFQGPPV
TruePositive	AAD45119	1435	1442	1.65e-08	-7.78252	ALFQGPPV
TruePositive	ABB45874	1435	1442	1.65e-08	-7.78252	ALFQGPPV
TruePositive	BAK57449	1435	1442	1.65e-08	-7.78252	ALFQGPPV
TruePositive	BAK57451	1435	1442	1.65e-08	-7.78252	ALFQGPPV
TruePositive	AVI05001	1435	1442	1.65e-08	-7.78252	ALFQGPPV
TruePositive	AVI05000	1435	1442	1.65e-08	-7.78252	ALFQGPPV
TruePositive	AAQ73084	1435	1442	1.65e-08	-7.78252	ALFQGPPV
TruePositive	AAQ73096	1435	1442	1.65e-08	-7.78252	ALFQGPPV
TruePositive	AAQ73090	1435	1442	1.65e-08	-7.78252	ALFQGPPV
TruePositive	AMD82545	1435	1442	1.65e-08	-7.78252	ALFQGPPV
TruePositive	AAK85711	1435	1442	1.65e-08	-7.78252	ALFQGPPV
TruePositive	BAK57453	1435	1442	1.65e-08	-7.78252	ALFQGPPV
TruePositive	AIY58060	1435	1442	1.65e-08	-7.78252	ALFQGPPV
TruePositive	BAK57448	1435	1442	1.65e-08	-7.78252	ALFQGPPV
TruePositive	CAH61520	1435	1442	1.65e-08	-7.78252	ALFQGPPV
TruePositive	AUF49626	1435	1442	1.65e-08	-7.78252	ALFQGPPV
TruePositive	AFY23012	1435	1442	1.65e-08	-7.78252	ALFQGPPV
TruePositive	AHE93351	1435	1442	1.65e-08	-7.78252	ALFQGPPV
TruePositive	AAX49550	1435	1442	1.65e-08	-7.78252	ALFQGPPV
TruePositive	BAK57452	1435	1442	1.65e-08	-7.78252	ALFQGPPV
TruePositive	ADG63656	1435	1442	1.65e-08	-7.78252	ALFQGPPV
TruePositive	AUO29151	1435	1442	1.65e-08	-7.78252	ALFQGPPV
TruePositive	AIG92834	1435	1442	1.65e-08	-7.78252	ALFQGPPV
TruePositive	AJR20996	1435	1442	1.65e-08	-7.78252	ALFQGPPV
TruePositive	BAK57454	1435	1442	1.65e-08	-7.78252	ALFQGPPV
TruePositive	AAX47033	1435	1442	1.65e-08	-7.78252	ALFQGPPV
TruePositive	AUF49625	1435	1442	1.65e-08	-7.78252	ALFQGPPV
TruePositive	AAQ73086	1435	1442	1.65e-08	-7.78252	ALFQGPPV
TruePositive	AUD08528	1436	1443	1.65e-08	-7.78252	ALFQGPPV
TruePositive	AUD08524	1436	1443	1.65e-08	-7.78252	ALFQGPPV
TruePositive	AUD08535	1436	1443	1.65e-08	-7.78252	ALFQGPPV
TruePositive	AUD08532	1436	1443	1.65e-08	-7.78252	ALFQGPPV
TruePositive	AUD08526	1436	1443	1.65e-08	-7.78252	ALFQGPPV
TruePositive	CAE12177	1436	1443	1.65e-08	-7.78252	ALFQGPPV
TruePositive	AUD08525	1436	1443	1.65e-08	-7.78252	ALFQGPPV
TruePositive	AUD08533	1436	1443	1.65e-08	-7.78252	ALFQGPPV
TruePositive	AAX47036	1436	1443	1.65e-08	-7.78252	ALFQGPPV
TruePositive	AUD08537	1436	1443	1.65e-08	-7.78252	ALFQGPPV
TruePositive	AUD08538	1436	1443	1.65e-08	-7.78252	ALFQGPPV
TruePositive	AAX47042	1436	1443	1.65e-08	-7.78252	ALFQGPPV
TruePositive	AUD08541	1436	1443	1.65e-08	-7.78252	ALFQGPPV
TruePositive	AUD08523	1436	1443	1.65e-08	-7.78252	ALFQGPPV
TruePositive	CAC82172	1436	1443	1.65e-08	-7.78252	ALFQGPPV
TruePositive	AQV09961	1436	1443	1.65e-08	-7.78252	ALFQGPPV
TruePositive	AAQ73092	1436	1443	1.65e-08	-7.78252	ALFQGPPV
TruePositive	AUD08527	1436	1443	1.65e-08	-7.78252	ALFQGPPV
TruePositive	AJF23329	1436	1443	1.65e-08	-7.78252	ALFQGPPV
TruePositive	AUD08536	1436	1443	1.65e-08	-7.78252	ALFQGPPV
TruePositive	AUD08544	1436	1443	1.65e-08	-7.78252	ALFQGPPV
TruePositive	AUN27642	1437	1444	1.65e-08	-7.78252	ALFQGPPV
TruePositive	ALB73003	1437	1444	1.65e-08	-7.78252	ALFQGPPV
TruePositive	AAQ73085	1437	1444	1.65e-08	-7.78252	ALFQGPPV
TruePositive	AIZ97150	1437	1444	1.65e-08	-7.78252	ALFQGPPV
TruePositive	AAQ73079	1437	1444	1.65e-08	-7.78252	ALFQGPPV
TruePositive	AAQ73091	1437	1444	1.65e-08	-7.78252	ALFQGPPV
TruePositive	ADO32836	1437	1444	1.65e-08	-7.78252	ALFQGPPV
TruePositive	AAQ73081	1437	1444	1.65e-08	-7.78252	ALFQGPPV
TruePositive	AAQ73082	1438	1445	1.65e-08	-7.78252	ALFQGPPV
TruePositive	APA32000	1438	1445	1.65e-08	-7.78252	ALFQGPPV
TruePositive	AAQ73078	1438	1445	1.65e-08	-7.78252	ALFQGPPV
TruePositive	AAQ04841	1438	1445	1.65e-08	-7.78252	ALFQGPPV
TruePositive	AAW30683	1439	1446	1.65e-08	-7.78252	ALFQGPPV
TruePositive	ALU66466	1439	1446	1.65e-08	-7.78252	ALFQGPPV
TruePositive	AAX47044	1441	1448	1.65e-08	-7.78252	ALFQGPPV
TruePositive	AUF49631	1442	1449	1.65e-08	-7.78252	ALFQGPPV
TruePositive	ALB73001	1442	1449	1.65e-08	-7.78252	ALFQGPPV
TruePositive	ALB75014	1442	1449	1.65e-08	-7.78252	ALFQGPPV
TruePositive	AEK80016	1442	1449	1.65e-08	-7.78252	ALFQGPPV
TruePositive	ARB07836	1442	1449	1.65e-08	-7.78252	ALFQGPPV
TruePositive	AUF49637	1442	1449	1.65e-08	-7.78252	ALFQGPPV
TruePositive	AKE33315	1442	1449	1.65e-08	-7.78252	ALFQGPPV
TruePositive	AUF49674	1442	1449	1.65e-08	-7.78252	ALFQGPPV
TruePositive	ALB73004	1442	1449	1.65e-08	-7.78252	ALFQGPPV
TruePositive	AJD80554	1442	1449	1.65e-08	-7.78252	ALFQGPPV
TruePositive	AAW30682	1442	1449	1.65e-08	-7.78252	ALFQGPPV
TruePositive	ALB73008	1443	1450	1.65e-08	-7.78252	ALFQGPPV
TruePositive	AAQ73077	1443	1450	1.65e-08	-7.78252	ALFQGPPV
TruePositive	AUF49648	1444	1451	1.65e-08	-7.78252	ALFQGPPV
TruePositive	AUF49664	1444	1451	1.65e-08	-7.78252	ALFQGPPV
TruePositive	AGP03470	1444	1451	1.65e-08	-7.78252	ALFQGPPV
TruePositive	AUF49672	1444	1451	1.65e-08	-7.78252	ALFQGPPV
TruePositive	AAO48740	1444	1451	1.65e-08	-7.78252	ALFQGPPV
TruePositive	AAO48739	1444	1451	1.65e-08	-7.78252	ALFQGPPV
TruePositive	CAA63480	1444	1451	1.65e-08	-7.78252	ALFQGPPV
TruePositive	AGP03469	1444	1451	1.65e-08	-7.78252	ALFQGPPV
TruePositive	AOX15247	1444	1451	1.65e-08	-7.78252	ALFQGPPV
TruePositive	AFO64931	1444	1451	1.65e-08	-7.78252	ALFQGPPV
TruePositive	AFV83532	1447	1454	1.65e-08	-7.78252	ALFQGPPV
TruePositive	ADK22846	1120	1127	2.01e-08	-7.6968	AMKQGDSW
TruePositive	AAG27167	1453	1460	2.07e-08	-7.68403	ALFQGPIQ
TruePositive	BAD72853	1453	1460	2.07e-08	-7.68403	ALFQGPIQ
TruePositive	BAD72856	1453	1460	2.07e-08	-7.68403	ALFQGPIQ
TruePositive	AHZ90552	1453	1460	2.07e-08	-7.68403	ALFQGPIQ
TruePositive	AGS09871	1453	1460	2.07e-08	-7.68403	ALFQGPIQ
TruePositive	AAQ03189	1453	1460	2.07e-08	-7.68403	ALFQGPIQ
TruePositive	AAG27151	1453	1460	2.07e-08	-7.68403	ALFQGPIQ
TruePositive	AGS09865	1453	1460	2.07e-08	-7.68403	ALFQGPIQ
TruePositive	BAZ95883	1453	1460	2.07e-08	-7.68403	ALFQGPIQ
TruePositive	AGS09867	1453	1460	2.07e-08	-7.68403	ALFQGPIQ
TruePositive	AGS09870	1453	1460	2.07e-08	-7.68403	ALFQGPIQ
TruePositive	BAD72855	1453	1460	2.07e-08	-7.68403	ALFQGPIQ
TruePositive	AHZ90553	1453	1460	2.07e-08	-7.68403	ALFQGPIQ
TruePositive	BAD72854	1453	1460	2.07e-08	-7.68403	ALFQGPIQ
TruePositive	AGS09866	1453	1460	2.07e-08	-7.68403	ALFQGPIQ
TruePositive	ABU41835	1454	1461	2.07e-08	-7.68403	ALFQGPIQ
TruePositive	ABM54519	1454	1461	2.07e-08	-7.68403	ALFQGPIQ
TruePositive	AIT57556	1454	1461	2.07e-08	-7.68403	ALFQGPIQ
TruePositive	AGX93074	1454	1461	2.07e-08	-7.68403	ALFQGPIQ
TruePositive	AGX93075	1454	1461	2.07e-08	-7.68403	ALFQGPIQ
TruePositive	AIT57557	1454	1461	2.07e-08	-7.68403	ALFQGPIQ
TruePositive	ABM54520	1454	1461	2.07e-08	-7.68403	ALFQGPIQ
TruePositive	BAM71655	1458	1465	2.07e-08	-7.68403	ALFQGPIQ
TruePositive	ABM54543	1458	1465	2.07e-08	-7.68403	ALFQGPIQ
TruePositive	ABM54547	1458	1465	2.07e-08	-7.68403	ALFQGPIQ
TruePositive	ABM54545	1458	1465	2.07e-08	-7.68403	ALFQGPIQ
TruePositive	AEO78972	1458	1465	2.07e-08	-7.68403	ALFQGPIQ
TruePositive	ABD97877	1458	1465	2.07e-08	-7.68403	ALFQGPIQ
TruePositive	ANC94866	1458	1465	2.07e-08	-7.68403	ALFQGPIQ
TruePositive	ABM54544	1458	1465	2.07e-08	-7.68403	ALFQGPIQ
TruePositive	BAM71643	1458	1465	2.07e-08	-7.68403	ALFQGPIQ
TruePositive	AIM41611	1458	1465	2.07e-08	-7.68403	ALFQGPIQ
TruePositive	AHC94940	1458	1465	2.07e-08	-7.68403	ALFQGPIQ
TruePositive	BAM71653	1458	1465	2.07e-08	-7.68403	ALFQGPIQ
TruePositive	AAW72811	1458	1465	2.07e-08	-7.68403	ALFQGPIQ
TruePositive	BAM71656	1458	1465	2.07e-08	-7.68403	ALFQGPIQ
TruePositive	AEO78971	1458	1465	2.07e-08	-7.68403	ALFQGPIQ
TruePositive	BAM71654	1458	1465	2.07e-08	-7.68403	ALFQGPIQ
TruePositive	AEN25585	1458	1465	2.07e-08	-7.68403	ALFQGPIQ
TruePositive	ABM54548	1458	1465	2.07e-08	-7.68403	ALFQGPIQ
TruePositive	AEO51783	1458	1465	2.07e-08	-7.68403	ALFQGPIQ
TruePositive	ANA57368	1458	1465	2.07e-08	-7.68403	ALFQGPIQ
TruePositive	AIM41610	1458	1465	2.07e-08	-7.68403	ALFQGPIQ
TruePositive	BAM71650	1458	1465	2.07e-08	-7.68403	ALFQGPIQ
TruePositive	AEO78970	1458	1465	2.07e-08	-7.68403	ALFQGPIQ
TruePositive	AIM41612	1458	1465	2.07e-08	-7.68403	ALFQGPIQ
TruePositive	ABM54542	1458	1465	2.07e-08	-7.68403	ALFQGPIQ
TruePositive	AIM41613	1458	1465	2.07e-08	-7.68403	ALFQGPIQ
TruePositive	ABM54549	1458	1465	2.07e-08	-7.68403	ALFQGPIQ
TruePositive	ABD97876	1458	1465	2.07e-08	-7.68403	ALFQGPIQ
TruePositive	AEO78969	1458	1465	2.07e-08	-7.68403	ALFQGPIQ
TruePositive	AAW72810	1458	1465	2.07e-08	-7.68403	ALFQGPIQ
TruePositive	ANA57377	1458	1465	2.07e-08	-7.68403	ALFQGPIQ
TruePositive	ABM54546	1458	1465	2.07e-08	-7.68403	ALFQGPIQ
TruePositive	ALL26332	1462	1469	2.07e-08	-7.68403	ALFQGPIQ
TruePositive	AHF72731	1462	1469	2.07e-08	-7.68403	ALFQGPIQ
TruePositive	YP_009243645	1407	1414	2.31e-08	-7.63639	ALFQGPPE
TruePositive	ADU34211	1407	1414	2.31e-08	-7.63639	ALFQGPPE
TruePositive	BAW98047	1407	1414	2.31e-08	-7.63639	ALFQGPPE
TruePositive	AAS86317	1407	1414	2.31e-08	-7.63639	ALFQGPPE
TruePositive	BAW98045	1407	1414	2.31e-08	-7.63639	ALFQGPPE
TruePositive	AAS86318	1407	1414	2.31e-08	-7.63639	ALFQGPPE
TruePositive	AJB44634	1407	1414	2.31e-08	-7.63639	ALFQGPPE
TruePositive	AEB33908	1408	1415	2.31e-08	-7.63639	ALFQGPPE
TruePositive	YP_007985635	1408	1415	2.31e-08	-7.63639	ALFQGPPE
TruePositive	AGT57426	1408	1415	2.31e-08	-7.63639	ALFQGPPE
TruePositive	YP_009344963	1414	1421	2.31e-08	-7.63639	ALFQGPPE
TruePositive	ACF21980	1437	1444	2.31e-08	-7.63639	ALFQGPPE
TruePositive	ACK37423	1409	1416	2.63e-08	-7.58004	AIFQGPIT
TruePositive	ACK37374	1409	1416	2.63e-08	-7.58004	AIFQGPIT
TruePositive	ABF51193	1410	1417	2.63e-08	-7.58004	AIFQGPIT
TruePositive	ACK37381	1410	1417	2.63e-08	-7.58004	AIFQGPIT
TruePositive	ABO69372	1410	1417	2.63e-08	-7.58004	AIFQGPIT
TruePositive	ACK37446	1410	1417	2.63e-08	-7.58004	AIFQGPIT
TruePositive	ABF51203	1411	1418	2.63e-08	-7.58004	AIFQGPIT
TruePositive	ACK37416	1411	1418	2.63e-08	-7.58004	AIFQGPIT
TruePositive	ACK37379	1411	1418	2.63e-08	-7.58004	AIFQGPIT
TruePositive	APT69838	1411	1418	2.63e-08	-7.58004	AIFQGPIT
TruePositive	ACK37401	1412	1419	2.63e-08	-7.58004	AIFQGPIT
TruePositive	ACK37382	1413	1420	2.63e-08	-7.58004	AIFQGPIT
TruePositive	ACK37389	1413	1420	2.63e-08	-7.58004	AIFQGPIT
TruePositive	APT69837	1414	1421	2.63e-08	-7.58004	AIFQGPIT
TruePositive	APT69839	1414	1421	2.63e-08	-7.58004	AIFQGPIT
TruePositive	ACK37387	1414	1421	2.63e-08	-7.58004	AIFQGPIT
TruePositive	ARK08560	1414	1421	2.63e-08	-7.58004	AIFQGPIT
TruePositive	ACK37402	1414	1421	2.63e-08	-7.58004	AIFQGPIT
TruePositive	ACK37433	1414	1421	2.63e-08	-7.58004	AIFQGPIT
TruePositive	ACK37410	1414	1421	2.63e-08	-7.58004	AIFQGPIT
TruePositive	ACK37370	1414	1421	2.63e-08	-7.58004	AIFQGPIT
TruePositive	APT69812	1414	1421	2.63e-08	-7.58004	AIFQGPIT
TruePositive	ACK37396	1414	1421	2.63e-08	-7.58004	AIFQGPIT
TruePositive	ACU00187	1414	1421	2.63e-08	-7.58004	AIFQGPIT
TruePositive	ABF51204	1414	1421	2.63e-08	-7.58004	AIFQGPIT
TruePositive	ACK37404	1414	1421	2.63e-08	-7.58004	AIFQGPIT
TruePositive	ABF51194	1414	1421	2.63e-08	-7.58004	AIFQGPIT
TruePositive	ACK37371	1414	1421	2.63e-08	-7.58004	AIFQGPIT
TruePositive	APT69834	1414	1421	2.63e-08	-7.58004	AIFQGPIT
TruePositive	APT69828	1415	1422	2.63e-08	-7.58004	AIFQGPIT
TruePositive	ABF51192	1416	1423	2.63e-08	-7.58004	AIFQGPIT
TruePositive	AKA64451	1409	1416	3.11e-08	-7.50724	AIFQGPPE
TruePositive	AKA64452	1409	1416	3.11e-08	-7.50724	AIFQGPPE
TruePositive	ABF51206	1405	1412	3.34e-08	-7.47625	AIFQGPID
TruePositive	ABF51191	1405	1412	3.34e-08	-7.47625	AIFQGPID
TruePositive	ACK37435	1405	1412	3.34e-08	-7.47625	AIFQGPID
TruePositive	ABF51190	1406	1413	3.34e-08	-7.47625	AIFQGPID
TruePositive	APT69840	1406	1413	3.34e-08	-7.47625	AIFQGPID
TruePositive	ACK37390	1406	1413	3.34e-08	-7.47625	AIFQGPID
TruePositive	ACK37388	1408	1415	3.34e-08	-7.47625	AIFQGPID
TruePositive	APT69836	1413	1420	3.34e-08	-7.47625	AIFQGPID
TruePositive	APT69841	1413	1420	3.34e-08	-7.47625	AIFQGPID
TruePositive	ACT89356	1413	1420	3.34e-08	-7.47625	AIFQGPID
TruePositive	ACT89355	1413	1420	3.34e-08	-7.47625	AIFQGPID
TruePositive	APT69833	1413	1420	3.34e-08	-7.47625	AIFQGPID
TruePositive	APT69835	1414	1421	3.34e-08	-7.47625	AIFQGPID
TruePositive	AQX36825	1414	1421	3.34e-08	-7.47625	AIFQGPID
TruePositive	ACK37412	1417	1424	3.34e-08	-7.47625	AIFQGPID
TruePositive	ABF51202	1417	1424	3.34e-08	-7.47625	AIFQGPID
TruePositive	ABF51201	1418	1425	3.34e-08	-7.47625	AIFQGPID
TruePositive	ACK37408	1420	1427	3.34e-08	-7.47625	AIFQGPID
TruePositive	ABF51200	1420	1427	3.34e-08	-7.47625	AIFQGPID
TruePositive	ACK37392	1421	1428	3.34e-08	-7.47625	AIFQGPID
TruePositive	ACK37403	1421	1428	3.34e-08	-7.47625	AIFQGPID
TruePositive	APT69832	1422	1429	3.34e-08	-7.47625	AIFQGPID
TruePositive	APT69831	1422	1429	3.34e-08	-7.47625	AIFQGPID
TruePositive	ACK37406	1422	1429	3.34e-08	-7.47625	AIFQGPID
TruePositive	ACK37376	1422	1429	3.34e-08	-7.47625	AIFQGPID
TruePositive	ABM54528	1538	1545	4.98e-08	-7.30277	AGHQGPYT
TruePositive	ABO69374	1415	1422	5.72e-08	-7.2426	AVFQGPIT
TruePositive	ACK37439	1415	1422	5.72e-08	-7.2426	AVFQGPIT
TruePositive	AAQ02675	1447	1454	5.72e-08	-7.2426	ALFQGPIE
TruePositive	AFQ55937	1447	1454	5.72e-08	-7.2426	ALFQGPIE
TruePositive	AFQ55938	1447	1454	5.72e-08	-7.2426	ALFQGPIE
TruePositive	ABM21518	1449	1456	5.72e-08	-7.2426	ALFQGPIE
TruePositive	ABM21517	1449	1456	5.72e-08	-7.2426	ALFQGPIE
TruePositive	AER29982	1449	1456	5.72e-08	-7.2426	ALFQGPIE
TruePositive	AAQ02683	1449	1456	5.72e-08	-7.2426	ALFQGPIE
TruePositive	AAQ02681	1450	1457	5.72e-08	-7.2426	ALFQGPIE
TruePositive	AUF49622	1450	1457	5.72e-08	-7.2426	ALFQGPIE
TruePositive	ARM53611	1696	1703	6.41e-08	-7.19314	AGTQGPYT
TruePositive	ARC95293	1722	1729	6.41e-08	-7.19314	AGTQGPYT
TruePositive	ARC95292	1722	1729	6.41e-08	-7.19314	AGTQGPYT
TruePositive	ALX38427	1426	1433	7.6e-08	-7.11919	ALFQGPSV
TruePositive	CAA25246	1122	1129	8.71e-08	-7.05998	AIEQGDSW
TruePositive	ANZ02994	1508	1515	1.21e-07	-6.91721	AGFQGAYT
TruePositive	YP_003358790	1508	1515	1.21e-07	-6.91721	AGFQGAYT
TruePositive	YP_003358790	1508	1515	1.21e-07	-6.91721	AGFQGAYT
TruePositive	YP_001715611	1511	1518	1.21e-07	-6.91721	AGFQGAYT
TruePositive	YP_001715611	1511	1518	1.21e-07	-6.91721	AGFQGAYT
TruePositive	AFO64932	1512	1519	1.21e-07	-6.91721	AGFQGAYT
TruePositive	AGC54436	1512	1519	1.21e-07	-6.91721	AGFQGAYT
TruePositive	CRL46950	1512	1519	1.21e-07	-6.91721	AGFQGAYT
TruePositive	NP_040958	1512	1519	1.21e-07	-6.91721	AGFQGAYT
TruePositive	ACI23463	1512	1519	1.21e-07	-6.91721	AGFQGAYT
TruePositive	AAC00531	1512	1519	1.21e-07	-6.91721	AGFQGAYT
TruePositive	APR72754	1512	1519	1.21e-07	-6.91721	AGFQGAYT
TruePositive	ALB73000	1513	1520	1.21e-07	-6.91721	AGFQGAYT
TruePositive	ALM88626	1513	1520	1.21e-07	-6.91721	AGFQGAYT
TruePositive	AAL37156	1513	1520	1.21e-07	-6.91721	AGFQGAYT
TruePositive	APW91136	1513	1520	1.21e-07	-6.91721	AGFQGAYT
TruePositive	AAQ73094	1513	1520	1.21e-07	-6.91721	AGFQGAYT
TruePositive	APX43287	1513	1520	1.21e-07	-6.91721	AGFQGAYT
TruePositive	AUF49628	1513	1520	1.21e-07	-6.91721	AGFQGAYT
TruePositive	ATG80398	1513	1520	1.21e-07	-6.91721	AGFQGAYT
TruePositive	AHL77760	1513	1520	1.21e-07	-6.91721	AGFQGAYT
TruePositive	AAX47037	1513	1520	1.21e-07	-6.91721	AGFQGAYT
TruePositive	APT69848	1513	1520	1.21e-07	-6.91721	AGFQGAYT
TruePositive	ATV91596	1513	1520	1.21e-07	-6.91721	AGFQGAYT
TruePositive	AUO29155	1513	1520	1.21e-07	-6.91721	AGFQGAYT
TruePositive	ABF19105	1513	1520	1.21e-07	-6.91721	AGFQGAYT
TruePositive	AHL77761	1513	1520	1.21e-07	-6.91721	AGFQGAYT
TruePositive	AAQ73093	1513	1520	1.21e-07	-6.91721	AGFQGAYT
TruePositive	ANY27029	1513	1520	1.21e-07	-6.91721	AGFQGAYT
TruePositive	AUF49647	1513	1520	1.21e-07	-6.91721	AGFQGAYT
TruePositive	AHJ40480	1513	1520	1.21e-07	-6.91721	AGFQGAYT
TruePositive	CAA29172	1513	1520	1.21e-07	-6.91721	AGFQGAYT
TruePositive	ADD23216	1513	1520	1.21e-07	-6.91721	AGFQGAYT
TruePositive	AFR79234	1513	1520	1.21e-07	-6.91721	AGFQGAYT
TruePositive	AKL88020	1513	1520	1.21e-07	-6.91721	AGFQGAYT
TruePositive	AAQ73083	1513	1520	1.21e-07	-6.91721	AGFQGAYT
TruePositive	AHY03306	1513	1520	1.21e-07	-6.91721	AGFQGAYT
TruePositive	ACY40750	1514	1521	1.21e-07	-6.91721	AGFQGAYT
TruePositive	AAF12719	1514	1521	1.21e-07	-6.91721	AGFQGAYT
TruePositive	AFY09605	1514	1521	1.21e-07	-6.91721	AGFQGAYT
TruePositive	AAD02132	1514	1521	1.21e-07	-6.91721	AGFQGAYT
TruePositive	AFD32988	1514	1521	1.21e-07	-6.91721	AGFQGAYT
TruePositive	AAF21972	1514	1521	1.21e-07	-6.91721	AGFQGAYT
TruePositive	AMB57004	1515	1522	1.21e-07	-6.91721	AGFQGAYT
TruePositive	AKD28015	1515	1522	1.21e-07	-6.91721	AGFQGAYT
TruePositive	AUO29149	1515	1522	1.21e-07	-6.91721	AGFQGAYT
TruePositive	AIZ97145	1515	1522	1.21e-07	-6.91721	AGFQGAYT
TruePositive	AUO29150	1515	1522	1.21e-07	-6.91721	AGFQGAYT
TruePositive	AAV34211	1515	1522	1.21e-07	-6.91721	AGFQGAYT
TruePositive	AMY98705	1515	1522	1.21e-07	-6.91721	AGFQGAYT
TruePositive	ARB48778	1515	1522	1.21e-07	-6.91721	AGFQGAYT
TruePositive	AMB56999	1515	1522	1.21e-07	-6.91721	AGFQGAYT
TruePositive	AMB57002	1515	1522	1.21e-07	-6.91721	AGFQGAYT
TruePositive	AFO42818	1515	1522	1.21e-07	-6.91721	AGFQGAYT
TruePositive	AMB57008	1515	1522	1.21e-07	-6.91721	AGFQGAYT
TruePositive	AUF49639	1515	1522	1.21e-07	-6.91721	AGFQGAYT
TruePositive	AMB57007	1515	1522	1.21e-07	-6.91721	AGFQGAYT
TruePositive	AFD33642	1515	1522	1.21e-07	-6.91721	AGFQGAYT
TruePositive	AHK09954	1515	1522	1.21e-07	-6.91721	AGFQGAYT
TruePositive	AHM88285	1515	1522	1.21e-07	-6.91721	AGFQGAYT
TruePositive	AEH42467	1515	1522	1.21e-07	-6.91721	AGFQGAYT
TruePositive	AHY19027	1515	1522	1.21e-07	-6.91721	AGFQGAYT
TruePositive	ATV91618	1515	1522	1.21e-07	-6.91721	AGFQGAYT
TruePositive	AUF49652	1515	1522	1.21e-07	-6.91721	AGFQGAYT
TruePositive	AAG23919	1515	1522	1.21e-07	-6.91721	AGFQGAYT
TruePositive	ALX38428	1515	1522	1.21e-07	-6.91721	AGFQGAYT
TruePositive	AUF49636	1515	1522	1.21e-07	-6.91721	AGFQGAYT
TruePositive	AIZ97146	1515	1522	1.21e-07	-6.91721	AGFQGAYT
TruePositive	AUF49654	1515	1522	1.21e-07	-6.91721	AGFQGAYT
TruePositive	ACS34758	1515	1522	1.21e-07	-6.91721	AGFQGAYT
TruePositive	AFS18536	1515	1522	1.21e-07	-6.91721	AGFQGAYT
TruePositive	AUF49668	1515	1522	1.21e-07	-6.91721	AGFQGAYT
TruePositive	ACJ05389	1515	1522	1.21e-07	-6.91721	AGFQGAYT
TruePositive	AKE33317	1515	1522	1.21e-07	-6.91721	AGFQGAYT
TruePositive	AUF49657	1515	1522	1.21e-07	-6.91721	AGFQGAYT
TruePositive	AAA74400	1515	1522	1.21e-07	-6.91721	AGFQGAYT
TruePositive	AFR67087	1515	1522	1.21e-07	-6.91721	AGFQGAYT
TruePositive	ALX38426	1515	1522	1.21e-07	-6.91721	AGFQGAYT
TruePositive	AUF49642	1515	1522	1.21e-07	-6.91721	AGFQGAYT
TruePositive	AUF49643	1515	1522	1.21e-07	-6.91721	AGFQGAYT
TruePositive	AAW71476	1515	1522	1.21e-07	-6.91721	AGFQGAYT
TruePositive	CAA47944	1515	1522	1.21e-07	-6.91721	AGFQGAYT
TruePositive	AMB57000	1515	1522	1.21e-07	-6.91721	AGFQGAYT
TruePositive	AAV34212	1515	1522	1.21e-07	-6.91721	AGFQGAYT
TruePositive	ALX38425	1515	1522	1.21e-07	-6.91721	AGFQGAYT
TruePositive	AKE33319	1515	1522	1.21e-07	-6.91721	AGFQGAYT
TruePositive	ARO77489	1515	1522	1.21e-07	-6.91721	AGFQGAYT
TruePositive	AMB57006	1515	1522	1.21e-07	-6.91721	AGFQGAYT
TruePositive	AFO42817	1515	1522	1.21e-07	-6.91721	AGFQGAYT
TruePositive	ALX38427	1515	1522	1.21e-07	-6.91721	AGFQGAYT
TruePositive	AFY09604	1515	1522	1.21e-07	-6.91721	AGFQGAYT
TruePositive	AAX47040	1515	1522	1.21e-07	-6.91721	AGFQGAYT
TruePositive	AMB57005	1515	1522	1.21e-07	-6.91721	AGFQGAYT
TruePositive	AKE33318	1515	1522	1.21e-07	-6.91721	AGFQGAYT
TruePositive	AEK98148	1515	1522	1.21e-07	-6.91721	AGFQGAYT
TruePositive	AMB57003	1515	1522	1.21e-07	-6.91721	AGFQGAYT
TruePositive	AFO42819	1515	1522	1.21e-07	-6.91721	AGFQGAYT
TruePositive	BAA00337	1515	1522	1.21e-07	-6.91721	AGFQGAYT
TruePositive	ABV69564	1515	1522	1.21e-07	-6.91721	AGFQGAYT
TruePositive	AAG23918	1515	1522	1.21e-07	-6.91721	AGFQGAYT
TruePositive	AKE33316	1515	1522	1.21e-07	-6.91721	AGFQGAYT
TruePositive	AUF49630	1515	1522	1.21e-07	-6.91721	AGFQGAYT
TruePositive	AAF81252	1515	1522	1.21e-07	-6.91721	AGFQGAYT
TruePositive	AAR06974	1515	1522	1.21e-07	-6.91721	AGFQGAYT
TruePositive	ACH91034	1515	1522	1.21e-07	-6.91721	AGFQGAYT
TruePositive	AAG23920	1515	1522	1.21e-07	-6.91721	AGFQGAYT
TruePositive	AGC54437	1515	1522	1.21e-07	-6.91721	AGFQGAYT
TruePositive	AAA42931	1515	1522	1.21e-07	-6.91721	AGFQGAYT
TruePositive	AAB59927	1515	1522	1.21e-07	-6.91721	AGFQGAYT
TruePositive	AAF21971	1515	1522	1.21e-07	-6.91721	AGFQGAYT
TruePositive	AUF49632	1515	1522	1.21e-07	-6.91721	AGFQGAYT
TruePositive	AMB57001	1515	1522	1.21e-07	-6.91721	AGFQGAYT
TruePositive	AIZ97147	1515	1522	1.21e-07	-6.91721	AGFQGAYT
TruePositive	AMB56998	1515	1522	1.21e-07	-6.91721	AGFQGAYT
TruePositive	ABN49456	1515	1522	1.21e-07	-6.91721	AGFQGAYT
TruePositive	AAB02228	1515	1522	1.21e-07	-6.91721	AGFQGAYT
TruePositive	AGJ72750	1515	1522	1.21e-07	-6.91721	AGFQGAYT
TruePositive	AFO42820	1515	1522	1.21e-07	-6.91721	AGFQGAYT
TruePositive	AEX07779	1515	1522	1.21e-07	-6.91721	AGFQGAYT
TruePositive	AEH42468	1515	1522	1.21e-07	-6.91721	AGFQGAYT
TruePositive	AAT79531	1515	1522	1.21e-07	-6.91721	AGFQGAYT
TruePositive	AUF49670	1517	1524	1.21e-07	-6.91721	AGFQGAYT
TruePositive	AOW42548	1517	1524	1.21e-07	-6.91721	AGFQGAYT
TruePositive	ABM53473	1517	1524	1.21e-07	-6.91721	AGFQGAYT
TruePositive	AUF49659	1517	1524	1.21e-07	-6.91721	AGFQGAYT
TruePositive	ABM53474	1517	1524	1.21e-07	-6.91721	AGFQGAYT
TruePositive	AUF49633	1517	1524	1.21e-07	-6.91721	AGFQGAYT
TruePositive	AUF49623	1517	1524	1.21e-07	-6.91721	AGFQGAYT
TruePositive	AAD46138	1517	1524	1.21e-07	-6.91721	AGFQGAYT
TruePositive	AUF49645	1517	1524	1.21e-07	-6.91721	AGFQGAYT
TruePositive	AAK13071	1518	1525	1.21e-07	-6.91721	AGFQGAYT
TruePositive	AAQ73076	1518	1525	1.21e-07	-6.91721	AGFQGAYT
TruePositive	AAQ73097	1518	1525	1.21e-07	-6.91721	AGFQGAYT
TruePositive	AAT65951	1518	1525	1.21e-07	-6.91721	AGFQGAYT
TruePositive	AFR11453	1518	1525	1.21e-07	-6.91721	AGFQGAYT
TruePositive	AIN45139	1518	1525	1.21e-07	-6.91721	AGFQGAYT
TruePositive	AAQ73088	1518	1525	1.21e-07	-6.91721	AGFQGAYT
TruePositive	AOG61490	1519	1526	1.21e-07	-6.91721	AGFQGAYT
TruePositive	ANP43766	1519	1526	1.21e-07	-6.91721	AGFQGAYT
TruePositive	ANP43758	1519	1526	1.21e-07	-6.91721	AGFQGAYT
TruePositive	AUF49629	1519	1526	1.21e-07	-6.91721	AGFQGAYT
TruePositive	ANP43754	1519	1526	1.21e-07	-6.91721	AGFQGAYT
TruePositive	ANP43764	1519	1526	1.21e-07	-6.91721	AGFQGAYT
TruePositive	ADO32837	1519	1526	1.21e-07	-6.91721	AGFQGAYT
TruePositive	ANP43755	1519	1526	1.21e-07	-6.91721	AGFQGAYT
TruePositive	ANP43763	1519	1526	1.21e-07	-6.91721	AGFQGAYT
TruePositive	AAX47043	1519	1526	1.21e-07	-6.91721	AGFQGAYT
TruePositive	ANP43759	1519	1526	1.21e-07	-6.91721	AGFQGAYT
TruePositive	ANP43757	1519	1526	1.21e-07	-6.91721	AGFQGAYT
TruePositive	AGU38786	1519	1526	1.21e-07	-6.91721	AGFQGAYT
TruePositive	ASU64357	1519	1526	1.21e-07	-6.91721	AGFQGAYT
TruePositive	ANP43761	1519	1526	1.21e-07	-6.91721	AGFQGAYT
TruePositive	ANP43765	1519	1526	1.21e-07	-6.91721	AGFQGAYT
TruePositive	BAG70422	1519	1526	1.21e-07	-6.91721	AGFQGAYT
TruePositive	ANP43760	1519	1526	1.21e-07	-6.91721	AGFQGAYT
TruePositive	ANP43762	1519	1526	1.21e-07	-6.91721	AGFQGAYT
TruePositive	ASU64358	1519	1526	1.21e-07	-6.91721	AGFQGAYT
TruePositive	AAX47038	1520	1527	1.21e-07	-6.91721	AGFQGAYT
TruePositive	AAQ73080	1520	1527	1.21e-07	-6.91721	AGFQGAYT
TruePositive	CAD38168	1520	1527	1.21e-07	-6.91721	AGFQGAYT
TruePositive	AFK29633	1521	1528	1.21e-07	-6.91721	AGFQGAYT
TruePositive	AMD82550	1521	1528	1.21e-07	-6.91721	AGFQGAYT
TruePositive	BAM44536	1521	1528	1.21e-07	-6.91721	AGFQGAYT
TruePositive	AGV00138	1521	1528	1.21e-07	-6.91721	AGFQGAYT
TruePositive	AGV00137	1521	1528	1.21e-07	-6.91721	AGFQGAYT
TruePositive	AAQ04840	1521	1528	1.21e-07	-6.91721	AGFQGAYT
TruePositive	BAM44537	1521	1528	1.21e-07	-6.91721	AGFQGAYT
TruePositive	AKE33309	1521	1528	1.21e-07	-6.91721	AGFQGAYT
TruePositive	ADM83416	1521	1528	1.21e-07	-6.91721	AGFQGAYT
TruePositive	ARF07867	1521	1528	1.21e-07	-6.91721	AGFQGAYT
TruePositive	AIK66522	1521	1528	1.21e-07	-6.91721	AGFQGAYT
TruePositive	ARR74572	1521	1528	1.21e-07	-6.91721	AGFQGAYT
TruePositive	ABK41189	1521	1528	1.21e-07	-6.91721	AGFQGAYT
TruePositive	AAX47035	1521	1528	1.21e-07	-6.91721	AGFQGAYT
TruePositive	AUF49635	1521	1528	1.21e-07	-6.91721	AGFQGAYT
TruePositive	AGC54438	1521	1528	1.21e-07	-6.91721	AGFQGAYT
TruePositive	BAM44538	1521	1528	1.21e-07	-6.91721	AGFQGAYT
TruePositive	ALB73006	1521	1528	1.21e-07	-6.91721	AGFQGAYT
TruePositive	AIK66521	1521	1528	1.21e-07	-6.91721	AGFQGAYT
TruePositive	AFO83469	1521	1528	1.21e-07	-6.91721	AGFQGAYT
TruePositive	AMD82549	1521	1528	1.21e-07	-6.91721	AGFQGAYT
TruePositive	AAA65044	1521	1528	1.21e-07	-6.91721	AGFQGAYT
TruePositive	BAM44539	1521	1528	1.21e-07	-6.91721	AGFQGAYT
TruePositive	ADM83417	1521	1528	1.21e-07	-6.91721	AGFQGAYT
TruePositive	AUO29156	1521	1528	1.21e-07	-6.91721	AGFQGAYT
TruePositive	AAQ73095	1521	1528	1.21e-07	-6.91721	AGFQGAYT
TruePositive	AGC03214	1522	1529	1.21e-07	-6.91721	AGFQGAYT
TruePositive	ABK41188	1522	1529	1.21e-07	-6.91721	AGFQGAYT
TruePositive	AAX47041	1522	1529	1.21e-07	-6.91721	AGFQGAYT
TruePositive	AGN90901	1522	1529	1.21e-07	-6.91721	AGFQGAYT
TruePositive	APZ85757	1522	1529	1.21e-07	-6.91721	AGFQGAYT
TruePositive	AAX47039	1522	1529	1.21e-07	-6.91721	AGFQGAYT
TruePositive	AGC03216	1522	1529	1.21e-07	-6.91721	AGFQGAYT
TruePositive	APZ85756	1522	1529	1.21e-07	-6.91721	AGFQGAYT
TruePositive	APZ85755	1522	1529	1.21e-07	-6.91721	AGFQGAYT
TruePositive	BAG70420	1522	1529	1.21e-07	-6.91721	AGFQGAYT
TruePositive	AGC03215	1522	1529	1.21e-07	-6.91721	AGFQGAYT
TruePositive	AGC03213	1522	1529	1.21e-07	-6.91721	AGFQGAYT
TruePositive	AFU93430	1522	1529	1.21e-07	-6.91721	AGFQGAYT
TruePositive	APZ85758	1522	1529	1.21e-07	-6.91721	AGFQGAYT
TruePositive	AKL71247	1522	1529	1.21e-07	-6.91721	AGFQGAYT
TruePositive	CAA54783	1523	1530	1.21e-07	-6.91721	AGFQGAYT
TruePositive	AAQ73087	1523	1530	1.21e-07	-6.91721	AGFQGAYT
TruePositive	AAT65964	1523	1530	1.21e-07	-6.91721	AGFQGAYT
TruePositive	CAA55650	1523	1530	1.21e-07	-6.91721	AGFQGAYT
TruePositive	CAA59341	1523	1530	1.21e-07	-6.91721	AGFQGAYT
TruePositive	AIN45140	1523	1530	1.21e-07	-6.91721	AGFQGAYT
TruePositive	AAQ04839	1524	1531	1.21e-07	-6.91721	AGFQGAYT
TruePositive	AUF49626	1524	1531	1.21e-07	-6.91721	AGFQGAYT
TruePositive	AUO29153	1524	1531	1.21e-07	-6.91721	AGFQGAYT
TruePositive	BAK57450	1524	1531	1.21e-07	-6.91721	AGFQGAYT
TruePositive	AKA43773	1524	1531	1.21e-07	-6.91721	AGFQGAYT
TruePositive	AUF49651	1524	1531	1.21e-07	-6.91721	AGFQGAYT
TruePositive	AGC54439	1524	1531	1.21e-07	-6.91721	AGFQGAYT
TruePositive	BAG70421	1524	1531	1.21e-07	-6.91721	AGFQGAYT
TruePositive	ASZ69778	1524	1531	1.21e-07	-6.91721	AGFQGAYT
TruePositive	AAK85711	1524	1531	1.21e-07	-6.91721	AGFQGAYT
TruePositive	AUF49625	1524	1531	1.21e-07	-6.91721	AGFQGAYT
TruePositive	BAK57449	1524	1531	1.21e-07	-6.91721	AGFQGAYT
TruePositive	AVI05001	1524	1531	1.21e-07	-6.91721	AGFQGAYT
TruePositive	CAH61520	1524	1531	1.21e-07	-6.91721	AGFQGAYT
TruePositive	AUO29151	1524	1531	1.21e-07	-6.91721	AGFQGAYT
TruePositive	AMK74873	1524	1531	1.21e-07	-6.91721	AGFQGAYT
TruePositive	AVI04999	1524	1531	1.21e-07	-6.91721	AGFQGAYT
TruePositive	AVM86035	1524	1531	1.21e-07	-6.91721	AGFQGAYT
TruePositive	AAQ73096	1524	1531	1.21e-07	-6.91721	AGFQGAYT
TruePositive	AIY58060	1524	1531	1.21e-07	-6.91721	AGFQGAYT
TruePositive	AVM86033	1524	1531	1.21e-07	-6.91721	AGFQGAYT
TruePositive	AUF49676	1524	1531	1.21e-07	-6.91721	AGFQGAYT
TruePositive	AFY23012	1524	1531	1.21e-07	-6.91721	AGFQGAYT
TruePositive	AMD82545	1524	1531	1.21e-07	-6.91721	AGFQGAYT
TruePositive	AAX47033	1524	1531	1.21e-07	-6.91721	AGFQGAYT
TruePositive	AJR20996	1524	1531	1.21e-07	-6.91721	AGFQGAYT
TruePositive	BAK57446	1524	1531	1.21e-07	-6.91721	AGFQGAYT
TruePositive	AIG92834	1524	1531	1.21e-07	-6.91721	AGFQGAYT
TruePositive	ABF82247	1524	1531	1.21e-07	-6.91721	AGFQGAYT
TruePositive	AKE33312	1524	1531	1.21e-07	-6.91721	AGFQGAYT
TruePositive	AAQ73086	1524	1531	1.21e-07	-6.91721	AGFQGAYT
TruePositive	AAQ73090	1524	1531	1.21e-07	-6.91721	AGFQGAYT
TruePositive	BAK57451	1524	1531	1.21e-07	-6.91721	AGFQGAYT
TruePositive	AAX47034	1524	1531	1.21e-07	-6.91721	AGFQGAYT
TruePositive	AVM86034	1524	1531	1.21e-07	-6.91721	AGFQGAYT
TruePositive	BAK57456	1524	1531	1.21e-07	-6.91721	AGFQGAYT
TruePositive	AUF49644	1524	1531	1.21e-07	-6.91721	AGFQGAYT
TruePositive	AHJ14762	1524	1531	1.21e-07	-6.91721	AGFQGAYT
TruePositive	AVM86032	1524	1531	1.21e-07	-6.91721	AGFQGAYT
TruePositive	AFA26358	1524	1531	1.21e-07	-6.91721	AGFQGAYT
TruePositive	ASU43933	1524	1531	1.21e-07	-6.91721	AGFQGAYT
TruePositive	AGS38339	1524	1531	1.21e-07	-6.91721	AGFQGAYT
TruePositive	AVM86030	1524	1531	1.21e-07	-6.91721	AGFQGAYT
TruePositive	BAK57452	1524	1531	1.21e-07	-6.91721	AGFQGAYT
TruePositive	BAK57454	1524	1531	1.21e-07	-6.91721	AGFQGAYT
TruePositive	AVI05000	1524	1531	1.21e-07	-6.91721	AGFQGAYT
TruePositive	BAK57448	1524	1531	1.21e-07	-6.91721	AGFQGAYT
TruePositive	ARB07388	1524	1531	1.21e-07	-6.91721	AGFQGAYT
TruePositive	AAQ73084	1524	1531	1.21e-07	-6.91721	AGFQGAYT
TruePositive	AKE33310	1524	1531	1.21e-07	-6.91721	AGFQGAYT
TruePositive	ANP43768	1524	1531	1.21e-07	-6.91721	AGFQGAYT
TruePositive	AHE93351	1524	1531	1.21e-07	-6.91721	AGFQGAYT
TruePositive	AAQ73089	1524	1531	1.21e-07	-6.91721	AGFQGAYT
TruePositive	BAK57455	1524	1531	1.21e-07	-6.91721	AGFQGAYT
TruePositive	AAK85710	1524	1531	1.21e-07	-6.91721	AGFQGAYT
TruePositive	ADG63656	1524	1531	1.21e-07	-6.91721	AGFQGAYT
TruePositive	AUF49624	1524	1531	1.21e-07	-6.91721	AGFQGAYT
TruePositive	AGC54440	1524	1531	1.21e-07	-6.91721	AGFQGAYT
TruePositive	AUO29157	1524	1531	1.21e-07	-6.91721	AGFQGAYT
TruePositive	AUF49663	1524	1531	1.21e-07	-6.91721	AGFQGAYT
TruePositive	AUO29152	1524	1531	1.21e-07	-6.91721	AGFQGAYT
TruePositive	BAK57453	1524	1531	1.21e-07	-6.91721	AGFQGAYT
TruePositive	ANP43767	1524	1531	1.21e-07	-6.91721	AGFQGAYT
TruePositive	AMD82548	1524	1531	1.21e-07	-6.91721	AGFQGAYT
TruePositive	AUD08541	1525	1532	1.21e-07	-6.91721	AGFQGAYT
TruePositive	AAX47036	1525	1532	1.21e-07	-6.91721	AGFQGAYT
TruePositive	AUD08544	1525	1532	1.21e-07	-6.91721	AGFQGAYT
TruePositive	AUD08547	1525	1532	1.21e-07	-6.91721	AGFQGAYT
TruePositive	AUD08524	1525	1532	1.21e-07	-6.91721	AGFQGAYT
TruePositive	AUD08536	1525	1532	1.21e-07	-6.91721	AGFQGAYT
TruePositive	AAX47042	1525	1532	1.21e-07	-6.91721	AGFQGAYT
TruePositive	AUD08532	1525	1532	1.21e-07	-6.91721	AGFQGAYT
TruePositive	AUD08531	1525	1532	1.21e-07	-6.91721	AGFQGAYT
TruePositive	AUD08530	1525	1532	1.21e-07	-6.91721	AGFQGAYT
TruePositive	AUD08525	1525	1532	1.21e-07	-6.91721	AGFQGAYT
TruePositive	AUD08523	1525	1532	1.21e-07	-6.91721	AGFQGAYT
TruePositive	AUD08543	1525	1532	1.21e-07	-6.91721	AGFQGAYT
TruePositive	AUD08546	1525	1532	1.21e-07	-6.91721	AGFQGAYT
TruePositive	AUD08535	1525	1532	1.21e-07	-6.91721	AGFQGAYT
TruePositive	AUD08538	1525	1532	1.21e-07	-6.91721	AGFQGAYT
TruePositive	AAQ73092	1525	1532	1.21e-07	-6.91721	AGFQGAYT
TruePositive	CAE12182	1525	1532	1.21e-07	-6.91721	AGFQGAYT
TruePositive	AUD08540	1525	1532	1.21e-07	-6.91721	AGFQGAYT
TruePositive	AQV09961	1525	1532	1.21e-07	-6.91721	AGFQGAYT
TruePositive	AJF23329	1525	1532	1.21e-07	-6.91721	AGFQGAYT
TruePositive	CAA56365	1525	1532	1.21e-07	-6.91721	AGFQGAYT
TruePositive	CAE12177	1525	1532	1.21e-07	-6.91721	AGFQGAYT
TruePositive	ABV00677	1525	1532	1.21e-07	-6.91721	AGFQGAYT
TruePositive	AUD08542	1525	1532	1.21e-07	-6.91721	AGFQGAYT
TruePositive	AUD08537	1525	1532	1.21e-07	-6.91721	AGFQGAYT
TruePositive	AUD08539	1525	1532	1.21e-07	-6.91721	AGFQGAYT
TruePositive	CAC82172	1525	1532	1.21e-07	-6.91721	AGFQGAYT
TruePositive	AUD08528	1525	1532	1.21e-07	-6.91721	AGFQGAYT
TruePositive	AUD08526	1525	1532	1.21e-07	-6.91721	AGFQGAYT
TruePositive	CAE12178	1525	1532	1.21e-07	-6.91721	AGFQGAYT
TruePositive	AUD08545	1525	1532	1.21e-07	-6.91721	AGFQGAYT
TruePositive	AUD08527	1525	1532	1.21e-07	-6.91721	AGFQGAYT
TruePositive	AUD08529	1525	1532	1.21e-07	-6.91721	AGFQGAYT
TruePositive	AUD08533	1525	1532	1.21e-07	-6.91721	AGFQGAYT
TruePositive	AUN27642	1526	1533	1.21e-07	-6.91721	AGFQGAYT
TruePositive	AAQ73085	1526	1533	1.21e-07	-6.91721	AGFQGAYT
TruePositive	ALB73003	1526	1533	1.21e-07	-6.91721	AGFQGAYT
TruePositive	AAD19342	1526	1533	1.21e-07	-6.91721	AGFQGAYT
TruePositive	AAQ73081	1526	1533	1.21e-07	-6.91721	AGFQGAYT
TruePositive	ADO32836	1526	1533	1.21e-07	-6.91721	AGFQGAYT
TruePositive	AAQ73091	1526	1533	1.21e-07	-6.91721	AGFQGAYT
TruePositive	AAQ73079	1526	1533	1.21e-07	-6.91721	AGFQGAYT
TruePositive	AAQ04841	1527	1534	1.21e-07	-6.91721	AGFQGAYT
TruePositive	AAQ73082	1527	1534	1.21e-07	-6.91721	AGFQGAYT
TruePositive	AAQ73078	1527	1534	1.21e-07	-6.91721	AGFQGAYT
TruePositive	APA32000	1527	1534	1.21e-07	-6.91721	AGFQGAYT
TruePositive	AAX47044	1530	1537	1.21e-07	-6.91721	AGFQGAYT
TruePositive	ALB73001	1531	1538	1.21e-07	-6.91721	AGFQGAYT
TruePositive	ARB07836	1531	1538	1.21e-07	-6.91721	AGFQGAYT
TruePositive	AUF49637	1531	1538	1.21e-07	-6.91721	AGFQGAYT
TruePositive	AUF49658	1531	1538	1.21e-07	-6.91721	AGFQGAYT
TruePositive	AUF49674	1531	1538	1.21e-07	-6.91721	AGFQGAYT
TruePositive	AMD82546	1531	1538	1.21e-07	-6.91721	AGFQGAYT
TruePositive	AUF49631	1531	1538	1.21e-07	-6.91721	AGFQGAYT
TruePositive	AKE33315	1531	1538	1.21e-07	-6.91721	AGFQGAYT
TruePositive	AJD80554	1531	1538	1.21e-07	-6.91721	AGFQGAYT
TruePositive	ALB75014	1531	1538	1.21e-07	-6.91721	AGFQGAYT
TruePositive	BAA00518	1531	1538	1.21e-07	-6.91721	AGFQGAYT
TruePositive	AJD80555	1531	1538	1.21e-07	-6.91721	AGFQGAYT
TruePositive	ALB73004	1531	1538	1.21e-07	-6.91721	AGFQGAYT
TruePositive	ALB73007	1532	1539	1.21e-07	-6.91721	AGFQGAYT
TruePositive	ALB73008	1532	1539	1.21e-07	-6.91721	AGFQGAYT
TruePositive	AAQ73077	1532	1539	1.21e-07	-6.91721	AGFQGAYT
TruePositive	AOX15247	1533	1540	1.21e-07	-6.91721	AGFQGAYT
TruePositive	CAA63480	1533	1540	1.21e-07	-6.91721	AGFQGAYT
TruePositive	AUF49672	1533	1540	1.21e-07	-6.91721	AGFQGAYT
TruePositive	AFO64931	1533	1540	1.21e-07	-6.91721	AGFQGAYT
TruePositive	AUF49648	1533	1540	1.21e-07	-6.91721	AGFQGAYT
TruePositive	AAO48740	1533	1540	1.21e-07	-6.91721	AGFQGAYT
TruePositive	AGP03469	1533	1540	1.21e-07	-6.91721	AGFQGAYT
TruePositive	AAO48739	1533	1540	1.21e-07	-6.91721	AGFQGAYT
TruePositive	AGP03470	1533	1540	1.21e-07	-6.91721	AGFQGAYT
TruePositive	AUF49664	1533	1540	1.21e-07	-6.91721	AGFQGAYT
TruePositive	AFQ55938	1535	1542	1.21e-07	-6.91721	AGFQGAYT
TruePositive	AFQ55937	1535	1542	1.21e-07	-6.91721	AGFQGAYT
TruePositive	AAQ02675	1535	1542	1.21e-07	-6.91721	AGFQGAYT
TruePositive	AFV83532	1536	1543	1.21e-07	-6.91721	AGFQGAYT
TruePositive	AER29982	1537	1544	1.21e-07	-6.91721	AGFQGAYT
TruePositive	ABM21517	1537	1544	1.21e-07	-6.91721	AGFQGAYT
TruePositive	ABM21518	1537	1544	1.21e-07	-6.91721	AGFQGAYT
TruePositive	AAQ02683	1537	1544	1.21e-07	-6.91721	AGFQGAYT
TruePositive	AUF49622	1538	1545	1.21e-07	-6.91721	AGFQGAYT
TruePositive	AAQ02681	1538	1545	1.21e-07	-6.91721	AGFQGAYT
TruePositive	ACT31465	1550	1557	1.21e-07	-6.91721	AGFQGAYT
TruePositive	ABM54550	1550	1557	1.21e-07	-6.91721	AGFQGAYT
TruePositive	AUD09292	1024	1031	1.42e-07	-6.84771	AMEQGISD
TruePositive	ANV28237	1027	1034	1.42e-07	-6.84771	AMEQGISD
TruePositive	AEK77620	1009	1016	1.46e-07	-6.83565	AMEQGASD
TruePositive	YP_009246449	1523	1530	1.5e-07	-6.82391	AGFQGPYN
TruePositive	AAQ02680	1458	1465	1.54e-07	-6.81248	ALFQGPIS
TruePositive	ACK37391	1409	1416	1.95e-07	-6.70997	AIFQGPIS
TruePositive	APQ46501	1409	1416	1.95e-07	-6.70997	AIFQGPIS
TruePositive	ACK37414	1409	1416	1.95e-07	-6.70997	AIFQGPIS
TruePositive	ACK37413	1409	1416	1.95e-07	-6.70997	AIFQGPIS
TruePositive	ACK37415	1409	1416	1.95e-07	-6.70997	AIFQGPIS
TruePositive	ABF51195	1409	1416	1.95e-07	-6.70997	AIFQGPIS
TruePositive	ACK37445	1409	1416	1.95e-07	-6.70997	AIFQGPIS
TruePositive	ABO69370	1409	1416	1.95e-07	-6.70997	AIFQGPIS
TruePositive	APT69810	1409	1416	1.95e-07	-6.70997	AIFQGPIS
TruePositive	ABF51196	1411	1418	1.95e-07	-6.70997	AIFQGPIS
TruePositive	ACK37384	1411	1418	1.95e-07	-6.70997	AIFQGPIS
TruePositive	ACK37438	1411	1418	1.95e-07	-6.70997	AIFQGPIS
TruePositive	ABF51205	1411	1418	1.95e-07	-6.70997	AIFQGPIS
TruePositive	ABO69373	1412	1419	1.95e-07	-6.70997	AIFQGPIS
TruePositive	ACK37437	1412	1419	1.95e-07	-6.70997	AIFQGPIS
TruePositive	APU57649	1412	1419	1.95e-07	-6.70997	AIFQGPIS
TruePositive	ABO69371	1412	1419	1.95e-07	-6.70997	AIFQGPIS
TruePositive	ACK37441	1412	1419	1.95e-07	-6.70997	AIFQGPIS
TruePositive	APT69811	1412	1419	1.95e-07	-6.70997	AIFQGPIS
TruePositive	ACK37378	1412	1419	1.95e-07	-6.70997	AIFQGPIS
TruePositive	ABF51188	1412	1419	1.95e-07	-6.70997	AIFQGPIS
TruePositive	ABO69375	1412	1419	1.95e-07	-6.70997	AIFQGPIS
TruePositive	ACK37397	1413	1420	1.95e-07	-6.70997	AIFQGPIS
TruePositive	AVK92956	1413	1420	1.95e-07	-6.70997	AIFQGPIS
TruePositive	ACK37377	1413	1420	1.95e-07	-6.70997	AIFQGPIS
TruePositive	BAA00168	1413	1420	1.95e-07	-6.70997	AIFQGPIS
TruePositive	AOL02449	1413	1420	1.95e-07	-6.70997	AIFQGPIS
TruePositive	ATZ76015	1413	1420	1.95e-07	-6.70997	AIFQGPIS
TruePositive	AKH49408	1413	1420	1.95e-07	-6.70997	AIFQGPIS
TruePositive	AMK37996	1413	1420	1.95e-07	-6.70997	AIFQGPIS
TruePositive	ACK37427	1413	1420	1.95e-07	-6.70997	AIFQGPIS
TruePositive	AAV27300	1413	1420	1.95e-07	-6.70997	AIFQGPIS
TruePositive	ACK37367	1413	1420	1.95e-07	-6.70997	AIFQGPIS
TruePositive	APT69842	1413	1420	1.95e-07	-6.70997	AIFQGPIS
TruePositive	ATZ76014	1413	1420	1.95e-07	-6.70997	AIFQGPIS
TruePositive	ACK37375	1414	1421	1.95e-07	-6.70997	AIFQGPIS
TruePositive	ACK37383	1414	1421	1.95e-07	-6.70997	AIFQGPIS
TruePositive	ACK37394	1414	1421	1.95e-07	-6.70997	AIFQGPIS
TruePositive	ACK37395	1414	1421	1.95e-07	-6.70997	AIFQGPIS
TruePositive	ACK37405	1414	1421	1.95e-07	-6.70997	AIFQGPIS
TruePositive	ACK37429	1414	1421	1.95e-07	-6.70997	AIFQGPIS
TruePositive	ACK37399	1415	1422	1.95e-07	-6.70997	AIFQGPIS
TruePositive	ABF51189	1415	1422	1.95e-07	-6.70997	AIFQGPIS
TruePositive	ACK37419	1415	1422	1.95e-07	-6.70997	AIFQGPIS
TruePositive	ACK37436	1415	1422	1.95e-07	-6.70997	AIFQGPIS
TruePositive	APT69829	1415	1422	1.95e-07	-6.70997	AIFQGPIS
TruePositive	ABF51187	1415	1422	1.95e-07	-6.70997	AIFQGPIS
TruePositive	ACK37385	1415	1422	1.95e-07	-6.70997	AIFQGPIS
TruePositive	ABF51186	1416	1423	1.95e-07	-6.70997	AIFQGPIS
TruePositive	ACK37400	1416	1423	1.95e-07	-6.70997	AIFQGPIS
TruePositive	ACK37373	1416	1423	1.95e-07	-6.70997	AIFQGPIS
TruePositive	ACK37431	1416	1423	1.95e-07	-6.70997	AIFQGPIS
TruePositive	APT69830	1416	1423	1.95e-07	-6.70997	AIFQGPIS
TruePositive	ACK37372	1416	1423	1.95e-07	-6.70997	AIFQGPIS
TruePositive	ABF51185	1417	1424	1.95e-07	-6.70997	AIFQGPIS
TruePositive	AIA21703	1410	1417	2.48e-07	-6.60555	ALFQGAPV
TruePositive	AAC00531	1423	1430	2.54e-07	-6.59517	ALFQGPPI
TruePositive	AFO64932	1423	1430	2.54e-07	-6.59517	ALFQGPPI
TruePositive	NP_040958	1423	1430	2.54e-07	-6.59517	ALFQGPPI
TruePositive	YP_001715611	1424	1431	2.54e-07	-6.59517	ALFQGPPI
TruePositive	YP_001715611	1424	1431	2.54e-07	-6.59517	ALFQGPPI
TruePositive	AAX47037	1424	1431	2.54e-07	-6.59517	ALFQGPPI
TruePositive	AAL37156	1424	1431	2.54e-07	-6.59517	ALFQGPPI
TruePositive	AFR67087	1426	1433	2.54e-07	-6.59517	ALFQGPPI
TruePositive	AFY09604	1426	1433	2.54e-07	-6.59517	ALFQGPPI
TruePositive	CAA47944	1426	1433	2.54e-07	-6.59517	ALFQGPPI
TruePositive	ALX38428	1426	1433	2.54e-07	-6.59517	ALFQGPPI
TruePositive	ABM53474	1428	1435	2.54e-07	-6.59517	ALFQGPPI
TruePositive	AAD46138	1428	1435	2.54e-07	-6.59517	ALFQGPPI
TruePositive	ABM53473	1428	1435	2.54e-07	-6.59517	ALFQGPPI
TruePositive	AOW42548	1428	1435	2.54e-07	-6.59517	ALFQGPPI
TruePositive	AAQ73097	1429	1436	2.54e-07	-6.59517	ALFQGPPI
TruePositive	AOG61490	1430	1437	2.54e-07	-6.59517	ALFQGPPI
TruePositive	ADM83417	1432	1439	2.54e-07	-6.59517	ALFQGPPI
TruePositive	ADM83416	1432	1439	2.54e-07	-6.59517	ALFQGPPI
TruePositive	CAA59341	1434	1441	2.54e-07	-6.59517	ALFQGPPI
TruePositive	AAK85710	1435	1442	2.54e-07	-6.59517	ALFQGPPI
TruePositive	ANP43767	1435	1442	2.54e-07	-6.59517	ALFQGPPI
TruePositive	AMK74873	1435	1442	2.54e-07	-6.59517	ALFQGPPI
TruePositive	AKE33310	1435	1442	2.54e-07	-6.59517	ALFQGPPI
TruePositive	AVM86034	1435	1442	2.54e-07	-6.59517	ALFQGPPI
TruePositive	ANP43768	1435	1442	2.54e-07	-6.59517	ALFQGPPI
TruePositive	AUD08543	1436	1443	2.54e-07	-6.59517	ALFQGPPI
TruePositive	CAA56365	1436	1443	2.54e-07	-6.59517	ALFQGPPI
TruePositive	AUD08547	1436	1443	2.54e-07	-6.59517	ALFQGPPI
TruePositive	AUD08546	1436	1443	2.54e-07	-6.59517	ALFQGPPI
TruePositive	AUD08530	1436	1443	2.54e-07	-6.59517	ALFQGPPI
TruePositive	AUD08540	1436	1443	2.54e-07	-6.59517	ALFQGPPI
TruePositive	ABV00677	1436	1443	2.54e-07	-6.59517	ALFQGPPI
TruePositive	CAE12182	1436	1443	2.54e-07	-6.59517	ALFQGPPI
TruePositive	AUD08542	1436	1443	2.54e-07	-6.59517	ALFQGPPI
TruePositive	AUD08545	1436	1443	2.54e-07	-6.59517	ALFQGPPI
TruePositive	AUD08529	1436	1443	2.54e-07	-6.59517	ALFQGPPI
TruePositive	AUD08539	1436	1443	2.54e-07	-6.59517	ALFQGPPI
TruePositive	CAE12178	1436	1443	2.54e-07	-6.59517	ALFQGPPI
TruePositive	ALB72963	1437	1444	2.54e-07	-6.59517	ALFQGPPI
TruePositive	BAA00518	1442	1449	2.54e-07	-6.59517	ALFQGPPI
TruePositive	ASZ70601	1075	1082	2.61e-07	-6.58336	AKKQGDSW
TruePositive	AHG06624	1417	1424	2.61e-07	-6.58336	ALFQGPVT
TruePositive	AQM32742	871	878	2.67e-07	-6.57349	AMEQGVSD
TruePositive	YP_003358790	993	1000	2.67e-07	-6.57349	AMEQGVSD
TruePositive	YP_003358790	993	1000	2.67e-07	-6.57349	AMEQGVSD
TruePositive	YP_009259673	1003	1010	2.67e-07	-6.57349	AMEQGVSD
TruePositive	AJC11329	1005	1012	2.67e-07	-6.57349	AMEQGVSD
TruePositive	AAR38841	1005	1012	2.67e-07	-6.57349	AMEQGVSD
TruePositive	AJC11328	1005	1012	2.67e-07	-6.57349	AMEQGVSD
TruePositive	AAR38846	1005	1012	2.67e-07	-6.57349	AMEQGVSD
TruePositive	AJC11330	1005	1012	2.67e-07	-6.57349	AMEQGVSD
TruePositive	AKR53677	1005	1012	2.67e-07	-6.57349	AMEQGVSD
TruePositive	AJC11325	1005	1012	2.67e-07	-6.57349	AMEQGVSD
TruePositive	AJC11326	1005	1012	2.67e-07	-6.57349	AMEQGVSD
TruePositive	ALB73002	1005	1012	2.67e-07	-6.57349	AMEQGVSD
TruePositive	AJC11327	1005	1012	2.67e-07	-6.57349	AMEQGVSD
TruePositive	AEJ54592	1006	1013	2.67e-07	-6.57349	AMEQGVSD
TruePositive	ANQ47258	1006	1013	2.67e-07	-6.57349	AMEQGVSD
TruePositive	AUF49666	1006	1013	2.67e-07	-6.57349	AMEQGVSD
TruePositive	AUF49650	1006	1013	2.67e-07	-6.57349	AMEQGVSD
TruePositive	ALB72928	1006	1013	2.67e-07	-6.57349	AMEQGVSD
TruePositive	ARU09498	1006	1013	2.67e-07	-6.57349	AMEQGVSD
TruePositive	APA31999	1006	1013	2.67e-07	-6.57349	AMEQGVSD
TruePositive	ARU09499	1006	1013	2.67e-07	-6.57349	AMEQGVSD
TruePositive	AUF49638	1006	1013	2.67e-07	-6.57349	AMEQGVSD
TruePositive	AUF49662	1006	1013	2.67e-07	-6.57349	AMEQGVSD
TruePositive	ALB72924	1006	1013	2.67e-07	-6.57349	AMEQGVSD
TruePositive	ARU09501	1006	1013	2.67e-07	-6.57349	AMEQGVSD
TruePositive	ALB72926	1006	1013	2.67e-07	-6.57349	AMEQGVSD
TruePositive	ALB72925	1006	1013	2.67e-07	-6.57349	AMEQGVSD
TruePositive	AAR38840	1006	1013	2.67e-07	-6.57349	AMEQGVSD
TruePositive	AUF49661	1006	1013	2.67e-07	-6.57349	AMEQGVSD
TruePositive	ANQ47259	1006	1013	2.67e-07	-6.57349	AMEQGVSD
TruePositive	ALB72930	1007	1014	2.67e-07	-6.57349	AMEQGVSD
TruePositive	AAR38843	1007	1014	2.67e-07	-6.57349	AMEQGVSD
TruePositive	ALB72929	1007	1014	2.67e-07	-6.57349	AMEQGVSD
TruePositive	AAR38848	1007	1014	2.67e-07	-6.57349	AMEQGVSD
TruePositive	AEJ54594	1007	1014	2.67e-07	-6.57349	AMEQGVSD
TruePositive	ALB72931	1007	1014	2.67e-07	-6.57349	AMEQGVSD
TruePositive	AOR57086	1007	1014	2.67e-07	-6.57349	AMEQGVSD
TruePositive	AIE89767	1007	1014	2.67e-07	-6.57349	AMEQGVSD
TruePositive	AIE89768	1007	1014	2.67e-07	-6.57349	AMEQGVSD
TruePositive	CDQ47775	1007	1014	2.67e-07	-6.57349	AMEQGVSD
TruePositive	AGC23343	1008	1015	2.67e-07	-6.57349	AMEQGVSD
TruePositive	AIZ97148	1008	1015	2.67e-07	-6.57349	AMEQGVSD
TruePositive	AFD32987	1008	1015	2.67e-07	-6.57349	AMEQGVSD
TruePositive	AAR38849	1008	1015	2.67e-07	-6.57349	AMEQGVSD
TruePositive	AVQ54967	1008	1015	2.67e-07	-6.57349	AMEQGVSD
TruePositive	AIZ97149	1008	1015	2.67e-07	-6.57349	AMEQGVSD
TruePositive	AAR38845	1008	1015	2.67e-07	-6.57349	AMEQGVSD
TruePositive	AQM32741	1008	1015	2.67e-07	-6.57349	AMEQGVSD
TruePositive	AEK98140	1009	1016	2.67e-07	-6.57349	AMEQGVSD
TruePositive	ADE80725	1009	1016	2.67e-07	-6.57349	AMEQGVSD
TruePositive	AFG25593	1009	1016	2.67e-07	-6.57349	AMEQGVSD
TruePositive	ALB72976	1009	1016	2.67e-07	-6.57349	AMEQGVSD
TruePositive	AGH30718	1009	1016	2.67e-07	-6.57349	AMEQGVSD
TruePositive	ACJ04792	1009	1016	2.67e-07	-6.57349	AMEQGVSD
TruePositive	AHX57813	1009	1016	2.67e-07	-6.57349	AMEQGVSD
TruePositive	AHX57710	1009	1016	2.67e-07	-6.57349	AMEQGVSD
TruePositive	AUN27633	1009	1016	2.67e-07	-6.57349	AMEQGVSD
TruePositive	AGC82916	1009	1016	2.67e-07	-6.57349	AMEQGVSD
TruePositive	AHX57804	1009	1016	2.67e-07	-6.57349	AMEQGVSD
TruePositive	AVQ54965	1009	1016	2.67e-07	-6.57349	AMEQGVSD
TruePositive	ADC84176	1009	1016	2.67e-07	-6.57349	AMEQGVSD
TruePositive	ALB72982	1009	1016	2.67e-07	-6.57349	AMEQGVSD
TruePositive	ALB72981	1009	1016	2.67e-07	-6.57349	AMEQGVSD
TruePositive	AJD77347	1009	1016	2.67e-07	-6.57349	AMEQGVSD
TruePositive	AJD77367	1009	1016	2.67e-07	-6.57349	AMEQGVSD
TruePositive	ACB12927	1009	1016	2.67e-07	-6.57349	AMEQGVSD
TruePositive	AHX57803	1009	1016	2.67e-07	-6.57349	AMEQGVSD
TruePositive	AHX57659	1009	1016	2.67e-07	-6.57349	AMEQGVSD
TruePositive	AJD77368	1009	1016	2.67e-07	-6.57349	AMEQGVSD
TruePositive	AIG59230	1009	1016	2.67e-07	-6.57349	AMEQGVSD
TruePositive	ALC04474	1009	1016	2.67e-07	-6.57349	AMEQGVSD
TruePositive	AHX57716	1009	1016	2.67e-07	-6.57349	AMEQGVSD
TruePositive	ATU75293	1009	1016	2.67e-07	-6.57349	AMEQGVSD
TruePositive	ABC69251	1009	1016	2.67e-07	-6.57349	AMEQGVSD
TruePositive	AQX83081	1009	1016	2.67e-07	-6.57349	AMEQGVSD
TruePositive	AHX57661	1009	1016	2.67e-07	-6.57349	AMEQGVSD
TruePositive	ADE80713	1009	1016	2.67e-07	-6.57349	AMEQGVSD
TruePositive	AFD03546	1009	1016	2.67e-07	-6.57349	AMEQGVSD
TruePositive	AVQ55056	1009	1016	2.67e-07	-6.57349	AMEQGVSD
TruePositive	ABQ58082	1009	1016	2.67e-07	-6.57349	AMEQGVSD
TruePositive	AQX83057	1009	1016	2.67e-07	-6.57349	AMEQGVSD
TruePositive	AGV98962	1009	1016	2.67e-07	-6.57349	AMEQGVSD
TruePositive	AHX57807	1009	1016	2.67e-07	-6.57349	AMEQGVSD
TruePositive	AJD77348	1009	1016	2.67e-07	-6.57349	AMEQGVSD
TruePositive	AJD77338	1009	1016	2.67e-07	-6.57349	AMEQGVSD
TruePositive	AGW28583	1009	1016	2.67e-07	-6.57349	AMEQGVSD
TruePositive	AEI99578	1009	1016	2.67e-07	-6.57349	AMEQGVSD
TruePositive	AEK98137	1009	1016	2.67e-07	-6.57349	AMEQGVSD
TruePositive	AJQ21577	1009	1016	2.67e-07	-6.57349	AMEQGVSD
TruePositive	AGA37377	1009	1016	2.67e-07	-6.57349	AMEQGVSD
TruePositive	AGV98964	1009	1016	2.67e-07	-6.57349	AMEQGVSD
TruePositive	AEU04245	1009	1016	2.67e-07	-6.57349	AMEQGVSD
TruePositive	AJK93558	1009	1016	2.67e-07	-6.57349	AMEQGVSD
TruePositive	ASJ77393	1009	1016	2.67e-07	-6.57349	AMEQGVSD
TruePositive	AHX57754	1009	1016	2.67e-07	-6.57349	AMEQGVSD
TruePositive	ACB12926	1009	1016	2.67e-07	-6.57349	AMEQGVSD
TruePositive	APT69936	1009	1016	2.67e-07	-6.57349	AMEQGVSD
TruePositive	AJD77376	1009	1016	2.67e-07	-6.57349	AMEQGVSD
TruePositive	AEA11177	1009	1016	2.67e-07	-6.57349	AMEQGVSD
TruePositive	APM86432	1009	1016	2.67e-07	-6.57349	AMEQGVSD
TruePositive	AEI91790	1009	1016	2.67e-07	-6.57349	AMEQGVSD
TruePositive	AQX83079	1009	1016	2.67e-07	-6.57349	AMEQGVSD
TruePositive	AJD77357	1009	1016	2.67e-07	-6.57349	AMEQGVSD
TruePositive	AHB78922	1009	1016	2.67e-07	-6.57349	AMEQGVSD
TruePositive	AGV98954	1009	1016	2.67e-07	-6.57349	AMEQGVSD
TruePositive	ABC69250	1009	1016	2.67e-07	-6.57349	AMEQGVSD
TruePositive	AHX57665	1009	1016	2.67e-07	-6.57349	AMEQGVSD
TruePositive	ATY38889	1009	1016	2.67e-07	-6.57349	AMEQGVSD
TruePositive	AAK30618	1009	1016	2.67e-07	-6.57349	AMEQGVSD
TruePositive	ABE60737	1009	1016	2.67e-07	-6.57349	AMEQGVSD
TruePositive	AEK98135	1009	1016	2.67e-07	-6.57349	AMEQGVSD
TruePositive	ASJ77391	1009	1016	2.67e-07	-6.57349	AMEQGVSD
TruePositive	AJD77350	1009	1016	2.67e-07	-6.57349	AMEQGVSD
TruePositive	AKN20221	1009	1016	2.67e-07	-6.57349	AMEQGVSD
TruePositive	AJD77361	1009	1016	2.67e-07	-6.57349	AMEQGVSD
TruePositive	AHX57719	1009	1016	2.67e-07	-6.57349	AMEQGVSD
TruePositive	ALB72983	1009	1016	2.67e-07	-6.57349	AMEQGVSD
TruePositive	AHX57655	1009	1016	2.67e-07	-6.57349	AMEQGVSD
TruePositive	ACD63039	1009	1016	2.67e-07	-6.57349	AMEQGVSD
TruePositive	AEU04244	1009	1016	2.67e-07	-6.57349	AMEQGVSD
TruePositive	AHX57736	1009	1016	2.67e-07	-6.57349	AMEQGVSD
TruePositive	AJQ21580	1009	1016	2.67e-07	-6.57349	AMEQGVSD
TruePositive	AQX83066	1009	1016	2.67e-07	-6.57349	AMEQGVSD
TruePositive	AFN65695	1009	1016	2.67e-07	-6.57349	AMEQGVSD
TruePositive	AKE33320	1009	1016	2.67e-07	-6.57349	AMEQGVSD
TruePositive	ALB72984	1009	1016	2.67e-07	-6.57349	AMEQGVSD
TruePositive	AHX57771	1009	1016	2.67e-07	-6.57349	AMEQGVSD
TruePositive	ADX36154	1009	1016	2.67e-07	-6.57349	AMEQGVSD
TruePositive	AEA36683	1009	1016	2.67e-07	-6.57349	AMEQGVSD
TruePositive	AHX57733	1009	1016	2.67e-07	-6.57349	AMEQGVSD
TruePositive	AJQ21584	1009	1016	2.67e-07	-6.57349	AMEQGVSD
TruePositive	AJQ21575	1009	1016	2.67e-07	-6.57349	AMEQGVSD
TruePositive	ADI49643	1009	1016	2.67e-07	-6.57349	AMEQGVSD
TruePositive	AGK85257	1009	1016	2.67e-07	-6.57349	AMEQGVSD
TruePositive	AHX57657	1009	1016	2.67e-07	-6.57349	AMEQGVSD
TruePositive	AJD77373	1009	1016	2.67e-07	-6.57349	AMEQGVSD
TruePositive	AHX57822	1009	1016	2.67e-07	-6.57349	AMEQGVSD
TruePositive	AGC94567	1009	1016	2.67e-07	-6.57349	AMEQGVSD
TruePositive	ACM62759	1009	1016	2.67e-07	-6.57349	AMEQGVSD
TruePositive	AGW52034	1009	1016	2.67e-07	-6.57349	AMEQGVSD
TruePositive	AFR23507	1009	1016	2.67e-07	-6.57349	AMEQGVSD
TruePositive	AKN89893	1009	1016	2.67e-07	-6.57349	AMEQGVSD
TruePositive	AHN13891	1009	1016	2.67e-07	-6.57349	AMEQGVSD
TruePositive	AEC13062	1009	1016	2.67e-07	-6.57349	AMEQGVSD
TruePositive	AGA37386	1009	1016	2.67e-07	-6.57349	AMEQGVSD
TruePositive	ACI03062	1009	1016	2.67e-07	-6.57349	AMEQGVSD
TruePositive	ARU09504	1009	1016	2.67e-07	-6.57349	AMEQGVSD
TruePositive	AEC47482	1009	1016	2.67e-07	-6.57349	AMEQGVSD
TruePositive	AEC47480	1009	1016	2.67e-07	-6.57349	AMEQGVSD
TruePositive	AJK93554	1009	1016	2.67e-07	-6.57349	AMEQGVSD
TruePositive	AQX83059	1009	1016	2.67e-07	-6.57349	AMEQGVSD
TruePositive	AFU67046	1009	1016	2.67e-07	-6.57349	AMEQGVSD
TruePositive	AUI41040	1009	1016	2.67e-07	-6.57349	AMEQGVSD
TruePositive	ALB72991	1009	1016	2.67e-07	-6.57349	AMEQGVSD
TruePositive	AIU44172	1009	1016	2.67e-07	-6.57349	AMEQGVSD
TruePositive	ALB72978	1009	1016	2.67e-07	-6.57349	AMEQGVSD
TruePositive	AEA11175	1009	1016	2.67e-07	-6.57349	AMEQGVSD
TruePositive	AJD77349	1009	1016	2.67e-07	-6.57349	AMEQGVSD
TruePositive	ABC69256	1009	1016	2.67e-07	-6.57349	AMEQGVSD
TruePositive	AJQ21565	1009	1016	2.67e-07	-6.57349	AMEQGVSD
TruePositive	AHX57654	1009	1016	2.67e-07	-6.57349	AMEQGVSD
TruePositive	AHX57718	1009	1016	2.67e-07	-6.57349	AMEQGVSD
TruePositive	AAK13008	1009	1016	2.67e-07	-6.57349	AMEQGVSD
TruePositive	AJD77317	1009	1016	2.67e-07	-6.57349	AMEQGVSD
TruePositive	AHX57796	1009	1016	2.67e-07	-6.57349	AMEQGVSD
TruePositive	ADG57605	1009	1016	2.67e-07	-6.57349	AMEQGVSD
TruePositive	AIV43938	1009	1016	2.67e-07	-6.57349	AMEQGVSD
TruePositive	ADE80710	1009	1016	2.67e-07	-6.57349	AMEQGVSD
TruePositive	AFN88507	1009	1016	2.67e-07	-6.57349	AMEQGVSD
TruePositive	AJD77345	1009	1016	2.67e-07	-6.57349	AMEQGVSD
TruePositive	AQX83062	1009	1016	2.67e-07	-6.57349	AMEQGVSD
TruePositive	AHX57760	1009	1016	2.67e-07	-6.57349	AMEQGVSD
TruePositive	AHA38102	1009	1016	2.67e-07	-6.57349	AMEQGVSD
TruePositive	ALC04472	1009	1016	2.67e-07	-6.57349	AMEQGVSD
TruePositive	AHX57651	1009	1016	2.67e-07	-6.57349	AMEQGVSD
TruePositive	ABC69254	1009	1016	2.67e-07	-6.57349	AMEQGVSD
TruePositive	AGV98961	1009	1016	2.67e-07	-6.57349	AMEQGVSD
TruePositive	ALC04478	1009	1016	2.67e-07	-6.57349	AMEQGVSD
TruePositive	AHX57772	1009	1016	2.67e-07	-6.57349	AMEQGVSD
TruePositive	AII80503	1009	1016	2.67e-07	-6.57349	AMEQGVSD
TruePositive	AGA37367	1009	1016	2.67e-07	-6.57349	AMEQGVSD
TruePositive	AHX57768	1009	1016	2.67e-07	-6.57349	AMEQGVSD
TruePositive	ALB72964	1009	1016	2.67e-07	-6.57349	AMEQGVSD
TruePositive	AHN13894	1009	1016	2.67e-07	-6.57349	AMEQGVSD
TruePositive	ACI25379	1009	1016	2.67e-07	-6.57349	AMEQGVSD
TruePositive	AQZ26618	1009	1016	2.67e-07	-6.57349	AMEQGVSD
TruePositive	ALB72994	1009	1016	2.67e-07	-6.57349	AMEQGVSD
TruePositive	AGH30725	1009	1016	2.67e-07	-6.57349	AMEQGVSD
TruePositive	AHX57703	1009	1016	2.67e-07	-6.57349	AMEQGVSD
TruePositive	AHX57769	1009	1016	2.67e-07	-6.57349	AMEQGVSD
TruePositive	AEK98534	1009	1016	2.67e-07	-6.57349	AMEQGVSD
TruePositive	AGC60010	1009	1016	2.67e-07	-6.57349	AMEQGVSD
TruePositive	ADJ37049	1009	1016	2.67e-07	-6.57349	AMEQGVSD
TruePositive	AFQ91922	1009	1016	2.67e-07	-6.57349	AMEQGVSD
TruePositive	AHX57809	1009	1016	2.67e-07	-6.57349	AMEQGVSD
TruePositive	AEI99574	1009	1016	2.67e-07	-6.57349	AMEQGVSD
TruePositive	ALB72972	1009	1016	2.67e-07	-6.57349	AMEQGVSD
TruePositive	AHX57744	1009	1016	2.67e-07	-6.57349	AMEQGVSD
TruePositive	AJQ21581	1009	1016	2.67e-07	-6.57349	AMEQGVSD
TruePositive	AEB71507	1009	1016	2.67e-07	-6.57349	AMEQGVSD
TruePositive	AFN65692	1009	1016	2.67e-07	-6.57349	AMEQGVSD
TruePositive	AFD53622	1009	1016	2.67e-07	-6.57349	AMEQGVSD
TruePositive	AJD77353	1009	1016	2.67e-07	-6.57349	AMEQGVSD
TruePositive	AQX83065	1009	1016	2.67e-07	-6.57349	AMEQGVSD
TruePositive	AHX57723	1009	1016	2.67e-07	-6.57349	AMEQGVSD
TruePositive	AGW52036	1009	1016	2.67e-07	-6.57349	AMEQGVSD
TruePositive	AHX57778	1009	1016	2.67e-07	-6.57349	AMEQGVSD
TruePositive	APM86434	1009	1016	2.67e-07	-6.57349	AMEQGVSD
TruePositive	ADE80718	1009	1016	2.67e-07	-6.57349	AMEQGVSD
TruePositive	AEI99577	1009	1016	2.67e-07	-6.57349	AMEQGVSD
TruePositive	ALB72971	1009	1016	2.67e-07	-6.57349	AMEQGVSD
TruePositive	AEK98149	1009	1016	2.67e-07	-6.57349	AMEQGVSD
TruePositive	AEC13061	1009	1016	2.67e-07	-6.57349	AMEQGVSD
TruePositive	AJE29752	1009	1016	2.67e-07	-6.57349	AMEQGVSD
TruePositive	AQX83061	1009	1016	2.67e-07	-6.57349	AMEQGVSD
TruePositive	AAY59418	1009	1016	2.67e-07	-6.57349	AMEQGVSD
TruePositive	AHX57810	1009	1016	2.67e-07	-6.57349	AMEQGVSD
TruePositive	AJQ21578	1009	1016	2.67e-07	-6.57349	AMEQGVSD
TruePositive	ADQ54216	1009	1016	2.67e-07	-6.57349	AMEQGVSD
TruePositive	AGV98960	1009	1016	2.67e-07	-6.57349	AMEQGVSD
TruePositive	AHV82107	1009	1016	2.67e-07	-6.57349	AMEQGVSD
TruePositive	AGV98956	1009	1016	2.67e-07	-6.57349	AMEQGVSD
TruePositive	AJQ21567	1009	1016	2.67e-07	-6.57349	AMEQGVSD
TruePositive	AAR38847	1009	1016	2.67e-07	-6.57349	AMEQGVSD
TruePositive	ALB72996	1009	1016	2.67e-07	-6.57349	AMEQGVSD
TruePositive	AGW50777	1009	1016	2.67e-07	-6.57349	AMEQGVSD
TruePositive	ASK51768	1009	1016	2.67e-07	-6.57349	AMEQGVSD
TruePositive	AHX57735	1009	1016	2.67e-07	-6.57349	AMEQGVSD
TruePositive	AII80504	1009	1016	2.67e-07	-6.57349	AMEQGVSD
TruePositive	AFD53620	1009	1016	2.67e-07	-6.57349	AMEQGVSD
TruePositive	AER26647	1009	1016	2.67e-07	-6.57349	AMEQGVSD
TruePositive	AHX57745	1009	1016	2.67e-07	-6.57349	AMEQGVSD
TruePositive	AML83911	1009	1016	2.67e-07	-6.57349	AMEQGVSD
TruePositive	ABX55895	1009	1016	2.67e-07	-6.57349	AMEQGVSD
TruePositive	AIG59231	1009	1016	2.67e-07	-6.57349	AMEQGVSD
TruePositive	AGA37380	1009	1016	2.67e-07	-6.57349	AMEQGVSD
TruePositive	ACJ04793	1009	1016	2.67e-07	-6.57349	AMEQGVSD
TruePositive	AFD03545	1009	1016	2.67e-07	-6.57349	AMEQGVSD
TruePositive	BAJ49827	1009	1016	2.67e-07	-6.57349	AMEQGVSD
TruePositive	AIG13041	1009	1016	2.67e-07	-6.57349	AMEQGVSD
TruePositive	AHX57692	1009	1016	2.67e-07	-6.57349	AMEQGVSD
TruePositive	AFQ91920	1009	1016	2.67e-07	-6.57349	AMEQGVSD
TruePositive	AFQ91919	1009	1016	2.67e-07	-6.57349	AMEQGVSD
TruePositive	AGH30722	1009	1016	2.67e-07	-6.57349	AMEQGVSD
TruePositive	AGA37370	1009	1016	2.67e-07	-6.57349	AMEQGVSD
TruePositive	AEA11176	1009	1016	2.67e-07	-6.57349	AMEQGVSD
TruePositive	AHJ78647	1009	1016	2.67e-07	-6.57349	AMEQGVSD
TruePositive	AEX92838	1009	1016	2.67e-07	-6.57349	AMEQGVSD
TruePositive	AHX57686	1009	1016	2.67e-07	-6.57349	AMEQGVSD
TruePositive	ADE80720	1009	1016	2.67e-07	-6.57349	AMEQGVSD
TruePositive	AHN13888	1009	1016	2.67e-07	-6.57349	AMEQGVSD
TruePositive	AGH30719	1009	1016	2.67e-07	-6.57349	AMEQGVSD
TruePositive	BAJ49826	1009	1016	2.67e-07	-6.57349	AMEQGVSD
TruePositive	AVQ54964	1009	1016	2.67e-07	-6.57349	AMEQGVSD
TruePositive	AUF49660	1009	1016	2.67e-07	-6.57349	AMEQGVSD
TruePositive	AGA37378	1009	1016	2.67e-07	-6.57349	AMEQGVSD
TruePositive	ALC04471	1009	1016	2.67e-07	-6.57349	AMEQGVSD
TruePositive	AQZ26621	1009	1016	2.67e-07	-6.57349	AMEQGVSD
TruePositive	AJD77335	1009	1016	2.67e-07	-6.57349	AMEQGVSD
TruePositive	AQZ26614	1009	1016	2.67e-07	-6.57349	AMEQGVSD
TruePositive	AJK93557	1009	1016	2.67e-07	-6.57349	AMEQGVSD
TruePositive	AJD77375	1009	1016	2.67e-07	-6.57349	AMEQGVSD
TruePositive	ACM62757	1009	1016	2.67e-07	-6.57349	AMEQGVSD
TruePositive	ADI49645	1009	1016	2.67e-07	-6.57349	AMEQGVSD
TruePositive	ALC04476	1009	1016	2.67e-07	-6.57349	AMEQGVSD
TruePositive	AKA60615	1009	1016	2.67e-07	-6.57349	AMEQGVSD
TruePositive	AFA50500	1009	1016	2.67e-07	-6.57349	AMEQGVSD
TruePositive	AGA37382	1009	1016	2.67e-07	-6.57349	AMEQGVSD
TruePositive	AVV61066	1009	1016	2.67e-07	-6.57349	AMEQGVSD
TruePositive	AJQ21569	1009	1016	2.67e-07	-6.57349	AMEQGVSD
TruePositive	AJD77355	1009	1016	2.67e-07	-6.57349	AMEQGVSD
TruePositive	ACF21980	1009	1016	2.67e-07	-6.57349	AMEQGVSD
TruePositive	AHX57693	1009	1016	2.67e-07	-6.57349	AMEQGVSD
TruePositive	ABN11270	1009	1016	2.67e-07	-6.57349	AMEQGVSD
TruePositive	AHX57668	1009	1016	2.67e-07	-6.57349	AMEQGVSD
TruePositive	AGA37369	1009	1016	2.67e-07	-6.57349	AMEQGVSD
TruePositive	BAG82821	1009	1016	2.67e-07	-6.57349	AMEQGVSD
TruePositive	AHX57667	1009	1016	2.67e-07	-6.57349	AMEQGVSD
TruePositive	AHX57705	1009	1016	2.67e-07	-6.57349	AMEQGVSD
TruePositive	ARU09506	1009	1016	2.67e-07	-6.57349	AMEQGVSD
TruePositive	ADJ37050	1009	1016	2.67e-07	-6.57349	AMEQGVSD
TruePositive	AAV54187	1009	1016	2.67e-07	-6.57349	AMEQGVSD
TruePositive	ABW98598	1009	1016	2.67e-07	-6.57349	AMEQGVSD
TruePositive	AGO01890	1009	1016	2.67e-07	-6.57349	AMEQGVSD
TruePositive	ACJ70062	1009	1016	2.67e-07	-6.57349	AMEQGVSD
TruePositive	ALB72998	1009	1016	2.67e-07	-6.57349	AMEQGVSD
TruePositive	AEO92095	1009	1016	2.67e-07	-6.57349	AMEQGVSD
TruePositive	AJD77346	1009	1016	2.67e-07	-6.57349	AMEQGVSD
TruePositive	AVV61069	1009	1016	2.67e-07	-6.57349	AMEQGVSD
TruePositive	AFD54862	1009	1016	2.67e-07	-6.57349	AMEQGVSD
TruePositive	ARU09505	1009	1016	2.67e-07	-6.57349	AMEQGVSD
TruePositive	AJD77341	1009	1016	2.67e-07	-6.57349	AMEQGVSD
TruePositive	ADN65641	1009	1016	2.67e-07	-6.57349	AMEQGVSD
TruePositive	ALC04477	1009	1016	2.67e-07	-6.57349	AMEQGVSD
TruePositive	AFD53621	1009	1016	2.67e-07	-6.57349	AMEQGVSD
TruePositive	APT69935	1009	1016	2.67e-07	-6.57349	AMEQGVSD
TruePositive	AUF49641	1009	1016	2.67e-07	-6.57349	AMEQGVSD
TruePositive	ADQ54217	1009	1016	2.67e-07	-6.57349	AMEQGVSD
TruePositive	AMA66309	1009	1016	2.67e-07	-6.57349	AMEQGVSD
TruePositive	AEC47479	1009	1016	2.67e-07	-6.57349	AMEQGVSD
TruePositive	AHN91978	1009	1016	2.67e-07	-6.57349	AMEQGVSD
TruePositive	AEQ59481	1009	1016	2.67e-07	-6.57349	AMEQGVSD
TruePositive	AGT18269	1009	1016	2.67e-07	-6.57349	AMEQGVSD
TruePositive	AHX57715	1009	1016	2.67e-07	-6.57349	AMEQGVSD
TruePositive	AGO01891	1009	1016	2.67e-07	-6.57349	AMEQGVSD
TruePositive	AHX57800	1009	1016	2.67e-07	-6.57349	AMEQGVSD
TruePositive	APT69933	1009	1016	2.67e-07	-6.57349	AMEQGVSD
TruePositive	AKE33313	1009	1016	2.67e-07	-6.57349	AMEQGVSD
TruePositive	AHX57721	1009	1016	2.67e-07	-6.57349	AMEQGVSD
TruePositive	ACD63040	1009	1016	2.67e-07	-6.57349	AMEQGVSD
TruePositive	AGV98957	1009	1016	2.67e-07	-6.57349	AMEQGVSD
TruePositive	APM86433	1009	1016	2.67e-07	-6.57349	AMEQGVSD
TruePositive	AUD09283	1009	1016	2.67e-07	-6.57349	AMEQGVSD
TruePositive	APT69931	1009	1016	2.67e-07	-6.57349	AMEQGVSD
TruePositive	AHX57815	1009	1016	2.67e-07	-6.57349	AMEQGVSD
TruePositive	AFB74658	1009	1016	2.67e-07	-6.57349	AMEQGVSD
TruePositive	ADC84177	1009	1016	2.67e-07	-6.57349	AMEQGVSD
TruePositive	AGH30724	1009	1016	2.67e-07	-6.57349	AMEQGVSD
TruePositive	ABC69252	1009	1016	2.67e-07	-6.57349	AMEQGVSD
TruePositive	AUN27640	1009	1016	2.67e-07	-6.57349	AMEQGVSD
TruePositive	ATN96927	1009	1016	2.67e-07	-6.57349	AMEQGVSD
TruePositive	APR72753	1009	1016	2.67e-07	-6.57349	AMEQGVSD
TruePositive	AHX57767	1009	1016	2.67e-07	-6.57349	AMEQGVSD
TruePositive	APT69926	1009	1016	2.67e-07	-6.57349	AMEQGVSD
TruePositive	AEK77619	1009	1016	2.67e-07	-6.57349	AMEQGVSD
TruePositive	ACK37353	1009	1016	2.67e-07	-6.57349	AMEQGVSD
TruePositive	ABC69260	1009	1016	2.67e-07	-6.57349	AMEQGVSD
TruePositive	AGW50776	1009	1016	2.67e-07	-6.57349	AMEQGVSD
TruePositive	AQX83076	1009	1016	2.67e-07	-6.57349	AMEQGVSD
TruePositive	ARU09508	1009	1016	2.67e-07	-6.57349	AMEQGVSD
TruePositive	ADG57604	1009	1016	2.67e-07	-6.57349	AMEQGVSD
TruePositive	AJQ21571	1009	1016	2.67e-07	-6.57349	AMEQGVSD
TruePositive	ABQ58081	1009	1016	2.67e-07	-6.57349	AMEQGVSD
TruePositive	AGA37384	1009	1016	2.67e-07	-6.57349	AMEQGVSD
TruePositive	APT69927	1009	1016	2.67e-07	-6.57349	AMEQGVSD
TruePositive	AEI99575	1009	1016	2.67e-07	-6.57349	AMEQGVSD
TruePositive	AGV98963	1009	1016	2.67e-07	-6.57349	AMEQGVSD
TruePositive	AQZ26611	1009	1016	2.67e-07	-6.57349	AMEQGVSD
TruePositive	APT69924	1009	1016	2.67e-07	-6.57349	AMEQGVSD
TruePositive	ACO89621	1009	1016	2.67e-07	-6.57349	AMEQGVSD
TruePositive	ADD84781	1009	1016	2.67e-07	-6.57349	AMEQGVSD
TruePositive	ABD36802	1009	1016	2.67e-07	-6.57349	AMEQGVSD
TruePositive	APM86435	1009	1016	2.67e-07	-6.57349	AMEQGVSD
TruePositive	AFQ91918	1009	1016	2.67e-07	-6.57349	AMEQGVSD
TruePositive	AMA66308	1009	1016	2.67e-07	-6.57349	AMEQGVSD
TruePositive	ADE80722	1009	1016	2.67e-07	-6.57349	AMEQGVSD
TruePositive	AHX57801	1009	1016	2.67e-07	-6.57349	AMEQGVSD
TruePositive	ACI25378	1009	1016	2.67e-07	-6.57349	AMEQGVSD
TruePositive	AUN27638	1009	1016	2.67e-07	-6.57349	AMEQGVSD
TruePositive	AGW28582	1009	1016	2.67e-07	-6.57349	AMEQGVSD
TruePositive	AMA66310	1009	1016	2.67e-07	-6.57349	AMEQGVSD
TruePositive	ALB72997	1009	1016	2.67e-07	-6.57349	AMEQGVSD
TruePositive	AJD77318	1009	1016	2.67e-07	-6.57349	AMEQGVSD
TruePositive	AGA37371	1009	1016	2.67e-07	-6.57349	AMEQGVSD
TruePositive	AEC47476	1009	1016	2.67e-07	-6.57349	AMEQGVSD
TruePositive	AHX57685	1009	1016	2.67e-07	-6.57349	AMEQGVSD
TruePositive	ADE80712	1009	1016	2.67e-07	-6.57349	AMEQGVSD
TruePositive	AEC47481	1009	1016	2.67e-07	-6.57349	AMEQGVSD
TruePositive	ALB72967	1009	1016	2.67e-07	-6.57349	AMEQGVSD
TruePositive	ASW20950	1009	1016	2.67e-07	-6.57349	AMEQGVSD
TruePositive	AGW52035	1009	1016	2.67e-07	-6.57349	AMEQGVSD
TruePositive	AHX57776	1009	1016	2.67e-07	-6.57349	AMEQGVSD
TruePositive	AGT18270	1009	1016	2.67e-07	-6.57349	AMEQGVSD
TruePositive	ACM62758	1009	1016	2.67e-07	-6.57349	AMEQGVSD
TruePositive	AGK07542	1009	1016	2.67e-07	-6.57349	AMEQGVSD
TruePositive	ACY00663	1009	1016	2.67e-07	-6.57349	AMEQGVSD
TruePositive	ARD27152	1009	1016	2.67e-07	-6.57349	AMEQGVSD
TruePositive	AHX57746	1009	1016	2.67e-07	-6.57349	AMEQGVSD
TruePositive	BAJ49821	1009	1016	2.67e-07	-6.57349	AMEQGVSD
TruePositive	AGH30720	1009	1016	2.67e-07	-6.57349	AMEQGVSD
TruePositive	AHX57816	1009	1016	2.67e-07	-6.57349	AMEQGVSD
TruePositive	ARU09512	1009	1016	2.67e-07	-6.57349	AMEQGVSD
TruePositive	AHX57652	1009	1016	2.67e-07	-6.57349	AMEQGVSD
TruePositive	AHX57751	1009	1016	2.67e-07	-6.57349	AMEQGVSD
TruePositive	ADX87405	1009	1016	2.67e-07	-6.57349	AMEQGVSD
TruePositive	AHX57717	1009	1016	2.67e-07	-6.57349	AMEQGVSD
TruePositive	ALB72999	1009	1016	2.67e-07	-6.57349	AMEQGVSD
TruePositive	AEP27862	1009	1016	2.67e-07	-6.57349	AMEQGVSD
TruePositive	AVD69557	1009	1016	2.67e-07	-6.57349	AMEQGVSD
TruePositive	AFD34253	1009	1016	2.67e-07	-6.57349	AMEQGVSD
TruePositive	AGO01893	1009	1016	2.67e-07	-6.57349	AMEQGVSD
TruePositive	ADE80707	1009	1016	2.67e-07	-6.57349	AMEQGVSD
TruePositive	ACU45378	1009	1016	2.67e-07	-6.57349	AMEQGVSD
TruePositive	ADI49642	1009	1016	2.67e-07	-6.57349	AMEQGVSD
TruePositive	AGA37372	1009	1016	2.67e-07	-6.57349	AMEQGVSD
TruePositive	ACY00665	1009	1016	2.67e-07	-6.57349	AMEQGVSD
TruePositive	AEK98144	1009	1016	2.67e-07	-6.57349	AMEQGVSD
TruePositive	ALB72974	1009	1016	2.67e-07	-6.57349	AMEQGVSD
TruePositive	AHX57646	1009	1016	2.67e-07	-6.57349	AMEQGVSD
TruePositive	AHX57645	1009	1016	2.67e-07	-6.57349	AMEQGVSD
TruePositive	AHX57677	1009	1016	2.67e-07	-6.57349	AMEQGVSD
TruePositive	AER24548	1009	1016	2.67e-07	-6.57349	AMEQGVSD
TruePositive	AHX57642	1009	1016	2.67e-07	-6.57349	AMEQGVSD
TruePositive	AHC99295	1009	1016	2.67e-07	-6.57349	AMEQGVSD
TruePositive	AEA11174	1009	1016	2.67e-07	-6.57349	AMEQGVSD
TruePositive	AUN27634	1009	1016	2.67e-07	-6.57349	AMEQGVSD
TruePositive	AGV98965	1009	1016	2.67e-07	-6.57349	AMEQGVSD
TruePositive	AGO01888	1009	1016	2.67e-07	-6.57349	AMEQGVSD
TruePositive	AIY27444	1009	1016	2.67e-07	-6.57349	AMEQGVSD
TruePositive	AEJ54595	1009	1016	2.67e-07	-6.57349	AMEQGVSD
TruePositive	AFK64751	1009	1016	2.67e-07	-6.57349	AMEQGVSD
TruePositive	AJD39295	1009	1016	2.67e-07	-6.57349	AMEQGVSD
TruePositive	AGC82917	1009	1016	2.67e-07	-6.57349	AMEQGVSD
TruePositive	BBD18129	1009	1016	2.67e-07	-6.57349	AMEQGVSD
TruePositive	ABC69257	1009	1016	2.67e-07	-6.57349	AMEQGVSD
TruePositive	AHX57766	1009	1016	2.67e-07	-6.57349	AMEQGVSD
TruePositive	APM88375	1009	1016	2.67e-07	-6.57349	AMEQGVSD
TruePositive	AGA37374	1009	1016	2.67e-07	-6.57349	AMEQGVSD
TruePositive	AEQ59479	1009	1016	2.67e-07	-6.57349	AMEQGVSD
TruePositive	BAJ49822	1009	1016	2.67e-07	-6.57349	AMEQGVSD
TruePositive	AHX57811	1009	1016	2.67e-07	-6.57349	AMEQGVSD
TruePositive	AOP13014	1009	1016	2.67e-07	-6.57349	AMEQGVSD
TruePositive	AHX57694	1009	1016	2.67e-07	-6.57349	AMEQGVSD
TruePositive	ABC69259	1009	1016	2.67e-07	-6.57349	AMEQGVSD
TruePositive	ADE80724	1009	1016	2.67e-07	-6.57349	AMEQGVSD
TruePositive	AFK64752	1009	1016	2.67e-07	-6.57349	AMEQGVSD
TruePositive	AHX57662	1009	1016	2.67e-07	-6.57349	AMEQGVSD
TruePositive	APT69929	1009	1016	2.67e-07	-6.57349	AMEQGVSD
TruePositive	ALB72965	1009	1016	2.67e-07	-6.57349	AMEQGVSD
TruePositive	AHX57706	1009	1016	2.67e-07	-6.57349	AMEQGVSD
TruePositive	AMA66307	1009	1016	2.67e-07	-6.57349	AMEQGVSD
TruePositive	AHX57755	1009	1016	2.67e-07	-6.57349	AMEQGVSD
TruePositive	AQX83074	1009	1016	2.67e-07	-6.57349	AMEQGVSD
TruePositive	AHX57708	1009	1016	2.67e-07	-6.57349	AMEQGVSD
TruePositive	AFA50499	1009	1016	2.67e-07	-6.57349	AMEQGVSD
TruePositive	AFJ91813	1009	1016	2.67e-07	-6.57349	AMEQGVSD
TruePositive	ALB72979	1009	1016	2.67e-07	-6.57349	AMEQGVSD
TruePositive	AHX57713	1009	1016	2.67e-07	-6.57349	AMEQGVSD
TruePositive	AHN13893	1009	1016	2.67e-07	-6.57349	AMEQGVSD
TruePositive	AHV82109	1009	1016	2.67e-07	-6.57349	AMEQGVSD
TruePositive	AHX57764	1009	1016	2.67e-07	-6.57349	AMEQGVSD
TruePositive	AFN65696	1009	1016	2.67e-07	-6.57349	AMEQGVSD
TruePositive	ABC69255	1009	1016	2.67e-07	-6.57349	AMEQGVSD
TruePositive	AHX57675	1009	1016	2.67e-07	-6.57349	AMEQGVSD
TruePositive	AVV61067	1009	1016	2.67e-07	-6.57349	AMEQGVSD
TruePositive	ACY00662	1009	1016	2.67e-07	-6.57349	AMEQGVSD
TruePositive	AEQ59480	1009	1016	2.67e-07	-6.57349	AMEQGVSD
TruePositive	AGC60009	1009	1016	2.67e-07	-6.57349	AMEQGVSD
TruePositive	ALB72986	1009	1016	2.67e-07	-6.57349	AMEQGVSD
TruePositive	ACH87535	1009	1016	2.67e-07	-6.57349	AMEQGVSD
TruePositive	ALC04480	1009	1016	2.67e-07	-6.57349	AMEQGVSD
TruePositive	AJD77369	1009	1016	2.67e-07	-6.57349	AMEQGVSD
TruePositive	APT69932	1009	1016	2.67e-07	-6.57349	AMEQGVSD
TruePositive	AJQ21570	1009	1016	2.67e-07	-6.57349	AMEQGVSD
TruePositive	AFN65694	1009	1016	2.67e-07	-6.57349	AMEQGVSD
TruePositive	AFQ91921	1009	1016	2.67e-07	-6.57349	AMEQGVSD
TruePositive	AMA66311	1009	1016	2.67e-07	-6.57349	AMEQGVSD
TruePositive	AJQ21579	1009	1016	2.67e-07	-6.57349	AMEQGVSD
TruePositive	AOS85283	1009	1016	2.67e-07	-6.57349	AMEQGVSD
TruePositive	AHX57700	1009	1016	2.67e-07	-6.57349	AMEQGVSD
TruePositive	ADE80717	1009	1016	2.67e-07	-6.57349	AMEQGVSD
TruePositive	AEA11172	1009	1016	2.67e-07	-6.57349	AMEQGVSD
TruePositive	AJK93553	1009	1016	2.67e-07	-6.57349	AMEQGVSD
TruePositive	AHX57698	1009	1016	2.67e-07	-6.57349	AMEQGVSD
TruePositive	AHX57653	1009	1016	2.67e-07	-6.57349	AMEQGVSD
TruePositive	AHX57681	1009	1016	2.67e-07	-6.57349	AMEQGVSD
TruePositive	AHX57640	1009	1016	2.67e-07	-6.57349	AMEQGVSD
TruePositive	AEK98141	1009	1016	2.67e-07	-6.57349	AMEQGVSD
TruePositive	AQX83067	1009	1016	2.67e-07	-6.57349	AMEQGVSD
TruePositive	AHX57670	1009	1016	2.67e-07	-6.57349	AMEQGVSD
TruePositive	AUN27637	1009	1016	2.67e-07	-6.57349	AMEQGVSD
TruePositive	AJD77374	1009	1016	2.67e-07	-6.57349	AMEQGVSD
TruePositive	AGA37383	1009	1016	2.67e-07	-6.57349	AMEQGVSD
TruePositive	ACM62756	1009	1016	2.67e-07	-6.57349	AMEQGVSD
TruePositive	ACU45380	1009	1016	2.67e-07	-6.57349	AMEQGVSD
TruePositive	AGH30715	1009	1016	2.67e-07	-6.57349	AMEQGVSD
TruePositive	AGC60011	1009	1016	2.67e-07	-6.57349	AMEQGVSD
TruePositive	AFC75700	1009	1016	2.67e-07	-6.57349	AMEQGVSD
TruePositive	AEA11173	1009	1016	2.67e-07	-6.57349	AMEQGVSD
TruePositive	AHX57641	1009	1016	2.67e-07	-6.57349	AMEQGVSD
TruePositive	AFR23503	1009	1016	2.67e-07	-6.57349	AMEQGVSD
TruePositive	AFJ40582	1009	1016	2.67e-07	-6.57349	AMEQGVSD
TruePositive	AMA66312	1009	1016	2.67e-07	-6.57349	AMEQGVSD
TruePositive	ALC04479	1009	1016	2.67e-07	-6.57349	AMEQGVSD
TruePositive	AKA60616	1009	1016	2.67e-07	-6.57349	AMEQGVSD
TruePositive	AHX57790	1009	1016	2.67e-07	-6.57349	AMEQGVSD
TruePositive	ACY00664	1009	1016	2.67e-07	-6.57349	AMEQGVSD
TruePositive	ADE80719	1009	1016	2.67e-07	-6.57349	AMEQGVSD
TruePositive	ABC69262	1009	1016	2.67e-07	-6.57349	AMEQGVSD
TruePositive	ASM58485	1009	1016	2.67e-07	-6.57349	AMEQGVSD
TruePositive	AAA50478	1009	1016	2.67e-07	-6.57349	AMEQGVSD
TruePositive	AHX57808	1009	1016	2.67e-07	-6.57349	AMEQGVSD
TruePositive	AEC47475	1009	1016	2.67e-07	-6.57349	AMEQGVSD
TruePositive	BAJ49824	1009	1016	2.67e-07	-6.57349	AMEQGVSD
TruePositive	AJD77321	1009	1016	2.67e-07	-6.57349	AMEQGVSD
TruePositive	AQT26512	1009	1016	2.67e-07	-6.57349	AMEQGVSD
TruePositive	AHN13889	1009	1016	2.67e-07	-6.57349	AMEQGVSD
TruePositive	AHK12886	1009	1016	2.67e-07	-6.57349	AMEQGVSD
TruePositive	AJD77319	1009	1016	2.67e-07	-6.57349	AMEQGVSD
TruePositive	AJK93555	1009	1016	2.67e-07	-6.57349	AMEQGVSD
TruePositive	ACI25595	1009	1016	2.67e-07	-6.57349	AMEQGVSD
TruePositive	AJQ21583	1009	1016	2.67e-07	-6.57349	AMEQGVSD
TruePositive	AIY27445	1009	1016	2.67e-07	-6.57349	AMEQGVSD
TruePositive	AHX57712	1009	1016	2.67e-07	-6.57349	AMEQGVSD
TruePositive	ADI49644	1009	1016	2.67e-07	-6.57349	AMEQGVSD
TruePositive	AHX57797	1009	1016	2.67e-07	-6.57349	AMEQGVSD
TruePositive	ALX18071	1009	1016	2.67e-07	-6.57349	AMEQGVSD
TruePositive	AJD77331	1009	1016	2.67e-07	-6.57349	AMEQGVSD
TruePositive	BAJ49823	1009	1016	2.67e-07	-6.57349	AMEQGVSD
TruePositive	AJR21495	1009	1016	2.67e-07	-6.57349	AMEQGVSD
TruePositive	AGA37376	1009	1016	2.67e-07	-6.57349	AMEQGVSD
TruePositive	APT69930	1009	1016	2.67e-07	-6.57349	AMEQGVSD
TruePositive	AHX57779	1009	1016	2.67e-07	-6.57349	AMEQGVSD
TruePositive	AEK98143	1009	1016	2.67e-07	-6.57349	AMEQGVSD
TruePositive	AHX57680	1009	1016	2.67e-07	-6.57349	AMEQGVSD
TruePositive	AUN27641	1009	1016	2.67e-07	-6.57349	AMEQGVSD
TruePositive	ADD91656	1009	1016	2.67e-07	-6.57349	AMEQGVSD
TruePositive	ADE80711	1009	1016	2.67e-07	-6.57349	AMEQGVSD
TruePositive	AVK40358	1009	1016	2.67e-07	-6.57349	AMEQGVSD
TruePositive	AJD77356	1009	1016	2.67e-07	-6.57349	AMEQGVSD
TruePositive	ALB72961	1009	1016	2.67e-07	-6.57349	AMEQGVSD
TruePositive	AHX57784	1009	1016	2.67e-07	-6.57349	AMEQGVSD
TruePositive	ALC04473	1009	1016	2.67e-07	-6.57349	AMEQGVSD
TruePositive	AHV82108	1009	1016	2.67e-07	-6.57349	AMEQGVSD
TruePositive	BAD89965	1009	1016	2.67e-07	-6.57349	AMEQGVSD
TruePositive	AEI55866	1009	1016	2.67e-07	-6.57349	AMEQGVSD
TruePositive	ALB72962	1009	1016	2.67e-07	-6.57349	AMEQGVSD
TruePositive	ALB72980	1009	1016	2.67e-07	-6.57349	AMEQGVSD
TruePositive	AIG13043	1009	1016	2.67e-07	-6.57349	AMEQGVSD
[truncated: 18,886 more rows]

## Sheet: S3B. False Positives
Supplemental Table S3B. Un-optimized 3C cleavage motif scores for False Positive hits within enteroviral polyprotein dataset
MatchType	sequence_name	start_pos	stop_pos	p-value	log10_p-val	matched_sequence
FalsePositive	ACN59569	41	48	1.55e-05	-4.80967	AGKQGLKQ
FalsePositive	AAQ73076	694	701	2.06e-05	-4.68613	NKRQGAPV
FalsePositive	AIA21703	909	916	2.14e-05	-4.66959	VTFQGPGI
FalsePositive	AAX47044	204	211	2.36e-05	-4.62709	ADVQGVVT
FalsePositive	AAW30684	937	944	2.84e-05	-4.54668	VSFQGPGI
FalsePositive	AAL69631	931	938	2.92e-05	-4.53462	AYFQGPGI
FalsePositive	ACD78141	41	48	3.32e-05	-4.47886	ASKQGFSQ
FalsePositive	NP_758520	1904	1911	3.36e-05	-4.47366	AFHQNPGT
FalsePositive	ANZ02994	921	928	3.86e-05	-4.41341	VSFQGPGL
FalsePositive	ACT31465	1069	1076	4.37e-05	-4.35952	ASVQNIIT
FalsePositive	ABO69379	1915	1922	4.59e-05	-4.33819	AFHQNPGV
FalsePositive	ACK37417	469	476	5.11e-05	-4.29158	PGAQGPTT
FalsePositive	AHG06624	729	736	6.31e-05	-4.19997	ADTEGPPV
FalsePositive	AAF05693	729	736	6.38e-05	-4.19518	ADVEGPPV
FalsePositive	ALB73004	1721	1728	6.69e-05	-4.17457	NGHQGFST
FalsePositive	AFR77805	936	943	7.74e-05	-4.11126	ISFQGPGI
FalsePositive	ACK37386	463	470	9.12e-05	-4.04001	PGAQGPIK
FalsePositive	ABM54550	1069	1076	9.62e-05	-4.01682	ASVQSVIT
FalsePositive	ACJ04792	41	48	0.000101	-3.99568	AGEQSLKQ
FalsePositive	AHB78922	41	48	0.000105	-3.97881	AGKQSLTQ
FalsePositive	ACK37425	469	476	0.000113	-3.94692	PGAQGPTS
FalsePositive	ABV25903	60	67	0.000115	-3.9393	ALKEGAPV
FalsePositive	AUO29156	532	539	0.000115	-3.9393	AEVQNQSV
FalsePositive	AAX47043	233	240	0.000126	-3.89963	NKVQNAVW
FalsePositive	ADE80724	584	591	0.000129	-3.88941	ALTQALPT
FalsePositive	ABF51199	707	714	0.000131	-3.88273	AAVQGDDS
FalsePositive	ACK37392	1902	1909	0.000134	-3.8729	AFHQNPGI
FalsePositive	ACK37405	588	595	0.000143	-3.84466	NIKQSEPT
FalsePositive	AIK66522	789	796	0.000148	-3.82974	VNEQSPYT
FalsePositive	NP_653149	942	949	0.000149	-3.82681	VCFQGPGI
FalsePositive	ABF51180	465	472	0.000157	-3.8041	PGAQGPTN
FalsePositive	APX43287	228	235	0.000158	-3.80134	ASTQGVQT
FalsePositive	ABF51198	703	710	0.000158	-3.80134	AAAQGDDT
FalsePositive	AFL03399	41	48	0.000166	-3.77989	AGKQSLKQ
FalsePositive	AGV98964	1178	1185	0.000176	-3.75449	AASQGDLE
FalsePositive	AEO51784	41	48	0.000186	-3.73049	ASKQNFSQ
FalsePositive	YP_003358790	920	927	0.000188	-3.72584	VCFQGPGL
FalsePositive	AUF49622	414	421	0.000189	-3.72354	AGVQNNNQ
FalsePositive	ACK37430	463	470	0.000198	-3.70333	PGAQGPTK
FalsePositive	AAQ04841	230	237	0.000202	-3.69465	PSTQGNVQ
FalsePositive	NP_758520	1587	1594	0.000202	-3.69465	TDEQGVSL
FalsePositive	AMD82549	569	576	0.000204	-3.69037	NDVQNAID
FalsePositive	YP_009028564	1159	1166	0.000204	-3.69037	TLEQSAPS
FalsePositive	APR72754	1159	1166	0.000221	-3.65561	TIEQSAPS
FalsePositive	ACK37424	218	225	0.000225	-3.64782	PGEQGIEL
FalsePositive	AAX47041	790	797	0.000233	-3.63264	VNKQSPYT
FalsePositive	ABV25903	1494	1501	0.000238	-3.62342	ALIQSITT
FalsePositive	YP_003358790	1913	1920	0.00024	-3.61979	TFHQNPGV
FalsePositive	ABF51197	656	663	0.000242	-3.61618	DTTQGDYD
FalsePositive	ASU64357	929	936	0.000248	-3.60555	VSFEGPGF
FalsePositive	ARM53611	386	393	0.000264	-3.5784	VTTQSNPD
FalsePositive	AFO83469	532	539	0.000285	-3.54516	AEVQNQSI
FalsePositive	ACK37425	405	412	0.000293	-3.53313	PLTQGLKN
FalsePositive	AVK51671	1481	1488	0.000293	-3.53313	AIVQSVSL
FalsePositive	APT68359	66	73	0.000295	-3.53018	APLQSPSV
FalsePositive	APT69843	1026	1033	0.000305	-3.5157	AELQNISM
FalsePositive	AJO60891	1181	1188	0.000308	-3.51145	NMEQSAAS
FalsePositive	ACK37423	66	73	0.000311	-3.50724	PTLQSPSV
FalsePositive	ABF51197	705	712	0.000316	-3.50031	AAAQGNGI
FalsePositive	ACK37430	218	225	0.000324	-3.48945	PGEQGIDL
FalsePositive	ACK37444	218	225	0.000332	-3.47886	PGEQGINL
FalsePositive	AAD22045	1562	1569	0.000346	-3.46092	NISQGQTD
FalsePositive	AAX47040	789	796	0.000352	-3.45346	AKAQNVTS
FalsePositive	AHE93351	692	699	0.00036	-3.4437	TSYQGQGT
FalsePositive	APT69829	5	12	0.000363	-3.44009	VSRQNVGT
FalsePositive	AEC13062	41	48	0.000378	-3.42251	AGKQSFKQ
FalsePositive	AMD82094	386	393	0.000393	-3.40561	VRVQNDVD
FalsePositive	YP_009259673	395	402	0.000393	-3.40561	VSVQNEVD
FalsePositive	AAX47037	228	235	0.000397	-3.40121	VSTQGIQT
FalsePositive	AHX57698	1611	1618	0.000406	-3.39147	VDEQGINL
FalsePositive	ACK37408	1901	1908	0.000422	-3.37469	VFHQNPGI
FalsePositive	ACZ67658	5	12	0.000426	-3.37059	VSRQNNGT
FalsePositive	AUF49628	923	930	0.000426	-3.37059	VKFEGPGL
FalsePositive	ABF51195	229	236	0.000439	-3.35754	TREQNDKQ
FalsePositive	ACK37398	703	710	0.000439	-3.35754	AAAQGEDN
FalsePositive	ACK37388	1048	1055	0.000446	-3.35067	VRSQGDPA
FalsePositive	CRL46950	922	929	0.000449	-3.34775	VIFEGPGL
FalsePositive	AAL69631	390	397	0.000463	-3.33442	ISVQSDID
FalsePositive	AVJ35777	912	919	0.000463	-3.33442	VTFEGPGI
FalsePositive	ABF51185	370	377	0.000467	-3.33068	GQVQNLIE
FalsePositive	ABF51201	702	709	0.000474	-3.32422	ASKQGNNG
FalsePositive	AAF81252	925	932	0.000474	-3.32422	VTFEGPSL
FalsePositive	AKA64452	1475	1482	0.000474	-3.32422	AVLQSASL
FalsePositive	ABM21504	609	616	0.000478	-3.32057	NTQQSAPV
FalsePositive	AGV98962	1611	1618	0.000481	-3.31785	VDEQGVDL
FalsePositive	NP_042288	66	73	0.000492	-3.30803	PTLQSPTV
FalsePositive	AQM32742	1473	1480	0.000492	-3.30803	VDEQGVNL
FalsePositive	APT69810	385	392	0.000496	-3.30452	NLEQNVTN
FalsePositive	YP_003358790	394	401	0.000496	-3.30452	VSVQSDVD
FalsePositive	AEL31293	822	829	0.000496	-3.30452	TGTEGNYT
FalsePositive	AVI00675	888	895	0.0005	-3.30103	SDTQGPDN
FalsePositive	YP_009353025	386	393	0.000504	-3.29757	VTVQAEPD
FalsePositive	ACK37368	2059	2066	0.000507	-3.29499	IAEQGAIY
FalsePositive	AAA45762	707	714	0.000511	-3.29158	AAAQGNDS
FalsePositive	AFO64932	1702	1709	0.000511	-3.29158	NGHQGFSA
FalsePositive	AUD08546	233	240	0.000523	-3.2815	CTVQSIVT
FalsePositive	AJF23329	233	240	0.000523	-3.2815	NTVQSIVT
FalsePositive	ACK37420	1915	1922	0.000527	-3.27819	TFHQNPGI
FalsePositive	ABO69375	368	375	0.000542	-3.266	GQVQNLSE
FalsePositive	BAE20393	604	611	0.000542	-3.266	PSEQSVPN
FalsePositive	AAQ73088	928	935	0.000542	-3.266	VSFEGPGI
FalsePositive	AAQ73089	532	539	0.000546	-3.26281	ADVQNKST
FalsePositive	AAQ04840	569	576	0.000546	-3.26281	NDVQNAVE
FalsePositive	BAK57455	792	799	0.000546	-3.26281	VNEQNLGV
FalsePositive	ABV25903	397	404	0.00055	-3.25964	VSVQSEVD
FalsePositive	AAZ73345	687	694	0.00055	-3.25964	STSQGVTT
FalsePositive	AAL37156	923	930	0.00055	-3.25964	VVFEGPGL
FalsePositive	AAF21972	924	931	0.000555	-3.25571	VTFEGPGL
FalsePositive	AHK24839	5	12	0.000559	-3.25259	VSKQSNGT
FalsePositive	AFV92902	411	418	0.000559	-3.25259	PLQQGLAN
FalsePositive	ACD78149	41	48	0.000563	-3.24949	ASKQGFSP
FalsePositive	AAZ73345	844	851	0.000571	-3.24336	GQQQGAAF
FalsePositive	ACR14890	660	667	0.000575	-3.24033	ITYQGNAQ
FalsePositive	ACR14890	1436	1443	0.000575	-3.24033	CEKEGLIV
FalsePositive	ACK37368	1699	1706	0.000584	-3.23359	NGKQGFSA
FalsePositive	ABU62848	5	12	0.000588	-3.23062	VSKQNVGS
FalsePositive	ANZ02994	393	400	0.000588	-3.23062	VSVQSAVD
FalsePositive	AEO51783	611	618	0.000592	-3.22768	NTTQSFPE
FalsePositive	ACY40750	839	846	0.000592	-3.22768	TTRQSITT
FalsePositive	AMD82547	384	391	0.000601	-3.22113	TDVQGVSR
FalsePositive	AAQ73080	930	937	0.000601	-3.22113	VHFEGPGL
FalsePositive	ADK22846	950	957	0.000605	-3.21824	VSVEGPTF
FalsePositive	AEO51785	232	239	0.00061	-3.21467	ASAQANPT
FalsePositive	AQM32742	1035	1042	0.000614	-3.21183	NLEQSAAS
FalsePositive	AFO83469	177	184	0.000618	-3.20901	IHVQGNAS
FalsePositive	ACK37388	1674	1681	0.000618	-3.20901	NGRQGFSA
FalsePositive	AJC11330	395	402	0.000623	-3.20551	VSTQSDKD
FalsePositive	AKA64452	561	568	0.000623	-3.20551	DAVQGAIQ
FalsePositive	AUF49675	223	230	0.000627	-3.20273	SFEQNPAT
FalsePositive	AUD09233	799	806	0.000627	-3.20273	ASTEGDSL
FalsePositive	ANN02908	1489	1496	0.000627	-3.20273	AIIQSVSL
FalsePositive	ACI23463	232	239	0.000632	-3.19928	TEVQAAVW
FalsePositive	YP_009020973	201	208	0.000636	-3.19654	IQAQSNPT
FalsePositive	APT69824	535	542	0.000641	-3.19314	AIAQGSIL
FalsePositive	ABM54545	930	937	0.000641	-3.19314	SKAQGIDT
FalsePositive	AAQ73086	692	699	0.000645	-3.19044	TSTQGTPT
FalsePositive	APR72754	922	929	0.000645	-3.19044	VSFEGPGL
FalsePositive	ABM54520	927	934	0.00065	-3.18709	SKAQGIDQ
FalsePositive	AAW30685	244	251	0.000655	-3.18376	PLSQALIW
FalsePositive	AFR77805	1173	1180	0.000655	-3.18376	NIEQSAAS
FalsePositive	AAD46138	927	934	0.000659	-3.18111	VVFEGPGM
FalsePositive	APT69811	387	394	0.000664	-3.17783	NLEQNIRN
FalsePositive	ADW78250	386	393	0.000669	-3.17457	VSTQSDLD
FalsePositive	AAQ02679	611	618	0.000669	-3.17457	NTQQSAPS
FalsePositive	ARM53611	830	837	0.000669	-3.17457	PDRQSITT
FalsePositive	AUF49657	349	356	0.000673	-3.17198	DDFQSPSV
FalsePositive	ACK37445	385	392	0.000678	-3.16877	NLQQNISN
FalsePositive	AJB44634	1563	1570	0.000678	-3.16877	AMAHGEIQ
FalsePositive	AAL69631	1912	1919	0.000678	-3.16877	AMRQAFGN
FalsePositive	APT69846	203	210	0.000688	-3.16241	SHTQGNVS
FalsePositive	AGP03469	210	217	0.000688	-3.16241	VNAQGLSN
FalsePositive	ADU20413	798	805	0.000702	-3.15366	AQAEGDSL
FalsePositive	AEL31289	650	657	0.000722	-3.14146	TLNQGFYK
FalsePositive	ACK37443	534	541	0.000727	-3.13847	PQTQGQVY
FalsePositive	ACK37400	587	594	0.000727	-3.13847	NINQSNPT
FalsePositive	ABO69377	994	1001	0.000727	-3.13847	DMFQAEYQ
FalsePositive	AGA18496	5	12	0.000732	-3.13549	VSAQNNGT
FalsePositive	YP_009028564	393	400	0.000732	-3.13549	VSVQAEID
FalsePositive	ARC95293	386	393	0.000737	-3.13253	VSTQSELD
FalsePositive	ABV25903	580	587	0.000737	-3.13253	NTIQSAGT
FalsePositive	ACK37432	705	712	0.000737	-3.13253	AAAQGNDI
FalsePositive	AAQ73078	230	237	0.000747	-3.12668	SSAQGVVQ
FalsePositive	AFO83469	569	576	0.000747	-3.12668	NDVQSAVE
FalsePositive	ASZ69778	792	799	0.000747	-3.12668	VNEQSLGV
FalsePositive	BAW98046	1481	1488	0.000758	-3.12033	AVIQSVSL
FalsePositive	YP_009246449	818	825	0.000773	-3.11182	PIRQAPYK
FalsePositive	AIT57556	927	934	0.000773	-3.11182	SKAQGVDQ
FalsePositive	ABU62848	1780	1787	0.000778	-3.10902	TMEQAIYG
FalsePositive	ABF51205	228	235	0.000789	-3.10292	TGRQNATK
FalsePositive	ACK37397	388	395	0.000789	-3.10292	NLEQNIRK
FalsePositive	ACO89621	584	591	0.000789	-3.10292	ALTQALPA
FalsePositive	APQ46501	894	901	0.000789	-3.10292	TSTQGDDY
FalsePositive	AEO51782	603	610	0.000795	-3.09963	PAEQSVPN
FalsePositive	AAQ73084	649	656	0.000795	-3.09963	TEKQGEQI
FalsePositive	AFK79845	1906	1913	0.000811	-3.09098	CMEQNLLA
FalsePositive	CAA63480	210	217	0.000816	-3.08831	VNAQGLSK
FalsePositive	APW91090	561	568	0.000816	-3.08831	IEQQNFYQ
FalsePositive	AFO83469	1711	1718	0.000833	-3.07935	IGHQGFSA
FalsePositive	AAQ02675	1054	1061	0.000838	-3.07676	NTVQSVLT
FalsePositive	AMB19798	5	12	0.000844	-3.07366	VSRQSVGS
FalsePositive	AAQ73094	233	240	0.000844	-3.07366	NSVQAAVW
FalsePositive	AFK66746	386	393	0.000844	-3.07366	VSTQANPD
FalsePositive	ACI23463	1164	1171	0.00085	-3.07058	APSQGDQE
FalsePositive	ABM21516	410	417	0.000855	-3.06803	VQLQAAPS
FalsePositive	AUD09274	674	681	0.000855	-3.06803	APTQSASK
FalsePositive	AAF81252	697	704	0.000855	-3.06803	STTQGQDT
FalsePositive	AAR06974	697	704	0.000861	-3.065	STVQGQDT
FalsePositive	AJK93552	1173	1180	0.000861	-3.065	NLKQSAAS
FalsePositive	AAW30683	1180	1187	0.000861	-3.065	AASQSDLE
FalsePositive	CAA55650	792	799	0.000867	-3.06198	VNEQSPYA
FalsePositive	ACK37380	2058	2065	0.00089	-3.05061	ISEQGLKY
FalsePositive	ABM54528	598	605	0.000896	-3.04769	NTQQSLPN
FalsePositive	AVJ35777	723	730	0.000896	-3.04769	IFFQSNGV
FalsePositive	BAW98046	808	815	0.000896	-3.04769	APRQAPYK
FalsePositive	ACK37424	465	472	0.000902	-3.04479	PGTEGPKS
FalsePositive	ANN46830	932	939	0.000902	-3.04479	IHFEGPGI
FalsePositive	ANV28265	799	806	0.000908	-3.04191	AATEGDSL
FalsePositive	AJD14709	692	699	0.000914	-3.03905	TSTQGTST
FalsePositive	ACK37421	305	312	0.00092	-3.03621	GGTQSIPI
FalsePositive	AFQ55938	1512	1519	0.00092	-3.03621	SILQSLST
FalsePositive	ACU00185	1784	1791	0.00092	-3.03621	TMEQAVYG
FalsePositive	AFQ55938	1929	1936	0.00092	-3.03621	AMRQAFGH
FalsePositive	AUF49622	1057	1064	0.000926	-3.03339	TTVQSVLT
FalsePositive	ABF51186	1622	1629	0.000926	-3.03339	VANQSEPT
FalsePositive	BAG82822	115	122	0.000932	-3.03058	VKFEGDTL
FalsePositive	AFQ55938	591	598	0.000932	-3.03058	SITQNALT
FalsePositive	ALB73000	849	856	0.000932	-3.03058	TGLQGQQT
FalsePositive	AKL88020	923	930	0.000932	-3.03058	VAFEGPGL
FalsePositive	ACY40750	384	391	0.000938	-3.0278	VPVQNIGE
FalsePositive	AHK24838	1431	1438	0.000944	-3.02503	CEEEGLIL
FalsePositive	AVI00675	532	539	0.000956	-3.01954	QVTQGAIL
FalsePositive	AAQ73076	229	236	0.000963	-3.01637	NTNQNDVQ
FalsePositive	AAB02228	925	932	0.000963	-3.01637	ISFEGPGI
FalsePositive	AIA21703	386	393	0.000969	-3.01368	VNTQNDLD
FalsePositive	ABF51180	655	662	0.000969	-3.01368	ADIQNQKE
FalsePositive	ACK37439	702	709	0.000975	-3.011	VASQGDNN
FalsePositive	AUO29149	925	932	0.000975	-3.011	INFEGPGF
FalsePositive	ABV00677	935	942	0.000975	-3.011	IVFEGPGL
FalsePositive	AUD08527	935	942	0.000982	-3.00789	ITFEGPGL
FalsePositive	ACK37380	1025	1032	0.000982	-3.00789	TELQNISM
FalsePositive	BAM44539	1711	1718	0.000988	-3.00524	NGQQGFSA
FalsePositive	AAX47037	681	688	0.001	-3	TSTQADGT
FalsePositive	AEL31293	888	895	0.001	-3	CTAQGPDR
FalsePositive	ACK37384	699	706	0.00102	-2.9914	IAAQGDDV
FalsePositive	AJB44634	1687	1694	0.00102	-2.9914	NGAQGFSA
FalsePositive	YP_003358790	1698	1705	0.00102	-2.9914	NGHQGFAA
FalsePositive	YP_009028564	527	534	0.00103	-2.98716	APTQGSII
FalsePositive	AFR46521	921	928	0.00103	-2.98716	SRAQGIDT
FalsePositive	ACZ28901	922	929	0.00103	-2.98716	SKAQGIDS
FalsePositive	ABM54547	930	937	0.00103	-2.98716	SRAQGADT
FalsePositive	ACK37403	1902	1909	0.00103	-2.98716	SFHQNPGI
FalsePositive	ANZ02994	1913	1920	0.00103	-2.98716	TFHQNPGA
FalsePositive	ACK37412	387	394	0.00104	-2.98297	NNVQGNKN
FalsePositive	AUF49647	849	856	0.00104	-2.98297	TGPQGQQT
FalsePositive	AGX93075	927	934	0.00104	-2.98297	SRAQGIDQ
FalsePositive	ACK37420	1750	1757	0.00104	-2.98297	NVFEGNKQ
FalsePositive	AEA11175	41	48	0.00105	-2.97881	AGKQSLKR
FalsePositive	ACU00185	881	888	0.00105	-2.97881	SATQGPDH
FalsePositive	ACK37403	324	331	0.00105	-2.97881	ARNQSVKQ
FalsePositive	AZL41614	932	939	0.00105	-2.97881	IRFEGPGI
FalsePositive	AQV09961	233	240	0.00107	-2.97062	HTVQGIVT
FalsePositive	AFQ55916	554	561	0.00107	-2.97062	APIQNAVE
FalsePositive	AAT65964	573	580	0.00107	-2.97062	NAVEGVIT
FalsePositive	ABM54550	589	596	0.00107	-2.97062	TVAQNALQ
FalsePositive	AUF49662	395	402	0.00108	-2.96658	VSAQSAVD
FalsePositive	ACK37397	588	595	0.00108	-2.96658	NIKQSQAT
FalsePositive	AAQ02681	1515	1522	0.00109	-2.96257	SVLQSLST
FalsePositive	AFD33642	385	392	0.0011	-2.95861	VPVQNVGE
FalsePositive	ACK37413	225	232	0.00111	-2.95468	VGTQADDT
FalsePositive	ABF51182	465	472	0.00111	-2.95468	PGTEGPKN
FalsePositive	ACK37397	698	705	0.00111	-2.95468	IAAQGEDV
FalsePositive	ACK37412	1623	1630	0.00111	-2.95468	TANQSEPT
FalsePositive	ACK37414	296	303	0.00112	-2.95078	CQLQSNNT
FalsePositive	ACI23463	922	929	0.00112	-2.95078	ISFEGPGL
FalsePositive	ACK37417	405	412	0.00113	-2.94692	PLIQGQKN
FalsePositive	ABM54522	599	606	0.00113	-2.94692	TSQQSLPN
FalsePositive	AGA18494	921	928	0.00113	-2.94692	GRAQGIDT
FalsePositive	ARA15405	404	411	0.00114	-2.9431	ADRQNEQI
FalsePositive	ABM21515	410	417	0.00114	-2.9431	VQLQANPS
FalsePositive	AJO54282	704	711	0.00114	-2.9431	PGIEGPKD
FalsePositive	ABU41835	875	882	0.00114	-2.9431	TPVQNITT
FalsePositive	ABD97877	1785	1792	0.00114	-2.9431	CVFEGVKE
FalsePositive	AGA12372	799	806	0.00115	-2.9393	ASAEGDSL
FalsePositive	APT69830	587	594	0.00116	-2.93554	NINQSNPS
FalsePositive	YP_001715611	392	399	0.00116	-2.93554	ISVQSDLD
FalsePositive	ADK22846	1514	1521	0.00116	-2.93554	TIVQAISS
FalsePositive	APT68352	396	403	0.00118	-2.92812	VRAQNNVD
FalsePositive	AIZ97150	561	568	0.00118	-2.92812	ISQQNFYQ
FalsePositive	ACK37408	798	805	0.00118	-2.92812	TEQQSNTV
FalsePositive	APR72754	222	229	0.00119	-2.92445	SFEQNAAT
FalsePositive	BAG70421	838	845	0.00119	-2.92445	TARQNIRD
FalsePositive	CDQ47775	66	73	0.0012	-2.92082	APLQSPSA
FalsePositive	ABM21506	931	938	0.0012	-2.92082	SRAQGVDT
FalsePositive	AAA45756	404	411	0.00121	-2.91721	ANRQNEQV
FalsePositive	ABM54517	927	934	0.00122	-2.91364	SRAQGVDQ
FalsePositive	AFQ55916	721	728	0.00122	-2.91364	VFFQANGV
FalsePositive	ADK22846	411	418	0.00124	-2.90658	PLNQGTPT
FalsePositive	AGC54436	922	929	0.00124	-2.90658	VNFEGPGL
FalsePositive	BAM10196	1056	1063	0.00124	-2.90658	DTVQNVIT
FalsePositive	AQV09961	214	221	0.00125	-2.90309	AISEGEIA
FalsePositive	ANZ02994	1485	1492	0.00125	-2.90309	TILQAVST
FalsePositive	ABO69371	1576	1583	0.00125	-2.90309	CNKQGVKL
FalsePositive	AGT57426	332	339	0.00127	-2.8962	DDFQSPSI
FalsePositive	AAT65964	569	576	0.00128	-2.89279	GDVQNAVE
FalsePositive	AFK66746	821	828	0.00128	-2.89279	NVFQAEDF
FalsePositive	AAR38847	1763	1770	0.00128	-2.89279	NVFEGNKE
FalsePositive	ARO77045	907	914	0.00129	-2.88941	TGAQGSET
FalsePositive	AVK51671	364	371	0.0013	-2.88606	AQVESIVE
FalsePositive	ADK22846	2106	2113	0.0013	-2.88606	ATFEAVTW
FalsePositive	ACK37429	654	661	0.00131	-2.88273	ITIQNDVE
FalsePositive	AMK74873	934	941	0.00131	-2.88273	VYFEGPGI
FalsePositive	AFO83469	534	541	0.00132	-2.87943	VQNQSIIL
FalsePositive	ACR14890	1145	1152	0.00132	-2.87943	AFPQSPEA
FalsePositive	ABV25903	241	248	0.00132	-2.87943	ALSQALIY
FalsePositive	AJO54281	2138	2145	0.00132	-2.87943	PPYQSLYT
FalsePositive	ABM21512	604	611	0.00134	-2.8729	PPEQSVPN
FalsePositive	AAQ73089	647	654	0.00134	-2.8729	YKTQGDEQ
FalsePositive	AKR53677	241	248	0.00135	-2.86967	PLSQALIF
FalsePositive	ALB75014	851	858	0.00135	-2.86967	TIEQGEHR
FalsePositive	AAQ73076	233	240	0.00136	-2.86646	NDVQNVVH
FalsePositive	AGA18496	1514	1521	0.00136	-2.86646	TIVQAVSS
FalsePositive	ACK37426	1050	1057	0.00136	-2.86646	VRSQGDLA
FalsePositive	ADO24588	835	842	0.00137	-2.86328	NYKQNPEN
FalsePositive	ACU00186	1143	1150	0.00137	-2.86328	ATEQAQNE
FalsePositive	AAQ02681	232	239	0.00138	-2.86012	PDTQAPGK
FalsePositive	APT69834	391	398	0.00138	-2.86012	NTTQNLRK
FalsePositive	ASZ70601	1780	1787	0.00138	-2.86012	TLEQAAYG
FalsePositive	ACK37386	2059	2066	0.00138	-2.86012	IAQQGVIY
FalsePositive	YP_009028564	1600	1607	0.00139	-2.85699	TDQQGVNL
FalsePositive	AAF81252	400	407	0.0014	-2.85387	IPVQSNPT
FalsePositive	ATV91618	693	700	0.0014	-2.85387	TQEQSTIQ
FalsePositive	ACK37426	1212	1219	0.0014	-2.85387	VMFHGDPG
FalsePositive	ARC95292	1463	1470	0.0014	-2.85387	QSVQGIIY
FalsePositive	ABM21504	430	437	0.00141	-2.85078	ASEQRLGF
FalsePositive	ADW78250	41	48	0.00141	-2.85078	QNKQGITQ
FalsePositive	AFV83532	720	727	0.00141	-2.85078	PVPQSATS
FalsePositive	AUF49660	1045	1052	0.00141	-2.85078	IGSEGAIE
FalsePositive	BAW35376	931	938	0.00142	-2.84771	VCFEGPGI
FalsePositive	AFO83469	1761	1768	0.00144	-2.84164	PVFEGNKE
FalsePositive	ABV25903	1168	1175	0.00145	-2.83863	NLEQAAAS
FalsePositive	ARM53611	1784	1791	0.00145	-2.83863	VDEEGVSL
FalsePositive	ACK37383	298	305	0.00146	-2.83565	CPLQSEGT
FalsePositive	AAR38842	384	391	0.00146	-2.83565	TDVQGVNR
FalsePositive	ADR82077	799	806	0.00146	-2.83565	VSTEGDSL
FalsePositive	ACK37436	700	707	0.00147	-2.83268	IAAQNEGV
FalsePositive	ARO77045	855	862	0.00147	-2.83268	ATRESITT
FalsePositive	ABO69370	385	392	0.00147	-2.83268	NSVEGNTD
FalsePositive	ACK37413	894	901	0.00147	-2.83268	TNTQGDDY
FalsePositive	ALB72980	1045	1052	0.00147	-2.83268	IGTEGAVE
FalsePositive	ACK37386	835	842	0.00148	-2.82974	NYKQNPKN
FalsePositive	ARU09499	1042	1049	0.00149	-2.82681	VGSEGAVE
FalsePositive	AEK98148	386	393	0.00151	-2.82102	NNTEGESV
FalsePositive	AKC92706	799	806	0.00151	-2.82102	APTEGDSL
FalsePositive	ACK37430	202	209	0.00152	-2.81816	ASIEGANV
FalsePositive	AEO51787	1518	1525	0.00152	-2.81816	TILQAITT
FalsePositive	AAS86317	1563	1570	0.00152	-2.81816	AMAHGEVE
FalsePositive	AAL69631	1949	1956	0.00152	-2.81816	VLLEGELF
FalsePositive	BAM44538	534	541	0.00153	-2.81531	VQNQSVIL
FalsePositive	AMK74873	386	393	0.00154	-2.81248	NNTQNNLQ
FalsePositive	ALB72948	396	403	0.00154	-2.81248	VRAQSNVD
FalsePositive	AHL27172	932	939	0.00155	-2.80967	IAFEGPGL
FalsePositive	YP_009243645	374	381	0.00156	-2.80688	TDAQGLVR
FalsePositive	APQ46501	386	393	0.00156	-2.80688	NSTQSNIG
FalsePositive	AUO29153	405	412	0.00158	-2.80134	GNHQGDKI
FalsePositive	ABU41836	599	606	0.00158	-2.80134	SAQQSLPD
FalsePositive	AEO51781	611	618	0.00158	-2.80134	NTTQSSPE
FalsePositive	ACZ28902	922	929	0.00158	-2.80134	SRAQGIDS
FalsePositive	AAR38847	241	248	0.00159	-2.7986	PLSQSLIY
FalsePositive	ABM54529	414	421	0.00159	-2.7986	ATLESPIL
FalsePositive	AMB19800	846	853	0.00159	-2.7986	VHTQNAKY
FalsePositive	BAZ95883	925	932	0.00159	-2.7986	SRAQGADS
FalsePositive	APT69822	1776	1783	0.00159	-2.7986	TLEQAVYG
FalsePositive	AAX47044	692	699	0.0016	-2.79588	TSHQGTAT
FalsePositive	APR72754	848	855	0.0016	-2.79588	TGPQGQQS
FalsePositive	AFR77805	944	951	0.0016	-2.79588	VEVQANEF
FalsePositive	AEJ54595	1173	1180	0.0016	-2.79588	NLEQSAAA
FalsePositive	AAQ04834	1279	1286	0.0016	-2.79588	AEKEGTST
FalsePositive	ABO69381	401	408	0.00161	-2.79317	PLIQGQQE
FalsePositive	BAW98046	843	850	0.00161	-2.79317	GQQQGAAY
FalsePositive	ARC95293	961	968	0.00161	-2.79317	AGGQGVVG
FalsePositive	AGA18497	1056	1063	0.00161	-2.79317	DTVQSVIT
FalsePositive	ACU00185	531	538	0.00162	-2.79048	QTSQGAIL
FalsePositive	ABM21513	1521	1528	0.00162	-2.79048	TILQALTT
FalsePositive	ABF51189	702	709	0.00163	-2.78781	AQNEGVGH
FalsePositive	AIT57557	865	872	0.00163	-2.78781	DLKQGSIT
FalsePositive	ADD23216	923	930	0.00164	-2.78516	VCFEGPGL
FalsePositive	AFK29633	931	938	0.00165	-2.78252	VSFEGPGP
FalsePositive	NP_045756	364	371	0.00166	-2.77989	AQVESILE
FalsePositive	AUD09263	799	806	0.00166	-2.77989	ASNEGDSL
FalsePositive	AKH49408	1419	1426	0.00166	-2.77989	ISLQNPPP
FalsePositive	AMB57005	385	392	0.00167	-2.77728	VPVQNVEE
FalsePositive	ABV69564	693	700	0.00167	-2.77728	TQEQSSVQ
FalsePositive	AJO54282	1788	1795	0.00167	-2.77728	SMEQAVYG
FalsePositive	AFQ55937	1054	1061	0.00168	-2.77469	STVQSVLT
FalsePositive	AIZ97148	66	73	0.00169	-2.77211	APLQSPTA
FalsePositive	ACK37380	463	470	0.00169	-2.77211	PGAEGPTK
FalsePositive	ABB45874	561	568	0.00169	-2.77211	ITQQALYQ
FalsePositive	ACK37418	1026	1033	0.00169	-2.77211	AELQSTTT
FalsePositive	AFK79845	386	393	0.0017	-2.76955	NNIQNQIQ
FalsePositive	AAQ04839	405	412	0.00171	-2.767	GNHQGEKI
FalsePositive	ABM21516	611	618	0.00171	-2.767	NTQQSAPA
FalsePositive	AHL27172	654	661	0.00171	-2.767	GVEEGDTE
FalsePositive	ABM54517	865	872	0.00171	-2.767	DIKQGSIT
FalsePositive	ABV25903	1040	1047	0.00171	-2.767	VGSEGVVE
FalsePositive	AIA21703	1587	1594	0.00171	-2.767	TDEEGVSL
FalsePositive	AAP68876	799	806	0.00172	-2.76447	TSTEGDSL
FalsePositive	AAZ73345	1482	1489	0.00174	-2.75945	SVVQSISL
FalsePositive	ACR14890	534	541	0.00175	-2.75696	TIAQGSIL
FalsePositive	AEL31291	995	1002	0.00175	-2.75696	GFTQNIKD
FalsePositive	AUD09247	1514	1521	0.00175	-2.75696	TILQAVTT
FalsePositive	AJC11328	228	235	0.00176	-2.75449	GIFENPYI
FalsePositive	AFK66746	362	369	0.00176	-2.75449	CQVESIIE
FalsePositive	ABC69256	584	591	0.00176	-2.75449	VLTQALPA
FalsePositive	AGV98965	1045	1052	0.00176	-2.75449	TGSEGAVE
FalsePositive	AFR79234	204	211	0.00177	-2.75203	TNVQNAPA
FalsePositive	AUF49633	230	237	0.00178	-2.74958	TVSEGATD
FalsePositive	AAQ04837	598	605	0.00178	-2.74958	STQQSLPN
FalsePositive	YP_009028564	2082	2089	0.00179	-2.74715	AEFNNVTW
FalsePositive	AHJ78647	1532	1539	0.00181	-2.74232	APKQSLKK
FalsePositive	AQM32742	179	186	0.00182	-2.73993	GLRQAVSQ
FalsePositive	ABM54523	569	576	0.00185	-2.73283	ISQQALPQ
FalsePositive	APT69825	611	618	0.00185	-2.73283	ATPESVIE
FalsePositive	YP_009020973	1687	1694	0.00185	-2.73283	NGAQGFAA
FalsePositive	AFO42818	400	407	0.00187	-2.72816	IPVQSNST
FalsePositive	AAX47037	405	412	0.00187	-2.72816	TKKQAFGF
FalsePositive	ACK37370	588	595	0.00188	-2.72584	NIKESNPT
FalsePositive	AAQ73077	697	704	0.00188	-2.72584	IQEQGKAL
FalsePositive	ARM53611	177	184	0.00191	-2.71897	VHVQANAT
FalsePositive	AAR38844	224	231	0.00191	-2.71897	PGKEGQVF
FalsePositive	AMB57008	925	932	0.00191	-2.71897	VSIEGPGL
FalsePositive	AKE33310	1640	1647	0.00191	-2.71897	AKEEAEVT
FalsePositive	AVK78347	388	395	0.00192	-2.7167	NNIQGEVG
FalsePositive	YP_001715611	576	583	0.00192	-2.7167	NKIEGLSN
FalsePositive	AEE25815	588	595	0.00192	-2.7167	SVAQNALQ
FalsePositive	APU51954	1500	1507	0.00192	-2.7167	VTLQAIAT
FalsePositive	AJO54281	652	659	0.00193	-2.71444	ALDQGFLK
FalsePositive	APT69812	654	661	0.00193	-2.71444	ITIQNNVE
FalsePositive	CAA74807	1042	1049	0.00193	-2.71444	TRSQGDVP
FalsePositive	AFD32987	1561	1568	0.00193	-2.71444	NIKQAQTD
FalsePositive	AIZ97149	394	401	0.00194	-2.7122	VPVQSQSE
FalsePositive	ACD78137	45	52	0.00195	-2.70997	DFSQGPTK
FalsePositive	ACK37419	392	399	0.00195	-2.70997	NTSQNLRN
FalsePositive	ACU00186	995	1002	0.00195	-2.70997	GFTQNIRD
FalsePositive	ACT89356	1578	1585	0.00195	-2.70997	CNSQGVKL
FalsePositive	ABF51203	1704	1711	0.00195	-2.70997	VKEHGFPT
FalsePositive	AGC54436	402	409	0.00196	-2.70774	IPVQSNSD
FalsePositive	ABF51180	404	411	0.00196	-2.70774	ANRQNDQI
FalsePositive	AUN27641	357	364	0.00197	-2.70553	IHIQGEVR
FalsePositive	APT69811	697	704	0.00197	-2.70553	IAAQGEDI
FalsePositive	APT69822	5	12	0.00198	-2.70333	VSKQSVGA
FalsePositive	AAS86318	341	348	0.002	-2.69897	PKFQASPE
FalsePositive	AUF49642	925	932	0.002	-2.69897	INFEGPGL
FalsePositive	AMB19799	535	542	0.00201	-2.6968	TTGQGAIL
FalsePositive	ALB72930	1560	1567	0.00201	-2.6968	NIRQAQTD
FalsePositive	AIA21703	961	968	0.00203	-2.6925	AGGQGVVC
FalsePositive	APT69843	385	392	0.00204	-2.69037	NNAQGVTG
FalsePositive	YP_009344963	576	583	0.00204	-2.69037	ATEHNIST
FalsePositive	AAR38841	1041	1048	0.00204	-2.69037	IGSEGAVD
FalsePositive	ACK37398	1422	1429	0.00204	-2.69037	IDLQSPPP
FalsePositive	BAM71643	1522	1529	0.00204	-2.69037	TVLQAVTT
FalsePositive	AAL37156	223	230	0.00205	-2.68825	QFEQNAVT
FalsePositive	ACK37439	1216	1223	0.00205	-2.68825	VMFHGNPG
FalsePositive	AJC11325	228	235	0.00206	-2.68613	GTFENPYI
FalsePositive	ABM54545	797	804	0.00207	-2.68403	VPLEGEST
FalsePositive	AHK24839	650	657	0.00208	-2.68194	TLREGFTE
FalsePositive	ABO69380	22	29	0.0021	-2.67778	GSTQNFTV
FalsePositive	ANN46827	932	939	0.0021	-2.67778	IYFEGPGI
FalsePositive	ACK37408	323	330	0.00213	-2.67162	ARNQSVKI
FalsePositive	ABF51196	1159	1166	0.00213	-2.67162	SSTQGKIK
FalsePositive	ACK37401	1567	1574	0.00215	-2.66756	TKVEGSYD
FalsePositive	ADO24588	2059	2066	0.00215	-2.66756	IAQQGVTY
FalsePositive	AJR20996	649	656	0.00216	-2.66555	TKENGDIE
FalsePositive	AAF05693	2109	2116	0.00216	-2.66555	NIHESIRW
FalsePositive	APT69812	228	235	0.00217	-2.66354	ARTQNSEN
FalsePositive	ACV51798	385	392	0.00217	-2.66354	NNIQSQIQ
FalsePositive	AAF81252	693	700	0.00217	-2.66354	TQEQSTTQ
FalsePositive	ANZ02994	1163	1170	0.00217	-2.66354	APSQNDQE
FalsePositive	APT69821	2048	2055	0.00217	-2.66354	TQFQLVTW
FalsePositive	ABV25903	317	324	0.00219	-2.65956	GLRQAITQ
FalsePositive	ABF51191	386	393	0.00219	-2.65956	NNLEGNIT
FalsePositive	AEO51786	611	618	0.00219	-2.65956	DTQQSAPV
FalsePositive	AHK24839	1011	1018	0.00219	-2.65956	QISQSISD
FalsePositive	AGA18499	1190	1197	0.00219	-2.65956	CPSQGEQE
FalsePositive	ABM21507	1522	1529	0.00219	-2.65956	IILQALTT
FalsePositive	YP_003358790	2078	2085	0.00219	-2.65956	ATFNNVTW
FalsePositive	ACK37368	838	845	0.0022	-2.65758	QSPQNPIK
FalsePositive	ACV51798	1776	1783	0.0022	-2.65758	TSEQAVYG
FalsePositive	AIN45139	345	352	0.00222	-2.65365	DDFQSPSA
FalsePositive	APT69827	400	407	0.00223	-2.6517	PLVQNQQE
FalsePositive	BAE20393	611	618	0.00223	-2.6517	NTVQSTPE
FalsePositive	ACK37388	1210	1217	0.00223	-2.6517	IMFHGDPG
FalsePositive	YP_009020973	1473	1480	0.00223	-2.6517	IILQSATL
FalsePositive	ALP31164	1500	1507	0.00225	-2.64782	TTLQAIAT
FalsePositive	ACV51798	302	309	0.00226	-2.64589	GSPQSLPI
FalsePositive	AEL31292	388	395	0.00226	-2.64589	NQSQAIGI
FalsePositive	ACK37433	794	801	0.00226	-2.64589	TEEHGPRV
FalsePositive	ABF51189	1216	1223	0.00226	-2.64589	IMVHGPPG
FalsePositive	AJC11330	241	248	0.00227	-2.64397	PLSQALVF
FalsePositive	APQ46501	296	303	0.00227	-2.64397	CQLQSNNI
FalsePositive	AIZ97149	396	403	0.00227	-2.64397	VQSQSEKG
FalsePositive	QEG13939	931	938	0.00227	-2.64397	ICFEGPGI
FalsePositive	CAA29172	1456	1463	0.00227	-2.64397	VDRQAIRE
FalsePositive	AGX93075	865	872	0.00228	-2.64207	DLKQGTIT
FalsePositive	APU57649	229	236	0.00231	-2.63639	NREQANNQ
FalsePositive	ACK37389	391	398	0.00231	-2.63639	NTAQNLRK
FalsePositive	AUO29149	840	847	0.00231	-2.63639	TTRQSITA
FalsePositive	ACK37408	1222	1229	0.00231	-2.63639	VLFHGDPG
FalsePositive	YP_009344963	374	381	0.00232	-2.63451	ADVEGAKR
FalsePositive	AAQ73089	400	407	0.00233	-2.63264	IPVQSVTQ
FalsePositive	AGT57426	602	609	0.00233	-2.63264	ASDEGLIE
FalsePositive	ASZ70601	376	383	0.00234	-2.63078	AMVESLIP
FalsePositive	CDQ47775	380	387	0.00234	-2.63078	NLTENESN
FalsePositive	AAR06974	693	700	0.00234	-2.63078	TQEQSTVQ
FalsePositive	AFO42820	697	704	0.00234	-2.63078	STIQGQDS
FalsePositive	APQ46501	227	234	0.00236	-2.62709	TQVENEKQ
FalsePositive	ACF21979	379	386	0.00236	-2.62709	NNLQSNET
FalsePositive	ACK37409	404	411	0.00236	-2.62709	PNRQGEMV
FalsePositive	APZ85757	654	661	0.00236	-2.62709	GEEEGDTK
FalsePositive	AFK66746	725	732	0.00236	-2.62709	VFFQANNV
FalsePositive	NP_653149	1507	1514	0.00236	-2.62709	IILQAVTT
FalsePositive	AQM32742	907	914	0.00237	-2.62525	IGSEGAVE
FalsePositive	AUO29155	223	230	0.00238	-2.62342	QFEQNAAT
FalsePositive	YP_009259673	241	248	0.00238	-2.62342	PISQALVF
FalsePositive	ARR29308	571	578	0.00239	-2.6216	NAVEGAVS
FalsePositive	ABM54518	865	872	0.00239	-2.6216	DIKQGTIT
FalsePositive	ANJ61578	1499	1506	0.00239	-2.6216	ITLQAITT
FalsePositive	AFR77803	293	300	0.00241	-2.61798	AYNEGATT
FalsePositive	ABM53474	389	396	0.00241	-2.61798	NNVQGNLR
FalsePositive	AFK29633	488	495	0.00241	-2.61798	IGLQSSYV
FalsePositive	APT69811	587	594	0.00241	-2.61798	DIKQSQST
FalsePositive	ADU20413	796	803	0.00241	-2.61798	GQAQAEGD
FalsePositive	AQX36825	403	410	0.00242	-2.61618	VGVQAVSA
FalsePositive	ABM54530	414	421	0.00242	-2.61618	ANLENPIL
FalsePositive	AJO54281	1156	1163	0.00242	-2.61618	AQQQLIIE
FalsePositive	AGC03216	1169	1176	0.00242	-2.61618	TIDQSAPS
FalsePositive	ABO69377	2060	2067	0.00242	-2.61618	IAQQGAKY
FalsePositive	AAR38841	557	564	0.00243	-2.61439	VTQQAILQ
FalsePositive	APT69827	1026	1033	0.00243	-2.61439	SELQNITM
FalsePositive	ACK37392	1802	1809	0.00243	-2.61439	TMEESVYG
FalsePositive	ALB72985	177	184	0.00244	-2.61261	IRVQSNAS
FalsePositive	ACK37374	298	305	0.00244	-2.61261	CQLEGDPP
FalsePositive	ABF51200	664	671	0.00244	-2.61261	AEDQNFSK
FalsePositive	ACK37414	1210	1217	0.00244	-2.61261	VMIHGPPG
FalsePositive	AUF49674	226	233	0.00246	-2.60906	STTQSDQT
FalsePositive	ALB72935	606	613	0.00246	-2.60906	PSLQAAET
FalsePositive	ABV25904	706	713	0.00246	-2.60906	STGQGPNV
FalsePositive	AAR98503	388	395	0.00247	-2.6073	ISVQADLD
FalsePositive	AEK80016	586	593	0.00247	-2.6073	TLSQSIGR
FalsePositive	APT69841	1215	1222	0.00248	-2.60555	VLFHGEPG
FalsePositive	ARM53611	1466	1473	0.00248	-2.60555	QSVQGLVY
FalsePositive	BAG70420	233	240	0.0025	-2.60206	TKIQSVVH
FalsePositive	AEK98143	316	323	0.0025	-2.60206	GLRQAVTQ
FalsePositive	APT69841	796	803	0.0025	-2.60206	TEQQANTV
FalsePositive	AFK79845	323	330	0.00251	-2.60033	GAKQNQTQ
FalsePositive	ANV28240	582	589	0.00251	-2.60033	DMIEGAIE
FalsePositive	AIN45139	644	651	0.00251	-2.60033	YSTQGEDQ
FalsePositive	AUN27642	233	240	0.00252	-2.5986	NTVQAIVI
FalsePositive	AFY09605	347	354	0.00252	-2.5986	DEFQSPSP
FalsePositive	AAQ73092	388	395	0.00252	-2.5986	NIQQNLQS
FalsePositive	AKD28015	400	407	0.00252	-2.5986	IPVQSIAT
FalsePositive	YP_009020973	986	993	0.00254	-2.59517	DYVQGLGN
FalsePositive	ACK37382	327	334	0.00255	-2.59346	AKPEAASQ
FalsePositive	ACK37444	904	911	0.00256	-2.59176	TGAQGSEI
FalsePositive	ABF51191	405	412	0.00258	-2.58838	STEQSKIF
FalsePositive	AAS86318	1473	1480	0.00258	-2.58838	IVLQSATL
FalsePositive	AMB56999	563	570	0.00259	-2.5867	ITQQNFLQ
FalsePositive	AEL31289	1698	1705	0.00259	-2.5867	VGVEGISP
FalsePositive	ABF51202	1219	1226	0.0026	-2.58503	VIFHGEPG
FalsePositive	AAR38848	208	215	0.00262	-2.5817	DKPQNAPH
FalsePositive	ACK37399	588	595	0.00262	-2.5817	NIRESQPT
FalsePositive	AFK79845	747	754	0.00262	-2.5817	SNEQGNTR
FalsePositive	ACK37374	384	391	0.00263	-2.58004	NNLQANIT
FalsePositive	ACK37387	664	671	0.00263	-2.58004	NFTQWPIN
FalsePositive	AUF49632	840	847	0.00263	-2.58004	TTRQSVTA
FalsePositive	AVI00674	1147	1154	0.00263	-2.58004	QQVQGFAH
FalsePositive	AAQ73097	214	221	0.00264	-2.5784	ALSEGERA
FalsePositive	AJD80555	226	233	0.00264	-2.5784	STTQSEQT
FalsePositive	AAQ73096	405	412	0.00264	-2.5784	GNYQGEKI
FalsePositive	AFQ55916	558	565	0.00264	-2.5784	NAVENAIV
FalsePositive	ACK37406	838	845	0.00264	-2.5784	VPKEGDIK
FalsePositive	AJO54282	231	238	0.00266	-2.57512	NRGQNNPD
FalsePositive	ABO69381	531	538	0.00267	-2.57349	GTNQNVYI
FalsePositive	ALB73007	697	704	0.00267	-2.57349	IQEQGTAL
FalsePositive	ABV25904	802	809	0.00267	-2.57349	VGSENITT
FalsePositive	AFQ55937	1679	1686	0.00267	-2.57349	VVEQGMLN
FalsePositive	ACT89356	2035	2042	0.00267	-2.57349	DMAEGASE
FalsePositive	AAV41051	317	324	0.00269	-2.57025	GLRQAVVQ
FalsePositive	AHG06624	364	371	0.00269	-2.57025	VQVESIVE
FalsePositive	ABV25904	1044	1051	0.00269	-2.57025	IGSEGVVE
FalsePositive	AFV92902	1681	1688	0.00269	-2.57025	VTEQGMLN
FalsePositive	AJO54282	18	25	0.0027	-2.56864	TATQGSVI
FalsePositive	AHJ40480	204	211	0.0027	-2.56864	TNVENAPT
FalsePositive	AVJ35777	556	563	0.0027	-2.56864	NPVEGAIN
FalsePositive	ACF21979	778	785	0.0027	-2.56864	AHPQSNDA
FalsePositive	AMB19798	1775	1782	0.00271	-2.56703	SLEQAVYG
FalsePositive	AAV54187	2098	2105	0.00271	-2.56703	VTRENATF
FalsePositive	AAQ73080	231	238	0.00273	-2.56384	TGVQANVI
FalsePositive	ACK37443	408	415	0.00273	-2.56384	ANQQNQKI
FalsePositive	ARM53611	783	790	0.00273	-2.56384	PLAEGETI
FalsePositive	AIT57556	1623	1630	0.00273	-2.56384	TDAQALVD
FalsePositive	APT69824	1148	1155	0.00274	-2.56225	AFPQSSET
FalsePositive	NP_040958	1164	1171	0.00274	-2.56225	APSQSDQE
FalsePositive	APT69844	2060	2067	0.00274	-2.56225	IAQQGVKY
FalsePositive	AKU75641	1012	1019	0.00275	-2.56067	NYIQNLGN
FalsePositive	ABV25904	395	402	0.00277	-2.55752	VSVQSSVD
FalsePositive	AQM32742	419	426	0.00277	-2.55752	VTQQAVLQ
FalsePositive	AAQ73089	233	240	0.00278	-2.55596	NGVQAAVY
FalsePositive	ADG57602	316	323	0.00278	-2.55596	GLRQAIKQ
FalsePositive	AAQ73093	233	240	0.0028	-2.55284	NEVQAAAH
FalsePositive	AHF48784	600	607	0.0028	-2.55284	TTTNGLPD
FalsePositive	APT69828	2060	2067	0.0028	-2.55284	AFKQLDYS
FalsePositive	ALF95160	327	334	0.00281	-2.55129	AEFNGLRN
FalsePositive	AAQ73097	560	567	0.00281	-2.55129	ITQQAFYQ
FalsePositive	AKA64452	575	582	0.00281	-2.55129	ASTHNIST
FalsePositive	AAQ04835	797	804	0.00281	-2.55129	VPLEGETT
FalsePositive	CAJ01903	799	806	0.00281	-2.55129	TSAEGDSL
FalsePositive	ABM54523	882	889	0.00283	-2.54821	IGHQNKAV
FalsePositive	AJO54282	1015	1022	0.00283	-2.54821	QLSQSITD
FalsePositive	ANN02908	361	368	0.00284	-2.54668	VQVESLVE
FalsePositive	ABF51179	465	472	0.00284	-2.54668	PGTRGPED
FalsePositive	AHE93351	573	580	0.00284	-2.54668	TATENAIV
FalsePositive	AAQ02675	598	605	0.00284	-2.54668	TTVQNTTQ
FalsePositive	ACK37389	652	659	0.00284	-2.54668	STIQSNEQ
FalsePositive	AIT57556	1182	1189	0.00284	-2.54668	TMLENQIS
FalsePositive	YP_001552411	321	328	0.00286	-2.54363	GARQSVKQ
FalsePositive	ALB72934	759	766	0.00286	-2.54363	AAYQWFYD
FalsePositive	AAS86317	564	571	0.00287	-2.54212	ALKQAVHK
FalsePositive	AHE37949	1763	1770	0.00287	-2.54212	DIFEGDKE
FalsePositive	YP_009353025	362	369	0.00288	-2.54061	CQVESIVE
FalsePositive	AUF49657	563	570	0.00288	-2.54061	ISQQNFLQ
FalsePositive	ANP43761	507	514	0.0029	-2.5376	RMVQNDPY
FalsePositive	ACK37432	13	20	0.00291	-2.53611	HSTQNAVT
FalsePositive	AGA12360	799	806	0.00291	-2.53611	SSTEGDSL
FalsePositive	ARC95293	1450	1457	0.00291	-2.53611	AIFQLLKS
FalsePositive	AFQ55938	498	505	0.00293	-2.53313	VGLQSSAT
FalsePositive	AJD77367	1106	1113	0.00293	-2.53313	PIAQNQSA
FalsePositive	AGS09857	1294	1301	0.00293	-2.53313	YKQQGVII
FalsePositive	AWW21317	1501	1508	0.00293	-2.53313	IILQAVAT
FalsePositive	AUF49622	1943	1950	0.00293	-2.53313	KFHQNPGT
FalsePositive	BBD13572	368	375	0.00294	-2.53165	VEIQNVDG
FalsePositive	ANZ02994	939	946	0.00294	-2.53165	ARYQANVL
FalsePositive	AFV83532	234	241	0.00296	-2.52871	GKVQNAVC
FalsePositive	ACU00185	612	619	0.00296	-2.52871	VIPESLIE
FalsePositive	APT69821	1436	1443	0.00296	-2.52871	CEQEGLIA
FalsePositive	AEL31289	1828	1835	0.00296	-2.52871	TKLQNMID
FalsePositive	AEJ54593	66	73	0.00297	-2.52724	PPLQSPSA
FalsePositive	BBD13572	403	410	0.00297	-2.52724	PGTNGPLQ
FalsePositive	QEG13945	1499	1506	0.00297	-2.52724	ITLQAIAT
FalsePositive	AAQ73077	93	100	0.00299	-2.52433	TTQEGANV
FalsePositive	AJO54281	534	541	0.00299	-2.52433	TAGQGAIL
FalsePositive	AAQ73085	647	654	0.00299	-2.52433	YHTQNDSE
FalsePositive	AAQ04834	931	938	0.00299	-2.52433	SKAQGSDQ
FalsePositive	AGA18498	1681	1688	0.00299	-2.52433	VSEQGMLN
FalsePositive	AUD08541	348	355	0.003	-2.52288	DDFQSPTA
FalsePositive	AVQ54967	394	401	0.003	-2.52288	IPVQSQSE
FalsePositive	AEB33908	564	571	0.003	-2.52288	AIKQAVHK
FalsePositive	ABM21508	611	618	0.003	-2.52288	NTLQSTPE
FalsePositive	AJQ21580	729	736	0.003	-2.52288	NSRESLAW
FalsePositive	AJO54281	885	892	0.003	-2.52288	SETEGPDH
FalsePositive	ACK37433	403	410	0.00302	-2.51999	VERQADLM
FalsePositive	ACU00186	1822	1829	0.00302	-2.51999	TKLQKIID
FalsePositive	ACK37443	218	225	0.00303	-2.51856	PGDQGIDL
FalsePositive	APT69838	844	851	0.00303	-2.51856	PVRESPRQ
FalsePositive	AVJ35777	362	369	0.00305	-2.5157	CQVESLVE
FalsePositive	AFK66746	561	568	0.00305	-2.5157	ATLQNTVN
FalsePositive	AIB00393	572	579	0.00305	-2.5157	IEQQALAQ
FalsePositive	AFQ55938	598	605	0.00305	-2.5157	TTVQNTVQ
FalsePositive	BAM44538	720	727	0.00305	-2.5157	PIPQAVDD
FalsePositive	AAX47042	5	12	0.00306	-2.51428	VSTQKAGT
FalsePositive	ACK37439	298	305	0.00306	-2.51428	CSLQSEAG
FalsePositive	ABM54543	677	684	0.00306	-2.51428	ATTESDKK
FalsePositive	APT69827	845	852	0.00306	-2.51428	PKRNGIST
FalsePositive	AEO51782	930	937	0.00306	-2.51428	SKAQGVDR
FalsePositive	ABV25903	1174	1181	0.00306	-2.51428	ASQESLEQ
FalsePositive	ABM54517	1275	1282	0.00306	-2.51428	AEKENSSV
FalsePositive	AHK24839	388	395	0.00308	-2.51145	NNIEGETT
FalsePositive	AAX47042	935	942	0.00308	-2.51145	VYLEGPGL
FalsePositive	ABM54546	1556	1563	0.00308	-2.51145	NKKPGVPT
FalsePositive	BAD89964	316	323	0.0031	-2.50864	GLRQAVAQ
FalsePositive	AGW83677	599	606	0.0031	-2.50864	NSTNGVPD
FalsePositive	AAQ73082	692	699	0.0031	-2.50864	RQEQGAKL
FalsePositive	APT69838	485	492	0.00311	-2.50724	VGLQSTIS
FalsePositive	ANV28256	600	607	0.00311	-2.50724	TSTNGLPD
FalsePositive	AEK98148	693	700	0.00311	-2.50724	TQEQSTIH
FalsePositive	AVJ35777	830	837	0.00311	-2.50724	TDRENLTT
FalsePositive	AHK24835	904	911	0.00311	-2.50724	TNTEGDDV
FalsePositive	ACK37408	906	913	0.00311	-2.50724	TNTEGDDF
FalsePositive	AKU75647	1949	1956	0.00311	-2.50724	VLLNGEIF
FalsePositive	AFV92902	2106	2113	0.00311	-2.50724	TTFEAVTW
FalsePositive	ACZ67658	195	202	0.00313	-2.50446	PEHQLAYV
FalsePositive	ACR14890	323	330	0.00313	-2.50446	GARQSNKT
FalsePositive	ALB72926	1285	1292	0.00313	-2.50446	ALCQNPDG
FalsePositive	AFQ91921	18	25	0.00314	-2.50307	SATEGPTI
FalsePositive	APX43287	405	412	0.00314	-2.50307	SKKQAFGF
FalsePositive	ADG57605	316	323	0.00316	-2.50031	GLRQAVKQ
FalsePositive	ACK37423	1415	1422	0.00316	-2.50031	ITLEGPPP
FalsePositive	ALC04480	1165	1172	0.00317	-2.49894	PLLENQIT
FalsePositive	ANQ44598	627	634	0.00319	-2.49621	ASGQAIPS
FalsePositive	ACK37388	346	353	0.00321	-2.49349	DDMQSPSV
FalsePositive	AIE89768	525	532	0.00321	-2.49349	VVPNGAPT
FalsePositive	ACK37388	1127	1134	0.00321	-2.49349	PQAQNKIK
FalsePositive	ACV51798	1536	1543	0.00321	-2.49349	THAQAEDT
FalsePositive	AEL31293	11	18	0.00322	-2.49214	GSHENAIT
FalsePositive	AQM32742	103	110	0.00322	-2.49214	PLSQALIY
FalsePositive	AOR57086	703	710	0.00322	-2.49214	AERNGNTS
FalsePositive	APT69821	882	889	0.00322	-2.49214	AEVPGDDV
FalsePositive	AFK79845	1362	1369	0.00322	-2.49214	VVLQNKRT
FalsePositive	ACK37405	1562	1569	0.00322	-2.49214	VQINGIIT
FalsePositive	AAB02228	1755	1762	0.00322	-2.49214	QVFEGDKE
FalsePositive	ABM53473	408	415	0.00324	-2.48945	QTSQGAQV
FalsePositive	AQM32742	471	478	0.00324	-2.48945	PALQAAET
FalsePositive	AHL77761	849	856	0.00324	-2.48945	TGLQGQQA
FalsePositive	ACK37392	348	355	0.00325	-2.48812	DDTQSPSA
FalsePositive	ABU41836	606	613	0.00325	-2.48812	DTNQSLPV
FalsePositive	ACU00186	609	616	0.00325	-2.48812	VRPENLIE
FalsePositive	AEL31291	1115	1122	0.00325	-2.48812	PTVQSKKT
FalsePositive	AUO29150	1123	1130	0.00325	-2.48812	AKIQKFIE
FalsePositive	AUD08531	233	240	0.00327	-2.48545	HTVQSIVT
FalsePositive	AJO54282	567	574	0.00327	-2.48545	ALQNNDPV
FalsePositive	ABF51199	393	400	0.00329	-2.4828	NKEENVKS
FalsePositive	ABF51200	656	663	0.00329	-2.4828	NHEEGKYN
FalsePositive	AVM86034	1640	1647	0.00329	-2.4828	AKEEAEVN
FalsePositive	AJC11328	1759	1766	0.00329	-2.4828	DVFEGDKE
FalsePositive	ACK37433	203	210	0.0033	-2.48149	AAERGNVT
FalsePositive	ACT89355	651	658	0.0033	-2.48149	IVEHGEGV
FalsePositive	AAQ73093	229	236	0.00332	-2.47886	TTGQNEVQ
FalsePositive	AAR38848	317	324	0.00332	-2.47886	GLRQAVLQ
FalsePositive	AAQ02681	572	579	0.00332	-2.47886	ITQQALTV
FalsePositive	ACK37388	696	703	0.00332	-2.47886	AATEGNLG
FalsePositive	BAW98045	1258	1265	0.00332	-2.47886	DLHQNPDG
FalsePositive	ACU00185	5	12	0.00334	-2.47625	VSKQNTGS
FalsePositive	AUF49624	233	240	0.00334	-2.47625	GAVQNAVH
FalsePositive	ACK37401	298	305	0.00334	-2.47625	SKLQADNT
FalsePositive	ARM53611	371	378	0.00334	-2.47625	NNVQSAGR
FalsePositive	AAQ02678	430	437	0.00334	-2.47625	ASEQRLGY
FalsePositive	ALB72930	594	601	0.00334	-2.47625	ANTQSSSH
FalsePositive	ACT89356	701	708	0.00334	-2.47625	VAGQGNDT
FalsePositive	ABO69379	202	209	0.00335	-2.47496	ASHEGSNV
FalsePositive	AAX47042	210	217	0.00335	-2.47496	VVEESLSK
FalsePositive	ACK37414	644	651	0.00335	-2.47496	CIHESILD
FalsePositive	CAD38168	652	659	0.00335	-2.47496	GTQEGDTE
FalsePositive	AGX93075	1182	1189	0.00335	-2.47496	TMLENQIN
FalsePositive	ACS88253	1945	1952	0.00335	-2.47496	AFHNNPGV
FalsePositive	ACK37439	1140	1147	0.00337	-2.47237	TYIQSLKQ
FalsePositive	ALP31151	1500	1507	0.00337	-2.47237	ITLQAVAT
FalsePositive	AFD32988	569	576	0.00339	-2.4698	SPVEGAIE
FalsePositive	ABV69564	697	704	0.00339	-2.4698	SSVQGQDA
FalsePositive	ABF51182	853	860	0.00339	-2.4698	AKRESLHT
FalsePositive	ACK37391	229	236	0.0034	-2.46852	NRDQNDKQ
FalsePositive	ABA43708	576	583	0.0034	-2.46852	NTVESDIK
FalsePositive	ACK37393	1588	1595	0.0034	-2.46852	VLVNGQPV
FalsePositive	AIK66521	315	322	0.00342	-2.46597	APMQAEYN
FalsePositive	AUD08543	210	217	0.00344	-2.46344	VNEHGISD
FalsePositive	ACK37430	552	559	0.00344	-2.46344	KDTQSIYQ
FalsePositive	AMH87228	643	650	0.00344	-2.46344	AEFQLQSK
FalsePositive	ASZ70601	1431	1438	0.00344	-2.46344	CEDEGLIV
FalsePositive	AFY09605	379	386	0.00345	-2.46218	SDSEGPVN
FalsePositive	AWW21307	621	628	0.00345	-2.46218	TLVENFIS
FalsePositive	ABM54528	792	799	0.00345	-2.46218	VPIEGETT
FalsePositive	BAW98047	551	558	0.00347	-2.45967	ISQEGALQ
FalsePositive	ANP43768	649	656	0.00349	-2.45717	TKENGDIK
FalsePositive	AGV98963	705	712	0.00349	-2.45717	AKPNGELV
FalsePositive	AIB00583	1942	1949	0.00349	-2.45717	AFHRNPGV
FalsePositive	ACK37409	465	472	0.0035	-2.45593	PGANGPTT
FalsePositive	AIN45139	818	825	0.0035	-2.45593	CEYQSKSN
FalsePositive	ACK37391	1415	1422	0.0035	-2.45593	ISLEGPPP
FalsePositive	ABK88241	1502	1509	0.0035	-2.45593	IALQAITT
FalsePositive	AGW83676	881	888	0.00352	-2.45346	SGHQNKAV
FalsePositive	ABU62849	323	330	0.00354	-2.451	GARQSNKV
FalsePositive	ACK37386	346	353	0.00354	-2.451	DDRQSPSA
FalsePositive	ABM54548	601	608	0.00354	-2.451	PQKQSTAQ
FalsePositive	ACF21979	623	630	0.00354	-2.451	AQDENLIE
FalsePositive	AUO29152	692	699	0.00354	-2.451	TSRQLPGT
FalsePositive	ARM53611	362	369	0.00356	-2.44855	CQVESILE
FalsePositive	AGV98962	1804	1811	0.00356	-2.44855	CVTQAALH
FalsePositive	AKL88020	233	240	0.00357	-2.44733	NDVQAAAH
FalsePositive	AIT57557	1623	1630	0.00357	-2.44733	IDAQALVD
FalsePositive	BAA00518	226	233	0.00359	-2.44491	SATQSDQT
FalsePositive	AHY19027	563	570	0.00359	-2.44491	ISQQSFLQ
FalsePositive	ABM54550	1527	1534	0.00359	-2.44491	TILQAISA
FalsePositive	AAX23606	1743	1750	0.00359	-2.44491	YFTQGQGE
FalsePositive	AAD46138	1757	1764	0.00359	-2.44491	QVFEGIKE
FalsePositive	ABM54544	569	576	0.00361	-2.44249	HISQGALI
FalsePositive	ABM54520	629	636	0.00361	-2.44249	ASGQAVPS
FalsePositive	ACK37370	702	709	0.00361	-2.44249	AESESVGH
FalsePositive	AJC11330	1528	1535	0.00361	-2.44249	APKQALKK
FalsePositive	AMB19798	1923	1930	0.00361	-2.44249	VWFQALEQ
FalsePositive	APT69840	386	393	0.00363	-2.44009	NNTENNIT
FalsePositive	AAQ02679	410	417	0.00363	-2.44009	VQLQASPS
FalsePositive	YP_009028564	1752	1759	0.00363	-2.44009	DIFEGVKE
FalsePositive	ACK37418	2059	2066	0.00363	-2.44009	IAEQGKTY
FalsePositive	ABL61316	574	581	0.00364	-2.4389	NTVESEIK
FalsePositive	AFS30772	643	650	0.00364	-2.4389	AEFQLNSG
FalsePositive	ACK37408	655	662	0.00364	-2.4389	HGEEGVYN
FalsePositive	APA32000	692	699	0.00364	-2.4389	CQEQGTQL
FalsePositive	APM86434	705	712	0.00364	-2.4389	AKPNGALV
FalsePositive	AFD32987	292	299	0.00366	-2.43652	GFLQGATP
FalsePositive	APT69828	329	336	0.00366	-2.43652	PERQATPQ
FalsePositive	AVI00674	613	620	0.00366	-2.43652	TIPESVIE
FalsePositive	ABM21503	859	866	0.00366	-2.43652	VSYRGPGV
FalsePositive	AUD09291	1271	1278	0.00366	-2.43652	AEKENTST
FalsePositive	ADW78250	1739	1746	0.00366	-2.43652	DVFEGIKE
FalsePositive	BAG82822	157	164	0.00368	-2.43415	ADKQKNGI
FalsePositive	ABM21517	396	403	0.00368	-2.43415	NAIQGKVN
FalsePositive	AAQ02679	604	611	0.00368	-2.43415	PSTESLPN
FalsePositive	ACK37368	835	842	0.00368	-2.43415	NYKQSPQN
FalsePositive	AFR67087	222	229	0.0037	-2.4318	NMFESQNS
FalsePositive	AKA64452	304	311	0.0037	-2.4318	TEFNGLRT
FalsePositive	ABO69379	387	394	0.0037	-2.4318	NNLQGSDE
FalsePositive	ACK37412	662	669	0.0037	-2.4318	ADGQNFSK
FalsePositive	BAW98046	1235	1242	0.0037	-2.4318	AEYEGSDV
FalsePositive	ACR14890	407	414	0.00371	-2.43063	AGVNGELI
FalsePositive	AUF49650	557	564	0.00371	-2.43063	ITQQAALQ
FalsePositive	AUF49663	569	576	0.00371	-2.43063	NDPEGALN
FalsePositive	ABO69379	593	600	0.00371	-2.43063	KHTQSVPT
FalsePositive	AIK66521	645	652	0.00371	-2.43063	IGSQADLS
FalsePositive	AFS30772	772	779	0.00371	-2.43063	ALEERDGT
FalsePositive	ACK37408	829	836	0.00371	-2.43063	VAYQSTYT
FalsePositive	YP_009028564	930	937	0.00371	-2.43063	VEVQANEY
FalsePositive	ACK37383	1215	1222	0.00371	-2.43063	IMIHGPPG
FalsePositive	ABF51202	13	20	0.00373	-2.42829	HTTQNAVS
FalsePositive	ACK37399	305	312	0.00373	-2.42829	TGTNGIPI
FalsePositive	ABF51180	486	493	0.00373	-2.42829	IGLQSTIV
FalsePositive	ACK37435	2079	2086	0.00373	-2.42829	TFPENEIF
FalsePositive	AHK24839	2082	2089	0.00373	-2.42829	NVYESIRW
FalsePositive	ABM54541	2107	2114	0.00373	-2.42829	ATFERVTW
FalsePositive	AJD14709	233	240	0.00375	-2.42597	GAVQNVVH
FalsePositive	CAA74807	362	369	0.00375	-2.42597	CQVESLLE
FalsePositive	AQM32742	1394	1401	0.00375	-2.42597	APRQALKK
FalsePositive	AOL02449	1215	1222	0.00377	-2.42366	ILFHGEPG
FalsePositive	APT69845	401	408	0.00379	-2.42136	PLMQNLQE
FalsePositive	ACK37428	557	564	0.00379	-2.42136	SISQSEAL
FalsePositive	APQ46501	644	651	0.00379	-2.42136	CIHESVLD
FalsePositive	ABF51191	1423	1430	0.00379	-2.42136	DLLQSVRT
FalsePositive	YP_009028564	1628	1635	0.00379	-2.42136	PKEESEIG
FalsePositive	ANN46839	1759	1766	0.00379	-2.42136	QVFEGLKE
FalsePositive	ABO69376	203	210	0.0038	-2.42022	SHTEGNVS
FalsePositive	ABF51186	229	236	0.0038	-2.42022	DRKQNNRQ
FalsePositive	AQM32742	257	264	0.0038	-2.42022	VSSQNKAD
FalsePositive	AFQ55937	919	926	0.0038	-2.42022	SGAQGTDT
FalsePositive	AKU75596	932	939	0.0038	-2.42022	ICFEGPRI
FalsePositive	AGA12643	1272	1279	0.0038	-2.42022	AERENTST
FalsePositive	ACK37412	1797	1804	0.0038	-2.42022	TLEESVYG
FalsePositive	AAQ02683	310	317	0.00382	-2.41794	DATQSVPI
FalsePositive	AFR11453	346	353	0.00382	-2.41794	DNFQSPSA
FalsePositive	AGW83677	581	588	0.00382	-2.41794	DVLEGAIE
FalsePositive	AGA12409	586	593	0.00382	-2.41794	GAVEGIIK
FalsePositive	AMN38450	600	607	0.00382	-2.41794	ASTNSLPD
FalsePositive	ACU00186	1115	1122	0.00382	-2.41794	PAVQNKKQ
FalsePositive	AQM32742	1625	1632	0.00382	-2.41794	DLFEGNKE
FalsePositive	AAL69631	1847	1854	0.00382	-2.41794	YVTQGIKK
FalsePositive	ACK37382	391	398	0.00384	-2.41567	NTMQNLRK
FalsePositive	ACK37386	402	409	0.00384	-2.41567	QNKQGEQV
FalsePositive	ABM21518	499	506	0.00384	-2.41567	IGLQSSVT
FalsePositive	ABU62848	877	884	0.00384	-2.41567	ADQPGPDT
FalsePositive	AFS30772	1147	1154	0.00384	-2.41567	AQQQLIVE
FalsePositive	AAL69631	1251	1258	0.00384	-2.41567	AIAESISG
FalsePositive	CAC95225	1504	1511	0.00384	-2.41567	SQVQAERN
FalsePositive	AAV27300	1942	1949	0.00384	-2.41567	VWFQALKQ
FalsePositive	AGA12524	586	593	0.00386	-2.41341	GVVEGITK
FalsePositive	ABM54517	675	682	0.00386	-2.41341	NATQGTEK
FalsePositive	ABF51202	839	846	0.00386	-2.41341	VPQEGDVE
FalsePositive	ABK88241	939	946	0.00386	-2.41341	PGIQWIGE
FalsePositive	ACK37379	1417	1424	0.00386	-2.41341	ITIEGPPP
FalsePositive	AFV92902	185	192	0.00388	-2.41117	KFHQGALV
FalsePositive	ADK22846	185	192	0.00388	-2.41117	KFHQGALF
FalsePositive	APT69835	204	211	0.00388	-2.41117	IGSENVSV
FalsePositive	CAP04369	586	593	0.00388	-2.41117	GTVEGITK
FalsePositive	ACK37426	697	704	0.00388	-2.41117	AAIEGDLG
FalsePositive	ACK37408	884	891	0.00388	-2.41117	CDHENLND
FalsePositive	AFQ55938	1966	1973	0.00388	-2.41117	VMLNGELF
FalsePositive	AGW83680	2106	2113	0.00388	-2.41117	ATFEKVTW
FalsePositive	AAX47038	227	234	0.0039	-2.40894	GNHQGTTT
FalsePositive	AAQ73088	319	326	0.0039	-2.40894	AEYNGLRV
FalsePositive	ACK37407	486	493	0.0039	-2.40894	VGLQSTVV
FalsePositive	ASZ70601	703	710	0.0039	-2.40894	PKNQNDKR
FalsePositive	ACR14890	882	889	0.0039	-2.40894	ADHPGDDV
FalsePositive	ADK22846	1681	1688	0.0039	-2.40894	VAEQGMLN
FalsePositive	ADO24588	197	204	0.00392	-2.40671	PEHQLASV
FalsePositive	AAS86318	214	221	0.00392	-2.40671	PGENGAEF
FalsePositive	AAR38847	395	402	0.00392	-2.40671	VSAQNKAD
FalsePositive	ABO69377	702	709	0.00392	-2.40671	SQPQAARF
FalsePositive	ANJ61742	853	860	0.00392	-2.40671	TMPHNIIT
FalsePositive	AAF21971	1755	1762	0.00392	-2.40671	QIFEGNKE
FalsePositive	CAE12182	210	217	0.00394	-2.4045	VNEHGISE
FalsePositive	ACK37420	404	411	0.00394	-2.4045	VNKQNEQI
FalsePositive	ARB07836	851	858	0.00394	-2.4045	TIEQSEHR
FalsePositive	YP_001715611	1153	1160	0.00394	-2.4045	PLLESQIT
FalsePositive	AJK93553	1611	1618	0.00394	-2.4045	VDDQGVNL
FalsePositive	ARR74572	1637	1644	0.00394	-2.4045	AREEAEVS
FalsePositive	ACR14890	300	307	0.00395	-2.4034	GSTQAPQT
FalsePositive	NP_758520	402	409	0.00395	-2.4034	SFTEGEIM
FalsePositive	ABF51186	589	596	0.00395	-2.4034	NINESNPT
FalsePositive	ACK37430	993	1000	0.00395	-2.4034	DMFEAEYQ
FalsePositive	ANP43767	233	240	0.00397	-2.40121	GAVQNAVY
FalsePositive	ARC95292	402	409	0.00397	-2.40121	SFVEGEIM
FalsePositive	ACS34684	582	589	0.00397	-2.40121	DMIEGAVE
FalsePositive	CAA24446	981	988	0.00397	-2.40121	HGFESPGD
FalsePositive	ACK37375	1702	1709	0.00397	-2.40121	TKTENVRE
FalsePositive	ABF51201	1712	1719	0.00397	-2.40121	VKEHNLYS
FalsePositive	AFR79234	1753	1760	0.00397	-2.40121	HIFEGDKE
FalsePositive	ADO85560	1763	1770	0.00397	-2.40121	DVFEGNKD
FalsePositive	ACK37403	1802	1809	0.00397	-2.40121	SMEESVYG
FalsePositive	YP_003358790	647	654	0.00399	-2.39903	VKLEGLQS
FalsePositive	AGW83677	798	805	0.00399	-2.39903	STSEGDSL
FalsePositive	AAP37263	923	930	0.00399	-2.39903	SKAQGTDT
FalsePositive	YP_009020973	1563	1570	0.00399	-2.39903	AMAHGEVA
FalsePositive	ACJ04794	1760	1767	0.00399	-2.39903	DIFEGNKE
FalsePositive	AAQ73091	217	224	0.00401	-2.39686	NGEQASEF
FalsePositive	YP_003358790	612	619	0.00401	-2.39686	ATPEGMIE
FalsePositive	AHK24839	1784	1791	0.00401	-2.39686	TINQAIYG
FalsePositive	BAW98045	374	381	0.00403	-2.39469	ADAEGVAR
FalsePositive	ABM54522	414	421	0.00403	-2.39469	ADTNNPIL
FalsePositive	AAQ02677	636	643	0.00403	-2.39469	PLEPGDTV
FalsePositive	ABM54521	927	934	0.00403	-2.39469	SKAQGTDQ
FalsePositive	ACU00185	1152	1159	0.00405	-2.39254	AQQQLLVE
FalsePositive	BAA00518	1771	1778	0.00405	-2.39254	QVFEGVKE
FalsePositive	AEL31290	2052	2059	0.00405	-2.39254	STFQKIDW
FalsePositive	AEL31289	158	165	0.00407	-2.39041	IFGQNLYF
FalsePositive	AFV92903	418	425	0.00407	-2.39041	NKEQSIFS
FalsePositive	AMN38450	582	589	0.00407	-2.39041	DVIEGAID
FalsePositive	AIB00633	586	593	0.00407	-2.39041	KVAQGALT
FalsePositive	AMB19800	2041	2048	0.00407	-2.39041	NKTENFED
FalsePositive	AAF81252	573	580	0.00409	-2.38828	GVTEGIIA
FalsePositive	APS85799	595	602	0.00409	-2.38828	ASTHSLGT
FalsePositive	AGV98962	705	712	0.00409	-2.38828	AKPNGVLV
FalsePositive	ADO24588	1173	1180	0.00409	-2.38828	VLFNNILW
FalsePositive	AKQ44189	621	628	0.00411	-2.38616	TVVENFIS
FalsePositive	AAK13071	644	651	0.00411	-2.38616	YNTQGEDQ
FalsePositive	ACT89356	13	20	0.00413	-2.38405	HSTQNAVS
FalsePositive	AAQ02682	232	239	0.00413	-2.38405	ATTQSTRK
FalsePositive	AAY59418	316	323	0.00413	-2.38405	GFRQAVTQ
FalsePositive	APT69843	402	409	0.00413	-2.38405	QSRQGQQV
FalsePositive	APT69821	404	411	0.00413	-2.38405	VPRQAADT
FalsePositive	AHX57702	584	591	0.00413	-2.38405	ALTHALPT
FalsePositive	ABM54538	791	798	0.00413	-2.38405	VPLEGENT
FalsePositive	ABO69374	878	885	0.00413	-2.38405	CTNENLSD
FalsePositive	AAR38840	1103	1110	0.00413	-2.38405	PMAQKQSD
FalsePositive	ANQ44601	1272	1279	0.00413	-2.38405	AEKENTSV
FalsePositive	CAA74807	1739	1746	0.00413	-2.38405	DVFEGVKE
FalsePositive	AGU38786	2124	2131	0.00413	-2.38405	GIHESIRW
FalsePositive	CAE12178	210	217	0.00415	-2.38195	VNEHGLSE
FalsePositive	YP_001715611	630	637	0.00415	-2.38195	TTVQAFYA
FalsePositive	ACK37372	1217	1224	0.00415	-2.38195	VMIHGLPG
FalsePositive	YP_009243645	199	206	0.00417	-2.37986	HKIQSATT
FalsePositive	NP_040760	407	414	0.00417	-2.37986	IQLEGPLR
FalsePositive	YP_009028564	522	529	0.00417	-2.37986	VVPPGAPT
FalsePositive	AUF49662	557	564	0.00417	-2.37986	ITQQAVLQ
FalsePositive	ACK37431	2061	2068	0.00417	-2.37986	CFKQLDYD
FalsePositive	YP_009028564	177	184	0.00419	-2.37779	IHVQANAS
FalsePositive	ABF51206	400	407	0.00419	-2.37779	IKLQSSVD
FalsePositive	AIN45139	531	538	0.00419	-2.37779	VVTQSTIL
FalsePositive	ABF51198	655	662	0.00419	-2.37779	DTNEGDYD
FalsePositive	ANN02908	60	67	0.00421	-2.37572	VIKEGAVP
FalsePositive	AAL37156	204	211	0.00421	-2.37572	TNAENAPT
FalsePositive	AAA50478	557	564	0.00421	-2.37572	DIEQSANI
FalsePositive	ABV25903	558	565	0.00421	-2.37572	QISQAAIF
FalsePositive	AAX47038	652	659	0.00421	-2.37572	GAQEGDTD
FalsePositive	AJO54282	759	766	0.00421	-2.37572	TSTENEYG
FalsePositive	ANQ44600	853	860	0.00421	-2.37572	VLYRGEGV
FalsePositive	AAQ73077	204	211	0.00423	-2.37366	ADPEGTVT
FalsePositive	AKA64452	1096	1103	0.00423	-2.37366	NAFRGLDW
FalsePositive	AKH49408	1214	1221	0.00423	-2.37366	IVVHGPPG
FalsePositive	AAF05693	1336	1343	0.00423	-2.37366	IEVQKDYK
FalsePositive	AFO12670	1459	1466	0.00423	-2.37366	SLEEGPAP
FalsePositive	YP_003358790	577	584	0.00425	-2.37161	TTIQNLTP
FalsePositive	ABO69376	657	664	0.00425	-2.37161	PRKEGDRM
FalsePositive	ABF51182	203	210	0.00427	-2.36957	SRTEGNVS
FalsePositive	YP_009020973	362	369	0.00427	-2.36957	IQVESLVE
FalsePositive	ARC95293	578	585	0.00427	-2.36957	ASSHNIST
FalsePositive	AFQ55938	1196	1203	0.00427	-2.36957	VLFNNIRW
FalsePositive	ACK37437	698	705	0.00429	-2.36754	ISSQSANI
FalsePositive	ABV25904	1105	1112	0.00429	-2.36754	PIVQKQSD
FalsePositive	ABM54541	1272	1279	0.00429	-2.36754	AERENTSV
FalsePositive	AOV86534	1500	1507	0.00429	-2.36754	IALQAIAT
FalsePositive	AVK78347	1735	1742	0.00429	-2.36754	ALSNGDPR
FalsePositive	AVM86035	84	91	0.00431	-2.36552	SLTHGNST
FalsePositive	ANN02908	317	324	0.00431	-2.36552	PTVPGPGS
FalsePositive	ACK37410	349	356	0.00431	-2.36552	DDLQSPSA
FalsePositive	APR72754	560	567	0.00431	-2.36552	IKQENFYQ
FalsePositive	ACK37440	907	914	0.00431	-2.36552	TNTEGNDV
FalsePositive	AKA64451	1078	1085	0.00431	-2.36552	NMAQKQSE
FalsePositive	ATG80398	1152	1159	0.00431	-2.36552	PLLEGQIA
FalsePositive	AFV83532	5	12	0.00433	-2.36351	VSTQKAGS
FalsePositive	ACD78143	51	58	0.00433	-2.36351	SKFPGPIK
FalsePositive	ALB72987	707	714	0.00433	-2.36351	PTGEGVPQ
FalsePositive	ABV00571	586	593	0.00435	-2.36151	GVVEGVTK
FalsePositive	APW91090	1531	1538	0.00435	-2.36151	TLTQAKVQ
FalsePositive	CAA56365	369	376	0.00437	-2.35952	GEVQNLME
FalsePositive	ABB45874	386	393	0.00437	-2.35952	NNTEGNVN
FalsePositive	NP_653149	598	605	0.00437	-2.35952	ATSQASVE
FalsePositive	ACM62756	1763	1770	0.00437	-2.35952	DIFEGNRE
FalsePositive	YP_009246449	1843	1850	0.00437	-2.35952	TMEEALYG
FalsePositive	ABM21504	498	505	0.00439	-2.35754	IGLQSSAT
FalsePositive	AEL31292	591	598	0.00439	-2.35754	TKPQALGA
FalsePositive	ALU66466	1167	1174	0.00439	-2.35754	TLLENQIS
FalsePositive	AAQ73095	233	240	0.00441	-2.35556	NDVQRAVF
FalsePositive	ADW78250	777	784	0.00443	-2.3536	AITQLQAT
FalsePositive	APZ85755	797	804	0.00443	-2.3536	GATQRPIV
FalsePositive	ANP43755	1032	1039	0.00443	-2.3536	VLKESLIG
FalsePositive	AOG61490	1158	1165	0.00443	-2.3536	PLLESQIF
FalsePositive	AAQ73092	1164	1171	0.00443	-2.3536	PLLESQIV
FalsePositive	ANJ61547	1922	1929	0.00443	-2.3536	ATFHNNPG
FalsePositive	ABF51191	400	407	0.00445	-2.35164	IELQSSTE
FalsePositive	AMD82094	557	564	0.00445	-2.35164	DAIQNAVT
FalsePositive	AGA12524	582	589	0.00445	-2.35164	DMIEGVVE
FalsePositive	AAW72811	599	606	0.00445	-2.35164	PKPQKQPT
FalsePositive	APT69825	685	692	0.00445	-2.35164	TNNQGLMQ
FalsePositive	AFV92902	1198	1205	0.00445	-2.35164	VIFNNIRW
FalsePositive	AAC00531	1752	1759	0.00445	-2.35164	QVFEGNKE
FalsePositive	AKA64452	318	325	0.00447	-2.34969	PTKPGPGS
FalsePositive	CAA24446	905	912	0.00447	-2.34969	DDLQNAVN
FalsePositive	YP_009259673	1159	1166	0.00447	-2.34969	PLLENQIS
FalsePositive	ABO76708	1725	1732	0.00447	-2.34969	VLTQRDPR
FalsePositive	AUF49676	2154	2161	0.00447	-2.34969	AWHNGEYE
FalsePositive	APW91090	214	221	0.00449	-2.34775	ALSEGEQA
FalsePositive	ACK37445	526	533	0.00449	-2.34775	IAPQNTPQ
FalsePositive	YP_009020973	622	629	0.00449	-2.34775	TSLEGFYG
FalsePositive	BAA00516	745	752	0.00449	-2.34775	PGKRNDYT
FalsePositive	ABV25903	1030	1037	0.00449	-2.34775	REVQNIKD
FalsePositive	AFK79845	1436	1443	0.00449	-2.34775	SLKQNKLE
FalsePositive	ARM53611	1463	1470	0.00449	-2.34775	IKEQSVQG
FalsePositive	AAD22045	1995	2002	0.00449	-2.34775	CLIEGINH
FalsePositive	ACK37375	723	730	0.00451	-2.34582	PKTRNDYT
FalsePositive	ACK37412	881	888	0.00451	-2.34582	CEPENLDD
FalsePositive	ANV28251	1272	1279	0.00451	-2.34582	AEKESTST
FalsePositive	NP_045756	1337	1344	0.00451	-2.34582	IEVQKEYK
FalsePositive	ALX38426	1755	1762	0.00451	-2.34582	HVFEGDKE
FalsePositive	AMB19798	1927	1934	0.00451	-2.34582	ALEQLLNN
FalsePositive	ACK37410	1943	1950	0.00451	-2.34582	VWFQALKE
FalsePositive	ATG80398	233	240	0.00453	-2.3439	HSVQAAVW
FalsePositive	ARB07388	387	394	0.00453	-2.3439	NTEENVNS
FalsePositive	APT69827	464	471	0.00453	-2.3439	PGAPGPTT
FalsePositive	AIA21703	602	609	0.00453	-2.3439	ASDEGLLE
FalsePositive	ASU43933	692	699	0.00453	-2.3439	TSTQGTSP
FalsePositive	AAF21971	693	700	0.00453	-2.3439	SQEQSTIK
FalsePositive	ACK37390	1207	1214	0.00453	-2.3439	VVIHGPPG
FalsePositive	ARC95293	1460	1467	0.00453	-2.3439	TSEQSVQG
FalsePositive	ARR74572	1539	1546	0.00453	-2.3439	TLKQAKVQ
FalsePositive	YP_009259673	1757	1764	0.00453	-2.3439	DVFEGNKE
FalsePositive	YP_009020973	1143	1150	0.00455	-2.34199	TLEHSNPT
FalsePositive	AFP66570	1763	1770	0.00455	-2.34199	DTFEGNKE
FalsePositive	ASW23000	5	12	0.00458	-2.33913	VTKQKVGS
FalsePositive	AAF12719	229	236	0.00458	-2.33913	ANGQNQVQ
FalsePositive	AAX47037	345	352	0.00458	-2.33913	DDYQSPSA
FalsePositive	ARU09500	623	630	0.00458	-2.33913	ATDENLIE
FalsePositive	AVK51671	697	704	0.00458	-2.33913	NRFQAMYV
FalsePositive	ABF51202	881	888	0.00458	-2.33913	CEPENLND
FalsePositive	QEG13945	936	943	0.00458	-2.33913	PGIQWIEQ
FalsePositive	ABU41835	1182	1189	0.00458	-2.33913	SMLENQIS
FalsePositive	ADU34211	1228	1235	0.00458	-2.33913	AEYENSGV
FalsePositive	YP_009020973	1258	1265	0.00458	-2.33913	DLLQNPDG
FalsePositive	AAQ02675	1288	1295	0.00458	-2.33913	YKQQGVVI
FalsePositive	AJO54283	1712	1719	0.00458	-2.33913	NIFPGEKE
FalsePositive	AMB19799	888	895	0.0046	-2.33724	CATEGPDR
FalsePositive	ACK37380	1172	1179	0.0046	-2.33724	VLFNNVLW
FalsePositive	ABM54519	1552	1559	0.0046	-2.33724	ARKPNVPT
FalsePositive	ADU34211	1569	1576	0.0046	-2.33724	IQVEGKTV
FalsePositive	ARD27152	1611	1618	0.0046	-2.33724	VDGQGVNL
FalsePositive	AKL88020	1629	1636	0.0046	-2.33724	AREEAEVN
FalsePositive	ABF51190	2080	2087	0.0046	-2.33724	TFPESEIF
FalsePositive	ACK37399	13	20	0.00462	-2.33536	HSTQNVVS
FalsePositive	AIK66521	209	216	0.00462	-2.33536	TVNEGALS
FalsePositive	ABV00575	1272	1279	0.00462	-2.33536	ADKENTST
FalsePositive	ANJ61553	56	63	0.00464	-2.33348	PVVEGLKA
FalsePositive	ABF51206	486	493	0.00464	-2.33348	IGLQSTIS
FalsePositive	CAJ01904	582	589	0.00464	-2.33348	DVIEGAIE
FalsePositive	ACK37377	661	668	0.00464	-2.33348	TGENNIST
FalsePositive	ABV25904	943	950	0.00464	-2.33348	VHVQANEY
FalsePositive	AMB19798	1721	1728	0.00464	-2.33348	VLTQKDPR
FalsePositive	ANJ61548	1949	1956	0.00464	-2.33348	ILLNGEIF
FalsePositive	ALB73003	214	221	0.00466	-2.33161	NLTNGEDT
FalsePositive	AAQ02683	852	859	0.00466	-2.33161	VPYQNSSV
FalsePositive	AFS30772	1115	1122	0.00466	-2.33161	PAVQSKKT
FalsePositive	AGA18495	414	421	0.00468	-2.32975	HGQQNNKQ
FalsePositive	AGC03215	584	591	0.00468	-2.32975	TISRGPSN
FalsePositive	ACK37394	726	733	0.00468	-2.32975	PEKRNDYT
FalsePositive	AMB19799	1159	1166	0.00468	-2.32975	AQQQLILE
FalsePositive	ACK37430	1173	1180	0.00468	-2.32975	TLFNNILW
FalsePositive	AUN27640	2180	2187	0.00468	-2.32975	PNFENLRT
FalsePositive	ABF51204	388	395	0.0047	-2.3279	NTSENLKT
FalsePositive	YP_009028564	582	589	0.0047	-2.3279	ASSHNIGT
FalsePositive	AHE93351	585	592	0.0047	-2.3279	TIQRGPSN
FalsePositive	ACK37429	726	733	0.0047	-2.3279	PKKRNDYT
FalsePositive	APT69823	1118	1125	0.0047	-2.3279	PAVQSKKQ
FalsePositive	CRL46950	1530	1537	0.0047	-2.3279	TLRQAKVQ
FalsePositive	ACK37410	1740	1747	0.0047	-2.3279	VLSENDPR
FalsePositive	AAQ73079	214	221	0.00473	-2.32514	NLTNGENT
FalsePositive	AAX47044	233	240	0.00473	-2.32514	GKVQNQVC
FalsePositive	AAQ73088	209	216	0.00475	-2.32331	VVNQAALS
FalsePositive	ACK37429	598	605	0.00475	-2.32331	ATSNSAPT
FalsePositive	ABM21507	611	618	0.00475	-2.32331	NTNQSTPE
FalsePositive	CAA63480	696	703	0.00475	-2.32331	YQHQGSIN
FalsePositive	AUF49629	937	944	0.00475	-2.32331	VEVQASEF
FalsePositive	ALB72999	160	167	0.00477	-2.32148	VCAQNAQF
FalsePositive	AJB44634	214	221	0.00477	-2.32148	PGENGADF
FalsePositive	ALB72948	242	249	0.00477	-2.32148	PLSQAAVY
FalsePositive	AFO83469	347	354	0.00477	-2.32148	DEYQSPTA
FalsePositive	ACF21979	557	564	0.00477	-2.32148	DVEQSANI
FalsePositive	ANZ02994	587	594	0.00477	-2.32148	GPHQGSAV
FalsePositive	AUF49631	851	858	0.00477	-2.32148	TIVQSEHR
FalsePositive	AMB19798	321	328	0.00479	-2.31966	GARQAIKQ
FalsePositive	ADU34211	403	410	0.00479	-2.31966	PGINGPLQ
FalsePositive	ALB72947	606	613	0.00479	-2.31966	PPLQAAET
FalsePositive	AUF49626	649	656	0.00479	-2.31966	TKENGNIK
FalsePositive	ABF51200	884	891	0.00479	-2.31966	CESENLND
FalsePositive	AVE14262	1199	1206	0.00479	-2.31966	VLFNNVRW
FalsePositive	ACK37423	1260	1267	0.00479	-2.31966	DIMQNPSG
FalsePositive	AFQ55937	325	332	0.00481	-2.31785	CEFNGLRS
FalsePositive	APR72754	584	591	0.00481	-2.31785	TIARGPSN
FalsePositive	AAQ02675	1267	1274	0.00481	-2.31785	IAKQANTS
FalsePositive	ALB72926	1992	1999	0.00481	-2.31785	TLIEGINH
FalsePositive	AIE89768	1993	2000	0.00481	-2.31785	SLVEGINH
FalsePositive	ABF51195	36	43	0.00484	-2.31515	AASHGASK
FalsePositive	AAR38848	397	404	0.00484	-2.31515	AQTEADKL
FalsePositive	APT69841	487	494	0.00484	-2.31515	VGLQSTVS
FalsePositive	AMD82547	705	712	0.00484	-2.31515	NLENGLTN
FalsePositive	ABM54529	792	799	0.00484	-2.31515	VPIEGETS
FalsePositive	ACK37430	2059	2066	0.00484	-2.31515	IARQGSTY
FalsePositive	BAW98047	199	206	0.00486	-2.31336	HKIQSAET
FalsePositive	ALB72924	1285	1292	0.00486	-2.31336	DLYQNPDG
FalsePositive	ACK37409	1751	1758	0.00486	-2.31336	NVFPGDKE
FalsePositive	ABM54536	112	119	0.00488	-2.31158	NDTEANPV
FalsePositive	AFO42818	233	240	0.00488	-2.31158	TAVQANVI
FalsePositive	ABU62849	885	892	0.00488	-2.31158	AEHPGDDI
FalsePositive	ADK22846	1198	1205	0.00488	-2.31158	TLFNNIRW
FalsePositive	ABF51198	390	397	0.0049	-2.3098	NNTEGNVK
FalsePositive	ACK37416	833	840	0.0049	-2.3098	KPSQGDYS
FalsePositive	AEC47479	1160	1167	0.0049	-2.3098	NMKQLPLL
FalsePositive	YP_003358790	1526	1533	0.0049	-2.3098	TIRQAKVQ
FalsePositive	AUO29156	233	240	0.00492	-2.30803	NDVQRVVF
FalsePositive	APT69829	659	666	0.00492	-2.30803	YNEQGNNF
FalsePositive	ANN02908	766	773	0.00492	-2.30803	VFSENDVV
FalsePositive	AKR53677	18	25	0.00495	-2.30539	AATEGSTI
FalsePositive	ABU41835	569	576	0.00495	-2.30539	HISQSAII
FalsePositive	AFR46521	600	607	0.00495	-2.30539	PTVQNTAS
FalsePositive	ACK37398	903	910	0.00495	-2.30539	TNTEGDDI
FalsePositive	AHK24838	1144	1151	0.00495	-2.30539	ATQESQEE
FalsePositive	ABU62849	1148	1155	0.00495	-2.30539	AFPQSSEI
FalsePositive	ARC95293	1479	1486	0.00495	-2.30539	PTPQRVKW
FalsePositive	ABK20866	1778	1785	0.00495	-2.30539	HIFEGVKE
FalsePositive	APT69826	195	202	0.00497	-2.30364	PEHQLAYI
FalsePositive	ABM54529	133	140	0.00499	-2.3019	YTLQSVEW
FalsePositive	ARR29296	242	249	0.00499	-2.3019	PLSQALVY
FalsePositive	ACK37420	899	906	0.00499	-2.3019	TGAHGAET
FalsePositive	AFR46521	1269	1276	0.00499	-2.3019	IARQANTS
FalsePositive	ACK37370	1562	1569	0.00499	-2.3019	VQINGIVT
FalsePositive	AJF23329	1765	1772	0.00499	-2.3019	HVFEGIKE
FalsePositive	ACK37392	324	331	0.00502	-2.2993	ARNQSTKQ
FalsePositive	APT69841	347	354	0.00502	-2.2993	DDAQSPSA
FalsePositive	AIZ97150	591	598	0.00502	-2.2993	ANTESVPA
FalsePositive	YP_009243645	1598	1605	0.00502	-2.2993	KLKQNEKF
FalsePositive	ABM54549	1785	1792	0.00502	-2.2993	HVFEGAKE
FalsePositive	BAG82822	32	39	0.00504	-2.29757	VSGEGEGD
FalsePositive	ABO76708	226	233	0.00504	-2.29757	NSERGDNQ
FalsePositive	BAG70421	227	234	0.00504	-2.29757	NKEEGTSK
FalsePositive	BAO37615	619	626	0.00504	-2.29757	ASDENLIE
FalsePositive	NP_653149	759	766	0.00504	-2.29757	INGQGNGS
FalsePositive	AIY58060	387	394	0.00506	-2.29585	NTKENINS
FalsePositive	ACV51798	644	651	0.00506	-2.29585	KLKQGFKS
FalsePositive	AOP13014	1165	1172	0.00506	-2.29585	PLSENQIS
FalsePositive	AAQ02684	1272	1279	0.00506	-2.29585	AEKESTSV
FalsePositive	AOS88562	2120	2127	0.00506	-2.29585	PDEQSPFL
FalsePositive	AER29982	112	119	0.00508	-2.29414	NDKEANPV
FalsePositive	ABV25904	316	323	0.00508	-2.29414	AGLRNAVT
FalsePositive	YP_003358790	415	422	0.00508	-2.29414	GVFQSTYL
FalsePositive	AVI05001	569	576	0.00508	-2.29414	NDPESAIN
FalsePositive	CAJ01902	674	681	0.00508	-2.29414	APTQRASK
FalsePositive	NP_653149	336	343	0.00511	-2.29158	DNFQSPNL
FalsePositive	ABU62850	386	393	0.00511	-2.29158	NVNQSQAI
FalsePositive	AVI00675	388	395	0.00511	-2.29158	PTEEGKVS
FalsePositive	AGA18496	414	421	0.00511	-2.29158	HGQQNNRQ
FalsePositive	AKE33316	416	423	0.00511	-2.29158	PLTPGASS
FalsePositive	AHG06624	490	497	0.00511	-2.29158	SHFRGVSV
FalsePositive	ABM54536	1292	1299	0.00511	-2.29158	YKQQGVVL
FalsePositive	AAR38841	2153	2160	0.00511	-2.29158	GKEESEKF
FalsePositive	CAA24445	5	12	0.00513	-2.28988	QLFQSDNC
FalsePositive	ACK37413	197	204	0.00513	-2.28988	PEHQLATV
FalsePositive	AAQ73076	222	229	0.00513	-2.28988	STFQAQAN
FalsePositive	AKL71247	353	360	0.00513	-2.28988	AMPQFDPT
FalsePositive	CAA56365	406	413	0.00513	-2.28988	GNHQSDQV
FalsePositive	AMK37996	838	845	0.00513	-2.28988	KVREGEPT
FalsePositive	BAW35419	937	944	0.00513	-2.28988	PGIQWVEQ
FalsePositive	AFD53619	1045	1052	0.00513	-2.28988	IGSEGAVG
FalsePositive	ASW23000	1433	1440	0.00513	-2.28988	CEENGLIG
FalsePositive	AFQ55938	2177	2184	0.00513	-2.28988	AQIRSVPV
FalsePositive	ARR29300	571	578	0.00515	-2.28819	NAVENAVS
FalsePositive	YP_009246449	616	623	0.00515	-2.28819	NHSQRETT
FalsePositive	ABD97876	1234	1241	0.00515	-2.28819	SKLENIIN
FalsePositive	AFV92903	2166	2173	0.00515	-2.28819	AWHNGPVE
FalsePositive	YP_009246449	646	653	0.00518	-2.28567	AAANNDYT
FalsePositive	AAX47038	704	711	0.00518	-2.28567	VSNEAPIT
FalsePositive	ANC94866	1234	1241	0.00518	-2.28567	SKLENAIN
FalsePositive	ABM21508	1428	1435	0.00518	-2.28567	CTRQRFSV
FalsePositive	ABM21516	311	318	0.0052	-2.284	ASVELPIT
FalsePositive	ABV25903	1160	1167	0.0052	-2.284	PLLENQIN
FalsePositive	AAS86317	1598	1605	0.0052	-2.284	KLRQNEKF
FalsePositive	ACU00186	5	12	0.00522	-2.28233	VSRQKVGS
FalsePositive	APT69810	585	592	0.00522	-2.28233	NIKESQAT
FalsePositive	ACK37369	791	798	0.00522	-2.28233	TDKQKIKT
FalsePositive	AOP13014	1160	1167	0.00522	-2.28233	NLKQLPLS
FalsePositive	AFR11453	1634	1641	0.00522	-2.28233	AREEAEAN
FalsePositive	ABO69381	2148	2155	0.00522	-2.28233	KFVQGIRS
FalsePositive	AMD82094	371	378	0.00525	-2.27984	NNVQGTNN
FalsePositive	AUD08518	605	612	0.00525	-2.27984	ALPNNESS
FalsePositive	AFK79845	876	883	0.00525	-2.27984	ASEPGPDY
FalsePositive	ABF51184	1173	1180	0.00525	-2.27984	TLFNNVLW
FalsePositive	ABM54551	1279	1286	0.00525	-2.27984	AERESTSV
FalsePositive	ANV28245	1502	1509	0.00525	-2.27984	ITSQAQTE
FalsePositive	AAL69631	1607	1614	0.00525	-2.27984	VDPEGVNL
FalsePositive	ANV28263	1639	1646	0.00525	-2.27984	ALKRNEKF
FalsePositive	ACK37412	1897	1904	0.00525	-2.27984	KFHQNPGI
FalsePositive	AEL31291	11	18	0.00527	-2.27819	GSHENAIN
FalsePositive	AEO51785	112	119	0.00527	-2.27819	NDREANPV
FalsePositive	YP_009028564	314	321	0.00527	-2.27819	SGLRGAIT
FalsePositive	AMH87228	376	383	0.00527	-2.27819	AQVESFIP
FalsePositive	ABF51181	469	476	0.00527	-2.27819	PGAPGPET
FalsePositive	AHL77760	561	568	0.00527	-2.27819	IKQESFYQ
FalsePositive	APU57649	698	705	0.00527	-2.27819	IASQSENI
FalsePositive	AEX07779	823	830	0.00527	-2.27819	CQYQKAGN
FalsePositive	AFO42820	1123	1130	0.00527	-2.27819	VKIQKFID
FalsePositive	ACK37413	1260	1267	0.00527	-2.27819	DIMQNPGG
FalsePositive	AAW30685	223	230	0.0053	-2.27572	ATQPGPGG
FalsePositive	AOR57086	570	577	0.0053	-2.27572	DIIEGAVT
FalsePositive	ABF51202	727	734	0.0053	-2.27572	PTTRNDYT
FalsePositive	AHK24838	845	852	0.0053	-2.27572	HTEQAIYK
FalsePositive	NP_758520	1716	1723	0.0053	-2.27572	SKKHGFPV
FalsePositive	AFK79845	1735	1742	0.0053	-2.27572	NLKESVLS
FalsePositive	AEQ59478	1763	1770	0.0053	-2.27572	NVFEGTKE
FalsePositive	ACK37439	1896	1903	0.0053	-2.27572	AFHNNPGI
FalsePositive	ARK08560	1943	1950	0.0053	-2.27572	VWFQALKS
FalsePositive	ABF51205	594	601	0.00532	-2.27409	ATSNSAPV
FalsePositive	ABM54547	877	884	0.00532	-2.27409	TAVENINT
FalsePositive	ABM54521	1182	1189	0.00532	-2.27409	SMLENQIN
FalsePositive	APT69839	1950	1957	0.00532	-2.27409	SVLENLGF
FalsePositive	AAL69631	293	300	0.00534	-2.27246	ATTQVPIT
FalsePositive	ACK37375	648	655	0.00534	-2.27246	SELQLDYT
FalsePositive	AAD02132	693	700	0.00534	-2.27246	AQDQSTIS
FalsePositive	AEL31293	1212	1219	0.00534	-2.27246	CLIRGPPG
FalsePositive	AKE33312	1559	1566	0.00534	-2.27246	IMKRNAST
FalsePositive	ABF51205	386	393	0.00537	-2.27003	NNVEGNEK
FalsePositive	ABV25903	504	511	0.00537	-2.27003	TSTNGVYN
FalsePositive	ABO69374	590	597	0.00537	-2.27003	NIKESKPQ
FalsePositive	AMD82094	780	787	0.00537	-2.27003	PLPENETI
FalsePositive	YP_003358790	1157	1164	0.00537	-2.27003	TIEHSAPS
FalsePositive	ACU00186	1200	1207	0.00537	-2.27003	VLIHGDPG
FalsePositive	AIT57556	1275	1282	0.00537	-2.27003	ADRENTSV
FalsePositive	ACK37407	1588	1595	0.00537	-2.27003	VLVNGQPI
FalsePositive	ALB72944	45	52	0.00539	-2.26841	DFAQNPAK
FalsePositive	AKU75592	373	380	0.00539	-2.26841	NNTEGAVG
FalsePositive	AAW30685	374	381	0.00539	-2.26841	CRVESILE
FalsePositive	AAQ02681	853	860	0.00539	-2.26841	VAYNGPTV
FalsePositive	AFK79845	1215	1222	0.00539	-2.26841	VISRGLTT
FalsePositive	AAQ73083	1490	1497	0.00539	-2.26841	ICLQAITT
FalsePositive	AAX47044	229	236	0.00542	-2.266	TTGQGKVQ
FalsePositive	ACK37384	588	595	0.00542	-2.266	NIRESQAT
FalsePositive	YP_009020973	674	681	0.00542	-2.266	IVAQAVDE
FalsePositive	ABM54520	865	872	0.00542	-2.266	DLKQGSVL
FalsePositive	AJB44634	986	993	0.00542	-2.266	DYVQNLGN
FalsePositive	ACK37391	1260	1267	0.00542	-2.266	DVMQNPSG
FalsePositive	APR72754	1752	1759	0.00542	-2.266	HIFEGNKE
FalsePositive	QEG13939	1922	1929	0.00542	-2.266	ATFHSNPG
FalsePositive	AEO51779	112	119	0.00544	-2.2644	TDKEANPV
FalsePositive	ACR14890	388	395	0.00544	-2.2644	NIKQKLDV
FalsePositive	ACK37392	772	779	0.00544	-2.2644	DGYEGDSL
FalsePositive	APT69825	877	884	0.00544	-2.2644	CDRPGPDT
FalsePositive	AUF49672	951	958	0.00544	-2.2644	AEVQASEY
FalsePositive	BAA00518	214	221	0.00547	-2.26201	AMANGDKA
FalsePositive	ATG80398	214	221	0.00547	-2.26201	HLSQGERA
FalsePositive	AAQ73081	406	413	0.00547	-2.26201	GNHQSEQV
FalsePositive	ABM21516	604	611	0.00547	-2.26201	PSSESLPN
FalsePositive	AMB19798	772	779	0.00547	-2.26201	GTEESEIK
FalsePositive	ABM54541	1200	1207	0.00547	-2.26201	TLFNNVRW
FalsePositive	AAQ73080	385	392	0.00549	-2.26043	NTQENVRT
FalsePositive	ACK37412	488	495	0.00549	-2.26043	VGLQSTAS
FalsePositive	ACD78142	586	593	0.00549	-2.26043	GAVEGITK
FalsePositive	APW91136	826	833	0.00549	-2.26043	YEKQGSVD
FalsePositive	CRL46950	1762	1769	0.00549	-2.26043	VLKNGDPR
FalsePositive	ACK37441	1893	1900	0.00549	-2.26043	AFHRNPGI
FalsePositive	AAQ03192	2109	2116	0.00549	-2.26043	AAFEKVTW
FalsePositive	ACK37373	725	732	0.00551	-2.25885	PTKRNDYT
FalsePositive	AAQ02684	923	930	0.00551	-2.25885	SRAQGTDT
FalsePositive	ANV28253	1477	1484	0.00551	-2.25885	DLLQSVDS
FalsePositive	ACD78144	2102	2109	0.00551	-2.25885	PADQSATF
FalsePositive	ACK37375	228	235	0.00554	-2.25649	IGRENNGK
FalsePositive	AIE89767	633	640	0.00554	-2.25649	VNKHGVSE
FalsePositive	AUD09281	922	929	0.00554	-2.25649	SKAQGTDS
FalsePositive	AHK24839	1221	1228	0.00554	-2.25649	VIARGLTT
FalsePositive	ARR29294	208	215	0.00556	-2.25493	TKPNGPGL
FalsePositive	AAT79531	563	570	0.00556	-2.25493	ISQENFYQ
FalsePositive	AEO51783	931	938	0.00556	-2.25493	SRAQGTDQ
FalsePositive	AVJ35777	1000	1007	0.00556	-2.25493	SFGQGFTD
FalsePositive	AKA64451	1429	1436	0.00556	-2.25493	PPPQAIAD
FalsePositive	APT69811	2057	2064	0.00556	-2.25493	CFKQLDYS
FalsePositive	CAJ29002	2180	2187	0.00556	-2.25493	AKVRSVPI
FalsePositive	ABO69376	13	20	0.00559	-2.25259	HENQNILT
FalsePositive	AFY09605	222	229	0.00559	-2.25259	NLFESQNS
FalsePositive	ABK88241	306	313	0.00559	-2.25259	CEFNGLRN
FalsePositive	ACK37418	464	471	0.00559	-2.25259	PGAPGPKT
FalsePositive	AVK51671	584	591	0.00559	-2.25259	ASTHSIAT
FalsePositive	AAR38843	622	629	0.00559	-2.25259	ATDESLIE
FalsePositive	APT69841	651	658	0.00559	-2.25259	IVEHGEDV
FalsePositive	ACO89621	1165	1172	0.00559	-2.25259	PLLENQAT
FalsePositive	CAC07403	1777	1784	0.00559	-2.25259	HVFEGVKE
FalsePositive	ANV28232	2109	2116	0.00559	-2.25259	ATFELVTW
FalsePositive	CAJ01904	2180	2187	0.00559	-2.25259	AKIRSVPV
FalsePositive	AIB00401	212	219	0.00561	-2.25104	TSYQNANP
FalsePositive	ACK37370	298	305	0.00561	-2.25104	CPLQSSGT
FalsePositive	NP_040760	308	315	0.00561	-2.25104	AEYNGLRN
FalsePositive	AJC11330	371	378	0.00561	-2.25104	CQIESILE
FalsePositive	ABA43708	390	397	0.00561	-2.25104	ISPQSDMD
FalsePositive	AAL69631	492	499	0.00561	-2.25104	AHYRNASV
FalsePositive	ABM54548	599	606	0.00561	-2.25104	PKPQKQST
FalsePositive	AEA11174	66	73	0.00564	-2.24872	APLESPSA
FalsePositive	ARO77045	323	330	0.00564	-2.24872	IRSQAVRV
FalsePositive	ACK37431	577	584	0.00564	-2.24872	NYVEGVLN
FalsePositive	ALU66466	591	598	0.00564	-2.24872	PSTQSTAE
FalsePositive	ACO59914	729	736	0.00564	-2.24872	DSRESPAW
FalsePositive	YP_001715611	1599	1606	0.00564	-2.24872	VDAEGVNL
FalsePositive	APT69810	1938	1945	0.00564	-2.24872	IWFQALKQ
FalsePositive	CAH61520	387	394	0.00566	-2.24718	NTKENVNS
FalsePositive	ACK37428	400	407	0.00566	-2.24718	PLMQNQQE
FalsePositive	AGW83676	600	607	0.00566	-2.24718	GSTNGVPD
FalsePositive	AEO51785	611	618	0.00566	-2.24718	DTQQSAPA
FalsePositive	YP_009028564	1489	1496	0.00566	-2.24718	ICLQALTT
FalsePositive	AUD08533	406	413	0.00569	-2.24489	GNHQSAQV
FalsePositive	AVQ54963	584	591	0.00569	-2.24489	ALTQAMPA
FalsePositive	BAA24003	687	694	0.00569	-2.24489	STGQNVTT
FalsePositive	YP_007985635	987	994	0.00569	-2.24489	DNVQSLGN
FalsePositive	AEO51787	1182	1189	0.00569	-2.24489	GMLENQIN
FalsePositive	NP_040958	1762	1769	0.00569	-2.24489	VLRNGDPR
FalsePositive	AGA18494	213	220	0.00571	-2.24336	TYKQANPG
FalsePositive	ADO24588	484	491	0.00571	-2.24336	IGLQSTVV
FalsePositive	ABM54546	677	684	0.00571	-2.24336	ATTEADKK
FalsePositive	AGA37367	705	712	0.00571	-2.24336	AKPNGQLV
FalsePositive	AJO54283	1749	1756	0.00571	-2.24336	AMNENIHI
FalsePositive	AVQ54967	316	323	0.00574	-2.24109	GLRQAVQQ
FalsePositive	AER29982	414	421	0.00574	-2.24109	ASKPNASE
FalsePositive	AJE29752	610	617	0.00574	-2.24109	PALQAAEI
FalsePositive	AAR38848	633	640	0.00574	-2.24109	VNRHGVSE
FalsePositive	ADU20413	792	799	0.00574	-2.24109	VPLEGQAQ
FalsePositive	AEC47482	836	843	0.00574	-2.24109	YLFQANPN
FalsePositive	APT69821	1222	1229	0.00574	-2.24109	VIARGLTD
FalsePositive	AUD08521	1548	1555	0.00574	-2.24109	NKKPNIPT
FalsePositive	ABF51204	1740	1747	0.00574	-2.24109	VLSESDPR
FalsePositive	ABF51184	2059	2066	0.00574	-2.24109	IAKQGSKY
FalsePositive	ACZ28901	2179	2186	0.00574	-2.24109	AMIRSVPI
FalsePositive	ASU64357	529	536	0.00577	-2.23882	VVPPGAPS
FalsePositive	ACX85865	673	680	0.00577	-2.23882	PTTQAQKL
FalsePositive	AUD08524	1133	1140	0.00577	-2.23882	VKIQRFIE
FalsePositive	ACR14890	2083	2090	0.00577	-2.23882	DVFESIRW
FalsePositive	YP_009246449	470	477	0.00579	-2.23732	IGLQSTAT
FalsePositive	AAL69631	1424	1431	0.00579	-2.23732	HNTQNLVE
FalsePositive	AAW30684	60	67	0.00582	-2.23508	ALKEAAPP
FalsePositive	ABF51198	564	571	0.00582	-2.23508	HMQEGVLT
FalsePositive	AEO51782	610	617	0.00582	-2.23508	NTLQNTPA
FalsePositive	ACK37402	2059	2066	0.00582	-2.23508	TFTQLNYD
FalsePositive	ACK37420	486	493	0.00584	-2.23359	IGLQSTII
FalsePositive	ACK37369	932	939	0.00584	-2.23359	TIQESEYY
FalsePositive	ALB72929	228	235	0.00587	-2.23136	AELQYPYV
FalsePositive	AVK92956	228	235	0.00587	-2.23136	ARRENLER
FalsePositive	AOR57086	228	235	0.00587	-2.23136	AELQHPYV
FalsePositive	AAR38843	228	235	0.00587	-2.23136	AELQFPYV
FalsePositive	ABM54519	311	318	0.00587	-2.23136	ASTQIPIT
FalsePositive	CAE12177	586	593	0.00587	-2.23136	TISNGPTN
FalsePositive	AAR38841	597	604	0.00587	-2.23136	VSEHSIGT
FalsePositive	APT69822	1213	1220	0.00587	-2.23136	VIARGLSS
FalsePositive	NP_653149	18	25	0.00589	-2.22988	RAEQGANI
FalsePositive	ABM54550	1283	1290	0.00589	-2.22988	AKQENTSV
FalsePositive	ABV69564	386	393	0.00592	-2.22768	NNTEGNVM
FalsePositive	AFK79845	564	571	0.00592	-2.22768	NPVENFID
FalsePositive	AIM41612	867	874	0.00592	-2.22768	DFKQNSIT
FalsePositive	BAM44536	347	354	0.00595	-2.22548	DDYQSPTA
FalsePositive	AAL69631	366	373	0.00595	-2.22548	VQIEGIME
FalsePositive	ANV28269	1549	1556	0.00595	-2.22548	NKRPNIPT
FalsePositive	ABF51194	2059	2066	0.00595	-2.22548	TFKQLDYS
FalsePositive	AIT57557	326	333	0.00597	-2.22403	TEFNGLRN
FalsePositive	AVJ35777	516	523	0.00597	-2.22403	VIPPGFPQ
FalsePositive	ADR82078	582	589	0.00597	-2.22403	DLIEGAVE
FalsePositive	ALP31156	646	653	0.00597	-2.22403	SAVQADKN
FalsePositive	ANJ61547	852	859	0.00597	-2.22403	TMPHNIVT
FalsePositive	ABL61316	939	946	0.00597	-2.22403	PGIQWVEE
FalsePositive	YP_009020973	1076	1083	0.00597	-2.22403	NMAQKQAD
FalsePositive	ACI23463	1120	1127	0.00597	-2.22403	VKIQKFIE
FalsePositive	APT69841	1794	1801	0.00597	-2.22403	SLEESVYG
FalsePositive	AAQ73077	214	221	0.006	-2.22185	SLTEGERA
FalsePositive	ACT31465	224	231	0.006	-2.22185	GTFESQYN
FalsePositive	ACK37390	400	407	0.006	-2.22185	VILQSTIG
FalsePositive	ABM21504	605	612	0.006	-2.22185	NTVQNTQQ
FalsePositive	ANZ02994	1150	1157	0.006	-2.22185	PLLESQVT
FalsePositive	AQX83084	1532	1539	0.006	-2.22185	APKQALKR
FalsePositive	ABO69378	1722	1729	0.006	-2.22185	VSKQKVRD
FalsePositive	AFV92902	1777	1784	0.006	-2.22185	NVFPGVKE
FalsePositive	ABO69379	369	376	0.00603	-2.21968	GKVENLLE
FalsePositive	BAA18891	390	397	0.00603	-2.21968	ISAQSDMD
FalsePositive	AAR38844	595	602	0.00603	-2.21968	ASSHSLGT
FalsePositive	ALB73002	850	857	0.00603	-2.21968	KDRQNIKT
FalsePositive	AHK24839	1205	1212	0.00603	-2.21968	VLLHGNPG
FalsePositive	AAX47038	1497	1504	0.00603	-2.21968	ICLQAVTT
FalsePositive	ABM54536	1549	1556	0.00603	-2.21968	NKKPNLPT
FalsePositive	ACK37425	1727	1734	0.00603	-2.21968	VTRQKLRE
FalsePositive	APT69840	36	43	0.00605	-2.21824	AASNGASK
FalsePositive	ABM21517	185	192	0.00605	-2.21824	KFHQGALI
FalsePositive	AAS86318	371	378	0.00605	-2.21824	NNVEGQSG
FalsePositive	AAR38844	572	579	0.00605	-2.21824	AIENAVST
FalsePositive	ABK88241	574	581	0.00605	-2.21824	NTVESEIR
FalsePositive	NP_653149	602	609	0.00605	-2.21824	ASVESTIE
FalsePositive	APT68344	759	766	0.00605	-2.21824	TAYQWFYD
FalsePositive	ABM21517	852	859	0.00605	-2.21824	VPYQNSTV
FalsePositive	APT69836	1236	1243	0.00605	-2.21824	ITTESDIY
FalsePositive	AIA58176	2167	2174	0.00605	-2.21824	AWHNGEGE
FalsePositive	AUN27642	217	224	0.00608	-2.2161	GGEQAKTF
FalsePositive	YP_009344963	353	360	0.00608	-2.2161	AEVRNLLE
FalsePositive	ANZ02994	554	561	0.00608	-2.2161	QISQSAVL
FalsePositive	CAA28155	597	604	0.00608	-2.2161	PKPQSNLP
FalsePositive	ACK37391	793	800	0.00608	-2.2161	DEHQNKVE
FalsePositive	ASZ70601	1409	1416	0.00608	-2.2161	PETPGFIV
FalsePositive	ABU41836	133	140	0.00611	-2.21396	YTLQSVNW
FalsePositive	ABF51184	197	204	0.00611	-2.21396	PEHQLASI
FalsePositive	AGT57426	284	291	0.00611	-2.21396	AYAEGSTT
FalsePositive	AFK66746	831	838	0.00611	-2.21396	PNRESITT
FalsePositive	ACK37411	1726	1733	0.00611	-2.21396	TSRQKLKD
FalsePositive	ACI23463	1752	1759	0.00611	-2.21396	HVFEGNKE
FalsePositive	ALU66466	241	248	0.00613	-2.21254	PLSEALIF
FalsePositive	AGO01887	396	403	0.00613	-2.21254	VSVQSKTG
FalsePositive	AGA12357	586	593	0.00613	-2.21254	GAVEGVTK
FalsePositive	AJB44634	602	609	0.00613	-2.21254	ASDESLIE
FalsePositive	ACK37413	684	691	0.00613	-2.21254	TRFNSEIT
FalsePositive	AJO54281	1186	1193	0.00613	-2.21254	TGIQKELQ
FalsePositive	AAM09804	1551	1558	0.00613	-2.21254	TKKPNIPT
FalsePositive	AIY58060	225	232	0.00616	-2.21042	SRTESNGQ
FalsePositive	ACK37377	298	305	0.00616	-2.21042	CPLESDGQ
FalsePositive	AIA21703	374	381	0.00616	-2.21042	AGKNGIER
FalsePositive	ADD23216	407	414	0.00616	-2.21042	HSSEGAIF
FalsePositive	ABO69373	722	729	0.00616	-2.21042	PTKRNDYV
FalsePositive	ABM54549	1795	1802	0.00616	-2.21042	ALTRNDPR
FalsePositive	ACK37437	2057	2064	0.00616	-2.21042	TFRQLDYS
FalsePositive	YP_003358790	556	563	0.00619	-2.20831	DISQSAVL
FalsePositive	YP_009246449	855	862	0.00619	-2.20831	AFDEGPNL
FalsePositive	ACK37386	1026	1033	0.00619	-2.20831	TELQNMSL
FalsePositive	ADG57604	1988	1995	0.00619	-2.20831	GYSEGAIS
FalsePositive	AHK24839	11	18	0.00621	-2.20691	GTHENIVS
FalsePositive	ANV28250	582	589	0.00621	-2.20691	DIIEGAVE
FalsePositive	YP_001715611	622	629	0.00621	-2.20691	INTQRPTE
FalsePositive	ABM54529	822	829	0.00621	-2.20691	VNEHNPVQ
FalsePositive	AGW52035	1045	1052	0.00621	-2.20691	IGSESAVE
FalsePositive	AFK79845	1142	1149	0.00621	-2.20691	ATEEAQNE
FalsePositive	ABM21517	1198	1205	0.00621	-2.20691	ILFNNIRW
FalsePositive	ABF51191	1256	1263	0.00621	-2.20691	DIMQNPTG
FalsePositive	ACK37378	1560	1567	0.00621	-2.20691	IQVNGINT
FalsePositive	ACS88250	1944	1951	0.00621	-2.20691	AAFHNNPG
FalsePositive	APT69844	465	472	0.00624	-2.20482	PGAPGPTS
FalsePositive	AAO48740	696	703	0.00624	-2.20482	YQHQGTIN
FalsePositive	ACK37380	1581	1588	0.00624	-2.20482	VLINGFST
FalsePositive	ACK37420	1722	1729	0.00624	-2.20482	VSKQKVKE
FalsePositive	QEG13920	1923	1930	0.00624	-2.20482	TFHNNPGT
FalsePositive	ABM54529	232	239	0.00627	-2.20273	ASTQASRK
FalsePositive	AUF49622	306	313	0.00627	-2.20273	AYQNGATT
FalsePositive	ABO69379	405	412	0.00627	-2.20273	NKQNGQIF
FalsePositive	AAZ73343	490	497	0.00627	-2.20273	SHFRGVSS
FalsePositive	ARR29311	571	578	0.00627	-2.20273	NAVESAVS
FalsePositive	ACK37411	705	712	0.00627	-2.20273	ASQPNDSQ
FalsePositive	AAX47040	715	722	0.00627	-2.20273	PIPESVTS
FalsePositive	ARC95293	1231	1238	0.00627	-2.20273	AEYENSEV
FalsePositive	AUF49645	1757	1764	0.00627	-2.20273	QAFEGNKE
FalsePositive	AUF49670	230	237	0.0063	-2.20066	TVSEGSTD
FalsePositive	ACU00187	404	411	0.0063	-2.20066	IQLENQTE
FalsePositive	AEL31291	772	779	0.0063	-2.20066	ALEERDNT
FalsePositive	ACK37381	1211	1218	0.0063	-2.20066	VVIHGDPG
FalsePositive	AGA18493	2179	2186	0.0063	-2.20066	NQVRSVPV
FalsePositive	ARR29309	18	25	0.00632	-2.19928	VTTEGSTI
FalsePositive	YP_009243645	136	143	0.00632	-2.19928	PSLQWDTN
FalsePositive	AAA45762	185	192	0.00632	-2.19928	KFHQGLLI
FalsePositive	ACY40750	696	703	0.00632	-2.19928	STTQNQDA
FalsePositive	ACK37392	705	712	0.00632	-2.19928	IAGQGDDI
FalsePositive	AEE25814	2118	2125	0.00632	-2.19928	ATFQTVTW
FalsePositive	AMB57004	571	578	0.00635	-2.19723	GPVENAIT
FalsePositive	AWW21301	646	653	0.00635	-2.19723	SVAQADKN
FalsePositive	AVI04999	1132	1139	0.00635	-2.19723	NKIQKFIE
FalsePositive	ABV00556	1548	1555	0.00635	-2.19723	TKRPNIPT
FalsePositive	AIB00629	122	129	0.00638	-2.19518	PTEPGVAT
FalsePositive	CAD38168	234	241	0.00638	-2.19518	ASVQKAVC
FalsePositive	AUD08544	406	413	0.00638	-2.19518	GNRQSAQV
FalsePositive	ALP31173	646	653	0.00638	-2.19518	STAQADKN
FalsePositive	ACK37407	657	664	0.00638	-2.19518	SLEEGKNT
FalsePositive	ABO69377	846	853	0.00638	-2.19518	PKRNNIST
FalsePositive	BAM71655	1484	1491	0.00638	-2.19518	DLLQSVDN
FalsePositive	ACU00185	11	18	0.00641	-2.19314	GSHESAIN
FalsePositive	ABL61316	309	316	0.00641	-2.19314	NGLRNAIT
FalsePositive	AJR20996	413	420	0.00641	-2.19314	VGFQLQPG
FalsePositive	AHC94940	605	612	0.00641	-2.19314	PTAQSTPL
FalsePositive	AKU75645	621	628	0.00641	-2.19314	TLVENFLS
FalsePositive	APT69845	702	709	0.00641	-2.19314	SQPQAAQF
FalsePositive	AUD09228	1548	1555	0.00641	-2.19314	NKKPNVPT
FalsePositive	ACK37418	1582	1589	0.00641	-2.19314	VLVNGFKT
FalsePositive	AAX47044	354	361	0.00643	-2.19179	AMPQFDST
FalsePositive	AAR38841	395	402	0.00643	-2.19179	VSAQKDKD
FalsePositive	AEL31292	627	634	0.00643	-2.19179	ATVENFLG
FalsePositive	ASW23000	643	650	0.00643	-2.19179	AEFQLQNK
FalsePositive	AHK24839	996	1003	0.00643	-2.19179	AFGEGFTT
FalsePositive	AAX47040	1028	1035	0.00643	-2.19179	ILKESLIG
FalsePositive	AAQ02675	1050	1057	0.00643	-2.19179	SEIQNTVQ
FalsePositive	ABV25903	1101	1108	0.00643	-2.19179	PIAQKQSD
FalsePositive	ACK37391	2054	2061	0.00643	-2.19179	NFKQLDYN
FalsePositive	ABF51193	2055	2062	0.00643	-2.19179	CFKQLDYN
FalsePositive	AFC75700	2180	2187	0.00643	-2.19179	PNFENLRS
FalsePositive	BAO37619	208	215	0.00646	-2.18977	AKPNGQGL
FalsePositive	YP_003358790	380	387	0.00646	-2.18977	TATQASGV
FalsePositive	ABF51184	402	409	0.00646	-2.18977	QNRQGQQV
FalsePositive	ACK37428	404	411	0.00646	-2.18977	NQQESQVF
FalsePositive	AJO54282	1023	1030	0.00646	-2.18977	NLTQKVVK
FalsePositive	YP_009020973	1801	1808	0.00646	-2.18977	SMEEAIYG
FalsePositive	YP_001715611	1916	1923	0.00646	-2.18977	TFHRNPGT
FalsePositive	ABO69371	1940	1947	0.00646	-2.18977	VWFQALEK
FalsePositive	ABF51198	2126	2133	0.00646	-2.18977	HEYQSFVD
FalsePositive	AAT65964	185	192	0.00649	-2.18776	RFHQGALL
FalsePositive	ABF51180	593	600	0.00649	-2.18776	KHTQSVPI
FalsePositive	NP_758520	777	784	0.00649	-2.18776	AISQLQAT
FalsePositive	AEL31291	991	998	0.00649	-2.18776	AFGEGFTQ
FalsePositive	YP_003358790	1090	1097	0.00649	-2.18776	PMAQKQAD
FalsePositive	APT69810	1415	1422	0.00649	-2.18776	ISMEGPPP
FalsePositive	ALB72976	213	220	0.00652	-2.18575	APHPGFST
FalsePositive	ADU20413	582	589	0.00652	-2.18575	DAIEGAIE
FalsePositive	AIK66522	645	652	0.00652	-2.18575	IGSQADLG
FalsePositive	APT69827	721	728	0.00652	-2.18575	PGAPNPIQ
FalsePositive	NP_040760	943	950	0.00652	-2.18575	PGIQWINE
FalsePositive	AJF23329	214	221	0.00655	-2.18376	SLSEGETA
FalsePositive	AAF21971	222	229	0.00655	-2.18376	NVFESQNS
FalsePositive	AJC11328	383	390	0.00655	-2.18376	TGQEGINR
FalsePositive	AUD09270	571	578	0.00655	-2.18376	HIEQNALA
FalsePositive	AAR38841	633	640	0.00655	-2.18376	VNRNGVIE
FalsePositive	AUF49676	649	656	0.00655	-2.18376	TRENGNIK
FalsePositive	AKU75596	937	944	0.00655	-2.18376	PRIQWIEQ
FalsePositive	AJK93551	1160	1167	0.00655	-2.18376	NLKQLPLI
FalsePositive	ACK37426	1416	1423	0.00655	-2.18376	INMQSPPP
FalsePositive	AEQ59482	1532	1539	0.00655	-2.18376	VPKQALKK
FalsePositive	ACK37399	1731	1738	0.00655	-2.18376	NVFPGNKE
FalsePositive	ACK37391	1938	1945	0.00655	-2.18376	IWFQALKE
FalsePositive	AFV83532	210	217	0.00657	-2.18243	VTAENLTK
FalsePositive	AFY09605	416	423	0.00657	-2.18243	PLRPGPNS
FalsePositive	AUD09287	477	484	0.00657	-2.18243	PGAEAPTS
FalsePositive	AAQ02675	570	577	0.00657	-2.18243	HVIQNNAV
FalsePositive	ABM21503	605	612	0.00657	-2.18243	NSVQNTQQ
FalsePositive	AAC00531	647	654	0.00657	-2.18243	ATYNNNSE
FalsePositive	ACK37416	696	703	0.00657	-2.18243	IASQSNDI
FalsePositive	AAS86318	986	993	0.00657	-2.18243	DYVQSLGN
FalsePositive	ABM54550	1126	1133	0.00657	-2.18243	NMLELPYV
FalsePositive	ABF51206	1206	1213	0.00657	-2.18243	IVIHGPPG
FalsePositive	ABO69374	350	357	0.0066	-2.18046	DDNQSPSA
FalsePositive	ACK37377	387	394	0.0066	-2.18046	TETNGVTN
FalsePositive	AUD09267	586	593	0.0066	-2.18046	GAVEGIAK
FalsePositive	CAA59341	695	702	0.0066	-2.18046	YQRQGTSS
FalsePositive	AVQ54967	801	808	0.0066	-2.18046	IVGEGAPS
FalsePositive	AAQ73078	838	845	0.0066	-2.18046	TEERNDIN
FalsePositive	ACK37393	852	859	0.0066	-2.18046	AKREKITT
FalsePositive	AEL31293	1189	1196	0.0066	-2.18046	SMIQKELQ
FalsePositive	ABM21517	414	421	0.00663	-2.17849	ASENNANE
FalsePositive	ABV00569	582	589	0.00663	-2.17849	DLIEGVVE
FalsePositive	AIB00593	1548	1555	0.00663	-2.17849	NKRPNVPT
FalsePositive	ACK37418	1973	1980	0.00663	-2.17849	IGFESANL
FalsePositive	AEE01039	574	581	0.00666	-2.17653	SDTQSSSH
FalsePositive	AGV79289	592	599	0.00666	-2.17653	TVREAVGV
FalsePositive	APT69836	1558	1565	0.00666	-2.17653	AGTQVEID
FalsePositive	AMD82094	1717	1724	0.00666	-2.17653	SKKHNIPV
FalsePositive	AEJ54592	60	67	0.00669	-2.17457	ALREAVPP
FalsePositive	AKE33310	93	100	0.00669	-2.17457	TIQESANV
FalsePositive	ABM54528	112	119	0.00669	-2.17457	NAKEANPV
FalsePositive	AOF41448	123	130	0.00669	-2.17457	TQPEAATD
FalsePositive	ACU00185	628	635	0.00669	-2.17457	TNEEAEIE
FalsePositive	AAR38843	762	769	0.00669	-2.17457	STYQWFYD
FalsePositive	ACK37423	1210	1217	0.00669	-2.17457	VVIHGEPG
FalsePositive	AQM32742	47	54	0.00672	-2.17263	KFHQGALL
FalsePositive	AFO83469	234	241	0.00672	-2.17263	DVQQAVPN
FalsePositive	APT69821	630	637	0.00672	-2.17263	SKTNGEAT
FalsePositive	AIE89767	702	709	0.00672	-2.17263	TERNGNTS
FalsePositive	AMB19798	1139	1146	0.00672	-2.17263	ASEEAQDE
FalsePositive	AVW85864	11	18	0.00675	-2.1707	GTHENANV
FalsePositive	APX43287	317	324	0.00675	-2.1707	AEYNGLRL
FalsePositive	AFV83532	590	597	0.00675	-2.1707	SNSEGIPM
FalsePositive	ANJ61567	852	859	0.00675	-2.1707	TMPHNIAT
FalsePositive	BAD89965	1165	1172	0.00675	-2.1707	PLLENQVS
FalsePositive	AFK79845	1367	1374	0.00675	-2.1707	KRTQGSYS
FalsePositive	AJK93556	1483	1490	0.00675	-2.1707	IIPEAPIN
FalsePositive	BAA00168	1561	1568	0.00675	-2.1707	VQVNGIHT
FalsePositive	ALB72944	210	217	0.00678	-2.16877	TNGQGLYP
FalsePositive	APT69836	226	233	0.00678	-2.16877	NDRENNNS
FalsePositive	YP_009344963	612	619	0.00678	-2.16877	VATHGVAE
FalsePositive	AAZ73345	693	700	0.00678	-2.16877	TTEQSTTY
FalsePositive	ACK37433	700	707	0.00678	-2.16877	IAAESDSV
FalsePositive	QEJ82281	993	1000	0.00678	-2.16877	ADIRNLLW
FalsePositive	AAQ73097	1126	1133	0.00678	-2.16877	TKIQKFIE
FalsePositive	ACU00185	1221	1228	0.00678	-2.16877	VIAHGLTN
FalsePositive	ACV51798	1722	1729	0.00678	-2.16877	VLSQKDPR
FalsePositive	AUD08527	214	221	0.00681	-2.16685	SISEGETA
FalsePositive	APT69842	225	232	0.00681	-2.16685	VGQQRDAN
FalsePositive	ALP31161	306	313	0.00681	-2.16685	CEFNGLRH
FalsePositive	ADU34211	371	378	0.00681	-2.16685	NNVEGEDG
FalsePositive	APT69839	563	570	0.00681	-2.16685	THTQLVPI
FalsePositive	AEL31289	565	572	0.00681	-2.16685	TLQNNDPV
FalsePositive	ABF51197	565	572	0.00681	-2.16685	HMQEGVLE
FalsePositive	AUO29156	698	705	0.00681	-2.16685	STRQNTDT
FalsePositive	YP_009243645	877	884	0.00681	-2.16685	VDAHGIDT
FalsePositive	APT69822	1140	1147	0.00681	-2.16685	ASEEAQNE
FalsePositive	ARD27152	1165	1172	0.00681	-2.16685	SLLENQIS
FalsePositive	ABM54551	1277	1284	0.00681	-2.16685	AIAEREST
FalsePositive	AUF49658	1457	1464	0.00681	-2.16685	VAPENPPP
FalsePositive	ABF51180	1584	1591	0.00681	-2.16685	VLVNGQAV
FalsePositive	ARA15405	1722	1729	0.00681	-2.16685	TSKQKVRD
FalsePositive	ABF51181	1726	1733	0.00681	-2.16685	VARQKLKD
FalsePositive	APT69825	2078	2085	0.00681	-2.16685	DIHESIRW
FalsePositive	ADU34211	702	709	0.00683	-2.16558	TLPENQDT
FalsePositive	AHK24839	833	840	0.00683	-2.16558	TTRESIKN
FalsePositive	AAZ73343	885	892	0.00683	-2.16558	VDAHGADT
FalsePositive	AEL31289	1933	1940	0.00683	-2.16558	IWFQALGK
FalsePositive	BAA00168	1942	1949	0.00683	-2.16558	VWFQALKK
FalsePositive	AGP75905	11	18	0.00686	-2.16368	GTHQNSNS
FalsePositive	ARO77045	197	204	0.00686	-2.16368	PEHQLASH
FalsePositive	AKE33309	234	241	0.00686	-2.16368	DVQQAVYN
FalsePositive	AUF49662	1176	1183	0.00686	-2.16368	ASQENLEA
FalsePositive	YP_009020973	1248	1255	0.00686	-2.16368	YQEQAVVV
FalsePositive	AGV98963	1763	1770	0.00686	-2.16368	DVFEGNKK
FalsePositive	ACZ28901	1777	1784	0.00686	-2.16368	YIFEGVKE
FalsePositive	ACK37379	2037	2044	0.00686	-2.16368	IAKEGIKY
FalsePositive	APT68347	210	217	0.00689	-2.16178	PNGQGLYP
FalsePositive	ACK37404	388	395	0.00689	-2.16178	NNTQANLK
FalsePositive	ACK37379	566	573	0.00689	-2.16178	VQSEAIEQ
FalsePositive	CAD67522	582	589	0.00689	-2.16178	DIIEGVVE
FalsePositive	ALB72976	588	595	0.00689	-2.16178	TSVESAAN
FalsePositive	AFD53622	610	617	0.00689	-2.16178	PALQAADI
FalsePositive	AEO51787	887	894	0.00689	-2.16178	HQNQAVYV
FalsePositive	ABU62849	1225	1232	0.00689	-2.16178	VIARGLAD
FalsePositive	AHM88285	1305	1312	0.00689	-2.16178	ALEEKAIL
FalsePositive	ABF51206	1423	1430	0.00689	-2.16178	DLLQAVRT
FalsePositive	ABU41836	671	678	0.00692	-2.15989	NFNESASV
FalsePositive	AIB00579	1199	1206	0.00692	-2.15989	ILFNNVRW
FalsePositive	ANV28236	1780	1787	0.00692	-2.15989	YVFEGIKE
FalsePositive	ACY40750	662	669	0.00695	-2.15802	TTRQAAQL
FalsePositive	BAK08577	689	696	0.00695	-2.15802	VAVNGNSS
FalsePositive	AHK24839	820	827	0.00695	-2.15802	ADENSPLK
FalsePositive	AUO29151	851	858	0.00695	-2.15802	AIRPAEYT
FalsePositive	ABV25904	1034	1041	0.00695	-2.15802	REIQNIKD
FalsePositive	BAZ95883	1551	1558	0.00695	-2.15802	NKKPSIPT
FalsePositive	ANV28267	1778	1785	0.00695	-2.15802	YVFEGAKE
FalsePositive	ADK22846	2166	2173	0.00695	-2.15802	AWHNGAVD
FalsePositive	CAC82172	214	221	0.00698	-2.15614	GLSEGETA
FalsePositive	APT69828	230	237	0.00698	-2.15614	NTHNNLPS
FalsePositive	YP_009353025	402	409	0.00698	-2.15614	TLSEGSIL
FalsePositive	AMK37996	491	498	0.00698	-2.15614	IGLQSTVS
FalsePositive	AAP68876	582	589	0.00698	-2.15614	DVIEGAVE
FalsePositive	YP_009259673	796	803	0.00698	-2.15614	VVSENVSG
FalsePositive	AAX47033	838	845	0.00698	-2.15614	AARRNITD
FalsePositive	AKA64452	1260	1267	0.00698	-2.15614	DLNQNPDG
FalsePositive	AVK51671	1336	1343	0.00698	-2.15614	IEIQKEYK
FalsePositive	YP_009344963	185	192	0.00701	-2.15428	KFHQGLLL
FalsePositive	ABF51196	298	305	0.00701	-2.15428	CPLESLPS
FalsePositive	NP_045756	373	380	0.00701	-2.15428	NNREGVEG
FalsePositive	ASW23000	630	637	0.00701	-2.15428	ALLENFLG
FalsePositive	NP_653149	913	920	0.00701	-2.15428	SSVHGNNW
FalsePositive	NP_040760	990	997	0.00701	-2.15428	AGGEGIVA
FalsePositive	ABO69379	1722	1729	0.00701	-2.15428	VSRQKVRE
FalsePositive	ANN46831	2148	2155	0.00701	-2.15428	AWHNGEET
FalsePositive	ABO76708	322	329	0.00704	-2.15243	GARQSAKA
FalsePositive	ACK37396	327	334	0.00704	-2.15243	AKPNAAPQ
FalsePositive	YP_009020973	679	686	0.00704	-2.15243	VDEQAKVK
FalsePositive	AAS86318	1153	1160	0.00704	-2.15243	TQEQLFSN
FalsePositive	ABM54538	1270	1277	0.00704	-2.15243	AIAEKEST
FalsePositive	AFH66790	519	526	0.00707	-2.15058	IWYQANYV
FalsePositive	AAQ73097	569	576	0.00707	-2.15058	DQHNGAIV
FalsePositive	AUD08530	592	599	0.00707	-2.15058	TNSQAVPA
FalsePositive	ACK37409	593	600	0.00707	-2.15058	KYTQSVPT
FalsePositive	AAF21971	656	663	0.00707	-2.15058	NFAQWVIN
FalsePositive	ACK37380	1274	1281	0.00707	-2.15058	DLNQNPNG
FalsePositive	ABV00561	1548	1555	0.00707	-2.15058	TKRPNVPT
FalsePositive	APT69825	2103	2110	0.00707	-2.15058	AWHNGEEQ
FalsePositive	ANQ44601	112	119	0.0071	-2.14874	NDSEANPV
FalsePositive	AEE25814	112	119	0.0071	-2.14874	APSEANPV
FalsePositive	ABU62848	158	165	0.0071	-2.14874	IFGQNLYH
FalsePositive	ABM21507	571	578	0.0071	-2.14874	ITQEALPQ
FalsePositive	AAO88056	586	593	0.0071	-2.14874	GVVEGVTR
FalsePositive	ABU62848	599	606	0.0071	-2.14874	AMEIGASS
FalsePositive	AEE25815	635	642	0.0071	-2.14874	ASGQAVPA
FalsePositive	AIA21703	1042	1049	0.0071	-2.14874	TRSQGDMP
FalsePositive	APT69825	1201	1208	0.0071	-2.14874	ILLHGIPG
FalsePositive	ABM54549	1279	1286	0.0071	-2.14874	AEKENTSL
FalsePositive	ALC74272	112	119	0.00713	-2.14691	APQEANPV
FalsePositive	AUF49622	112	119	0.00713	-2.14691	NDQEANPV
FalsePositive	QEG13937	373	380	0.00713	-2.14691	NNTEGANG
FalsePositive	AEB33908	1136	1143	0.00713	-2.14691	PLLEAQIT
FalsePositive	AJO54282	1337	1344	0.00713	-2.14691	RNSQGLLD
FalsePositive	ACK37443	41	48	0.00716	-2.14509	SASQSFSM
FalsePositive	AJO54282	885	892	0.00716	-2.14509	VREPGEDF
FalsePositive	ANZ02994	315	322	0.00719	-2.14327	RLRQAVSQ
FalsePositive	ABO69377	465	472	0.00719	-2.14327	PGAPGPTN
FalsePositive	ACK37370	700	707	0.00719	-2.14327	IAAESESV
FalsePositive	NP_040760	1018	1025	0.00719	-2.14327	DYIQNLGS
FalsePositive	AHK24839	1183	1190	0.00719	-2.14327	KIQQNLKQ
FalsePositive	BAA24003	490	497	0.00722	-2.14146	SHFRGVSN
FalsePositive	BAW98045	1143	1150	0.00722	-2.14146	TLEHSNPN
FalsePositive	ACK37428	2077	2084	0.00722	-2.14146	AQFHKITW
FalsePositive	AUD08541	214	221	0.00726	-2.13906	GISEGETA
FalsePositive	ACK37405	401	408	0.00726	-2.13906	VQLQRQAE
FalsePositive	ACK37423	587	594	0.00726	-2.13906	NIKESKPS
FalsePositive	ACK37418	838	845	0.00726	-2.13906	DGSQSIIP
FalsePositive	AKA64451	1132	1139	0.00726	-2.13906	NLKQLPLL
FalsePositive	ANV28236	2169	2176	0.00726	-2.13906	AWHNGEED
FalsePositive	AGM16002	373	380	0.00729	-2.13727	NNREGVAG
FalsePositive	AEE01039	402	409	0.00729	-2.13727	NLSEGSIM
FalsePositive	QEG13932	557	564	0.00729	-2.13727	NAAEAAYQ
FalsePositive	AAQ73093	591	598	0.00729	-2.13727	ANSESVPA
FalsePositive	AJC11325	850	857	0.00729	-2.13727	KDRQSIKT
FalsePositive	ACK37388	1414	1421	0.00729	-2.13727	IDMQAPPP
FalsePositive	AFR23507	5	12	0.00732	-2.13549	ASTQRSGS
FalsePositive	YP_009259673	412	419	0.00732	-2.13549	PGREGPWQ
FalsePositive	AGS09862	571	578	0.00732	-2.13549	HIEQKAIT
FalsePositive	ALB72953	595	602	0.00732	-2.13549	VSTHSLGT
FalsePositive	CAA59341	693	700	0.00732	-2.13549	TSYQRQGT
FalsePositive	AMB19798	1086	1093	0.00732	-2.13549	NAARGLEW
FalsePositive	BAE20392	1740	1747	0.00732	-2.13549	YFTQNQGE
FalsePositive	AKA64451	377	384	0.00735	-2.13371	TGVQRLRI
FalsePositive	AIB00631	1003	1010	0.00735	-2.13371	AGGEGLVA
FalsePositive	BAW98046	1336	1343	0.00735	-2.13371	IEVQKEYR
FalsePositive	ABF51203	1461	1468	0.00735	-2.13371	NLANNIIT
FalsePositive	AGS09857	1743	1750	0.00735	-2.13371	YFVQNQGE
FalsePositive	ABF51194	1943	1950	0.00735	-2.13371	VWFQALKL
FalsePositive	AUO29150	532	539	0.00738	-2.13194	ADTQSDCK
FalsePositive	ABM54550	607	614	0.00738	-2.13194	ALTNSAAS
FalsePositive	ANJ61740	644	651	0.00738	-2.13194	ASSEAQTD
FalsePositive	ABF51204	1562	1569	0.00738	-2.13194	VQINGINV
FalsePositive	AFS30772	2078	2085	0.00738	-2.13194	SMNQLDGQ
FalsePositive	ABF51206	84	91	0.00741	-2.13018	QITRGDST
FalsePositive	ALI31819	571	578	0.00741	-2.13018	ISQEAIPQ
FalsePositive	ACK37373	589	596	0.00741	-2.13018	NISESKPT
FalsePositive	AOW42548	724	731	0.00741	-2.13018	PVPESVDD
FalsePositive	ANV28245	1506	1513	0.00741	-2.13018	AQTERNIN
FalsePositive	AGO01890	1532	1539	0.00741	-2.13018	TPKQALKK
FalsePositive	ACK37427	1577	1584	0.00741	-2.13018	YNKQGIKL
FalsePositive	AQM32742	1857	1864	0.00741	-2.13018	SLIEGINH
FalsePositive	ACN59569	185	192	0.00744	-2.12843	KFHQGVLL
FalsePositive	ABM54527	232	239	0.00744	-2.12843	ATTQATRK
FalsePositive	APR72754	415	422	0.00744	-2.12843	PLQPGASS
FalsePositive	AHX57712	729	736	0.00744	-2.12843	DSRESLTW
FalsePositive	ABF51201	859	866	0.00744	-2.12843	VMTAGPSD
FalsePositive	ABM54519	1061	1068	0.00744	-2.12843	SMVNSVIT
FalsePositive	ACK37435	1256	1263	0.00744	-2.12843	DIMQNPAG
FalsePositive	ARB07836	2167	2174	0.00744	-2.12843	HEYEGFIE
FalsePositive	YP_009020973	374	381	0.00747	-2.12668	VNVEGVER
FalsePositive	AAA45762	393	400	0.00747	-2.12668	NTQENVRS
FalsePositive	APT69812	648	655	0.00747	-2.12668	CIHESTIT
FalsePositive	APT69822	875	882	0.00747	-2.12668	ADSPGPDH
FalsePositive	ACK37376	1587	1594	0.00747	-2.12668	HNSQGIKL
FalsePositive	AHL77761	1753	1760	0.00747	-2.12668	YIFEGNKE
FalsePositive	AHL77761	204	211	0.0075	-2.12494	TNVENAPA
FalsePositive	AJC11330	317	324	0.0075	-2.12494	GLRQATSQ
FalsePositive	BAG70422	319	326	0.0075	-2.12494	AEYNGLRM
FalsePositive	ABF51184	385	392	0.0075	-2.12494	NNAEGITG
FalsePositive	AAD19342	563	570	0.0075	-2.12494	VEQEADLQ
FalsePositive	AAZ73345	584	591	0.0075	-2.12494	TSSHGVAT
FalsePositive	CAC07403	922	929	0.0075	-2.12494	SRAQGTDS
FalsePositive	ADU34211	1130	1137	0.0075	-2.12494	NLRQLPLL
FalsePositive	ACK37367	1561	1568	0.0075	-2.12494	VQVNGVHT
FalsePositive	AAL69631	1922	1929	0.0075	-2.12494	AAFHSNPG
FalsePositive	AGV98956	18	25	0.00754	-2.12263	SASEGLTI
FalsePositive	AVM86032	93	100	0.00754	-2.12263	TTQESANV
FalsePositive	APT68350	224	231	0.00754	-2.12263	PGKNGQEF
FalsePositive	APX43287	579	586	0.00754	-2.12263	PSGQANST
FalsePositive	ABF51185	589	596	0.00754	-2.12263	NISESSPT
FalsePositive	AKZ66533	619	626	0.00754	-2.12263	ASDENLVE
FalsePositive	ABF51182	728	735	0.00754	-2.12263	PGAPNPIE
FalsePositive	ABO76708	1216	1223	0.00754	-2.12263	VIARGLTS
FalsePositive	ANZ02994	1302	1309	0.00754	-2.12263	SRREGILY
FalsePositive	AUN27641	1532	1539	0.00754	-2.12263	PPKQALKK
FalsePositive	ATZ76015	1706	1713	0.00754	-2.12263	ATECGLPT
FalsePositive	ACK37382	197	204	0.00757	-2.1209	PEHQLANE
FalsePositive	APT69810	298	305	0.00757	-2.1209	CQLEGTPG
FalsePositive	AAX47042	691	698	0.00757	-2.1209	TSYQKQGT
FalsePositive	ABF51201	795	802	0.00757	-2.1209	TEQQKNEV
FalsePositive	ABM54525	871	878	0.00757	-2.1209	PLSQKNLT
FalsePositive	BAK57448	1037	1044	0.00757	-2.1209	TLKESLVG
FalsePositive	AFY09605	1122	1129	0.00757	-2.1209	IKIQKFID
FalsePositive	AWW21311	1924	1931	0.00757	-2.1209	TFQHNPGT
FalsePositive	AQV09961	2130	2137	0.00757	-2.1209	DIHESVRW
FalsePositive	AMB19800	101	108	0.0076	-2.11919	AYAQWPEY
FalsePositive	AEL31290	615	622	0.0076	-2.11919	ATPESTIE
FalsePositive	YP_003358790	632	639	0.0076	-2.11919	SSVESFYS
FalsePositive	AEO51778	746	753	0.0076	-2.11919	APTPGARD
FalsePositive	ACK37411	851	858	0.0076	-2.11919	AKRENIMK
FalsePositive	ANJ61749	1119	1126	0.0076	-2.11919	NALRGLDW
FalsePositive	AUF49645	1754	1761	0.0076	-2.11919	VFHQAFEG
FalsePositive	BAG70419	2127	2134	0.0076	-2.11919	DIRESIRW
FalsePositive	AJO54281	195	202	0.00763	-2.11748	PEHQLAYA
FalsePositive	AGN90901	233	240	0.00763	-2.11748	NDVQRAVH
FalsePositive	BAW98047	279	286	0.00763	-2.11748	PLVQLEYA
FalsePositive	ABM54545	599	606	0.00763	-2.11748	PKPQKQPI
FalsePositive	ABK88241	645	652	0.00763	-2.11748	TGTQKVQQ
FalsePositive	BAG70422	1093	1100	0.00763	-2.11748	SQYHGIPM
FalsePositive	ANJ61595	1160	1167	0.00763	-2.11748	PVIESQIS
FalsePositive	AEL31289	1414	1421	0.00763	-2.11748	TQPPGFIV
FalsePositive	ACK37413	1459	1466	0.00763	-2.11748	NIANNIIT
FalsePositive	ACK37391	2035	2042	0.00763	-2.11748	IAKEGVKY
FalsePositive	AJO54281	2086	2093	0.00763	-2.11748	DVHESIRW
FalsePositive	AJO54283	322	329	0.00766	-2.11577	GARQSVAA
FalsePositive	ACV51798	389	396	0.00766	-2.11577	SQIQKVGV
FalsePositive	ANQ69417	853	860	0.00766	-2.11577	TMPRNIVT
FalsePositive	AUD08542	858	865	0.00766	-2.11577	VLNHGAYG
FalsePositive	AGA12360	923	930	0.00766	-2.11577	SKAQGTDL
FalsePositive	ABF51205	1747	1754	0.00766	-2.11577	VDFEKAIF
FalsePositive	AMB19800	1929	1936	0.00766	-2.11577	VWFQALGR
FalsePositive	CAD67522	2180	2187	0.00766	-2.11577	AKIRSAPI
FalsePositive	ALB72963	66	73	0.0077	-2.11351	APLNSPSV
FalsePositive	ACD78146	93	100	0.0077	-2.11351	TTHEAATS
FalsePositive	AAW30683	377	384	0.0077	-2.11351	IEVNNLST
FalsePositive	YP_009259673	594	601	0.0077	-2.11351	ASNHSIGT
FalsePositive	AUF49654	663	670	0.0077	-2.11351	TTRQAVQL
FalsePositive	ACK37412	839	846	0.0077	-2.11351	NTDESIPD
FalsePositive	AAQ04834	1277	1284	0.0077	-2.11351	AIAEKEGT
FalsePositive	AGV98962	1763	1770	0.0077	-2.11351	GVFEGSRE
FalsePositive	ACX85866	1777	1784	0.0077	-2.11351	YVFEGVKE
FalsePositive	ACK37396	305	312	0.00773	-2.11182	ATSQVPIT
FalsePositive	AAR06974	386	393	0.00773	-2.11182	NNTEGKVV
FalsePositive	AAQ73076	600	607	0.00773	-2.11182	HTSQAVPS
FalsePositive	AWW21301	613	620	0.00773	-2.11182	VNQHGVSE
FalsePositive	YP_009028564	648	655	0.00773	-2.11182	TTTNGFTV
FalsePositive	CAJ01902	793	800	0.00773	-2.11182	VPLEGQAS
FalsePositive	ALB72947	838	845	0.00773	-2.11182	SYSQAIIN
FalsePositive	AUO29158	1548	1555	0.00773	-2.11182	NKKPSVPT
FalsePositive	AEO78970	112	119	0.00776	-2.11014	NDKEANPI
FalsePositive	ABV25904	248	255	0.00776	-2.11014	APHQWINL
FalsePositive	ABM21518	311	318	0.00776	-2.11014	ATQQVPIT
FalsePositive	APU57649	700	707	0.00776	-2.11014	SQSENIGH
FalsePositive	AFQ55938	1050	1057	0.00776	-2.11014	SEIQSTVQ
FalsePositive	ALM88626	1473	1480	0.00776	-2.11014	PEFNSDLQ
FalsePositive	ABF51198	351	358	0.00779	-2.10846	DDMQSPSA
FalsePositive	AMB19800	363	370	0.00779	-2.10846	IHIPGEIT
FalsePositive	AVK51671	490	497	0.00779	-2.10846	SHFRGVSI
FalsePositive	APT68343	571	578	0.00779	-2.10846	NAVESAVI
FalsePositive	AIB00523	600	607	0.00779	-2.10846	TSTNSLPD
FalsePositive	AFQ55938	1000	1007	0.00779	-2.10846	AGGEGVVA
FalsePositive	ABV25903	1062	1069	0.00779	-2.10846	IIVRSEYD
FalsePositive	ACK37410	1956	1963	0.00779	-2.10846	GFEPGLID
FalsePositive	YP_001552411	2103	2110	0.00779	-2.10846	AWHNGEEV
FalsePositive	BAZ95883	324	331	0.00783	-2.10624	CEFQWNLR
FalsePositive	AFV25598	387	394	0.00783	-2.10624	NVSENVNS
FalsePositive	AKA64452	488	495	0.00783	-2.10624	GHFRGVAD
FalsePositive	AHK24838	698	705	0.00783	-2.10624	PGIEAPES
FalsePositive	ABL61316	1163	1170	0.00783	-2.10624	PIIESQIN
FalsePositive	AFO42819	416	423	0.00786	-2.10458	PLIPGASS
FalsePositive	ABM54545	605	612	0.00786	-2.10458	PIAQSTAS
FalsePositive	AAA50478	663	670	0.00786	-2.10458	TGTQNTDG
FalsePositive	ABO69376	668	675	0.00786	-2.10458	HKEQGLFN
FalsePositive	YP_003358790	1596	1603	0.00786	-2.10458	IDSEGVNL
FalsePositive	YP_009259673	205	212	0.00789	-2.10292	STEQKPNI
FalsePositive	ABU41836	232	239	0.00789	-2.10292	AATQASRK
FalsePositive	ACK37424	323	330	0.00789	-2.10292	IRSQAVKI
FalsePositive	AAR38844	571	578	0.00789	-2.10292	NAIENAVS
FalsePositive	YP_007985635	614	621	0.00789	-2.10292	VNTHGVEE
FalsePositive	AHG06624	692	699	0.00789	-2.10292	SVDQNNRF
FalsePositive	AFN88507	729	736	0.00789	-2.10292	DSRESLVW
FalsePositive	ASZ70601	1201	1208	0.00789	-2.10292	ILLHGVPG
FalsePositive	AMB19798	1875	1882	0.00789	-2.10292	AGFHANPG
FalsePositive	ABU62849	226	233	0.00792	-2.10127	NTERNDKQ
FalsePositive	AFQ55938	570	577	0.00792	-2.10127	HVIQSNAV
FalsePositive	ANN02908	624	631	0.00792	-2.10127	VNVHGVEE
FalsePositive	ASZ70601	751	758	0.00792	-2.10127	NKTESVAY
FalsePositive	ABF51201	1583	1590	0.00792	-2.10127	YNTQGVKL
FalsePositive	ACK37412	1957	1964	0.00792	-2.10127	LGFQGDLV
FalsePositive	ABF51201	2092	2099	0.00792	-2.10127	IYPESEVW
FalsePositive	YP_009246449	11	18	0.00796	-2.09909	GEHENALI
FalsePositive	AAQ73096	227	234	0.00796	-2.09909	TKTNGEHT
FalsePositive	AJO54282	632	639	0.00796	-2.09909	TNVEAEIE
FalsePositive	AFD32988	693	700	0.00796	-2.09909	AQDQSTVS
FalsePositive	CAD38168	704	711	0.00796	-2.09909	VNNEAPIT
FalsePositive	ACT31465	934	941	0.00796	-2.09909	SNAQGTDT
FalsePositive	AAQ73078	390	397	0.00799	-2.09745	GHLQSVDA
FalsePositive	ANV28231	477	484	0.00799	-2.09745	PGAEAPKS
FalsePositive	ABF51181	597	604	0.00799	-2.09745	KHTQSVPM
FalsePositive	ABM54518	602	609	0.00799	-2.09745	PINEAAST
FalsePositive	AAX47036	647	654	0.00799	-2.09745	AKYEAKST
FalsePositive	QEJ82276	689	696	0.00799	-2.09745	VAVNGNSN
FalsePositive	ACK37407	706	713	0.00799	-2.09745	ASQPNASE
FalsePositive	QEG13925	765	772	0.00799	-2.09745	AGFERNGL
FalsePositive	AHL27172	797	804	0.00799	-2.09745	GATQRPLV
FalsePositive	ABA43708	829	836	0.00799	-2.09745	NILNNNYV
FalsePositive	ARC95292	1042	1049	0.00799	-2.09745	TRSEGDVP
FalsePositive	AUD09287	1155	1162	0.00799	-2.09745	SWLQGKII
FalsePositive	AFS30772	1216	1223	0.00799	-2.09745	IIARGLTQ
FalsePositive	AGA12517	1549	1556	0.00799	-2.09745	NKRPSVPT
FalsePositive	AIZ97150	1642	1649	0.00799	-2.09745	TREEAEVS
FalsePositive	APT69843	1759	1766	0.00799	-2.09745	VLHPGDSR
FalsePositive	ACK37373	2042	2049	0.00799	-2.09745	IATEGNKY
FalsePositive	ADK22846	2125	2132	0.00799	-2.09745	ADEQFPYL
FalsePositive	AJB44634	201	208	0.00802	-2.09583	IQAQATPS
FalsePositive	AGV98961	247	254	0.00802	-2.09583	CPHQWISL
FalsePositive	AAQ73077	726	733	0.00802	-2.09583	SGAESFAW
FalsePositive	ADO24588	1813	1820	0.00802	-2.09583	TLKEALYG
FalsePositive	ACK37403	1957	1964	0.00802	-2.09583	QILENLGF
FalsePositive	ABF51186	2042	2049	0.00802	-2.09583	IAVEGNKY
FalsePositive	ABO69379	218	225	0.00806	-2.09366	PGENGIDL
FalsePositive	AQM32742	1022	1029	0.00806	-2.09366	NLKQLPLM
FalsePositive	ABO69380	1486	1493	0.00806	-2.09366	AVNQASTI
FalsePositive	YP_009243645	1563	1570	0.00806	-2.09366	AMANGTVQ
FalsePositive	ASW23000	363	370	0.00809	-2.09205	VHIPGEVT
FalsePositive	ABO69371	392	399	0.00809	-2.09205	ASKNNISM
FalsePositive	AUF49630	663	670	0.00809	-2.09205	TPRQAAQF
FalsePositive	ANJ61565	853	860	0.00809	-2.09205	TMPHNIVS
FalsePositive	ACK37391	298	305	0.00812	-2.09044	CPLEGTPT
FalsePositive	AEL31292	643	650	0.00812	-2.09044	KLNQGFKE
FalsePositive	AIM41611	877	884	0.00812	-2.09044	IAVESINT
FalsePositive	ACU00185	1138	1145	0.00812	-2.09044	YEEQAQGF
FalsePositive	CRL46950	1628	1635	0.00812	-2.09044	VREEAEVN
FalsePositive	AIN45140	214	221	0.00816	-2.08831	ALCEGDKA
FalsePositive	AAR38844	542	549	0.00816	-2.08831	AAQENFTL
FalsePositive	AEL31291	932	939	0.00816	-2.08831	GEGQSAPG
FalsePositive	ACU00185	1182	1189	0.00816	-2.08831	TNVQKELQ
FalsePositive	AIB00451	1274	1281	0.00816	-2.08831	AERENTSM
FalsePositive	ADJ37049	1483	1490	0.00816	-2.08831	IIPEAPTS
FalsePositive	AUF49670	2147	2154	0.00816	-2.08831	AWHNGEEE
FalsePositive	AFK66746	377	384	0.00819	-2.08672	VQEPGLLL
FalsePositive	NP_041009	465	472	0.00819	-2.08672	PGARGPQD
FalsePositive	BAW98045	614	621	0.00819	-2.08672	VNTHGVAE
FalsePositive	AGW83676	674	681	0.00819	-2.08672	APTQRASR
FalsePositive	ABO69371	1012	1019	0.00819	-2.08672	AFGQGFMS
FalsePositive	AVJ35777	1045	1052	0.00819	-2.08672	TRAEGDVP
FalsePositive	YP_001715611	1161	1168	0.00819	-2.08672	SIEHSAPS
FalsePositive	YP_001552411	1326	1333	0.00819	-2.08672	QGYQNQVG
FalsePositive	BAD72855	1504	1511	0.00819	-2.08672	NQVQLERN
FalsePositive	AIB00516	66	73	0.00823	-2.0846	PMLNSPNV
FalsePositive	AAQ04838	185	192	0.00823	-2.0846	KFHQGALG
FalsePositive	AAX47033	227	234	0.00823	-2.0846	SKEEGTSK
FalsePositive	AEB33908	341	348	0.00823	-2.0846	PKFEASPE
FalsePositive	ASZ69778	529	536	0.00823	-2.0846	IVPPGAPS
FalsePositive	YP_003358790	569	576	0.00823	-2.0846	QAIEGVIS
FalsePositive	AAR38846	1063	1070	0.00823	-2.0846	IVVRSDYD
FalsePositive	QEG13920	1283	1290	0.00823	-2.0846	DLMQNPDG
FalsePositive	ACK37372	1580	1587	0.00823	-2.0846	YNKQGVKL
FalsePositive	APT69842	1706	1713	0.00823	-2.0846	ASECGLPT
FalsePositive	AEL31293	158	165	0.00826	-2.08302	IFGQNLYY
FalsePositive	CAA63480	574	581	0.00826	-2.08302	QAVEGAIG
FalsePositive	AOL02449	591	598	0.00826	-2.08302	NKSNGQSS
FalsePositive	AFR77805	597	604	0.00826	-2.08302	NTQQSSHQ
FalsePositive	QEG13920	764	771	0.00826	-2.08302	AGFEKNGL
FalsePositive	QEG13939	1011	1018	0.00826	-2.08302	DYIQNLGN
FalsePositive	BAA24003	1221	1228	0.00826	-2.08302	GTGQSLAT
FalsePositive	AEO51787	1552	1559	0.00826	-2.08302	TRKPNIPT
FalsePositive	AAQ02676	112	119	0.0083	-2.08092	SDKEANPV
FalsePositive	AIN45139	205	212	0.0083	-2.08092	TINQAFTH
FalsePositive	ACK37410	389	396	0.0083	-2.08092	NTQENLKK
FalsePositive	CDQ47775	703	710	0.0083	-2.08092	TTPNGASK
FalsePositive	ADD23216	835	842	0.0083	-2.08092	TETRGKIT
FalsePositive	ABF51202	1582	1589	0.0083	-2.08092	HNSQGVKL
FalsePositive	AUO29149	2145	2152	0.0083	-2.08092	AWHNGERD
FalsePositive	AQM32742	75	82	0.00833	-2.07935	APHPGFTT
FalsePositive	ABO69377	218	225	0.00833	-2.07935	PGERGIDL
FalsePositive	AEL31293	388	395	0.00833	-2.07935	NNVESEIG
FalsePositive	ACU00186	629	636	0.00833	-2.07935	ALIENFLG
FalsePositive	ACK37409	847	854	0.00833	-2.07935	KKREGDIK
FalsePositive	AGS09856	883	890	0.00833	-2.07935	HGHQNKAV
FalsePositive	ACK37409	1815	1822	0.00833	-2.07935	TIKEALYG
FalsePositive	AKE33315	205	212	0.00836	-2.07779	VVGQAFPS
FalsePositive	AGW83677	585	592	0.00836	-2.07779	GAIEGITK
FalsePositive	ACU00186	625	632	0.00836	-2.07779	ANNEALIE
FalsePositive	ABF51200	728	735	0.00836	-2.07779	PRYRNDYT
FalsePositive	ACK37408	770	777	0.00836	-2.07779	DGYEGDAL
FalsePositive	AJO54281	834	841	0.00836	-2.07779	QHREGIKI
FalsePositive	APT69848	1753	1760	0.00836	-2.07779	YVFEGNKE
FalsePositive	AEO51780	213	220	0.0084	-2.07572	SYVQANPG
FalsePositive	AVK92956	661	668	0.0084	-2.07572	TGENNINT
FalsePositive	APT69836	701	708	0.0084	-2.07572	IAGQGNDI
FalsePositive	AMB19800	1148	1155	0.0084	-2.07572	QEAQNELC
FalsePositive	ABF51198	1210	1217	0.0084	-2.07572	GGKRNEPV
FalsePositive	ABL61316	60	67	0.00843	-2.07417	ALKAGAPV
FalsePositive	AAX47041	233	240	0.00843	-2.07417	NDVQRVVH
FalsePositive	AEL31291	400	407	0.00843	-2.07417	TVTQKADN
FalsePositive	AAD19342	407	414	0.00843	-2.07417	TTVRGDAI
FalsePositive	AFV92902	585	592	0.00843	-2.07417	DALEGLVE
FalsePositive	ARC95293	622	629	0.00843	-2.07417	TSVESFYG
FalsePositive	AGA18498	860	867	0.00843	-2.07417	DYKQNSPV
FalsePositive	AMB19798	874	881	0.00843	-2.07417	TDTPGPDN
FalsePositive	ALP31131	937	944	0.00843	-2.07417	PGIQWIQQ
FalsePositive	AOW42548	1156	1163	0.00843	-2.07417	PFLESQIS
FalsePositive	AEL31289	1222	1229	0.00843	-2.07417	VVARGLTS
FalsePositive	ABM21518	1638	1645	0.00843	-2.07417	TLERNEKF
FalsePositive	AKE33315	1771	1778	0.00843	-2.07417	HAFEGNKE
FalsePositive	AAS86318	1789	1796	0.00843	-2.07417	QLKQLDID
FalsePositive	AAV27300	1946	1953	0.00843	-2.07417	ALKQVLSD
FalsePositive	AEO78969	2187	2194	0.00843	-2.07417	AEIRSVPI
FalsePositive	APZ85756	140	147	0.00847	-2.07212	WEKQSPGW
FalsePositive	AUD08530	210	217	0.00847	-2.07212	VNEHSISD
FalsePositive	AAQ02683	1343	1350	0.00847	-2.07212	ASTNSNII
FalsePositive	APT69823	1411	1418	0.00847	-2.07212	NETPGFII
FalsePositive	AAG23918	1415	1422	0.00847	-2.07212	NHRHSVGT
FalsePositive	ALC74272	2178	2185	0.00847	-2.07212	AWHNGEAE
FalsePositive	BAA00516	2178	2185	0.00847	-2.07212	AKIRSVPI
FalsePositive	AEB33908	136	143	0.0085	-2.07058	PSVQWTPT
FalsePositive	ABM21515	417	424	0.0085	-2.07058	SVREAPIL
FalsePositive	APT69825	845	852	0.0085	-2.07058	HTEQAIYR
FalsePositive	AFO64932	1120	1127	0.0085	-2.07058	IKIQKFIE
FalsePositive	APT69825	1178	1185	0.0085	-2.07058	TQMQKEIK
FalsePositive	ABM54548	1505	1512	0.0085	-2.07058	VKVNNDLV
FalsePositive	AIZ97150	647	654	0.00854	-2.06854	YHTQNDQE
FalsePositive	ACK37428	794	801	0.00854	-2.06854	VVNENDVH
FalsePositive	ACV51798	875	882	0.00854	-2.06854	TSIPGPDT
FalsePositive	ACK37416	1262	1269	0.00854	-2.06854	DIMQNPDG
FalsePositive	ABF51205	1603	1610	0.00854	-2.06854	PESESDYP
FalsePositive	AUN27639	1784	1791	0.00854	-2.06854	DFEQALLS
FalsePositive	ACK37381	2055	2062	0.00854	-2.06854	CFKQLNYN
FalsePositive	AAQ02679	112	119	0.00857	-2.06702	SDREANPV
FalsePositive	BAW98045	214	221	0.00857	-2.06702	PGERGAAY
FalsePositive	YP_009020973	214	221	0.00857	-2.06702	PGENGATC
FalsePositive	ALB72930	220	227	0.00857	-2.06702	ATQPGPDG
FalsePositive	AHB78922	729	736	0.00857	-2.06702	DSKESLAW
FalsePositive	AAQ73087	795	802	0.00857	-2.06702	ATIPNLIS
FalsePositive	BAK57449	1163	1170	0.00857	-2.06702	PLLENQIA
FalsePositive	ASU64357	298	305	0.00861	-2.065	NFNEGATA
FalsePositive	APT69838	367	374	0.00861	-2.065	GQVHNLSE
FalsePositive	ABV00677	387	394	0.00861	-2.065	NNVEGKLD
FalsePositive	ASZ69778	387	394	0.00861	-2.065	NTKENING
FalsePositive	ADD23216	470	477	0.00861	-2.065	ASVPGNRK
FalsePositive	AGN90901	718	725	0.00861	-2.065	PIPESVDS
[truncated: 24,064 more rows]

## Sheet: S4C. Human sites
Supplemental Table S3C. Un-optimized 3C cleavage motif scores for reported human cleavage sites from Laitinen et al 2016 dataset.
MatchType	sequence_name	p-value	log10_p-val	matched_sequence
HumanSite	G3BP1	7.16e-07	-6.14509	AGEQGDIE
HumanSite	EIF5B	2.69e-06	-5.57025	VMEQGVPE
HumanSite	UNC93B1	2.23e-05	-4.6517	AGPQGDED
HumanSite	SSB	0.000329	-3.4828	VQFQGKKT
HumanSite	RIPK3	0.000481	-3.31785	AERQGMNW
HumanSite	PTK2	0.000571	-3.24336	GSLQGPIG
HumanSite	MAP3K7	0.000605	-3.21824	AKQQSESG
HumanSite	TBP	0.00061	-3.21467	ASPQGAMT
HumanSite	NBR1	0.00126	-2.89963	ALPEGPLG
HumanSite	POU2F1	0.00152	-2.81816	GFTQGDVG
HumanSite	PABPC1	0.00195	-2.70997	VHVQGQEP
HumanSite	TAB1	0.0029	-2.5376	THTQSSSS
HumanSite	TAB3	0.00325	-2.48812	SAMQGPSP
HumanSite	MAVS	0.00361	-2.44249	QETQAPES
HumanSite	CREB1	0.0107	-1.97062	AITQGGAI
HumanSite	RELA	0.0115	-1.9393	LLNQGIPV
HumanSite	TAB3	0.0131	-1.88273	YQKQGSHS
HumanSite	NFKBIA	0.0324	-1.48945	VTYQGYSP
HumanSite	HNRNPM	0.0345	-1.46218	IAKQGGGG
HumanSite	CSTF2	0.0433	-1.36351	ASMQGGVP
HumanSite	TAB2	0.0433	-1.36351	GQLQGGQS
HumanSite	IRF7	0.0498	-1.30277	AVQQSCLA
HumanSite	PABPC1	0.0516	-1.28735	WTAQGARP
HumanSite	PABPC1	0.0576	-1.23958	AIPQTQNR
HumanSite	TAB1	0.0946	-1.02411	MPSQGQMV
HumanSite	PCBP2	0.109	-0.962574	AMQQSHFP
HumanSite	TICAM1	0.413	-0.38405	FALQTINA
