# Supplementary material for: Diverse viral proteases activate the NLRP1 inflammasome
Source: bioRxiv preprint, doi:10.1101/2020.10.16.343426, version 1 (2020-10-17)
Supplement: Supplemental File 4 [file 343426_file05.xlsx]

## Sheet: SF4A. True positives
Supplemental File 4A. Optimized 3C cleavage motif scores for True Positive hits within enteroviral polyprotein dataset
MatchType	sequence_name	start_pos	stop_pos	p-value	log10_p-val	matched_sequence
TruePositive	ANN02908	1423	1430	8.13e-07	-6.08991	ALFQGPMC
TruePositive	ADK22846	1120	1127	1.17e-06	-5.93181	AMKQGDSW
TruePositive	AFK79845	1496	1503	1.78e-06	-5.74958	AMIQGPEH
TruePositive	ACK37418	1509	1516	1.78e-06	-5.74958	AQMQGPYS
TruePositive	AAL69631	1519	1526	2.11e-06	-5.67572	ANFQGPYT
TruePositive	NP_653149	1530	1537	2.11e-06	-5.67572	ANFQGPYT
TruePositive	NP_653149	1530	1537	2.11e-06	-5.67572	ANFQGPYT
TruePositive	ABM54528	1538	1545	2.41e-06	-5.61798	AGHQGPYT
TruePositive	ABK88241	1525	1532	3.04e-06	-5.51713	AGMQGPYT
TruePositive	ACI23463	1423	1430	3.15e-06	-5.50169	ALFQGPPM
TruePositive	ATG80398	1424	1431	3.15e-06	-5.50169	ALFQGPPM
TruePositive	ADD23216	1424	1431	3.15e-06	-5.50169	ALFQGPPM
TruePositive	AGV00137	1432	1439	3.15e-06	-5.50169	ALFQGPPM
TruePositive	AGV00138	1432	1439	3.15e-06	-5.50169	ALFQGPPM
TruePositive	AKL71247	1433	1440	3.15e-06	-5.50169	ALFQGPPM
TruePositive	AUF49624	1435	1442	3.15e-06	-5.50169	ALFQGPPM
TruePositive	AUD08531	1436	1443	3.15e-06	-5.50169	ALFQGPPM
TruePositive	AMD82546	1442	1449	3.15e-06	-5.50169	ALFQGPPM
TruePositive	YP_009246449	1523	1530	4.07e-06	-5.39041	AGFQGPYN
TruePositive	ACK37418	997	1004	4.2e-06	-5.37675	AHYQGIPD
TruePositive	ABM54526	1452	1459	4.34e-06	-5.36251	ALFQGPMQ
TruePositive	YP_009246449	1107	1114	5.56e-06	-5.25493	AQRQGESW
TruePositive	AAX47033	328	335	5.74e-06	-5.24109	AHHQGLPV
TruePositive	BAG70421	328	335	5.74e-06	-5.24109	AHHQGLPV
TruePositive	ACU00186	975	982	5.91e-06	-5.22841	AVHQGPIT
TruePositive	AKA64451	1498	1505	5.91e-06	-5.22841	AGMQGPYS
TruePositive	AKA64452	1498	1505	5.91e-06	-5.22841	AGMQGPYS
TruePositive	CAA74807	1499	1506	6.1e-06	-5.21467	AGYQGPYT
TruePositive	AIA21703	1499	1506	6.1e-06	-5.21467	AGYQGPYT
TruePositive	NP_758520	1499	1506	6.1e-06	-5.21467	AGYQGPYT
TruePositive	ADW78250	1499	1506	6.1e-06	-5.21467	AGYQGPYT
TruePositive	AEE01039	1500	1507	6.1e-06	-5.21467	AGYQGPYT
TruePositive	AFQ55916	1500	1507	6.1e-06	-5.21467	AGYQGPYT
TruePositive	AMD82094	1500	1507	6.1e-06	-5.21467	AGYQGPYT
TruePositive	AVJ35777	1502	1509	6.1e-06	-5.21467	AGYQGPYT
TruePositive	YP_009353025	1503	1510	6.1e-06	-5.21467	AGYQGPYT
TruePositive	AFK66746	1503	1510	6.1e-06	-5.21467	AGYQGPYT
TruePositive	ANV28267	1122	1129	6.48e-06	-5.18842	VMHQGDSW
TruePositive	ANV28266	1122	1129	6.48e-06	-5.18842	VMHQGDSW
TruePositive	ANV28262	1124	1131	6.48e-06	-5.18842	VMHQGDSW
TruePositive	AVK51671	1415	1422	6.48e-06	-5.18842	ALFQGPVC
TruePositive	BAA24003	1416	1423	6.48e-06	-5.18842	ALFQGPVC
TruePositive	AAZ73345	1416	1423	6.48e-06	-5.18842	ALFQGPVC
TruePositive	NP_045756	1416	1423	6.48e-06	-5.18842	ALFQGPVC
TruePositive	AAZ73343	1416	1423	6.48e-06	-5.18842	ALFQGPVC
TruePositive	YP_009246449	548	555	6.89e-06	-5.16178	AYQQGPNP
TruePositive	ADU20413	1121	1128	7.31e-06	-5.13608	AIRQGDSW
TruePositive	ACK37369	1410	1417	7.31e-06	-5.13608	AIFQGPIN
TruePositive	ACK37426	1410	1417	7.31e-06	-5.13608	AIFQGPIN
TruePositive	CAA25246	1122	1129	7.53e-06	-5.12321	AIEQGDSW
TruePositive	AKA64452	1409	1416	7.53e-06	-5.12321	AIFQGPPE
TruePositive	AKA64451	1409	1416	7.53e-06	-5.12321	AIFQGPPE
TruePositive	ARM53611	1607	1614	7.53e-06	-5.12321	AEFQGPPT
TruePositive	CAD67522	1122	1129	7.76e-06	-5.11014	AIRQGDGW
TruePositive	ABF51191	1405	1412	7.76e-06	-5.11014	AIFQGPID
TruePositive	ABF51206	1405	1412	7.76e-06	-5.11014	AIFQGPID
TruePositive	ACK37435	1405	1412	7.76e-06	-5.11014	AIFQGPID
TruePositive	ACK37390	1406	1413	7.76e-06	-5.11014	AIFQGPID
TruePositive	ABF51190	1406	1413	7.76e-06	-5.11014	AIFQGPID
TruePositive	APT69840	1406	1413	7.76e-06	-5.11014	AIFQGPID
TruePositive	ACK37388	1408	1415	7.76e-06	-5.11014	AIFQGPID
TruePositive	APT69833	1413	1420	7.76e-06	-5.11014	AIFQGPID
TruePositive	APT69841	1413	1420	7.76e-06	-5.11014	AIFQGPID
TruePositive	APT69836	1413	1420	7.76e-06	-5.11014	AIFQGPID
TruePositive	ACT89356	1413	1420	7.76e-06	-5.11014	AIFQGPID
TruePositive	ACT89355	1413	1420	7.76e-06	-5.11014	AIFQGPID
TruePositive	APT69835	1414	1421	7.76e-06	-5.11014	AIFQGPID
TruePositive	AQX36825	1414	1421	7.76e-06	-5.11014	AIFQGPID
TruePositive	ABF51202	1417	1424	7.76e-06	-5.11014	AIFQGPID
TruePositive	ACK37412	1417	1424	7.76e-06	-5.11014	AIFQGPID
TruePositive	ABF51201	1418	1425	7.76e-06	-5.11014	AIFQGPID
TruePositive	ABF51200	1420	1427	7.76e-06	-5.11014	AIFQGPID
TruePositive	ACK37408	1420	1427	7.76e-06	-5.11014	AIFQGPID
TruePositive	ACK37403	1421	1428	7.76e-06	-5.11014	AIFQGPID
TruePositive	ACK37392	1421	1428	7.76e-06	-5.11014	AIFQGPID
TruePositive	APT69832	1422	1429	7.76e-06	-5.11014	AIFQGPID
TruePositive	ACK37406	1422	1429	7.76e-06	-5.11014	AIFQGPID
TruePositive	ACK37376	1422	1429	7.76e-06	-5.11014	AIFQGPID
TruePositive	APT69831	1422	1429	7.76e-06	-5.11014	AIFQGPID
TruePositive	ACR14890	981	988	7.99e-06	-5.09745	AHTQGPIS
TruePositive	APT69826	984	991	7.99e-06	-5.09745	AHTQGPIS
TruePositive	ABU62849	984	991	7.99e-06	-5.09745	AHTQGPIS
TruePositive	APT69824	984	991	7.99e-06	-5.09745	AHTQGPIS
TruePositive	APT69825	1075	1082	7.99e-06	-5.09745	AKRQGDSW
TruePositive	AHK24838	1075	1082	7.99e-06	-5.09745	AKRQGDSW
TruePositive	AEE01039	1411	1418	8.47e-06	-5.07212	ALFQGPPQ
TruePositive	AMD82094	1411	1418	8.47e-06	-5.07212	ALFQGPPQ
TruePositive	YP_009353025	1414	1421	8.47e-06	-5.07212	ALFQGPPQ
TruePositive	ANJ61567	1433	1440	8.47e-06	-5.07212	ALFQGPPQ
TruePositive	QEG13948	1433	1440	8.47e-06	-5.07212	ALFQGPPQ
TruePositive	QEG13941	1433	1440	8.47e-06	-5.07212	ALFQGPPQ
TruePositive	BAW35377	1433	1440	8.47e-06	-5.07212	ALFQGPPQ
TruePositive	QEG13930	1433	1440	8.47e-06	-5.07212	ALFQGPPQ
TruePositive	ANJ61556	1433	1440	8.47e-06	-5.07212	ALFQGPPQ
TruePositive	QEG13928	1433	1440	8.47e-06	-5.07212	ALFQGPPQ
TruePositive	QEG13922	1433	1440	8.47e-06	-5.07212	ALFQGPPQ
TruePositive	QEG13932	1433	1440	8.47e-06	-5.07212	ALFQGPPQ
TruePositive	ANJ61729	1433	1440	8.47e-06	-5.07212	ALFQGPPQ
TruePositive	BAW35375	1433	1440	8.47e-06	-5.07212	ALFQGPPQ
TruePositive	QEG13945	1433	1440	8.47e-06	-5.07212	ALFQGPPQ
TruePositive	ANJ61563	1433	1440	8.47e-06	-5.07212	ALFQGPPQ
TruePositive	ANJ61595	1433	1440	8.47e-06	-5.07212	ALFQGPPQ
TruePositive	ANJ61545	1433	1440	8.47e-06	-5.07212	ALFQGPPQ
TruePositive	ANJ61547	1433	1440	8.47e-06	-5.07212	ALFQGPPQ
TruePositive	ANJ61568	1433	1440	8.47e-06	-5.07212	ALFQGPPQ
TruePositive	AKU75647	1433	1440	8.47e-06	-5.07212	ALFQGPPQ
TruePositive	ANJ61542	1433	1440	8.47e-06	-5.07212	ALFQGPPQ
TruePositive	ANJ61561	1433	1440	8.47e-06	-5.07212	ALFQGPPQ
TruePositive	QEG13947	1433	1440	8.47e-06	-5.07212	ALFQGPPQ
TruePositive	AFM73548	1433	1440	8.47e-06	-5.07212	ALFQGPPQ
TruePositive	QEG13939	1433	1440	8.47e-06	-5.07212	ALFQGPPQ
TruePositive	ANJ61546	1433	1440	8.47e-06	-5.07212	ALFQGPPQ
TruePositive	AIT52325	1433	1440	8.47e-06	-5.07212	ALFQGPPQ
TruePositive	QEG13935	1433	1440	8.47e-06	-5.07212	ALFQGPPQ
TruePositive	ANJ61749	1433	1440	8.47e-06	-5.07212	ALFQGPPQ
TruePositive	QEG13921	1433	1440	8.47e-06	-5.07212	ALFQGPPQ
TruePositive	QEG13923	1433	1440	8.47e-06	-5.07212	ALFQGPPQ
TruePositive	ANJ61550	1433	1440	8.47e-06	-5.07212	ALFQGPPQ
TruePositive	BAW35374	1433	1440	8.47e-06	-5.07212	ALFQGPPQ
TruePositive	QEG13920	1433	1440	8.47e-06	-5.07212	ALFQGPPQ
TruePositive	ANJ61548	1433	1440	8.47e-06	-5.07212	ALFQGPPQ
TruePositive	ANJ61582	1433	1440	8.47e-06	-5.07212	ALFQGPPQ
TruePositive	QEG13944	1433	1440	8.47e-06	-5.07212	ALFQGPPQ
TruePositive	ANJ61590	1433	1440	8.47e-06	-5.07212	ALFQGPPQ
TruePositive	BAW35376	1433	1440	8.47e-06	-5.07212	ALFQGPPQ
TruePositive	AGC00381	1433	1440	8.47e-06	-5.07212	ALFQGPPQ
TruePositive	QEG13924	1433	1440	8.47e-06	-5.07212	ALFQGPPQ
TruePositive	QEG13934	1433	1440	8.47e-06	-5.07212	ALFQGPPQ
TruePositive	ANJ61578	1433	1440	8.47e-06	-5.07212	ALFQGPPQ
TruePositive	AKU75613	1434	1441	8.47e-06	-5.07212	ALFQGPPQ
TruePositive	BBM96399	1434	1441	8.47e-06	-5.07212	ALFQGPPQ
TruePositive	ANJ61594	1434	1441	8.47e-06	-5.07212	ALFQGPPQ
TruePositive	QCE20703	1434	1441	8.47e-06	-5.07212	ALFQGPPQ
TruePositive	ALP31106	1434	1441	8.47e-06	-5.07212	ALFQGPPQ
TruePositive	QCE20701	1434	1441	8.47e-06	-5.07212	ALFQGPPQ
TruePositive	QEG13957	1434	1441	8.47e-06	-5.07212	ALFQGPPQ
TruePositive	QEG13927	1434	1441	8.47e-06	-5.07212	ALFQGPPQ
TruePositive	APU51952	1434	1441	8.47e-06	-5.07212	ALFQGPPQ
TruePositive	QCE20702	1434	1441	8.47e-06	-5.07212	ALFQGPPQ
TruePositive	ALP31100	1434	1441	8.47e-06	-5.07212	ALFQGPPQ
TruePositive	ANN46856	1434	1441	8.47e-06	-5.07212	ALFQGPPQ
TruePositive	ALP31097	1434	1441	8.47e-06	-5.07212	ALFQGPPQ
TruePositive	ALJ53630	1434	1441	8.47e-06	-5.07212	ALFQGPPQ
TruePositive	AKT07950	1434	1441	8.47e-06	-5.07212	ALFQGPPQ
TruePositive	QEG14007	1434	1441	8.47e-06	-5.07212	ALFQGPPQ
TruePositive	ALP31160	1434	1441	8.47e-06	-5.07212	ALFQGPPQ
TruePositive	ANJ61554	1434	1441	8.47e-06	-5.07212	ALFQGPPQ
TruePositive	AKU75646	1434	1441	8.47e-06	-5.07212	ALFQGPPQ
TruePositive	ANJ61566	1434	1441	8.47e-06	-5.07212	ALFQGPPQ
TruePositive	BAK08578	1434	1441	8.47e-06	-5.07212	ALFQGPPQ
TruePositive	ALP31157	1434	1441	8.47e-06	-5.07212	ALFQGPPQ
TruePositive	ALP31146	1434	1441	8.47e-06	-5.07212	ALFQGPPQ
TruePositive	ALP31119	1434	1441	8.47e-06	-5.07212	ALFQGPPQ
TruePositive	QCE20695	1434	1441	8.47e-06	-5.07212	ALFQGPPQ
TruePositive	QEG13984	1434	1441	8.47e-06	-5.07212	ALFQGPPQ
TruePositive	ANJ61565	1434	1441	8.47e-06	-5.07212	ALFQGPPQ
TruePositive	AKU75594	1434	1441	8.47e-06	-5.07212	ALFQGPPQ
TruePositive	QEG13942	1434	1441	8.47e-06	-5.07212	ALFQGPPQ
TruePositive	AWW21300	1434	1441	8.47e-06	-5.07212	ALFQGPPQ
TruePositive	BAW35418	1434	1441	8.47e-06	-5.07212	ALFQGPPQ
TruePositive	QBA90621	1434	1441	8.47e-06	-5.07212	ALFQGPPQ
TruePositive	QEJ82279	1434	1441	8.47e-06	-5.07212	ALFQGPPQ
TruePositive	QEJ82275	1434	1441	8.47e-06	-5.07212	ALFQGPPQ
TruePositive	ANN46839	1434	1441	8.47e-06	-5.07212	ALFQGPPQ
TruePositive	ALP31101	1434	1441	8.47e-06	-5.07212	ALFQGPPQ
TruePositive	ANJ61722	1434	1441	8.47e-06	-5.07212	ALFQGPPQ
TruePositive	ANJ61723	1434	1441	8.47e-06	-5.07212	ALFQGPPQ
TruePositive	QEJ82278	1434	1441	8.47e-06	-5.07212	ALFQGPPQ
TruePositive	ALP31088	1434	1441	8.47e-06	-5.07212	ALFQGPPQ
TruePositive	ANN46853	1434	1441	8.47e-06	-5.07212	ALFQGPPQ
TruePositive	ANJ61551	1434	1441	8.47e-06	-5.07212	ALFQGPPQ
TruePositive	QEG13925	1434	1441	8.47e-06	-5.07212	ALFQGPPQ
TruePositive	QEG13976	1434	1441	8.47e-06	-5.07212	ALFQGPPQ
TruePositive	ANJ61719	1434	1441	8.47e-06	-5.07212	ALFQGPPQ
TruePositive	AIT52326	1434	1441	8.47e-06	-5.07212	ALFQGPPQ
TruePositive	ALP31178	1434	1441	8.47e-06	-5.07212	ALFQGPPQ
TruePositive	QEG13940	1434	1441	8.47e-06	-5.07212	ALFQGPPQ
TruePositive	AKU75641	1434	1441	8.47e-06	-5.07212	ALFQGPPQ
TruePositive	AOV86534	1434	1441	8.47e-06	-5.07212	ALFQGPPQ
TruePositive	AOF41443	1434	1441	8.47e-06	-5.07212	ALFQGPPQ
TruePositive	ANN46860	1434	1441	8.47e-06	-5.07212	ALFQGPPQ
TruePositive	QEG13969	1434	1441	8.47e-06	-5.07212	ALFQGPPQ
TruePositive	QEG13958	1434	1441	8.47e-06	-5.07212	ALFQGPPQ
TruePositive	ANJ61589	1434	1441	8.47e-06	-5.07212	ALFQGPPQ
TruePositive	ALP31158	1434	1441	8.47e-06	-5.07212	ALFQGPPQ
TruePositive	ALP31103	1434	1441	8.47e-06	-5.07212	ALFQGPPQ
TruePositive	AWW21301	1434	1441	8.47e-06	-5.07212	ALFQGPPQ
TruePositive	ANJ61737	1434	1441	8.47e-06	-5.07212	ALFQGPPQ
TruePositive	QEG13967	1434	1441	8.47e-06	-5.07212	ALFQGPPQ
TruePositive	ANJ61727	1434	1441	8.47e-06	-5.07212	ALFQGPPQ
TruePositive	ALP31142	1434	1441	8.47e-06	-5.07212	ALFQGPPQ
TruePositive	ALP31140	1434	1441	8.47e-06	-5.07212	ALFQGPPQ
TruePositive	QEG13956	1434	1441	8.47e-06	-5.07212	ALFQGPPQ
TruePositive	ALP31094	1434	1441	8.47e-06	-5.07212	ALFQGPPQ
TruePositive	QEG13991	1434	1441	8.47e-06	-5.07212	ALFQGPPQ
TruePositive	QEG13929	1434	1441	8.47e-06	-5.07212	ALFQGPPQ
TruePositive	ANJ61560	1434	1441	8.47e-06	-5.07212	ALFQGPPQ
TruePositive	AOV86542	1434	1441	8.47e-06	-5.07212	ALFQGPPQ
TruePositive	AWW21302	1434	1441	8.47e-06	-5.07212	ALFQGPPQ
TruePositive	AKU75621	1434	1441	8.47e-06	-5.07212	ALFQGPPQ
TruePositive	ANJ61592	1434	1441	8.47e-06	-5.07212	ALFQGPPQ
TruePositive	ALP31175	1434	1441	8.47e-06	-5.07212	ALFQGPPQ
TruePositive	APU51949	1434	1441	8.47e-06	-5.07212	ALFQGPPQ
TruePositive	ALP31117	1434	1441	8.47e-06	-5.07212	ALFQGPPQ
TruePositive	AKT08836	1434	1441	8.47e-06	-5.07212	ALFQGPPQ
TruePositive	ANN46849	1434	1441	8.47e-06	-5.07212	ALFQGPPQ
TruePositive	ALP31179	1434	1441	8.47e-06	-5.07212	ALFQGPPQ
TruePositive	ANE37233	1434	1441	8.47e-06	-5.07212	ALFQGPPQ
TruePositive	AOF41445	1434	1441	8.47e-06	-5.07212	ALFQGPPQ
TruePositive	AOV86541	1434	1441	8.47e-06	-5.07212	ALFQGPPQ
TruePositive	APU51957	1434	1441	8.47e-06	-5.07212	ALFQGPPQ
TruePositive	ANN46828	1434	1441	8.47e-06	-5.07212	ALFQGPPQ
TruePositive	QCE20691	1434	1441	8.47e-06	-5.07212	ALFQGPPQ
TruePositive	QBA90620	1434	1441	8.47e-06	-5.07212	ALFQGPPQ
TruePositive	AKU75616	1434	1441	8.47e-06	-5.07212	ALFQGPPQ
TruePositive	ANJ61559	1434	1441	8.47e-06	-5.07212	ALFQGPPQ
TruePositive	QEG13937	1434	1441	8.47e-06	-5.07212	ALFQGPPQ
TruePositive	QEJ82277	1434	1441	8.47e-06	-5.07212	ALFQGPPQ
TruePositive	QCE20700	1434	1441	8.47e-06	-5.07212	ALFQGPPQ
TruePositive	ANN46835	1434	1441	8.47e-06	-5.07212	ALFQGPPQ
TruePositive	QCE20706	1434	1441	8.47e-06	-5.07212	ALFQGPPQ
TruePositive	ANJ61744	1434	1441	8.47e-06	-5.07212	ALFQGPPQ
TruePositive	AKU75601	1434	1441	8.47e-06	-5.07212	ALFQGPPQ
TruePositive	ALP31180	1434	1441	8.47e-06	-5.07212	ALFQGPPQ
TruePositive	AWW21303	1434	1441	8.47e-06	-5.07212	ALFQGPPQ
TruePositive	AOF41451	1434	1441	8.47e-06	-5.07212	ALFQGPPQ
TruePositive	AKU75634	1434	1441	8.47e-06	-5.07212	ALFQGPPQ
TruePositive	ALP31170	1434	1441	8.47e-06	-5.07212	ALFQGPPQ
TruePositive	ALP31126	1434	1441	8.47e-06	-5.07212	ALFQGPPQ
TruePositive	ALP31082	1434	1441	8.47e-06	-5.07212	ALFQGPPQ
TruePositive	ANZ79244	1434	1441	8.47e-06	-5.07212	ALFQGPPQ
TruePositive	QEG13951	1434	1441	8.47e-06	-5.07212	ALFQGPPQ
TruePositive	ALP31143	1434	1441	8.47e-06	-5.07212	ALFQGPPQ
TruePositive	QEG13943	1434	1441	8.47e-06	-5.07212	ALFQGPPQ
TruePositive	QEG13975	1434	1441	8.47e-06	-5.07212	ALFQGPPQ
TruePositive	ALP31132	1434	1441	8.47e-06	-5.07212	ALFQGPPQ
TruePositive	AWW21311	1434	1441	8.47e-06	-5.07212	ALFQGPPQ
TruePositive	QEJ82281	1434	1441	8.47e-06	-5.07212	ALFQGPPQ
TruePositive	ALP31168	1434	1441	8.47e-06	-5.07212	ALFQGPPQ
TruePositive	ALP31149	1434	1441	8.47e-06	-5.07212	ALFQGPPQ
TruePositive	ALP31087	1434	1441	8.47e-06	-5.07212	ALFQGPPQ
TruePositive	AOF41448	1434	1441	8.47e-06	-5.07212	ALFQGPPQ
TruePositive	QEU45794	1434	1441	8.47e-06	-5.07212	ALFQGPPQ
TruePositive	AJI76568	1434	1441	8.47e-06	-5.07212	ALFQGPPQ
TruePositive	ANQ69419	1434	1441	8.47e-06	-5.07212	ALFQGPPQ
TruePositive	ALP31125	1434	1441	8.47e-06	-5.07212	ALFQGPPQ
TruePositive	APU51947	1434	1441	8.47e-06	-5.07212	ALFQGPPQ
TruePositive	ANZ79242	1434	1441	8.47e-06	-5.07212	ALFQGPPQ
TruePositive	AOF41452	1434	1441	8.47e-06	-5.07212	ALFQGPPQ
TruePositive	ANJ61584	1434	1441	8.47e-06	-5.07212	ALFQGPPQ
TruePositive	ANN46831	1434	1441	8.47e-06	-5.07212	ALFQGPPQ
TruePositive	AKU75624	1434	1441	8.47e-06	-5.07212	ALFQGPPQ
TruePositive	ANN46843	1434	1441	8.47e-06	-5.07212	ALFQGPPQ
TruePositive	QEG13962	1434	1441	8.47e-06	-5.07212	ALFQGPPQ
TruePositive	AJI76559	1434	1441	8.47e-06	-5.07212	ALFQGPPQ
TruePositive	ANJ61544	1434	1441	8.47e-06	-5.07212	ALFQGPPQ
TruePositive	ANN46859	1434	1441	8.47e-06	-5.07212	ALFQGPPQ
TruePositive	AWW21306	1434	1441	8.47e-06	-5.07212	ALFQGPPQ
TruePositive	ALP31166	1434	1441	8.47e-06	-5.07212	ALFQGPPQ
TruePositive	ANJ61588	1434	1441	8.47e-06	-5.07212	ALFQGPPQ
TruePositive	AKU75645	1434	1441	8.47e-06	-5.07212	ALFQGPPQ
TruePositive	ANN46829	1434	1441	8.47e-06	-5.07212	ALFQGPPQ
TruePositive	AKU75628	1434	1441	8.47e-06	-5.07212	ALFQGPPQ
TruePositive	QCE20692	1434	1441	8.47e-06	-5.07212	ALFQGPPQ
TruePositive	ANJ61581	1434	1441	8.47e-06	-5.07212	ALFQGPPQ
TruePositive	ALP31141	1434	1441	8.47e-06	-5.07212	ALFQGPPQ
TruePositive	ALP31163	1434	1441	8.47e-06	-5.07212	ALFQGPPQ
TruePositive	ALP31148	1434	1441	8.47e-06	-5.07212	ALFQGPPQ
TruePositive	ALP31098	1434	1441	8.47e-06	-5.07212	ALFQGPPQ
TruePositive	ANJ61543	1434	1441	8.47e-06	-5.07212	ALFQGPPQ
TruePositive	ANJ61572	1434	1441	8.47e-06	-5.07212	ALFQGPPQ
TruePositive	ALP31145	1434	1441	8.47e-06	-5.07212	ALFQGPPQ
TruePositive	AKU75608	1434	1441	8.47e-06	-5.07212	ALFQGPPQ
TruePositive	ANE37236	1434	1441	8.47e-06	-5.07212	ALFQGPPQ
TruePositive	AJI76555	1434	1441	8.47e-06	-5.07212	ALFQGPPQ
TruePositive	AVW85864	1434	1441	8.47e-06	-5.07212	ALFQGPPQ
TruePositive	QEJ82274	1434	1441	8.47e-06	-5.07212	ALFQGPPQ
TruePositive	AKU75599	1434	1441	8.47e-06	-5.07212	ALFQGPPQ
TruePositive	ALP31105	1434	1441	8.47e-06	-5.07212	ALFQGPPQ
TruePositive	ALP31116	1434	1441	8.47e-06	-5.07212	ALFQGPPQ
TruePositive	ALP31110	1434	1441	8.47e-06	-5.07212	ALFQGPPQ
TruePositive	AAR98503	1434	1441	8.47e-06	-5.07212	ALFQGPPQ
TruePositive	ANQ69417	1434	1441	8.47e-06	-5.07212	ALFQGPPQ
TruePositive	AYW17097	1434	1441	8.47e-06	-5.07212	ALFQGPPQ
TruePositive	AOV86539	1434	1441	8.47e-06	-5.07212	ALFQGPPQ
TruePositive	ALJ53629	1434	1441	8.47e-06	-5.07212	ALFQGPPQ
TruePositive	ANN46834	1434	1441	8.47e-06	-5.07212	ALFQGPPQ
TruePositive	AKT08833	1434	1441	8.47e-06	-5.07212	ALFQGPPQ
TruePositive	ANJ61730	1434	1441	8.47e-06	-5.07212	ALFQGPPQ
TruePositive	QEG13983	1434	1441	8.47e-06	-5.07212	ALFQGPPQ
TruePositive	AWW21304	1434	1441	8.47e-06	-5.07212	ALFQGPPQ
TruePositive	AKU75607	1434	1441	8.47e-06	-5.07212	ALFQGPPQ
TruePositive	AYW17094	1434	1441	8.47e-06	-5.07212	ALFQGPPQ
TruePositive	ALP31122	1434	1441	8.47e-06	-5.07212	ALFQGPPQ
TruePositive	ANJ61739	1434	1441	8.47e-06	-5.07212	ALFQGPPQ
TruePositive	AKU75625	1434	1441	8.47e-06	-5.07212	ALFQGPPQ
TruePositive	QEG13986	1434	1441	8.47e-06	-5.07212	ALFQGPPQ
TruePositive	QEG13989	1434	1441	8.47e-06	-5.07212	ALFQGPPQ
TruePositive	ANJ61555	1434	1441	8.47e-06	-5.07212	ALFQGPPQ
TruePositive	QEG13979	1434	1441	8.47e-06	-5.07212	ALFQGPPQ
TruePositive	AKU75630	1434	1441	8.47e-06	-5.07212	ALFQGPPQ
TruePositive	ANJ61562	1434	1441	8.47e-06	-5.07212	ALFQGPPQ
TruePositive	ANJ61601	1434	1441	8.47e-06	-5.07212	ALFQGPPQ
TruePositive	ANN46826	1434	1441	8.47e-06	-5.07212	ALFQGPPQ
TruePositive	ANN46851	1434	1441	8.47e-06	-5.07212	ALFQGPPQ
TruePositive	AKU75592	1434	1441	8.47e-06	-5.07212	ALFQGPPQ
TruePositive	ANJ61564	1434	1441	8.47e-06	-5.07212	ALFQGPPQ
TruePositive	ALP31121	1434	1441	8.47e-06	-5.07212	ALFQGPPQ
TruePositive	AKT08827	1434	1441	8.47e-06	-5.07212	ALFQGPPQ
TruePositive	QEG13926	1434	1441	8.47e-06	-5.07212	ALFQGPPQ
TruePositive	AWW21298	1434	1441	8.47e-06	-5.07212	ALFQGPPQ
TruePositive	QEG13949	1434	1441	8.47e-06	-5.07212	ALFQGPPQ
TruePositive	ANJ61587	1434	1441	8.47e-06	-5.07212	ALFQGPPQ
TruePositive	ALP31090	1434	1441	8.47e-06	-5.07212	ALFQGPPQ
TruePositive	QEG13970	1434	1441	8.47e-06	-5.07212	ALFQGPPQ
TruePositive	ALP31153	1434	1441	8.47e-06	-5.07212	ALFQGPPQ
TruePositive	ANN46836	1434	1441	8.47e-06	-5.07212	ALFQGPPQ
TruePositive	APU51953	1434	1441	8.47e-06	-5.07212	ALFQGPPQ
TruePositive	ANJ61738	1434	1441	8.47e-06	-5.07212	ALFQGPPQ
TruePositive	ANJ61571	1434	1441	8.47e-06	-5.07212	ALFQGPPQ
TruePositive	ALP31127	1434	1441	8.47e-06	-5.07212	ALFQGPPQ
TruePositive	QEG13980	1434	1441	8.47e-06	-5.07212	ALFQGPPQ
TruePositive	ANN46832	1434	1441	8.47e-06	-5.07212	ALFQGPPQ
TruePositive	ANJ61593	1434	1441	8.47e-06	-5.07212	ALFQGPPQ
TruePositive	QEG13961	1434	1441	8.47e-06	-5.07212	ALFQGPPQ
TruePositive	ANQ69420	1434	1441	8.47e-06	-5.07212	ALFQGPPQ
TruePositive	ANJ61731	1434	1441	8.47e-06	-5.07212	ALFQGPPQ
TruePositive	ANJ61735	1434	1441	8.47e-06	-5.07212	ALFQGPPQ
TruePositive	QEG13953	1434	1441	8.47e-06	-5.07212	ALFQGPPQ
TruePositive	ALP31124	1434	1441	8.47e-06	-5.07212	ALFQGPPQ
TruePositive	ALP31173	1434	1441	8.47e-06	-5.07212	ALFQGPPQ
TruePositive	ANJ61576	1434	1441	8.47e-06	-5.07212	ALFQGPPQ
TruePositive	ANN46846	1434	1441	8.47e-06	-5.07212	ALFQGPPQ
TruePositive	ANJ61591	1434	1441	8.47e-06	-5.07212	ALFQGPPQ
TruePositive	ALP31114	1434	1441	8.47e-06	-5.07212	ALFQGPPQ
TruePositive	ALP31151	1434	1441	8.47e-06	-5.07212	ALFQGPPQ
TruePositive	ANJ61585	1434	1441	8.47e-06	-5.07212	ALFQGPPQ
TruePositive	QEJ82282	1434	1441	8.47e-06	-5.07212	ALFQGPPQ
TruePositive	AKU75632	1434	1441	8.47e-06	-5.07212	ALFQGPPQ
TruePositive	ALG02131	1434	1441	8.47e-06	-5.07212	ALFQGPPQ
TruePositive	ANN46827	1434	1441	8.47e-06	-5.07212	ALFQGPPQ
TruePositive	AVW85865	1434	1441	8.47e-06	-5.07212	ALFQGPPQ
TruePositive	AKU75605	1434	1441	8.47e-06	-5.07212	ALFQGPPQ
TruePositive	ALP31112	1434	1441	8.47e-06	-5.07212	ALFQGPPQ
TruePositive	ANN46840	1434	1441	8.47e-06	-5.07212	ALFQGPPQ
TruePositive	ANJ61747	1434	1441	8.47e-06	-5.07212	ALFQGPPQ
TruePositive	QEU45799	1434	1441	8.47e-06	-5.07212	ALFQGPPQ
TruePositive	AKU75640	1434	1441	8.47e-06	-5.07212	ALFQGPPQ
TruePositive	AKU75623	1434	1441	8.47e-06	-5.07212	ALFQGPPQ
TruePositive	QEU45796	1434	1441	8.47e-06	-5.07212	ALFQGPPQ
TruePositive	AOF41447	1434	1441	8.47e-06	-5.07212	ALFQGPPQ
TruePositive	AKU75635	1434	1441	8.47e-06	-5.07212	ALFQGPPQ
TruePositive	ALP31129	1434	1441	8.47e-06	-5.07212	ALFQGPPQ
TruePositive	QCE20698	1434	1441	8.47e-06	-5.07212	ALFQGPPQ
TruePositive	ALP31162	1434	1441	8.47e-06	-5.07212	ALFQGPPQ
TruePositive	AKU75639	1434	1441	8.47e-06	-5.07212	ALFQGPPQ
TruePositive	ANN46847	1434	1441	8.47e-06	-5.07212	ALFQGPPQ
TruePositive	AKQ44188	1434	1441	8.47e-06	-5.07212	ALFQGPPQ
TruePositive	ALP31118	1434	1441	8.47e-06	-5.07212	ALFQGPPQ
TruePositive	QEG13974	1434	1441	8.47e-06	-5.07212	ALFQGPPQ
TruePositive	AKU75595	1434	1441	8.47e-06	-5.07212	ALFQGPPQ
TruePositive	AKU75611	1434	1441	8.47e-06	-5.07212	ALFQGPPQ
TruePositive	ANJ61539	1434	1441	8.47e-06	-5.07212	ALFQGPPQ
TruePositive	ALP31137	1434	1441	8.47e-06	-5.07212	ALFQGPPQ
TruePositive	AWW21309	1434	1441	8.47e-06	-5.07212	ALFQGPPQ
TruePositive	AYW17089	1434	1441	8.47e-06	-5.07212	ALFQGPPQ
TruePositive	ANN46854	1434	1441	8.47e-06	-5.07212	ALFQGPPQ
TruePositive	ANN46837	1434	1441	8.47e-06	-5.07212	ALFQGPPQ
TruePositive	AKT08834	1434	1441	8.47e-06	-5.07212	ALFQGPPQ
TruePositive	ALP31174	1434	1441	8.47e-06	-5.07212	ALFQGPPQ
TruePositive	ANJ61599	1434	1441	8.47e-06	-5.07212	ALFQGPPQ
TruePositive	ANN46833	1434	1441	8.47e-06	-5.07212	ALFQGPPQ
TruePositive	AKU75638	1434	1441	8.47e-06	-5.07212	ALFQGPPQ
TruePositive	AKU75636	1434	1441	8.47e-06	-5.07212	ALFQGPPQ
TruePositive	YP_009505605	1434	1441	8.47e-06	-5.07212	ALFQGPPQ
TruePositive	ALP31144	1434	1441	8.47e-06	-5.07212	ALFQGPPQ
TruePositive	AOF41444	1434	1441	8.47e-06	-5.07212	ALFQGPPQ
TruePositive	ANJ61724	1434	1441	8.47e-06	-5.07212	ALFQGPPQ
TruePositive	AKQ44196	1434	1441	8.47e-06	-5.07212	ALFQGPPQ
TruePositive	APP91863	1434	1441	8.47e-06	-5.07212	ALFQGPPQ
TruePositive	QCE20696	1434	1441	8.47e-06	-5.07212	ALFQGPPQ
TruePositive	ANJ61552	1434	1441	8.47e-06	-5.07212	ALFQGPPQ
TruePositive	APU51948	1434	1441	8.47e-06	-5.07212	ALFQGPPQ
TruePositive	ALP31123	1434	1441	8.47e-06	-5.07212	ALFQGPPQ
TruePositive	APU51951	1434	1441	8.47e-06	-5.07212	ALFQGPPQ
TruePositive	AWW21305	1434	1441	8.47e-06	-5.07212	ALFQGPPQ
TruePositive	AKU75626	1434	1441	8.47e-06	-5.07212	ALFQGPPQ
TruePositive	APU51946	1434	1441	8.47e-06	-5.07212	ALFQGPPQ
TruePositive	ANN46852	1434	1441	8.47e-06	-5.07212	ALFQGPPQ
TruePositive	AZL41614	1434	1441	8.47e-06	-5.07212	ALFQGPPQ
TruePositive	QCE20690	1434	1441	8.47e-06	-5.07212	ALFQGPPQ
TruePositive	ANQ69416	1434	1441	8.47e-06	-5.07212	ALFQGPPQ
TruePositive	ANN46838	1434	1441	8.47e-06	-5.07212	ALFQGPPQ
TruePositive	QCE20694	1434	1441	8.47e-06	-5.07212	ALFQGPPQ
TruePositive	ANJ61575	1434	1441	8.47e-06	-5.07212	ALFQGPPQ
TruePositive	AKU75596	1434	1441	8.47e-06	-5.07212	ALFQGPPQ
TruePositive	QEG13988	1434	1441	8.47e-06	-5.07212	ALFQGPPQ
TruePositive	QEG13971	1434	1441	8.47e-06	-5.07212	ALFQGPPQ
TruePositive	ALP31133	1434	1441	8.47e-06	-5.07212	ALFQGPPQ
TruePositive	AKQ44195	1434	1441	8.47e-06	-5.07212	ALFQGPPQ
TruePositive	ANJ61750	1434	1441	8.47e-06	-5.07212	ALFQGPPQ
TruePositive	AKU75617	1434	1441	8.47e-06	-5.07212	ALFQGPPQ
TruePositive	ALP31171	1434	1441	8.47e-06	-5.07212	ALFQGPPQ
TruePositive	ANN46850	1434	1441	8.47e-06	-5.07212	ALFQGPPQ
TruePositive	ANJ61541	1434	1441	8.47e-06	-5.07212	ALFQGPPQ
TruePositive	QEJ82271	1434	1441	8.47e-06	-5.07212	ALFQGPPQ
TruePositive	ANE37235	1434	1441	8.47e-06	-5.07212	ALFQGPPQ
TruePositive	AKQ44189	1434	1441	8.47e-06	-5.07212	ALFQGPPQ
TruePositive	QEG13965	1434	1441	8.47e-06	-5.07212	ALFQGPPQ
TruePositive	ALP31169	1434	1441	8.47e-06	-5.07212	ALFQGPPQ
TruePositive	ALP31131	1434	1441	8.47e-06	-5.07212	ALFQGPPQ
TruePositive	AKU75618	1434	1441	8.47e-06	-5.07212	ALFQGPPQ
TruePositive	ALP31085	1434	1441	8.47e-06	-5.07212	ALFQGPPQ
TruePositive	AKU75615	1434	1441	8.47e-06	-5.07212	ALFQGPPQ
TruePositive	ALP31152	1434	1441	8.47e-06	-5.07212	ALFQGPPQ
TruePositive	ALP31176	1434	1441	8.47e-06	-5.07212	ALFQGPPQ
TruePositive	AKU75597	1434	1441	8.47e-06	-5.07212	ALFQGPPQ
TruePositive	APP91862	1434	1441	8.47e-06	-5.07212	ALFQGPPQ
TruePositive	ANJ61720	1434	1441	8.47e-06	-5.07212	ALFQGPPQ
TruePositive	ANJ61721	1434	1441	8.47e-06	-5.07212	ALFQGPPQ
TruePositive	ALP31091	1434	1441	8.47e-06	-5.07212	ALFQGPPQ
TruePositive	ALP31111	1434	1441	8.47e-06	-5.07212	ALFQGPPQ
TruePositive	AOF41449	1434	1441	8.47e-06	-5.07212	ALFQGPPQ
TruePositive	AKU75612	1434	1441	8.47e-06	-5.07212	ALFQGPPQ
TruePositive	BBM96400	1434	1441	8.47e-06	-5.07212	ALFQGPPQ
TruePositive	AOV86540	1434	1441	8.47e-06	-5.07212	ALFQGPPQ
TruePositive	QEG13938	1434	1441	8.47e-06	-5.07212	ALFQGPPQ
TruePositive	ALP31165	1434	1441	8.47e-06	-5.07212	ALFQGPPQ
TruePositive	ANJ61557	1434	1441	8.47e-06	-5.07212	ALFQGPPQ
TruePositive	ANJ61569	1434	1441	8.47e-06	-5.07212	ALFQGPPQ
TruePositive	ALP31083	1434	1441	8.47e-06	-5.07212	ALFQGPPQ
TruePositive	AYW17092	1434	1441	8.47e-06	-5.07212	ALFQGPPQ
TruePositive	EV68polyprotein	1434	1441	8.47e-06	-5.07212	ALFQGPPQ
TruePositive	ANE37234	1434	1441	8.47e-06	-5.07212	ALFQGPPQ
TruePositive	AKQ44190	1434	1441	8.47e-06	-5.07212	ALFQGPPQ
TruePositive	AOV86535	1434	1441	8.47e-06	-5.07212	ALFQGPPQ
TruePositive	ALP31161	1434	1441	8.47e-06	-5.07212	ALFQGPPQ
TruePositive	ALP31159	1434	1441	8.47e-06	-5.07212	ALFQGPPQ
TruePositive	ALP31164	1434	1441	8.47e-06	-5.07212	ALFQGPPQ
TruePositive	AJI76564	1434	1441	8.47e-06	-5.07212	ALFQGPPQ
TruePositive	AOV86538	1434	1441	8.47e-06	-5.07212	ALFQGPPQ
TruePositive	QEG13933	1434	1441	8.47e-06	-5.07212	ALFQGPPQ
TruePositive	APU51956	1434	1441	8.47e-06	-5.07212	ALFQGPPQ
TruePositive	ANJ61726	1434	1441	8.47e-06	-5.07212	ALFQGPPQ
TruePositive	BAW35415	1434	1441	8.47e-06	-5.07212	ALFQGPPQ
TruePositive	QEG13964	1434	1441	8.47e-06	-5.07212	ALFQGPPQ
TruePositive	ALP31107	1434	1441	8.47e-06	-5.07212	ALFQGPPQ
TruePositive	ANJ61570	1434	1441	8.47e-06	-5.07212	ALFQGPPQ
TruePositive	QEU45797	1434	1441	8.47e-06	-5.07212	ALFQGPPQ
TruePositive	QEG13994	1434	1441	8.47e-06	-5.07212	ALFQGPPQ
TruePositive	ANN46858	1434	1441	8.47e-06	-5.07212	ALFQGPPQ
TruePositive	ANJ61579	1434	1441	8.47e-06	-5.07212	ALFQGPPQ
TruePositive	QCE20693	1434	1441	8.47e-06	-5.07212	ALFQGPPQ
TruePositive	AKU75604	1434	1441	8.47e-06	-5.07212	ALFQGPPQ
TruePositive	ANJ61746	1434	1441	8.47e-06	-5.07212	ALFQGPPQ
TruePositive	AWW18929	1434	1441	8.47e-06	-5.07212	ALFQGPPQ
TruePositive	ANJ61580	1434	1441	8.47e-06	-5.07212	ALFQGPPQ
TruePositive	ANJ61751	1434	1441	8.47e-06	-5.07212	ALFQGPPQ
TruePositive	ALP31102	1434	1441	8.47e-06	-5.07212	ALFQGPPQ
TruePositive	BAK08577	1434	1441	8.47e-06	-5.07212	ALFQGPPQ
TruePositive	QEG13954	1434	1441	8.47e-06	-5.07212	ALFQGPPQ
TruePositive	QEJ82276	1434	1441	8.47e-06	-5.07212	ALFQGPPQ
TruePositive	ALP31147	1434	1441	8.47e-06	-5.07212	ALFQGPPQ
TruePositive	AKU75644	1434	1441	8.47e-06	-5.07212	ALFQGPPQ
TruePositive	APU51950	1434	1441	8.47e-06	-5.07212	ALFQGPPQ
TruePositive	ANN46855	1434	1441	8.47e-06	-5.07212	ALFQGPPQ
TruePositive	QEG13977	1434	1441	8.47e-06	-5.07212	ALFQGPPQ
TruePositive	AKU75600	1434	1441	8.47e-06	-5.07212	ALFQGPPQ
TruePositive	ALP31086	1434	1441	8.47e-06	-5.07212	ALFQGPPQ
TruePositive	QEG13966	1434	1441	8.47e-06	-5.07212	ALFQGPPQ
TruePositive	ALP31138	1434	1441	8.47e-06	-5.07212	ALFQGPPQ
TruePositive	AKU75610	1434	1441	8.47e-06	-5.07212	ALFQGPPQ
TruePositive	ALP31113	1434	1441	8.47e-06	-5.07212	ALFQGPPQ
TruePositive	AKU75629	1434	1441	8.47e-06	-5.07212	ALFQGPPQ
TruePositive	AKU75606	1434	1441	8.47e-06	-5.07212	ALFQGPPQ
TruePositive	ANJ61740	1434	1441	8.47e-06	-5.07212	ALFQGPPQ
TruePositive	ANJ61745	1434	1441	8.47e-06	-5.07212	ALFQGPPQ
TruePositive	ALP31115	1434	1441	8.47e-06	-5.07212	ALFQGPPQ
TruePositive	AZL49233	1434	1441	8.47e-06	-5.07212	ALFQGPPQ
TruePositive	ABL61317	1434	1441	8.47e-06	-5.07212	ALFQGPPQ
TruePositive	QBA90622	1434	1441	8.47e-06	-5.07212	ALFQGPPQ
TruePositive	ANJ61558	1434	1441	8.47e-06	-5.07212	ALFQGPPQ
TruePositive	AKU75622	1434	1441	8.47e-06	-5.07212	ALFQGPPQ
TruePositive	ALP31081	1434	1441	8.47e-06	-5.07212	ALFQGPPQ
TruePositive	QEG13955	1434	1441	8.47e-06	-5.07212	ALFQGPPQ
TruePositive	QCE20704	1434	1441	8.47e-06	-5.07212	ALFQGPPQ
TruePositive	AKU75642	1434	1441	8.47e-06	-5.07212	ALFQGPPQ
TruePositive	ANJ61596	1434	1441	8.47e-06	-5.07212	ALFQGPPQ
TruePositive	AMB37294	1434	1441	8.47e-06	-5.07212	ALFQGPPQ
TruePositive	AKU75614	1434	1441	8.47e-06	-5.07212	ALFQGPPQ
TruePositive	AOV86536	1434	1441	8.47e-06	-5.07212	ALFQGPPQ
TruePositive	QCE20634	1434	1441	8.47e-06	-5.07212	ALFQGPPQ
TruePositive	BAW35416	1434	1441	8.47e-06	-5.07212	ALFQGPPQ
TruePositive	QEG13950	1434	1441	8.47e-06	-5.07212	ALFQGPPQ
TruePositive	ALP31156	1434	1441	8.47e-06	-5.07212	ALFQGPPQ
TruePositive	ALP31108	1434	1441	8.47e-06	-5.07212	ALFQGPPQ
TruePositive	QEG13973	1434	1441	8.47e-06	-5.07212	ALFQGPPQ
TruePositive	BAW35420	1434	1441	8.47e-06	-5.07212	ALFQGPPQ
TruePositive	ANJ61597	1434	1441	8.47e-06	-5.07212	ALFQGPPQ
TruePositive	QEG13992	1434	1441	8.47e-06	-5.07212	ALFQGPPQ
TruePositive	ALP31128	1434	1441	8.47e-06	-5.07212	ALFQGPPQ
TruePositive	ANN46848	1434	1441	8.47e-06	-5.07212	ALFQGPPQ
TruePositive	BAW35421	1434	1441	8.47e-06	-5.07212	ALFQGPPQ
TruePositive	ALP31177	1434	1441	8.47e-06	-5.07212	ALFQGPPQ
TruePositive	AKU75609	1434	1441	8.47e-06	-5.07212	ALFQGPPQ
TruePositive	ANJ61598	1434	1441	8.47e-06	-5.07212	ALFQGPPQ
TruePositive	AWW21308	1434	1441	8.47e-06	-5.07212	ALFQGPPQ
TruePositive	ALP31089	1434	1441	8.47e-06	-5.07212	ALFQGPPQ
TruePositive	ANN46845	1434	1441	8.47e-06	-5.07212	ALFQGPPQ
TruePositive	AJI76571	1434	1441	8.47e-06	-5.07212	ALFQGPPQ
TruePositive	ALP31135	1434	1441	8.47e-06	-5.07212	ALFQGPPQ
TruePositive	AYW17093	1434	1441	8.47e-06	-5.07212	ALFQGPPQ
TruePositive	QEU45798	1434	1441	8.47e-06	-5.07212	ALFQGPPQ
TruePositive	AKU75593	1434	1441	8.47e-06	-5.07212	ALFQGPPQ
TruePositive	ANJ61586	1434	1441	8.47e-06	-5.07212	ALFQGPPQ
TruePositive	AKU75591	1434	1441	8.47e-06	-5.07212	ALFQGPPQ
TruePositive	AYW17090	1434	1441	8.47e-06	-5.07212	ALFQGPPQ
TruePositive	AWW21312	1434	1441	8.47e-06	-5.07212	ALFQGPPQ
TruePositive	ALP31109	1434	1441	8.47e-06	-5.07212	ALFQGPPQ
TruePositive	ANJ61577	1434	1441	8.47e-06	-5.07212	ALFQGPPQ
TruePositive	ANJ61574	1434	1441	8.47e-06	-5.07212	ALFQGPPQ
TruePositive	QEG13959	1434	1441	8.47e-06	-5.07212	ALFQGPPQ
TruePositive	ANN46841	1434	1441	8.47e-06	-5.07212	ALFQGPPQ
TruePositive	QEG13987	1434	1441	8.47e-06	-5.07212	ALFQGPPQ
TruePositive	ALP31154	1434	1441	8.47e-06	-5.07212	ALFQGPPQ
TruePositive	ANJ61742	1434	1441	8.47e-06	-5.07212	ALFQGPPQ
TruePositive	ANJ61600	1434	1441	8.47e-06	-5.07212	ALFQGPPQ
TruePositive	AWW21307	1434	1441	8.47e-06	-5.07212	ALFQGPPQ
TruePositive	ANJ61553	1434	1441	8.47e-06	-5.07212	ALFQGPPQ
TruePositive	AKU75598	1434	1441	8.47e-06	-5.07212	ALFQGPPQ
TruePositive	AJI76570	1434	1441	8.47e-06	-5.07212	ALFQGPPQ
TruePositive	ANZ79243	1434	1441	8.47e-06	-5.07212	ALFQGPPQ
TruePositive	AKU75631	1434	1441	8.47e-06	-5.07212	ALFQGPPQ
TruePositive	ANJ61743	1434	1441	8.47e-06	-5.07212	ALFQGPPQ
TruePositive	ALP31130	1434	1441	8.47e-06	-5.07212	ALFQGPPQ
TruePositive	ANQ69418	1434	1441	8.47e-06	-5.07212	ALFQGPPQ
TruePositive	ANJ61733	1434	1441	8.47e-06	-5.07212	ALFQGPPQ
TruePositive	ANN46830	1434	1441	8.47e-06	-5.07212	ALFQGPPQ
TruePositive	AOF41446	1434	1441	8.47e-06	-5.07212	ALFQGPPQ
TruePositive	ANJ61741	1434	1441	8.47e-06	-5.07212	ALFQGPPQ
TruePositive	ANN46842	1434	1441	8.47e-06	-5.07212	ALFQGPPQ
TruePositive	AOF41450	1434	1441	8.47e-06	-5.07212	ALFQGPPQ
TruePositive	AKQ44192	1434	1441	8.47e-06	-5.07212	ALFQGPPQ
TruePositive	ALP31095	1434	1441	8.47e-06	-5.07212	ALFQGPPQ
TruePositive	BAW35417	1434	1441	8.47e-06	-5.07212	ALFQGPPQ
TruePositive	ANJ61736	1434	1441	8.47e-06	-5.07212	ALFQGPPQ
TruePositive	AKU75637	1434	1441	8.47e-06	-5.07212	ALFQGPPQ
TruePositive	AKU75603	1434	1441	8.47e-06	-5.07212	ALFQGPPQ
TruePositive	ALP31120	1434	1441	8.47e-06	-5.07212	ALFQGPPQ
TruePositive	QEG13931	1434	1441	8.47e-06	-5.07212	ALFQGPPQ
TruePositive	AKU75602	1434	1441	8.47e-06	-5.07212	ALFQGPPQ
TruePositive	QCE20705	1434	1441	8.47e-06	-5.07212	ALFQGPPQ
TruePositive	ANJ61728	1434	1441	8.47e-06	-5.07212	ALFQGPPQ
TruePositive	AOV86537	1434	1441	8.47e-06	-5.07212	ALFQGPPQ
TruePositive	ANJ61540	1434	1441	8.47e-06	-5.07212	ALFQGPPQ
TruePositive	ALP31134	1434	1441	8.47e-06	-5.07212	ALFQGPPQ
TruePositive	ALP31136	1434	1441	8.47e-06	-5.07212	ALFQGPPQ
TruePositive	QEG13963	1434	1441	8.47e-06	-5.07212	ALFQGPPQ
TruePositive	ANJ61549	1434	1441	8.47e-06	-5.07212	ALFQGPPQ
TruePositive	ALP31172	1434	1441	8.47e-06	-5.07212	ALFQGPPQ
TruePositive	ANJ61748	1434	1441	8.47e-06	-5.07212	ALFQGPPQ
TruePositive	ANN46861	1434	1441	8.47e-06	-5.07212	ALFQGPPQ
TruePositive	ALP31096	1434	1441	8.47e-06	-5.07212	ALFQGPPQ
TruePositive	ALP31155	1434	1441	8.47e-06	-5.07212	ALFQGPPQ
TruePositive	ALP31093	1434	1441	8.47e-06	-5.07212	ALFQGPPQ
TruePositive	ALP31167	1434	1441	8.47e-06	-5.07212	ALFQGPPQ
TruePositive	QEJ82273	1434	1441	8.47e-06	-5.07212	ALFQGPPQ
TruePositive	AKU75633	1434	1441	8.47e-06	-5.07212	ALFQGPPQ
TruePositive	AWW21310	1434	1441	8.47e-06	-5.07212	ALFQGPPQ
TruePositive	ANQ44597	1434	1441	8.47e-06	-5.07212	ALFQGPPQ
TruePositive	ANJ61725	1434	1441	8.47e-06	-5.07212	ALFQGPPQ
TruePositive	ANJ61573	1434	1441	8.47e-06	-5.07212	ALFQGPPQ
TruePositive	QEG13946	1434	1441	8.47e-06	-5.07212	ALFQGPPQ
TruePositive	ALP31150	1434	1441	8.47e-06	-5.07212	ALFQGPPQ
TruePositive	ALP31084	1434	1441	8.47e-06	-5.07212	ALFQGPPQ
TruePositive	AOF41442	1434	1441	8.47e-06	-5.07212	ALFQGPPQ
TruePositive	APU51955	1434	1441	8.47e-06	-5.07212	ALFQGPPQ
TruePositive	ALP31104	1434	1441	8.47e-06	-5.07212	ALFQGPPQ
TruePositive	AJI76561	1434	1441	8.47e-06	-5.07212	ALFQGPPQ
TruePositive	ANJ61583	1434	1441	8.47e-06	-5.07212	ALFQGPPQ
TruePositive	AKU75619	1434	1441	8.47e-06	-5.07212	ALFQGPPQ
TruePositive	AKQ44191	1434	1441	8.47e-06	-5.07212	ALFQGPPQ
TruePositive	ANN46844	1434	1441	8.47e-06	-5.07212	ALFQGPPQ
TruePositive	AKU75643	1434	1441	8.47e-06	-5.07212	ALFQGPPQ
TruePositive	BAW35419	1434	1441	8.47e-06	-5.07212	ALFQGPPQ
TruePositive	AKU75627	1434	1441	8.47e-06	-5.07212	ALFQGPPQ
TruePositive	AWW21299	1434	1441	8.47e-06	-5.07212	ALFQGPPQ
TruePositive	ANJ61718	1434	1441	8.47e-06	-5.07212	ALFQGPPQ
TruePositive	QEG13936	1434	1441	8.47e-06	-5.07212	ALFQGPPQ
TruePositive	QEU45795	1434	1441	8.47e-06	-5.07212	ALFQGPPQ
TruePositive	AIZ48771	1434	1441	8.47e-06	-5.07212	ALFQGPPQ
TruePositive	ANJ61734	1434	1441	8.47e-06	-5.07212	ALFQGPPQ
TruePositive	QEJ82284	1434	1441	8.47e-06	-5.07212	ALFQGPPQ
TruePositive	QCE20697	1434	1441	8.47e-06	-5.07212	ALFQGPPQ
TruePositive	QEJ82283	1434	1441	8.47e-06	-5.07212	ALFQGPPQ
TruePositive	ALP31139	1434	1441	8.47e-06	-5.07212	ALFQGPPQ
TruePositive	ANJ61732	1434	1441	8.47e-06	-5.07212	ALFQGPPQ
TruePositive	QCE20699	1434	1441	8.47e-06	-5.07212	ALFQGPPQ
TruePositive	APU51954	1434	1441	8.47e-06	-5.07212	ALFQGPPQ
TruePositive	APU51945	1434	1441	8.47e-06	-5.07212	ALFQGPPQ
TruePositive	ALP31092	1434	1441	8.47e-06	-5.07212	ALFQGPPQ
TruePositive	ALP31099	1434	1441	8.47e-06	-5.07212	ALFQGPPQ
TruePositive	QEJ82272	1434	1441	8.47e-06	-5.07212	ALFQGPPQ
TruePositive	QEG13985	1434	1441	8.47e-06	-5.07212	ALFQGPPQ
TruePositive	AYW17095	1435	1442	8.47e-06	-5.07212	ALFQGPPQ
TruePositive	AYW17091	1435	1442	8.47e-06	-5.07212	ALFQGPPQ
TruePositive	AWW21317	1435	1442	8.47e-06	-5.07212	ALFQGPPQ
TruePositive	AWW21314	1435	1442	8.47e-06	-5.07212	ALFQGPPQ
TruePositive	AYW17088	1435	1442	8.47e-06	-5.07212	ALFQGPPQ
TruePositive	AKQ44193	1435	1442	8.47e-06	-5.07212	ALFQGPPQ
TruePositive	AYW17096	1435	1442	8.47e-06	-5.07212	ALFQGPPQ
TruePositive	AKT08835	1435	1442	8.47e-06	-5.07212	ALFQGPPQ
TruePositive	ALT66861	1435	1442	8.47e-06	-5.07212	ALFQGPPQ
TruePositive	AKT08826	1435	1442	8.47e-06	-5.07212	ALFQGPPQ
TruePositive	AYW17098	1435	1442	8.47e-06	-5.07212	ALFQGPPQ
TruePositive	AWW21320	1435	1442	8.47e-06	-5.07212	ALFQGPPQ
TruePositive	AYW17087	1435	1442	8.47e-06	-5.07212	ALFQGPPQ
TruePositive	AWW21321	1435	1442	8.47e-06	-5.07212	ALFQGPPQ
TruePositive	AKQ44194	1435	1442	8.47e-06	-5.07212	ALFQGPPQ
TruePositive	AWW21315	1435	1442	8.47e-06	-5.07212	ALFQGPPQ
TruePositive	AIA24394	1435	1442	8.47e-06	-5.07212	ALFQGPPQ
TruePositive	AWW21313	1435	1442	8.47e-06	-5.07212	ALFQGPPQ
TruePositive	AWW21316	1435	1442	8.47e-06	-5.07212	ALFQGPPQ
TruePositive	AYW17085	1435	1442	8.47e-06	-5.07212	ALFQGPPQ
TruePositive	AWW21319	1435	1442	8.47e-06	-5.07212	ALFQGPPQ
TruePositive	AIS73057	1435	1442	8.47e-06	-5.07212	ALFQGPPQ
TruePositive	AWW21318	1435	1442	8.47e-06	-5.07212	ALFQGPPQ
TruePositive	AYW17086	1435	1442	8.47e-06	-5.07212	ALFQGPPQ
TruePositive	ANG56888	1435	1442	8.47e-06	-5.07212	ALFQGPPQ
TruePositive	ABK88241	1436	1443	8.47e-06	-5.07212	ALFQGPPQ
TruePositive	ABL61316	1436	1443	8.47e-06	-5.07212	ALFQGPPQ
TruePositive	ABV25904	1436	1443	8.47e-06	-5.07212	ALFQGPPQ
TruePositive	AFR77805	1437	1444	8.47e-06	-5.07212	ALFQGPPQ
TruePositive	BAD95475	1438	1445	8.47e-06	-5.07212	ALFQGPPQ
TruePositive	AFR77804	1438	1445	8.47e-06	-5.07212	ALFQGPPQ
TruePositive	AAW30684	1438	1445	8.47e-06	-5.07212	ALFQGPPQ
TruePositive	AFR77803	1438	1445	8.47e-06	-5.07212	ALFQGPPQ
TruePositive	AAV41051	1438	1445	8.47e-06	-5.07212	ALFQGPPQ
TruePositive	AAW30685	1440	1447	8.47e-06	-5.07212	ALFQGPPQ
TruePositive	AGA12643	1451	1458	8.47e-06	-5.07212	ALFQGPPQ
TruePositive	ABM54521	1454	1461	8.47e-06	-5.07212	ALFQGPPQ
TruePositive	AKU75591	1104	1111	8.72e-06	-5.05948	APRQGESW
TruePositive	ACX85862	1121	1128	8.72e-06	-5.05948	AIKQGDSW
TruePositive	AUD09275	1121	1128	8.72e-06	-5.05948	AIKQGDSW
TruePositive	AMN38451	1121	1128	8.72e-06	-5.05948	AIKQGDSW
TruePositive	ACX85867	1121	1128	8.72e-06	-5.05948	AIKQGDSW
TruePositive	ADA84545	1121	1128	8.72e-06	-5.05948	AIKQGDSW
TruePositive	AUD09264	1121	1128	8.72e-06	-5.05948	AIKQGDSW
TruePositive	AUD09266	1121	1128	8.72e-06	-5.05948	AIKQGDSW
TruePositive	AAO59382	1121	1128	8.72e-06	-5.05948	AIKQGDSW
TruePositive	ACX85865	1121	1128	8.72e-06	-5.05948	AIKQGDSW
TruePositive	AUD09279	1121	1128	8.72e-06	-5.05948	AIKQGDSW
TruePositive	ACX85869	1121	1128	8.72e-06	-5.05948	AIKQGDSW
TruePositive	ACX85860	1121	1128	8.72e-06	-5.05948	AIKQGDSW
TruePositive	ACX85866	1121	1128	8.72e-06	-5.05948	AIKQGDSW
TruePositive	ACX85864	1121	1128	8.72e-06	-5.05948	AIKQGDSW
TruePositive	ACX85868	1121	1128	8.72e-06	-5.05948	AIKQGDSW
TruePositive	ACX85861	1121	1128	8.72e-06	-5.05948	AIKQGDSW
TruePositive	ACS34686	1121	1128	8.72e-06	-5.05948	AIKQGDSW
TruePositive	ACX85863	1121	1128	8.72e-06	-5.05948	AIKQGDSW
TruePositive	AUD09260	1122	1129	8.72e-06	-5.05948	AIKQGDSW
TruePositive	ACD78142	1122	1129	8.72e-06	-5.05948	AIKQGDSW
TruePositive	AUD09244	1122	1129	8.72e-06	-5.05948	AIKQGDSW
TruePositive	AGA12372	1122	1129	8.72e-06	-5.05948	AIKQGDSW
TruePositive	AGA12368	1122	1129	8.72e-06	-5.05948	AIKQGDSW
TruePositive	ANV28269	1122	1129	8.72e-06	-5.05948	AIKQGDSW
TruePositive	AUD09287	1122	1129	8.72e-06	-5.05948	AIKQGDSW
TruePositive	AIB00524	1122	1129	8.72e-06	-5.05948	AIKQGDSW
TruePositive	AGA12757	1122	1129	8.72e-06	-5.05948	AIKQGDSW
TruePositive	AGA12359	1122	1129	8.72e-06	-5.05948	AIKQGDSW
TruePositive	ACD78148	1122	1129	8.72e-06	-5.05948	AIKQGDSW
TruePositive	ANV28270	1122	1129	8.72e-06	-5.05948	AIKQGDSW
TruePositive	AUD09255	1122	1129	8.72e-06	-5.05948	AIKQGDSW
TruePositive	AGA12729	1122	1129	8.72e-06	-5.05948	AIKQGDSW
TruePositive	AGA12448	1122	1129	8.72e-06	-5.05948	AIKQGDSW
TruePositive	AUD09269	1122	1129	8.72e-06	-5.05948	AIKQGDSW
TruePositive	ABV00568	1122	1129	8.72e-06	-5.05948	AIKQGDSW
TruePositive	ACS34684	1122	1129	8.72e-06	-5.05948	AIKQGDSW
TruePositive	AUD09261	1122	1129	8.72e-06	-5.05948	AIKQGDSW
TruePositive	AIA58174	1122	1129	8.72e-06	-5.05948	AIKQGDSW
TruePositive	AIA58173	1122	1129	8.72e-06	-5.05948	AIKQGDSW
TruePositive	ACS34682	1122	1129	8.72e-06	-5.05948	AIKQGDSW
TruePositive	AAN85443	1122	1129	8.72e-06	-5.05948	AIKQGDSW
TruePositive	ABK20866	1122	1129	8.72e-06	-5.05948	AIKQGDSW
TruePositive	AIA58175	1122	1129	8.72e-06	-5.05948	AIKQGDSW
TruePositive	AIB00530	1122	1129	8.72e-06	-5.05948	AIKQGDSW
TruePositive	AAP37264	1122	1129	8.72e-06	-5.05948	AIKQGDSW
TruePositive	ADR82078	1122	1129	8.72e-06	-5.05948	AIKQGDSW
TruePositive	ACD78141	1122	1129	8.72e-06	-5.05948	AIKQGDSW
TruePositive	AIB00518	1122	1129	8.72e-06	-5.05948	AIKQGDSW
TruePositive	ANV28260	1122	1129	8.72e-06	-5.05948	AIKQGDSW
TruePositive	AKC92706	1122	1129	8.72e-06	-5.05948	AIKQGDSW
TruePositive	AIB00516	1122	1129	8.72e-06	-5.05948	AIKQGDSW
TruePositive	AIA58177	1122	1129	8.72e-06	-5.05948	AIKQGDSW
TruePositive	AUD09284	1122	1129	8.72e-06	-5.05948	AIKQGDSW
TruePositive	AUD09226	1122	1129	8.72e-06	-5.05948	AIKQGDSW
TruePositive	AUD09289	1122	1129	8.72e-06	-5.05948	AIKQGDSW
TruePositive	AUD09250	1122	1129	8.72e-06	-5.05948	AIKQGDSW
TruePositive	AIB00515	1122	1129	8.72e-06	-5.05948	AIKQGDSW
TruePositive	AAP37262	1122	1129	8.72e-06	-5.05948	AIKQGDSW
TruePositive	ABK20867	1122	1129	8.72e-06	-5.05948	AIKQGDSW
TruePositive	ADR82079	1122	1129	8.72e-06	-5.05948	AIKQGDSW
TruePositive	ACD78147	1122	1129	8.72e-06	-5.05948	AIKQGDSW
TruePositive	AUD09288	1122	1129	8.72e-06	-5.05948	AIKQGDSW
TruePositive	AGA12361	1122	1129	8.72e-06	-5.05948	AIKQGDSW
TruePositive	ABV00567	1122	1129	8.72e-06	-5.05948	AIKQGDSW
TruePositive	AIB00514	1122	1129	8.72e-06	-5.05948	AIKQGDSW
TruePositive	ACD78140	1122	1129	8.72e-06	-5.05948	AIKQGDSW
TruePositive	ABV00573	1122	1129	8.72e-06	-5.05948	AIKQGDSW
TruePositive	ACD78138	1122	1129	8.72e-06	-5.05948	AIKQGDSW
TruePositive	AGA12539	1122	1129	8.72e-06	-5.05948	AIKQGDSW
TruePositive	ABV00569	1122	1129	8.72e-06	-5.05948	AIKQGDSW
TruePositive	AIB00523	1122	1129	8.72e-06	-5.05948	AIKQGDSW
TruePositive	ACD78144	1122	1129	8.72e-06	-5.05948	AIKQGDSW
TruePositive	AUD09253	1122	1129	8.72e-06	-5.05948	AIKQGDSW
TruePositive	ACD78133	1122	1129	8.72e-06	-5.05948	AIKQGDSW
TruePositive	AIB00528	1122	1129	8.72e-06	-5.05948	AIKQGDSW
TruePositive	AGA12643	1122	1129	8.72e-06	-5.05948	AIKQGDSW
TruePositive	AIB00507	1122	1129	8.72e-06	-5.05948	AIKQGDSW
TruePositive	AIB00531	1122	1129	8.72e-06	-5.05948	AIKQGDSW
TruePositive	AUD09282	1122	1129	8.72e-06	-5.05948	AIKQGDSW
TruePositive	ADR82077	1122	1129	8.72e-06	-5.05948	AIKQGDSW
TruePositive	AIB00525	1122	1129	8.72e-06	-5.05948	AIKQGDSW
TruePositive	ACS34683	1122	1129	8.72e-06	-5.05948	AIKQGDSW
TruePositive	AIB00509	1122	1129	8.72e-06	-5.05948	AIKQGDSW
TruePositive	AUD09263	1122	1129	8.72e-06	-5.05948	AIKQGDSW
TruePositive	AUD09232	1122	1129	8.72e-06	-5.05948	AIKQGDSW
TruePositive	AIB00527	1122	1129	8.72e-06	-5.05948	AIKQGDSW
TruePositive	AIB00511	1122	1129	8.72e-06	-5.05948	AIKQGDSW
TruePositive	AUD09278	1122	1129	8.72e-06	-5.05948	AIKQGDSW
TruePositive	AIB00529	1122	1129	8.72e-06	-5.05948	AIKQGDSW
TruePositive	ABV00571	1122	1129	8.72e-06	-5.05948	AIKQGDSW
TruePositive	ABK20865	1122	1129	8.72e-06	-5.05948	AIKQGDSW
TruePositive	AUD09262	1122	1129	8.72e-06	-5.05948	AIKQGDSW
TruePositive	ACD78143	1122	1129	8.72e-06	-5.05948	AIKQGDSW
TruePositive	AAO45820	1122	1129	8.72e-06	-5.05948	AIKQGDSW
TruePositive	AUD09238	1122	1129	8.72e-06	-5.05948	AIKQGDSW
TruePositive	AUD09267	1122	1129	8.72e-06	-5.05948	AIKQGDSW
TruePositive	AHF48784	1122	1129	8.72e-06	-5.05948	AIKQGDSW
TruePositive	ACD78146	1122	1129	8.72e-06	-5.05948	AIKQGDSW
TruePositive	AGA12376	1122	1129	8.72e-06	-5.05948	AIKQGDSW
TruePositive	AUD09233	1122	1129	8.72e-06	-5.05948	AIKQGDSW
TruePositive	AUD09252	1122	1129	8.72e-06	-5.05948	AIKQGDSW
TruePositive	AUD09273	1122	1129	8.72e-06	-5.05948	AIKQGDSW
TruePositive	AIA58176	1122	1129	8.72e-06	-5.05948	AIKQGDSW
TruePositive	ADR82076	1122	1129	8.72e-06	-5.05948	AIKQGDSW
TruePositive	AUD09257	1122	1129	8.72e-06	-5.05948	AIKQGDSW
TruePositive	ALI31818	1122	1129	8.72e-06	-5.05948	AIKQGDSW
TruePositive	AUD09248	1122	1129	8.72e-06	-5.05948	AIKQGDSW
TruePositive	ACN78837	1122	1129	8.72e-06	-5.05948	AIKQGDSW
TruePositive	AGA12462	1122	1129	8.72e-06	-5.05948	AIKQGDSW
TruePositive	AUD09271	1122	1129	8.72e-06	-5.05948	AIKQGDSW
TruePositive	ACX53673	1122	1129	8.72e-06	-5.05948	AIKQGDSW
TruePositive	ALI31819	1122	1129	8.72e-06	-5.05948	AIKQGDSW
TruePositive	AGA12358	1122	1129	8.72e-06	-5.05948	AIKQGDSW
TruePositive	AIT71004	1122	1129	8.72e-06	-5.05948	AIKQGDSW
TruePositive	AUD09254	1122	1129	8.72e-06	-5.05948	AIKQGDSW
TruePositive	AGA12364	1122	1129	8.72e-06	-5.05948	AIKQGDSW
TruePositive	AAL75969	1124	1131	8.72e-06	-5.05948	AIKQGDSW
TruePositive	ALI31817	1124	1131	8.72e-06	-5.05948	AIKQGDSW
TruePositive	AAX23603	1124	1131	8.72e-06	-5.05948	AIKQGDSW
TruePositive	AUD09270	1124	1131	8.72e-06	-5.05948	AIKQGDSW
TruePositive	AAL75970	1124	1131	8.72e-06	-5.05948	AIKQGDSW
TruePositive	AUD09277	1124	1131	8.72e-06	-5.05948	AIKQGDSW
TruePositive	AUD09227	1124	1131	8.72e-06	-5.05948	AIKQGDSW
TruePositive	ACZ05037	1124	1131	8.72e-06	-5.05948	AIKQGDSW
TruePositive	AAX23605	1124	1131	8.72e-06	-5.05948	AIKQGDSW
TruePositive	ACZ05038	1124	1131	8.72e-06	-5.05948	AIKQGDSW
TruePositive	AUD09235	1124	1131	8.72e-06	-5.05948	AIKQGDSW
TruePositive	AAX23604	1124	1131	8.72e-06	-5.05948	AIKQGDSW
TruePositive	AAQ10897	1124	1131	8.72e-06	-5.05948	AIKQGDSW
TruePositive	ACZ05039	1124	1131	8.72e-06	-5.05948	AIKQGDSW
TruePositive	AAQ10894	1124	1131	8.72e-06	-5.05948	AIKQGDSW
TruePositive	AAX23606	1124	1131	8.72e-06	-5.05948	AIKQGDSW
TruePositive	ACZ05035	1124	1131	8.72e-06	-5.05948	AIKQGDSW
TruePositive	AAX23607	1124	1131	8.72e-06	-5.05948	AIKQGDSW
TruePositive	AUD09236	1124	1131	8.72e-06	-5.05948	AIKQGDSW
TruePositive	ACZ05034	1124	1131	8.72e-06	-5.05948	AIKQGDSW
TruePositive	ACZ05040	1124	1131	8.72e-06	-5.05948	AIKQGDSW
TruePositive	AUD09234	1124	1131	8.72e-06	-5.05948	AIKQGDSW
TruePositive	AAF05693	1415	1422	8.98e-06	-5.04672	ALFQGPAC
TruePositive	AUF49662	1105	1112	9.25e-06	-5.03386	AQKQGASW
TruePositive	AFD32987	1107	1114	9.25e-06	-5.03386	AQKQGATW
TruePositive	AAR38845	1107	1114	9.25e-06	-5.03386	AQKQGATW
TruePositive	ACO89621	1108	1115	9.25e-06	-5.03386	AQKQGASW
TruePositive	ARD27152	1108	1115	9.25e-06	-5.03386	AQKQGASW
TruePositive	AIW62941	1116	1123	9.25e-06	-5.03386	AQKQGASW
TruePositive	AJO60892	1116	1123	9.25e-06	-5.03386	AQKQGASW
TruePositive	AOS88560	1116	1123	9.25e-06	-5.03386	AQKQGASW
TruePositive	CAJ01904	1122	1129	9.25e-06	-5.03386	AIKQGDGW
TruePositive	ACN78836	1122	1129	9.25e-06	-5.03386	AIKQGDGW
TruePositive	ABV00575	1122	1129	9.25e-06	-5.03386	AIKQGDGW
TruePositive	ACD78135	1122	1129	9.25e-06	-5.03386	AIKQGDGW
TruePositive	CAJ01901	1122	1129	9.25e-06	-5.03386	AIKQGDGW
TruePositive	ACD78139	1122	1129	9.25e-06	-5.03386	AIKQGDGW
TruePositive	CAJ01903	1122	1129	9.25e-06	-5.03386	AIKQGDGW
TruePositive	CAJ01902	1122	1129	9.25e-06	-5.03386	AIKQGDGW
TruePositive	CAJ01900	1122	1129	9.25e-06	-5.03386	AIKQGDGW
TruePositive	ACZ05036	1124	1131	9.25e-06	-5.03386	AIKQGDGW
TruePositive	ASZ70601	1075	1082	9.51e-06	-5.02182	AKKQGDSW
TruePositive	AUD08530	1107	1114	9.51e-06	-5.02182	AERQGDGW
TruePositive	AUD08546	1107	1114	9.51e-06	-5.02182	AERQGDGW
TruePositive	AUD08529	1107	1114	9.51e-06	-5.02182	AERQGDGW
TruePositive	AUD08545	1107	1114	9.51e-06	-5.02182	AERQGDGW
TruePositive	AUD08547	1107	1114	9.51e-06	-5.02182	AERQGDGW
TruePositive	ACK37374	1409	1416	9.51e-06	-5.02182	AIFQGPIT
TruePositive	ACK37423	1409	1416	9.51e-06	-5.02182	AIFQGPIT
TruePositive	ABO69372	1410	1417	9.51e-06	-5.02182	AIFQGPIT
TruePositive	ABF51193	1410	1417	9.51e-06	-5.02182	AIFQGPIT
TruePositive	ACK37381	1410	1417	9.51e-06	-5.02182	AIFQGPIT
TruePositive	ACK37446	1410	1417	9.51e-06	-5.02182	AIFQGPIT
TruePositive	ACK37379	1411	1418	9.51e-06	-5.02182	AIFQGPIT
TruePositive	ABF51203	1411	1418	9.51e-06	-5.02182	AIFQGPIT
TruePositive	ACK37416	1411	1418	9.51e-06	-5.02182	AIFQGPIT
TruePositive	APT69838	1411	1418	9.51e-06	-5.02182	AIFQGPIT
TruePositive	ACK37401	1412	1419	9.51e-06	-5.02182	AIFQGPIT
TruePositive	ACK37389	1413	1420	9.51e-06	-5.02182	AIFQGPIT
TruePositive	ACK37382	1413	1420	9.51e-06	-5.02182	AIFQGPIT
TruePositive	ACK37433	1414	1421	9.51e-06	-5.02182	AIFQGPIT
TruePositive	APT69812	1414	1421	9.51e-06	-5.02182	AIFQGPIT
TruePositive	ACK37387	1414	1421	9.51e-06	-5.02182	AIFQGPIT
TruePositive	APT69837	1414	1421	9.51e-06	-5.02182	AIFQGPIT
TruePositive	ABF51194	1414	1421	9.51e-06	-5.02182	AIFQGPIT
TruePositive	ABF51204	1414	1421	9.51e-06	-5.02182	AIFQGPIT
TruePositive	ACK37404	1414	1421	9.51e-06	-5.02182	AIFQGPIT
TruePositive	ACK37371	1414	1421	9.51e-06	-5.02182	AIFQGPIT
TruePositive	ACK37396	1414	1421	9.51e-06	-5.02182	AIFQGPIT
TruePositive	ACK37370	1414	1421	9.51e-06	-5.02182	AIFQGPIT
TruePositive	ACK37410	1414	1421	9.51e-06	-5.02182	AIFQGPIT
TruePositive	APT69839	1414	1421	9.51e-06	-5.02182	AIFQGPIT
TruePositive	ARK08560	1414	1421	9.51e-06	-5.02182	AIFQGPIT
TruePositive	ACU00187	1414	1421	9.51e-06	-5.02182	AIFQGPIT
TruePositive	ACK37402	1414	1421	9.51e-06	-5.02182	AIFQGPIT
TruePositive	APT69834	1414	1421	9.51e-06	-5.02182	AIFQGPIT
TruePositive	APT69828	1415	1422	9.51e-06	-5.02182	AIFQGPIT
TruePositive	ABF51192	1416	1423	9.51e-06	-5.02182	AIFQGPIT
TruePositive	AGA12517	1538	1545	9.51e-06	-5.02182	AGQQGPYT
TruePositive	ANV28244	1540	1547	9.51e-06	-5.02182	AGQQGPYT
TruePositive	ANV28248	1540	1547	9.51e-06	-5.02182	AGQQGPYT
TruePositive	ANV28246	1540	1547	9.51e-06	-5.02182	AGQQGPYT
TruePositive	ANV28232	1540	1547	9.51e-06	-5.02182	AGQQGPYT
TruePositive	ANV28245	1540	1547	9.51e-06	-5.02182	AGQQGPYT
TruePositive	ABU41835	1541	1548	9.51e-06	-5.02182	AGQQGPYT
TruePositive	ABM54521	1541	1548	9.51e-06	-5.02182	AGQQGPYT
TruePositive	ABM54517	1541	1548	9.51e-06	-5.02182	AGQQGPYT
TruePositive	ABM54519	1541	1548	9.51e-06	-5.02182	AGQQGPYT
TruePositive	AGX93074	1541	1548	9.51e-06	-5.02182	AGQQGPYT
TruePositive	AIT57556	1541	1548	9.51e-06	-5.02182	AGQQGPYT
TruePositive	ABM54518	1541	1548	9.51e-06	-5.02182	AGQQGPYT
TruePositive	AEO51787	1541	1548	9.51e-06	-5.02182	AGQQGPYT
TruePositive	ABM54520	1541	1548	9.51e-06	-5.02182	AGQQGPYT
TruePositive	AIT57557	1541	1548	9.51e-06	-5.02182	AGQQGPYT
TruePositive	AGX93075	1541	1548	9.51e-06	-5.02182	AGQQGPYT
TruePositive	ABM21512	1544	1551	9.51e-06	-5.02182	AGQQGPYT
TruePositive	ABM21514	1544	1551	9.51e-06	-5.02182	AGQQGPYT
TruePositive	ABM21513	1544	1551	9.51e-06	-5.02182	AGQQGPYT
TruePositive	ABM21511	1544	1551	9.51e-06	-5.02182	AGQQGPYT
TruePositive	ABM21509	1544	1551	9.51e-06	-5.02182	AGQQGPYT
TruePositive	ABM21510	1544	1551	9.51e-06	-5.02182	AGQQGPYT
TruePositive	ABM21506	1545	1552	9.51e-06	-5.02182	AGQQGPYT
TruePositive	ABM54545	1545	1552	9.51e-06	-5.02182	AGQQGPYT
TruePositive	BAE20393	1545	1552	9.51e-06	-5.02182	AGQQGPYT
TruePositive	ABM21505	1545	1552	9.51e-06	-5.02182	AGQQGPYT
TruePositive	ABM54544	1545	1552	9.51e-06	-5.02182	AGQQGPYT
TruePositive	AGA12385	1122	1129	9.79e-06	-5.00922	ATKQGDSW
TruePositive	APW91136	1424	1431	1.01e-05	-4.99568	ALFQGPHV
TruePositive	AUF49638	1434	1441	1.01e-05	-4.99568	ALFQGPHK
TruePositive	AUN27635	1437	1444	1.01e-05	-4.99568	ALFQGPHK
TruePositive	AUN27633	1437	1444	1.01e-05	-4.99568	ALFQGPHK
TruePositive	AUN27636	1437	1444	1.01e-05	-4.99568	ALFQGPHK
TruePositive	AUN27637	1437	1444	1.01e-05	-4.99568	ALFQGPHK
TruePositive	AUN27641	1437	1444	1.01e-05	-4.99568	ALFQGPHK
TruePositive	AUN27638	1437	1444	1.01e-05	-4.99568	ALFQGPHK
TruePositive	AUN27640	1437	1444	1.01e-05	-4.99568	ALFQGPHK
TruePositive	ABC69253	1437	1444	1.01e-05	-4.99568	ALFQGPHK
TruePositive	ACK37380	1508	1515	1.01e-05	-4.99568	AQTQGPYS
TruePositive	ACK37428	1509	1516	1.01e-05	-4.99568	AQTQGPYS
TruePositive	ACK37430	1509	1516	1.01e-05	-4.99568	AQTQGPYS
TruePositive	ACK37386	1509	1516	1.01e-05	-4.99568	AQTQGPYS
TruePositive	ABF51184	1509	1516	1.01e-05	-4.99568	AQTQGPYS
TruePositive	APT69827	1509	1516	1.01e-05	-4.99568	AQTQGPYS
TruePositive	ADO24588	1509	1516	1.01e-05	-4.99568	AQTQGPYS
TruePositive	ACK37368	1509	1516	1.01e-05	-4.99568	AQTQGPYS
TruePositive	APT69843	1509	1516	1.01e-05	-4.99568	AQTQGPYS
TruePositive	ABO69378	1510	1517	1.01e-05	-4.99568	AQTQGPYS
TruePositive	ABO69379	1510	1517	1.01e-05	-4.99568	AQTQGPYS
TruePositive	APT69844	1510	1517	1.01e-05	-4.99568	AQTQGPYS
TruePositive	APT69845	1510	1517	1.01e-05	-4.99568	AQTQGPYS
TruePositive	ABF51179	1510	1517	1.01e-05	-4.99568	AQTQGPYS
TruePositive	ACK37420	1510	1517	1.01e-05	-4.99568	AQTQGPYS
TruePositive	ABO69381	1510	1517	1.01e-05	-4.99568	AQTQGPYS
TruePositive	ABO69377	1510	1517	1.01e-05	-4.99568	AQTQGPYS
TruePositive	ARA15405	1510	1517	1.01e-05	-4.99568	AQTQGPYS
TruePositive	NP_041009	1511	1518	1.01e-05	-4.99568	AQTQGPYS
TruePositive	ACK37409	1511	1518	1.01e-05	-4.99568	AQTQGPYS
TruePositive	AHK24837	1511	1518	1.01e-05	-4.99568	AQTQGPYS
TruePositive	ABF51180	1511	1518	1.01e-05	-4.99568	AQTQGPYS
TruePositive	AAA45756	1511	1518	1.01e-05	-4.99568	AQTQGPYS
TruePositive	ACK37443	1514	1521	1.01e-05	-4.99568	AQTQGPYS
TruePositive	ACK37411	1514	1521	1.01e-05	-4.99568	AQTQGPYS
TruePositive	ABF51181	1514	1521	1.01e-05	-4.99568	AQTQGPYS
TruePositive	ABO69380	1515	1522	1.01e-05	-4.99568	AQTQGPYS
TruePositive	ACK37425	1515	1522	1.01e-05	-4.99568	AQTQGPYS
TruePositive	ACK37444	1515	1522	1.01e-05	-4.99568	AQTQGPYS
TruePositive	AHK24836	1515	1522	1.01e-05	-4.99568	AQTQGPYS
TruePositive	ACK37407	1515	1522	1.01e-05	-4.99568	AQTQGPYS
TruePositive	ACK37417	1515	1522	1.01e-05	-4.99568	AQTQGPYS
TruePositive	ACK37393	1515	1522	1.01e-05	-4.99568	AQTQGPYS
TruePositive	ABF51182	1516	1523	1.01e-05	-4.99568	AQTQGPYS
TruePositive	ACK37424	1518	1525	1.01e-05	-4.99568	AQTQGPYS
TruePositive	ABO69376	1518	1525	1.01e-05	-4.99568	AQTQGPYS
TruePositive	ABF51183	1518	1525	1.01e-05	-4.99568	AQTQGPYS
TruePositive	ARO77045	1518	1525	1.01e-05	-4.99568	AQTQGPYS
TruePositive	APT69846	1518	1525	1.01e-05	-4.99568	AQTQGPYS
TruePositive	AAL69631	1432	1439	1.04e-05	-4.98297	ALFQGPIY
TruePositive	NP_653149	1443	1450	1.04e-05	-4.98297	ALFQGPIY
TruePositive	NP_653149	1443	1450	1.04e-05	-4.98297	ALFQGPIY
TruePositive	AKA64452	981	988	1.13e-05	-4.94692	AMEQGIHS
TruePositive	AKA64451	981	988	1.13e-05	-4.94692	AMEQGIHS
TruePositive	AAP37261	1122	1129	1.13e-05	-4.94692	AVKQGDSW
TruePositive	ACD78149	1122	1129	1.13e-05	-4.94692	AVKQGDSW
TruePositive	ACD78145	1122	1129	1.13e-05	-4.94692	AVKQGDSW
TruePositive	ACD78137	1122	1129	1.13e-05	-4.94692	AVKQGDSW
TruePositive	AVI00675	1692	1699	1.13e-05	-4.94692	AQAQGDIC
TruePositive	AVI00674	1692	1699	1.13e-05	-4.94692	AQAQGDIC
TruePositive	ADK22846	578	585	1.23e-05	-4.91009	AWNQGVDD
TruePositive	ABO69374	1415	1422	1.23e-05	-4.91009	AVFQGPIT
TruePositive	ACK37439	1415	1422	1.23e-05	-4.91009	AVFQGPIT
TruePositive	AFS30772	1497	1504	1.23e-05	-4.91009	ATKQGPEH
TruePositive	AJR20996	1546	1553	1.23e-05	-4.91009	AKVQGPAC
TruePositive	AGS09866	1453	1460	1.3e-05	-4.88606	ALFQGPIQ
TruePositive	AAQ03189	1453	1460	1.3e-05	-4.88606	ALFQGPIQ
TruePositive	AGS09865	1453	1460	1.3e-05	-4.88606	ALFQGPIQ
TruePositive	AHZ90552	1453	1460	1.3e-05	-4.88606	ALFQGPIQ
TruePositive	AGS09867	1453	1460	1.3e-05	-4.88606	ALFQGPIQ
TruePositive	AGS09870	1453	1460	1.3e-05	-4.88606	ALFQGPIQ
TruePositive	BAD72855	1453	1460	1.3e-05	-4.88606	ALFQGPIQ
TruePositive	BAD72854	1453	1460	1.3e-05	-4.88606	ALFQGPIQ
TruePositive	AHZ90553	1453	1460	1.3e-05	-4.88606	ALFQGPIQ
TruePositive	AAG27151	1453	1460	1.3e-05	-4.88606	ALFQGPIQ
TruePositive	BAD72856	1453	1460	1.3e-05	-4.88606	ALFQGPIQ
TruePositive	AGS09871	1453	1460	1.3e-05	-4.88606	ALFQGPIQ
TruePositive	BAD72853	1453	1460	1.3e-05	-4.88606	ALFQGPIQ
TruePositive	BAZ95883	1453	1460	1.3e-05	-4.88606	ALFQGPIQ
TruePositive	AAG27167	1453	1460	1.3e-05	-4.88606	ALFQGPIQ
TruePositive	AGX93074	1454	1461	1.3e-05	-4.88606	ALFQGPIQ
TruePositive	ABM54519	1454	1461	1.3e-05	-4.88606	ALFQGPIQ
TruePositive	ABU41835	1454	1461	1.3e-05	-4.88606	ALFQGPIQ
TruePositive	ABM54520	1454	1461	1.3e-05	-4.88606	ALFQGPIQ
TruePositive	AIT57556	1454	1461	1.3e-05	-4.88606	ALFQGPIQ
TruePositive	AGX93075	1454	1461	1.3e-05	-4.88606	ALFQGPIQ
TruePositive	AIT57557	1454	1461	1.3e-05	-4.88606	ALFQGPIQ
TruePositive	ABM54549	1458	1465	1.3e-05	-4.88606	ALFQGPIQ
TruePositive	BAM71653	1458	1465	1.3e-05	-4.88606	ALFQGPIQ
TruePositive	AIM41612	1458	1465	1.3e-05	-4.88606	ALFQGPIQ
TruePositive	AIM41611	1458	1465	1.3e-05	-4.88606	ALFQGPIQ
TruePositive	ABD97876	1458	1465	1.3e-05	-4.88606	ALFQGPIQ
TruePositive	BAM71650	1458	1465	1.3e-05	-4.88606	ALFQGPIQ
TruePositive	AEO51783	1458	1465	1.3e-05	-4.88606	ALFQGPIQ
TruePositive	AIM41610	1458	1465	1.3e-05	-4.88606	ALFQGPIQ
TruePositive	ABM54542	1458	1465	1.3e-05	-4.88606	ALFQGPIQ
TruePositive	ANC94866	1458	1465	1.3e-05	-4.88606	ALFQGPIQ
TruePositive	BAM71643	1458	1465	1.3e-05	-4.88606	ALFQGPIQ
TruePositive	ABM54543	1458	1465	1.3e-05	-4.88606	ALFQGPIQ
TruePositive	ABM54545	1458	1465	1.3e-05	-4.88606	ALFQGPIQ
TruePositive	AAW72810	1458	1465	1.3e-05	-4.88606	ALFQGPIQ
TruePositive	ABM54548	1458	1465	1.3e-05	-4.88606	ALFQGPIQ
TruePositive	AIM41613	1458	1465	1.3e-05	-4.88606	ALFQGPIQ
TruePositive	BAM71654	1458	1465	1.3e-05	-4.88606	ALFQGPIQ
TruePositive	ABM54547	1458	1465	1.3e-05	-4.88606	ALFQGPIQ
TruePositive	ABD97877	1458	1465	1.3e-05	-4.88606	ALFQGPIQ
TruePositive	AAW72811	1458	1465	1.3e-05	-4.88606	ALFQGPIQ
TruePositive	AEO78969	1458	1465	1.3e-05	-4.88606	ALFQGPIQ
TruePositive	ABM54544	1458	1465	1.3e-05	-4.88606	ALFQGPIQ
TruePositive	ANA57368	1458	1465	1.3e-05	-4.88606	ALFQGPIQ
TruePositive	AHC94940	1458	1465	1.3e-05	-4.88606	ALFQGPIQ
TruePositive	AEO78971	1458	1465	1.3e-05	-4.88606	ALFQGPIQ
TruePositive	BAM71655	1458	1465	1.3e-05	-4.88606	ALFQGPIQ
TruePositive	AEO78970	1458	1465	1.3e-05	-4.88606	ALFQGPIQ
TruePositive	ABM54546	1458	1465	1.3e-05	-4.88606	ALFQGPIQ
TruePositive	BAM71656	1458	1465	1.3e-05	-4.88606	ALFQGPIQ
TruePositive	AEO78972	1458	1465	1.3e-05	-4.88606	ALFQGPIQ
TruePositive	ANA57377	1458	1465	1.3e-05	-4.88606	ALFQGPIQ
TruePositive	AEN25585	1458	1465	1.3e-05	-4.88606	ALFQGPIQ
TruePositive	AHF72731	1462	1469	1.3e-05	-4.88606	ALFQGPIQ
TruePositive	ALL26332	1462	1469	1.3e-05	-4.88606	ALFQGPIQ
TruePositive	AAQ10895	1453	1460	1.33e-05	-4.87615	ALFQGPFQ
TruePositive	ABV60433	1540	1547	1.37e-05	-4.86328	AGHQGAYN
TruePositive	ABV60423	1540	1547	1.37e-05	-4.86328	AGHQGAYN
TruePositive	ABV60430	1540	1547	1.37e-05	-4.86328	AGHQGAYN
TruePositive	ABV60432	1540	1547	1.37e-05	-4.86328	AGHQGAYN
TruePositive	ABV60420	1540	1547	1.37e-05	-4.86328	AGHQGAYN
TruePositive	ABV60422	1540	1547	1.37e-05	-4.86328	AGHQGAYN
TruePositive	ABV60421	1540	1547	1.37e-05	-4.86328	AGHQGAYN
TruePositive	AEL31291	1496	1503	1.41e-05	-4.85078	AVKQGPEH
TruePositive	APT69825	1498	1505	1.41e-05	-4.85078	AVTQGPEH
TruePositive	ASZ70601	1498	1505	1.41e-05	-4.85078	AVTQGPEH
TruePositive	AHK24838	1498	1505	1.41e-05	-4.85078	AVTQGPEH
TruePositive	AMB19800	1499	1506	1.41e-05	-4.85078	AVKQGPEH
TruePositive	AMH87228	1500	1507	1.41e-05	-4.85078	ATVQGPEH
TruePositive	ASW23001	1500	1507	1.41e-05	-4.85078	ATVQGPEH
TruePositive	ASW23000	1500	1507	1.41e-05	-4.85078	ATVQGPEH
TruePositive	APT69823	1500	1507	1.41e-05	-4.85078	ATVQGPEH
TruePositive	APT69821	1503	1510	1.41e-05	-4.85078	AVKQGPEH
TruePositive	ACR14890	1503	1510	1.41e-05	-4.85078	AVKQGPEH
TruePositive	APT69826	1506	1513	1.41e-05	-4.85078	AVKQGPEH
TruePositive	ABU62849	1506	1513	1.41e-05	-4.85078	AVKQGPEH
TruePositive	APT69824	1506	1513	1.41e-05	-4.85078	AVKQGPEH
TruePositive	AEL31293	1086	1093	1.49e-05	-4.82681	ASKQGDSW
TruePositive	AMB19799	1086	1093	1.49e-05	-4.82681	ASKQGDSW
TruePositive	AMB19798	1493	1500	1.57e-05	-4.8041	AVIQGPEH
TruePositive	ACV51798	1494	1501	1.57e-05	-4.8041	AVIQGPEH
TruePositive	AHD24522	1496	1503	1.57e-05	-4.8041	AVIQGPEH
TruePositive	AEL31292	1496	1503	1.57e-05	-4.8041	AVIQGPEH
TruePositive	ABU62850	1496	1503	1.57e-05	-4.8041	AVIQGPEH
TruePositive	ABO76708	1497	1504	1.57e-05	-4.8041	AVIQGPEH
TruePositive	AGA18499	1537	1544	1.57e-05	-4.8041	ANFQGAYT
TruePositive	ADK22846	1537	1544	1.57e-05	-4.8041	ANFQGAYT
TruePositive	AGA18496	1537	1544	1.57e-05	-4.8041	ANFQGAYT
TruePositive	AGA18497	1537	1544	1.57e-05	-4.8041	ANFQGAYT
TruePositive	AGA18495	1537	1544	1.57e-05	-4.8041	ANFQGAYT
TruePositive	AGA18498	1537	1544	1.57e-05	-4.8041	ANFQGAYT
TruePositive	AFV92902	1537	1544	1.57e-05	-4.8041	ANFQGAYT
TruePositive	AGA18493	1537	1544	1.57e-05	-4.8041	ANFQGAYT
TruePositive	AGA18494	1537	1544	1.57e-05	-4.8041	ANFQGAYT
TruePositive	AFV92903	1537	1544	1.57e-05	-4.8041	ANFQGAYT
TruePositive	AKU89613	1537	1544	1.57e-05	-4.8041	ANFQGAYT
TruePositive	AFR46521	1537	1544	1.57e-05	-4.8041	ANFQGAYT
TruePositive	BAM10196	1537	1544	1.57e-05	-4.8041	ANFQGAYT
TruePositive	AGP75905	1538	1545	1.57e-05	-4.8041	ANFQGAYT
TruePositive	ARM53611	1696	1703	1.57e-05	-4.8041	AGTQGPYT
TruePositive	ARC95292	1722	1729	1.57e-05	-4.8041	AGTQGPYT
TruePositive	ARC95293	1722	1729	1.57e-05	-4.8041	AGTQGPYT
TruePositive	ARC95292	1410	1417	1.61e-05	-4.79317	ALFQGPPT
TruePositive	ARC95293	1410	1417	1.61e-05	-4.79317	ALFQGPPT
TruePositive	AVJ35777	1413	1420	1.61e-05	-4.79317	ALFQGPPT
TruePositive	YP_009246449	1435	1442	1.61e-05	-4.79317	ALFQGPPT
TruePositive	ABA43708	1440	1447	1.61e-05	-4.79317	ALFQGPPT
TruePositive	BAA18891	1440	1447	1.61e-05	-4.79317	ALFQGPPT
TruePositive	NP_040760	1440	1447	1.61e-05	-4.79317	ALFQGPPT
TruePositive	NP_040760	1440	1447	1.61e-05	-4.79317	ALFQGPPT
TruePositive	AUF49658	1442	1449	1.61e-05	-4.79317	ALFQGPPT
TruePositive	ACU00185	1502	1509	1.61e-05	-4.79317	ATLQGPQH
TruePositive	AJO54281	1506	1513	1.61e-05	-4.79317	ATLQGPQH
TruePositive	AEL31293	1509	1516	1.61e-05	-4.79317	ATLQGPQH
TruePositive	AMB19799	1509	1516	1.61e-05	-4.79317	ATLQGPQH
TruePositive	AVI00675	1509	1516	1.61e-05	-4.79317	ATLQGPQH
TruePositive	AVI00674	1509	1516	1.61e-05	-4.79317	ATLQGPQH
TruePositive	ARC95293	1633	1640	1.61e-05	-4.79317	ALFQGPPT
TruePositive	ARC95292	1633	1640	1.61e-05	-4.79317	ALFQGPPT
TruePositive	ARU09500	1434	1441	1.66e-05	-4.77989	ALFQGPPR
TruePositive	AKU75620	1434	1441	1.66e-05	-4.77989	ALFQGPPR
TruePositive	AFD32987	1436	1443	1.66e-05	-4.77989	ALFQGPPR
TruePositive	AHN13888	1437	1444	1.66e-05	-4.77989	ALFQGPPR
TruePositive	AEO51787	1028	1035	1.7e-05	-4.76955	AMEQGITQ
TruePositive	ACK37445	1409	1416	1.7e-05	-4.76955	AIFQGPIS
TruePositive	APT69810	1409	1416	1.7e-05	-4.76955	AIFQGPIS
TruePositive	ACK37391	1409	1416	1.7e-05	-4.76955	AIFQGPIS
TruePositive	ACK37414	1409	1416	1.7e-05	-4.76955	AIFQGPIS
TruePositive	ACK37413	1409	1416	1.7e-05	-4.76955	AIFQGPIS
TruePositive	APQ46501	1409	1416	1.7e-05	-4.76955	AIFQGPIS
TruePositive	ABF51195	1409	1416	1.7e-05	-4.76955	AIFQGPIS
TruePositive	ACK37415	1409	1416	1.7e-05	-4.76955	AIFQGPIS
TruePositive	ABO69370	1409	1416	1.7e-05	-4.76955	AIFQGPIS
TruePositive	ABF51196	1411	1418	1.7e-05	-4.76955	AIFQGPIS
TruePositive	ABF51205	1411	1418	1.7e-05	-4.76955	AIFQGPIS
TruePositive	ACK37438	1411	1418	1.7e-05	-4.76955	AIFQGPIS
TruePositive	ACK37384	1411	1418	1.7e-05	-4.76955	AIFQGPIS
TruePositive	ABO69375	1412	1419	1.7e-05	-4.76955	AIFQGPIS
TruePositive	ABF51188	1412	1419	1.7e-05	-4.76955	AIFQGPIS
TruePositive	APT69811	1412	1419	1.7e-05	-4.76955	AIFQGPIS
TruePositive	ABO69373	1412	1419	1.7e-05	-4.76955	AIFQGPIS
TruePositive	ACK37441	1412	1419	1.7e-05	-4.76955	AIFQGPIS
TruePositive	ABO69371	1412	1419	1.7e-05	-4.76955	AIFQGPIS
TruePositive	ACK37437	1412	1419	1.7e-05	-4.76955	AIFQGPIS
TruePositive	APU57649	1412	1419	1.7e-05	-4.76955	AIFQGPIS
TruePositive	ACK37378	1412	1419	1.7e-05	-4.76955	AIFQGPIS
TruePositive	AMK37996	1413	1420	1.7e-05	-4.76955	AIFQGPIS
TruePositive	AOL02449	1413	1420	1.7e-05	-4.76955	AIFQGPIS
TruePositive	AAV27300	1413	1420	1.7e-05	-4.76955	AIFQGPIS
TruePositive	ACK37367	1413	1420	1.7e-05	-4.76955	AIFQGPIS
TruePositive	AVK92956	1413	1420	1.7e-05	-4.76955	AIFQGPIS
TruePositive	APT69842	1413	1420	1.7e-05	-4.76955	AIFQGPIS
TruePositive	ATZ76015	1413	1420	1.7e-05	-4.76955	AIFQGPIS
TruePositive	ATZ76014	1413	1420	1.7e-05	-4.76955	AIFQGPIS
TruePositive	BAA00168	1413	1420	1.7e-05	-4.76955	AIFQGPIS
TruePositive	ACK37377	1413	1420	1.7e-05	-4.76955	AIFQGPIS
TruePositive	ACK37397	1413	1420	1.7e-05	-4.76955	AIFQGPIS
TruePositive	AKH49408	1413	1420	1.7e-05	-4.76955	AIFQGPIS
TruePositive	ACK37427	1413	1420	1.7e-05	-4.76955	AIFQGPIS
TruePositive	ACK37405	1414	1421	1.7e-05	-4.76955	AIFQGPIS
TruePositive	ACK37375	1414	1421	1.7e-05	-4.76955	AIFQGPIS
TruePositive	ACK37429	1414	1421	1.7e-05	-4.76955	AIFQGPIS
TruePositive	ACK37383	1414	1421	1.7e-05	-4.76955	AIFQGPIS
TruePositive	ACK37394	1414	1421	1.7e-05	-4.76955	AIFQGPIS
TruePositive	ACK37395	1414	1421	1.7e-05	-4.76955	AIFQGPIS
TruePositive	APT69829	1415	1422	1.7e-05	-4.76955	AIFQGPIS
TruePositive	ABF51187	1415	1422	1.7e-05	-4.76955	AIFQGPIS
TruePositive	ABF51189	1415	1422	1.7e-05	-4.76955	AIFQGPIS
TruePositive	ACK37399	1415	1422	1.7e-05	-4.76955	AIFQGPIS
TruePositive	ACK37436	1415	1422	1.7e-05	-4.76955	AIFQGPIS
TruePositive	ACK37419	1415	1422	1.7e-05	-4.76955	AIFQGPIS
TruePositive	ACK37385	1415	1422	1.7e-05	-4.76955	AIFQGPIS
TruePositive	APT69830	1416	1423	1.7e-05	-4.76955	AIFQGPIS
TruePositive	ABF51186	1416	1423	1.7e-05	-4.76955	AIFQGPIS
TruePositive	ACK37372	1416	1423	1.7e-05	-4.76955	AIFQGPIS
TruePositive	ACK37431	1416	1423	1.7e-05	-4.76955	AIFQGPIS
TruePositive	ACK37373	1416	1423	1.7e-05	-4.76955	AIFQGPIS
TruePositive	ACK37400	1416	1423	1.7e-05	-4.76955	AIFQGPIS
TruePositive	ABF51185	1417	1424	1.7e-05	-4.76955	AIFQGPIS
TruePositive	ANJ61548	1522	1529	1.75e-05	-4.75696	AGIQGPYT
TruePositive	QEG13947	1522	1529	1.75e-05	-4.75696	AGIQGPYT
TruePositive	ANJ61545	1522	1529	1.75e-05	-4.75696	AGIQGPYT
TruePositive	ANJ61595	1522	1529	1.75e-05	-4.75696	AGIQGPYT
TruePositive	BAW35375	1522	1529	1.75e-05	-4.75696	AGIQGPYT
TruePositive	QEG13923	1522	1529	1.75e-05	-4.75696	AGIQGPYT
TruePositive	ANJ61729	1522	1529	1.75e-05	-4.75696	AGIQGPYT
TruePositive	ANJ61561	1522	1529	1.75e-05	-4.75696	AGIQGPYT
TruePositive	BAW35376	1522	1529	1.75e-05	-4.75696	AGIQGPYT
TruePositive	QEG13924	1522	1529	1.75e-05	-4.75696	AGIQGPYT
TruePositive	QEG13934	1522	1529	1.75e-05	-4.75696	AGIQGPYT
TruePositive	ANJ61582	1522	1529	1.75e-05	-4.75696	AGIQGPYT
TruePositive	QEG13941	1522	1529	1.75e-05	-4.75696	AGIQGPYT
TruePositive	AKU75647	1522	1529	1.75e-05	-4.75696	AGIQGPYT
TruePositive	ANJ61547	1522	1529	1.75e-05	-4.75696	AGIQGPYT
TruePositive	BAW35374	1522	1529	1.75e-05	-4.75696	AGIQGPYT
TruePositive	QEG13945	1522	1529	1.75e-05	-4.75696	AGIQGPYT
TruePositive	ANJ61749	1522	1529	1.75e-05	-4.75696	AGIQGPYT
TruePositive	QEG13939	1522	1529	1.75e-05	-4.75696	AGIQGPYT
TruePositive	AIT52325	1522	1529	1.75e-05	-4.75696	AGIQGPYT
TruePositive	QEG13948	1522	1529	1.75e-05	-4.75696	AGIQGPYT
TruePositive	QEG13928	1522	1529	1.75e-05	-4.75696	AGIQGPYT
TruePositive	ANJ61568	1522	1529	1.75e-05	-4.75696	AGIQGPYT
TruePositive	AGC00381	1522	1529	1.75e-05	-4.75696	AGIQGPYT
TruePositive	ANJ61563	1522	1529	1.75e-05	-4.75696	AGIQGPYT
TruePositive	QEG13921	1522	1529	1.75e-05	-4.75696	AGIQGPYT
TruePositive	QEG13930	1522	1529	1.75e-05	-4.75696	AGIQGPYT
TruePositive	QEG13920	1522	1529	1.75e-05	-4.75696	AGIQGPYT
TruePositive	ANJ61550	1522	1529	1.75e-05	-4.75696	AGIQGPYT
TruePositive	QEG13935	1522	1529	1.75e-05	-4.75696	AGIQGPYT
TruePositive	ANJ61556	1522	1529	1.75e-05	-4.75696	AGIQGPYT
TruePositive	AFM73548	1522	1529	1.75e-05	-4.75696	AGIQGPYT
TruePositive	QEG13932	1522	1529	1.75e-05	-4.75696	AGIQGPYT
TruePositive	ANJ61546	1522	1529	1.75e-05	-4.75696	AGIQGPYT
TruePositive	BAW35377	1522	1529	1.75e-05	-4.75696	AGIQGPYT
TruePositive	ANJ61578	1522	1529	1.75e-05	-4.75696	AGIQGPYT
TruePositive	ANJ61542	1522	1529	1.75e-05	-4.75696	AGIQGPYT
TruePositive	ANJ61590	1522	1529	1.75e-05	-4.75696	AGIQGPYT
TruePositive	QEG13922	1522	1529	1.75e-05	-4.75696	AGIQGPYT
TruePositive	ANJ61567	1522	1529	1.75e-05	-4.75696	AGIQGPYT
TruePositive	QEG13944	1522	1529	1.75e-05	-4.75696	AGIQGPYT
TruePositive	AKU75622	1523	1530	1.75e-05	-4.75696	AGIQGPYT
TruePositive	QEG13980	1523	1530	1.75e-05	-4.75696	AGIQGPYT
TruePositive	AKU75607	1523	1530	1.75e-05	-4.75696	AGIQGPYT
TruePositive	QCE20691	1523	1530	1.75e-05	-4.75696	AGIQGPYT
TruePositive	ANJ61584	1523	1530	1.75e-05	-4.75696	AGIQGPYT
TruePositive	AOF41447	1523	1530	1.75e-05	-4.75696	AGIQGPYT
TruePositive	ANJ61748	1523	1530	1.75e-05	-4.75696	AGIQGPYT
TruePositive	AKU75633	1523	1530	1.75e-05	-4.75696	AGIQGPYT
TruePositive	ANE37235	1523	1530	1.75e-05	-4.75696	AGIQGPYT
TruePositive	ALP31155	1523	1530	1.75e-05	-4.75696	AGIQGPYT
TruePositive	AWW21306	1523	1530	1.75e-05	-4.75696	AGIQGPYT
TruePositive	ANN46854	1523	1530	1.75e-05	-4.75696	AGIQGPYT
TruePositive	QEG13959	1523	1530	1.75e-05	-4.75696	AGIQGPYT
TruePositive	AOV86537	1523	1530	1.75e-05	-4.75696	AGIQGPYT
TruePositive	ALP31101	1523	1530	1.75e-05	-4.75696	AGIQGPYT
TruePositive	ANJ61730	1523	1530	1.75e-05	-4.75696	AGIQGPYT
TruePositive	QEJ82274	1523	1530	1.75e-05	-4.75696	AGIQGPYT
TruePositive	ANJ61575	1523	1530	1.75e-05	-4.75696	AGIQGPYT
TruePositive	QEG13967	1523	1530	1.75e-05	-4.75696	AGIQGPYT
TruePositive	APU51946	1523	1530	1.75e-05	-4.75696	AGIQGPYT
TruePositive	ALP31153	1523	1530	1.75e-05	-4.75696	AGIQGPYT
TruePositive	QEG13992	1523	1530	1.75e-05	-4.75696	AGIQGPYT
TruePositive	ANJ61540	1523	1530	1.75e-05	-4.75696	AGIQGPYT
TruePositive	AWW21298	1523	1530	1.75e-05	-4.75696	AGIQGPYT
TruePositive	ALP31105	1523	1530	1.75e-05	-4.75696	AGIQGPYT
TruePositive	QEG13985	1523	1530	1.75e-05	-4.75696	AGIQGPYT
TruePositive	QCE20693	1523	1530	1.75e-05	-4.75696	AGIQGPYT
TruePositive	ALP31179	1523	1530	1.75e-05	-4.75696	AGIQGPYT
TruePositive	ALP31110	1523	1530	1.75e-05	-4.75696	AGIQGPYT
TruePositive	ANQ69418	1523	1530	1.75e-05	-4.75696	AGIQGPYT
TruePositive	QEG13961	1523	1530	1.75e-05	-4.75696	AGIQGPYT
TruePositive	ANN46856	1523	1530	1.75e-05	-4.75696	AGIQGPYT
TruePositive	AOV86535	1523	1530	1.75e-05	-4.75696	AGIQGPYT
TruePositive	QEG13926	1523	1530	1.75e-05	-4.75696	AGIQGPYT
TruePositive	AWW21309	1523	1530	1.75e-05	-4.75696	AGIQGPYT
TruePositive	ALP31082	1523	1530	1.75e-05	-4.75696	AGIQGPYT
TruePositive	ANJ61750	1523	1530	1.75e-05	-4.75696	AGIQGPYT
TruePositive	ANJ61587	1523	1530	1.75e-05	-4.75696	AGIQGPYT
TruePositive	ANZ79242	1523	1530	1.75e-05	-4.75696	AGIQGPYT
TruePositive	AIT52326	1523	1530	1.75e-05	-4.75696	AGIQGPYT
TruePositive	QCE20692	1523	1530	1.75e-05	-4.75696	AGIQGPYT
TruePositive	ALP31156	1523	1530	1.75e-05	-4.75696	AGIQGPYT
TruePositive	ANJ61574	1523	1530	1.75e-05	-4.75696	AGIQGPYT
TruePositive	AKU75601	1523	1530	1.75e-05	-4.75696	AGIQGPYT
TruePositive	ALP31135	1523	1530	1.75e-05	-4.75696	AGIQGPYT
TruePositive	AWW21311	1523	1530	1.75e-05	-4.75696	AGIQGPYT
TruePositive	AOV86539	1523	1530	1.75e-05	-4.75696	AGIQGPYT
TruePositive	AKQ44192	1523	1530	1.75e-05	-4.75696	AGIQGPYT
TruePositive	ALP31115	1523	1530	1.75e-05	-4.75696	AGIQGPYT
TruePositive	ANJ61731	1523	1530	1.75e-05	-4.75696	AGIQGPYT
TruePositive	AOF41443	1523	1530	1.75e-05	-4.75696	AGIQGPYT
TruePositive	BAW35418	1523	1530	1.75e-05	-4.75696	AGIQGPYT
TruePositive	AKU75635	1523	1530	1.75e-05	-4.75696	AGIQGPYT
TruePositive	QEG13951	1523	1530	1.75e-05	-4.75696	AGIQGPYT
TruePositive	AKU75621	1523	1530	1.75e-05	-4.75696	AGIQGPYT
TruePositive	QEG13977	1523	1530	1.75e-05	-4.75696	AGIQGPYT
TruePositive	AKT08827	1523	1530	1.75e-05	-4.75696	AGIQGPYT
TruePositive	ALP31092	1523	1530	1.75e-05	-4.75696	AGIQGPYT
TruePositive	AKU75629	1523	1530	1.75e-05	-4.75696	AGIQGPYT
TruePositive	AKU75639	1523	1530	1.75e-05	-4.75696	AGIQGPYT
TruePositive	AKT08833	1523	1530	1.75e-05	-4.75696	AGIQGPYT
TruePositive	QEU45798	1523	1530	1.75e-05	-4.75696	AGIQGPYT
TruePositive	APU51956	1523	1530	1.75e-05	-4.75696	AGIQGPYT
TruePositive	ANJ61579	1523	1530	1.75e-05	-4.75696	AGIQGPYT
TruePositive	ALP31157	1523	1530	1.75e-05	-4.75696	AGIQGPYT
TruePositive	ANJ61555	1523	1530	1.75e-05	-4.75696	AGIQGPYT
TruePositive	AYW17097	1523	1530	1.75e-05	-4.75696	AGIQGPYT
TruePositive	ALP31120	1523	1530	1.75e-05	-4.75696	AGIQGPYT
TruePositive	AKU75614	1523	1530	1.75e-05	-4.75696	AGIQGPYT
TruePositive	QEU45799	1523	1530	1.75e-05	-4.75696	AGIQGPYT
TruePositive	ANN46849	1523	1530	1.75e-05	-4.75696	AGIQGPYT
TruePositive	QEG13957	1523	1530	1.75e-05	-4.75696	AGIQGPYT
TruePositive	QEG13950	1523	1530	1.75e-05	-4.75696	AGIQGPYT
TruePositive	ALP31124	1523	1530	1.75e-05	-4.75696	AGIQGPYT
TruePositive	QEG13929	1523	1530	1.75e-05	-4.75696	AGIQGPYT
TruePositive	APU51951	1523	1530	1.75e-05	-4.75696	AGIQGPYT
TruePositive	QEJ82282	1523	1530	1.75e-05	-4.75696	AGIQGPYT
TruePositive	ALP31142	1523	1530	1.75e-05	-4.75696	AGIQGPYT
TruePositive	QEJ82277	1523	1530	1.75e-05	-4.75696	AGIQGPYT
TruePositive	APP91863	1523	1530	1.75e-05	-4.75696	AGIQGPYT
TruePositive	QEG13956	1523	1530	1.75e-05	-4.75696	AGIQGPYT
TruePositive	QCE20690	1523	1530	1.75e-05	-4.75696	AGIQGPYT
TruePositive	ANN46826	1523	1530	1.75e-05	-4.75696	AGIQGPYT
TruePositive	ANN46832	1523	1530	1.75e-05	-4.75696	AGIQGPYT
TruePositive	ANN46830	1523	1530	1.75e-05	-4.75696	AGIQGPYT
TruePositive	ALP31166	1523	1530	1.75e-05	-4.75696	AGIQGPYT
TruePositive	ANN46861	1523	1530	1.75e-05	-4.75696	AGIQGPYT
TruePositive	AKU75610	1523	1530	1.75e-05	-4.75696	AGIQGPYT
TruePositive	QBA90621	1523	1530	1.75e-05	-4.75696	AGIQGPYT
TruePositive	AKU75644	1523	1530	1.75e-05	-4.75696	AGIQGPYT
TruePositive	AOV86536	1523	1530	1.75e-05	-4.75696	AGIQGPYT
TruePositive	AZL49233	1523	1530	1.75e-05	-4.75696	AGIQGPYT
TruePositive	ALP31111	1523	1530	1.75e-05	-4.75696	AGIQGPYT
TruePositive	AWW21302	1523	1530	1.75e-05	-4.75696	AGIQGPYT
TruePositive	ANJ61559	1523	1530	1.75e-05	-4.75696	AGIQGPYT
TruePositive	ANN46851	1523	1530	1.75e-05	-4.75696	AGIQGPYT
TruePositive	AOV86540	1523	1530	1.75e-05	-4.75696	AGIQGPYT
TruePositive	AWW21305	1523	1530	1.75e-05	-4.75696	AGIQGPYT
TruePositive	BAW35415	1523	1530	1.75e-05	-4.75696	AGIQGPYT
TruePositive	QEG13983	1523	1530	1.75e-05	-4.75696	AGIQGPYT
TruePositive	ALG02131	1523	1530	1.75e-05	-4.75696	AGIQGPYT
TruePositive	APP91862	1523	1530	1.75e-05	-4.75696	AGIQGPYT
TruePositive	ANJ61541	1523	1530	1.75e-05	-4.75696	AGIQGPYT
TruePositive	AWW21300	1523	1530	1.75e-05	-4.75696	AGIQGPYT
TruePositive	ANN46828	1523	1530	1.75e-05	-4.75696	AGIQGPYT
TruePositive	QEG13931	1523	1530	1.75e-05	-4.75696	AGIQGPYT
TruePositive	QEJ82278	1523	1530	1.75e-05	-4.75696	AGIQGPYT
TruePositive	QEG13962	1523	1530	1.75e-05	-4.75696	AGIQGPYT
TruePositive	ANJ61565	1523	1530	1.75e-05	-4.75696	AGIQGPYT
TruePositive	QCE20698	1523	1530	1.75e-05	-4.75696	AGIQGPYT
TruePositive	QEU45797	1523	1530	1.75e-05	-4.75696	AGIQGPYT
TruePositive	QCE20699	1523	1530	1.75e-05	-4.75696	AGIQGPYT
TruePositive	QBA90622	1523	1530	1.75e-05	-4.75696	AGIQGPYT
TruePositive	QEG13976	1523	1530	1.75e-05	-4.75696	AGIQGPYT
TruePositive	ANJ61554	1523	1530	1.75e-05	-4.75696	AGIQGPYT
TruePositive	ALP31154	1523	1530	1.75e-05	-4.75696	AGIQGPYT
TruePositive	AKU75642	1523	1530	1.75e-05	-4.75696	AGIQGPYT
TruePositive	QEG13991	1523	1530	1.75e-05	-4.75696	AGIQGPYT
TruePositive	ALP31132	1523	1530	1.75e-05	-4.75696	AGIQGPYT
TruePositive	ALP31176	1523	1530	1.75e-05	-4.75696	AGIQGPYT
TruePositive	ALP31104	1523	1530	1.75e-05	-4.75696	AGIQGPYT
TruePositive	ALP31103	1523	1530	1.75e-05	-4.75696	AGIQGPYT
TruePositive	ALP31088	1523	1530	1.75e-05	-4.75696	AGIQGPYT
TruePositive	ALP31095	1523	1530	1.75e-05	-4.75696	AGIQGPYT
TruePositive	AKU75631	1523	1530	1.75e-05	-4.75696	AGIQGPYT
TruePositive	AKU75646	1523	1530	1.75e-05	-4.75696	AGIQGPYT
TruePositive	ALP31130	1523	1530	1.75e-05	-4.75696	AGIQGPYT
TruePositive	ALP31125	1523	1530	1.75e-05	-4.75696	AGIQGPYT
TruePositive	ANJ61601	1523	1530	1.75e-05	-4.75696	AGIQGPYT
TruePositive	ANJ61732	1523	1530	1.75e-05	-4.75696	AGIQGPYT
TruePositive	AMB37294	1523	1530	1.75e-05	-4.75696	AGIQGPYT
TruePositive	QEG13958	1523	1530	1.75e-05	-4.75696	AGIQGPYT
TruePositive	AAR98503	1523	1530	1.75e-05	-4.75696	AGIQGPYT
TruePositive	ANJ61580	1523	1530	1.75e-05	-4.75696	AGIQGPYT
TruePositive	AKU75594	1523	1530	1.75e-05	-4.75696	AGIQGPYT
TruePositive	AKU75625	1523	1530	1.75e-05	-4.75696	AGIQGPYT
TruePositive	QCE20694	1523	1530	1.75e-05	-4.75696	AGIQGPYT
TruePositive	AJI76555	1523	1530	1.75e-05	-4.75696	AGIQGPYT
TruePositive	ANJ61549	1523	1530	1.75e-05	-4.75696	AGIQGPYT
TruePositive	AKQ44195	1523	1530	1.75e-05	-4.75696	AGIQGPYT
TruePositive	ANZ79244	1523	1530	1.75e-05	-4.75696	AGIQGPYT
TruePositive	AKU75606	1523	1530	1.75e-05	-4.75696	AGIQGPYT
TruePositive	ALP31147	1523	1530	1.75e-05	-4.75696	AGIQGPYT
TruePositive	ALP31133	1523	1530	1.75e-05	-4.75696	AGIQGPYT
TruePositive	QEG13937	1523	1530	1.75e-05	-4.75696	AGIQGPYT
TruePositive	AWW21301	1523	1530	1.75e-05	-4.75696	AGIQGPYT
TruePositive	QEG13954	1523	1530	1.75e-05	-4.75696	AGIQGPYT
TruePositive	QCE20705	1523	1530	1.75e-05	-4.75696	AGIQGPYT
TruePositive	ANN46843	1523	1530	1.75e-05	-4.75696	AGIQGPYT
TruePositive	ANJ61725	1523	1530	1.75e-05	-4.75696	AGIQGPYT
TruePositive	ANJ61733	1523	1530	1.75e-05	-4.75696	AGIQGPYT
TruePositive	QEG13973	1523	1530	1.75e-05	-4.75696	AGIQGPYT
TruePositive	AYW17090	1523	1530	1.75e-05	-4.75696	AGIQGPYT
TruePositive	ANJ61734	1523	1530	1.75e-05	-4.75696	AGIQGPYT
TruePositive	BAK08578	1523	1530	1.75e-05	-4.75696	AGIQGPYT
TruePositive	ALP31093	1523	1530	1.75e-05	-4.75696	AGIQGPYT
TruePositive	ALP31116	1523	1530	1.75e-05	-4.75696	AGIQGPYT
TruePositive	ANE37234	1523	1530	1.75e-05	-4.75696	AGIQGPYT
TruePositive	AKU75645	1523	1530	1.75e-05	-4.75696	AGIQGPYT
TruePositive	AOF41448	1523	1530	1.75e-05	-4.75696	AGIQGPYT
TruePositive	AKQ44196	1523	1530	1.75e-05	-4.75696	AGIQGPYT
TruePositive	ANJ61571	1523	1530	1.75e-05	-4.75696	AGIQGPYT
TruePositive	AYW17092	1523	1530	1.75e-05	-4.75696	AGIQGPYT
TruePositive	ANJ61744	1523	1530	1.75e-05	-4.75696	AGIQGPYT
TruePositive	ALP31122	1523	1530	1.75e-05	-4.75696	AGIQGPYT
TruePositive	ANJ61736	1523	1530	1.75e-05	-4.75696	AGIQGPYT
TruePositive	AKU75634	1523	1530	1.75e-05	-4.75696	AGIQGPYT
TruePositive	AKU75615	1523	1530	1.75e-05	-4.75696	AGIQGPYT
TruePositive	ANQ44597	1523	1530	1.75e-05	-4.75696	AGIQGPYT
TruePositive	ALP31143	1523	1530	1.75e-05	-4.75696	AGIQGPYT
TruePositive	QEJ82281	1523	1530	1.75e-05	-4.75696	AGIQGPYT
TruePositive	ANJ61746	1523	1530	1.75e-05	-4.75696	AGIQGPYT
TruePositive	ANN46853	1523	1530	1.75e-05	-4.75696	AGIQGPYT
TruePositive	ANN46842	1523	1530	1.75e-05	-4.75696	AGIQGPYT
TruePositive	ANJ61728	1523	1530	1.75e-05	-4.75696	AGIQGPYT
TruePositive	ANJ61596	1523	1530	1.75e-05	-4.75696	AGIQGPYT
TruePositive	QEU45796	1523	1530	1.75e-05	-4.75696	AGIQGPYT
TruePositive	ALP31149	1523	1530	1.75e-05	-4.75696	AGIQGPYT
TruePositive	ALP31145	1523	1530	1.75e-05	-4.75696	AGIQGPYT
TruePositive	ALP31160	1523	1530	1.75e-05	-4.75696	AGIQGPYT
TruePositive	APU51957	1523	1530	1.75e-05	-4.75696	AGIQGPYT
TruePositive	ANJ61581	1523	1530	1.75e-05	-4.75696	AGIQGPYT
TruePositive	BAW35416	1523	1530	1.75e-05	-4.75696	AGIQGPYT
TruePositive	AJI76570	1523	1530	1.75e-05	-4.75696	AGIQGPYT
TruePositive	AKU75604	1523	1530	1.75e-05	-4.75696	AGIQGPYT
TruePositive	QCE20695	1523	1530	1.75e-05	-4.75696	AGIQGPYT
TruePositive	ALP31113	1523	1530	1.75e-05	-4.75696	AGIQGPYT
TruePositive	QEG13979	1523	1530	1.75e-05	-4.75696	AGIQGPYT
TruePositive	ALP31123	1523	1530	1.75e-05	-4.75696	AGIQGPYT
TruePositive	AWW21310	1523	1530	1.75e-05	-4.75696	AGIQGPYT
TruePositive	AOF41445	1523	1530	1.75e-05	-4.75696	AGIQGPYT
TruePositive	QEG13966	1523	1530	1.75e-05	-4.75696	AGIQGPYT
TruePositive	ALJ53630	1523	1530	1.75e-05	-4.75696	AGIQGPYT
TruePositive	QEG13938	1523	1530	1.75e-05	-4.75696	AGIQGPYT
TruePositive	ANJ61588	1523	1530	1.75e-05	-4.75696	AGIQGPYT
TruePositive	ANJ61747	1523	1530	1.75e-05	-4.75696	AGIQGPYT
TruePositive	AKU75593	1523	1530	1.75e-05	-4.75696	AGIQGPYT
TruePositive	ANJ61600	1523	1530	1.75e-05	-4.75696	AGIQGPYT
TruePositive	QCE20706	1523	1530	1.75e-05	-4.75696	AGIQGPYT
TruePositive	AOF41442	1523	1530	1.75e-05	-4.75696	AGIQGPYT
TruePositive	ANN46829	1523	1530	1.75e-05	-4.75696	AGIQGPYT
TruePositive	ALP31129	1523	1530	1.75e-05	-4.75696	AGIQGPYT
TruePositive	AKU75609	1523	1530	1.75e-05	-4.75696	AGIQGPYT
TruePositive	QCE20704	1523	1530	1.75e-05	-4.75696	AGIQGPYT
TruePositive	ANN46835	1523	1530	1.75e-05	-4.75696	AGIQGPYT
TruePositive	ALP31100	1523	1530	1.75e-05	-4.75696	AGIQGPYT
TruePositive	ANJ61572	1523	1530	1.75e-05	-4.75696	AGIQGPYT
TruePositive	ABL61317	1523	1530	1.75e-05	-4.75696	AGIQGPYT
TruePositive	ALP31081	1523	1530	1.75e-05	-4.75696	AGIQGPYT
TruePositive	AOV86534	1523	1530	1.75e-05	-4.75696	AGIQGPYT
TruePositive	ALP31089	1523	1530	1.75e-05	-4.75696	AGIQGPYT
TruePositive	QEG13965	1523	1530	1.75e-05	-4.75696	AGIQGPYT
TruePositive	ANJ61742	1523	1530	1.75e-05	-4.75696	AGIQGPYT
TruePositive	ANJ61592	1523	1530	1.75e-05	-4.75696	AGIQGPYT
TruePositive	QEJ82276	1523	1530	1.75e-05	-4.75696	AGIQGPYT
TruePositive	APU51948	1523	1530	1.75e-05	-4.75696	AGIQGPYT
TruePositive	ANJ61751	1523	1530	1.75e-05	-4.75696	AGIQGPYT
TruePositive	ANJ61720	1523	1530	1.75e-05	-4.75696	AGIQGPYT
TruePositive	ALP31167	1523	1530	1.75e-05	-4.75696	AGIQGPYT
TruePositive	ALP31148	1523	1530	1.75e-05	-4.75696	AGIQGPYT
TruePositive	ALP31114	1523	1530	1.75e-05	-4.75696	AGIQGPYT
TruePositive	AWW21304	1523	1530	1.75e-05	-4.75696	AGIQGPYT
TruePositive	QEG13974	1523	1530	1.75e-05	-4.75696	AGIQGPYT
TruePositive	BAW35419	1523	1530	1.75e-05	-4.75696	AGIQGPYT
TruePositive	QEU45795	1523	1530	1.75e-05	-4.75696	AGIQGPYT
TruePositive	QEG13988	1523	1530	1.75e-05	-4.75696	AGIQGPYT
TruePositive	AKU75623	1523	1530	1.75e-05	-4.75696	AGIQGPYT
TruePositive	AKU75636	1523	1530	1.75e-05	-4.75696	AGIQGPYT
TruePositive	AKU75596	1523	1530	1.75e-05	-4.75696	AGIQGPYT
TruePositive	QEG13925	1523	1530	1.75e-05	-4.75696	AGIQGPYT
TruePositive	ALP31134	1523	1530	1.75e-05	-4.75696	AGIQGPYT
TruePositive	AOV86541	1523	1530	1.75e-05	-4.75696	AGIQGPYT
TruePositive	AKU75598	1523	1530	1.75e-05	-4.75696	AGIQGPYT
TruePositive	ANN46850	1523	1530	1.75e-05	-4.75696	AGIQGPYT
TruePositive	QEG13943	1523	1530	1.75e-05	-4.75696	AGIQGPYT
TruePositive	ANN46838	1523	1530	1.75e-05	-4.75696	AGIQGPYT
TruePositive	ALP31177	1523	1530	1.75e-05	-4.75696	AGIQGPYT
TruePositive	AKU75619	1523	1530	1.75e-05	-4.75696	AGIQGPYT
TruePositive	AKU75617	1523	1530	1.75e-05	-4.75696	AGIQGPYT
TruePositive	ALP31151	1523	1530	1.75e-05	-4.75696	AGIQGPYT
TruePositive	AKU75630	1523	1530	1.75e-05	-4.75696	AGIQGPYT
TruePositive	AYW17093	1523	1530	1.75e-05	-4.75696	AGIQGPYT
TruePositive	AJI76568	1523	1530	1.75e-05	-4.75696	AGIQGPYT
TruePositive	ANJ61560	1523	1530	1.75e-05	-4.75696	AGIQGPYT
TruePositive	QEG13986	1523	1530	1.75e-05	-4.75696	AGIQGPYT
TruePositive	AVW85865	1523	1530	1.75e-05	-4.75696	AGIQGPYT
TruePositive	ALP31173	1523	1530	1.75e-05	-4.75696	AGIQGPYT
TruePositive	QEG13953	1523	1530	1.75e-05	-4.75696	AGIQGPYT
TruePositive	ALP31146	1523	1530	1.75e-05	-4.75696	AGIQGPYT
TruePositive	QEG14007	1523	1530	1.75e-05	-4.75696	AGIQGPYT
TruePositive	ANJ61723	1523	1530	1.75e-05	-4.75696	AGIQGPYT
TruePositive	ANJ61583	1523	1530	1.75e-05	-4.75696	AGIQGPYT
TruePositive	ANJ61544	1523	1530	1.75e-05	-4.75696	AGIQGPYT
TruePositive	ANN46858	1523	1530	1.75e-05	-4.75696	AGIQGPYT
TruePositive	ALP31158	1523	1530	1.75e-05	-4.75696	AGIQGPYT
TruePositive	QEG13989	1523	1530	1.75e-05	-4.75696	AGIQGPYT
TruePositive	AWW18929	1523	1530	1.75e-05	-4.75696	AGIQGPYT
TruePositive	ANJ61569	1523	1530	1.75e-05	-4.75696	AGIQGPYT
TruePositive	ANJ61564	1523	1530	1.75e-05	-4.75696	AGIQGPYT
TruePositive	ANQ69419	1523	1530	1.75e-05	-4.75696	AGIQGPYT
TruePositive	AKU75605	1523	1530	1.75e-05	-4.75696	AGIQGPYT
TruePositive	ALP31102	1523	1530	1.75e-05	-4.75696	AGIQGPYT
TruePositive	ANN46848	1523	1530	1.75e-05	-4.75696	AGIQGPYT
TruePositive	ALP31138	1523	1530	1.75e-05	-4.75696	AGIQGPYT
TruePositive	ANN46859	1523	1530	1.75e-05	-4.75696	AGIQGPYT
TruePositive	ALP31165	1523	1530	1.75e-05	-4.75696	AGIQGPYT
TruePositive	ANN46855	1523	1530	1.75e-05	-4.75696	AGIQGPYT
TruePositive	QEG13975	1523	1530	1.75e-05	-4.75696	AGIQGPYT
TruePositive	QEG13933	1523	1530	1.75e-05	-4.75696	AGIQGPYT
TruePositive	ANQ69417	1523	1530	1.75e-05	-4.75696	AGIQGPYT
TruePositive	AKQ44191	1523	1530	1.75e-05	-4.75696	AGIQGPYT
TruePositive	ALP31118	1523	1530	1.75e-05	-4.75696	AGIQGPYT
TruePositive	ALP31175	1523	1530	1.75e-05	-4.75696	AGIQGPYT
TruePositive	ANJ61573	1523	1530	1.75e-05	-4.75696	AGIQGPYT
TruePositive	AYW17089	1523	1530	1.75e-05	-4.75696	AGIQGPYT
TruePositive	ANJ61552	1523	1530	1.75e-05	-4.75696	AGIQGPYT
TruePositive	QEG13984	1523	1530	1.75e-05	-4.75696	AGIQGPYT
TruePositive	AKU75637	1523	1530	1.75e-05	-4.75696	AGIQGPYT
TruePositive	AKU75592	1523	1530	1.75e-05	-4.75696	AGIQGPYT
TruePositive	AKU75640	1523	1530	1.75e-05	-4.75696	AGIQGPYT
TruePositive	ANJ61558	1523	1530	1.75e-05	-4.75696	AGIQGPYT
TruePositive	AWW21303	1523	1530	1.75e-05	-4.75696	AGIQGPYT
TruePositive	QBA90620	1523	1530	1.75e-05	-4.75696	AGIQGPYT
TruePositive	AKU75620	1523	1530	1.75e-05	-4.75696	AGIQGPYT
TruePositive	ANJ61740	1523	1530	1.75e-05	-4.75696	AGIQGPYT
TruePositive	ANN46860	1523	1530	1.75e-05	-4.75696	AGIQGPYT
TruePositive	ALP31178	1523	1530	1.75e-05	-4.75696	AGIQGPYT
TruePositive	ALP31109	1523	1530	1.75e-05	-4.75696	AGIQGPYT
TruePositive	AWW21307	1523	1530	1.75e-05	-4.75696	AGIQGPYT
TruePositive	ANJ61591	1523	1530	1.75e-05	-4.75696	AGIQGPYT
TruePositive	AKT08836	1523	1530	1.75e-05	-4.75696	AGIQGPYT
TruePositive	AKU75600	1523	1530	1.75e-05	-4.75696	AGIQGPYT
TruePositive	ALP31085	1523	1530	1.75e-05	-4.75696	AGIQGPYT
TruePositive	ALP31161	1523	1530	1.75e-05	-4.75696	AGIQGPYT
TruePositive	ANN46836	1523	1530	1.75e-05	-4.75696	AGIQGPYT
TruePositive	ANJ61562	1523	1530	1.75e-05	-4.75696	AGIQGPYT
TruePositive	QEJ82283	1523	1530	1.75e-05	-4.75696	AGIQGPYT
TruePositive	AOF41449	1523	1530	1.75e-05	-4.75696	AGIQGPYT
TruePositive	ANJ61722	1523	1530	1.75e-05	-4.75696	AGIQGPYT
TruePositive	ALP31083	1523	1530	1.75e-05	-4.75696	AGIQGPYT
TruePositive	AKU75602	1523	1530	1.75e-05	-4.75696	AGIQGPYT
TruePositive	ANJ61594	1523	1530	1.75e-05	-4.75696	AGIQGPYT
TruePositive	ALP31094	1523	1530	1.75e-05	-4.75696	AGIQGPYT
TruePositive	AJI76571	1523	1530	1.75e-05	-4.75696	AGIQGPYT
TruePositive	APU51945	1523	1530	1.75e-05	-4.75696	AGIQGPYT
TruePositive	AOF41446	1523	1530	1.75e-05	-4.75696	AGIQGPYT
TruePositive	AKU75632	1523	1530	1.75e-05	-4.75696	AGIQGPYT
TruePositive	QEG13964	1523	1530	1.75e-05	-4.75696	AGIQGPYT
TruePositive	AWW21308	1523	1530	1.75e-05	-4.75696	AGIQGPYT
TruePositive	AKU75595	1523	1530	1.75e-05	-4.75696	AGIQGPYT
TruePositive	QEG13949	1523	1530	1.75e-05	-4.75696	AGIQGPYT
TruePositive	ANJ61735	1523	1530	1.75e-05	-4.75696	AGIQGPYT
TruePositive	QEJ82272	1523	1530	1.75e-05	-4.75696	AGIQGPYT
TruePositive	QEJ82279	1523	1530	1.75e-05	-4.75696	AGIQGPYT
TruePositive	ANJ61726	1523	1530	1.75e-05	-4.75696	AGIQGPYT
TruePositive	ALP31141	1523	1530	1.75e-05	-4.75696	AGIQGPYT
TruePositive	AKU75597	1523	1530	1.75e-05	-4.75696	AGIQGPYT
TruePositive	APU51954	1523	1530	1.75e-05	-4.75696	AGIQGPYT
TruePositive	ALP31137	1523	1530	1.75e-05	-4.75696	AGIQGPYT
TruePositive	AKU75641	1523	1530	1.75e-05	-4.75696	AGIQGPYT
TruePositive	AKU75611	1523	1530	1.75e-05	-4.75696	AGIQGPYT
TruePositive	BBM96399	1523	1530	1.75e-05	-4.75696	AGIQGPYT
TruePositive	ANN46845	1523	1530	1.75e-05	-4.75696	AGIQGPYT
TruePositive	ANJ61598	1523	1530	1.75e-05	-4.75696	AGIQGPYT
TruePositive	ANJ61743	1523	1530	1.75e-05	-4.75696	AGIQGPYT
TruePositive	APU51955	1523	1530	1.75e-05	-4.75696	AGIQGPYT
TruePositive	BAW35417	1523	1530	1.75e-05	-4.75696	AGIQGPYT
TruePositive	ANN46846	1523	1530	1.75e-05	-4.75696	AGIQGPYT
TruePositive	ANE37233	1523	1530	1.75e-05	-4.75696	AGIQGPYT
TruePositive	ALP31162	1523	1530	1.75e-05	-4.75696	AGIQGPYT
TruePositive	AYW17094	1523	1530	1.75e-05	-4.75696	AGIQGPYT
TruePositive	QCE20702	1523	1530	1.75e-05	-4.75696	AGIQGPYT
TruePositive	AOF41452	1523	1530	1.75e-05	-4.75696	AGIQGPYT
TruePositive	ANN46840	1523	1530	1.75e-05	-4.75696	AGIQGPYT
TruePositive	ALP31127	1523	1530	1.75e-05	-4.75696	AGIQGPYT
TruePositive	ANJ61593	1523	1530	1.75e-05	-4.75696	AGIQGPYT
TruePositive	AKU75616	1523	1530	1.75e-05	-4.75696	AGIQGPYT
TruePositive	AKU75628	1523	1530	1.75e-05	-4.75696	AGIQGPYT
TruePositive	ANJ61737	1523	1530	1.75e-05	-4.75696	AGIQGPYT
TruePositive	ANJ61719	1523	1530	1.75e-05	-4.75696	AGIQGPYT
TruePositive	QCE20701	1523	1530	1.75e-05	-4.75696	AGIQGPYT
TruePositive	AKU75627	1523	1530	1.75e-05	-4.75696	AGIQGPYT
TruePositive	AKU75613	1523	1530	1.75e-05	-4.75696	AGIQGPYT
TruePositive	ANJ61597	1523	1530	1.75e-05	-4.75696	AGIQGPYT
TruePositive	AJI76564	1523	1530	1.75e-05	-4.75696	AGIQGPYT
TruePositive	ANQ69416	1523	1530	1.75e-05	-4.75696	AGIQGPYT
TruePositive	ANJ61576	1523	1530	1.75e-05	-4.75696	AGIQGPYT
TruePositive	AOF41444	1523	1530	1.75e-05	-4.75696	AGIQGPYT
TruePositive	AKU75612	1523	1530	1.75e-05	-4.75696	AGIQGPYT
TruePositive	QEJ82275	1523	1530	1.75e-05	-4.75696	AGIQGPYT
TruePositive	ANN46839	1523	1530	1.75e-05	-4.75696	AGIQGPYT
TruePositive	QEJ82284	1523	1530	1.75e-05	-4.75696	AGIQGPYT
TruePositive	ALP31152	1523	1530	1.75e-05	-4.75696	AGIQGPYT
TruePositive	AVW85864	1523	1530	1.75e-05	-4.75696	AGIQGPYT
TruePositive	QEG13971	1523	1530	1.75e-05	-4.75696	AGIQGPYT
TruePositive	QEG13970	1523	1530	1.75e-05	-4.75696	AGIQGPYT
TruePositive	APU51949	1523	1530	1.75e-05	-4.75696	AGIQGPYT
TruePositive	ALP31159	1523	1530	1.75e-05	-4.75696	AGIQGPYT
TruePositive	ALP31090	1523	1530	1.75e-05	-4.75696	AGIQGPYT
TruePositive	QCE20700	1523	1530	1.75e-05	-4.75696	AGIQGPYT
TruePositive	ANJ61589	1523	1530	1.75e-05	-4.75696	AGIQGPYT
TruePositive	AKQ44188	1523	1530	1.75e-05	-4.75696	AGIQGPYT
TruePositive	ANJ61553	1523	1530	1.75e-05	-4.75696	AGIQGPYT
TruePositive	ANN46831	1523	1530	1.75e-05	-4.75696	AGIQGPYT
TruePositive	BAW35421	1523	1530	1.75e-05	-4.75696	AGIQGPYT
TruePositive	ALP31171	1523	1530	1.75e-05	-4.75696	AGIQGPYT
TruePositive	QEG13987	1523	1530	1.75e-05	-4.75696	AGIQGPYT
TruePositive	BBM96400	1523	1530	1.75e-05	-4.75696	AGIQGPYT
TruePositive	AKU75643	1523	1530	1.75e-05	-4.75696	AGIQGPYT
TruePositive	QEG13942	1523	1530	1.75e-05	-4.75696	AGIQGPYT
TruePositive	APU51950	1523	1530	1.75e-05	-4.75696	AGIQGPYT
TruePositive	ANJ61539	1523	1530	1.75e-05	-4.75696	AGIQGPYT
TruePositive	AOV86538	1523	1530	1.75e-05	-4.75696	AGIQGPYT
TruePositive	ANN46852	1523	1530	1.75e-05	-4.75696	AGIQGPYT
TruePositive	ANJ61570	1523	1530	1.75e-05	-4.75696	AGIQGPYT
TruePositive	ANJ61551	1523	1530	1.75e-05	-4.75696	AGIQGPYT
TruePositive	AKQ44189	1523	1530	1.75e-05	-4.75696	AGIQGPYT
TruePositive	ALP31136	1523	1530	1.75e-05	-4.75696	AGIQGPYT
TruePositive	AOF41451	1523	1530	1.75e-05	-4.75696	AGIQGPYT
TruePositive	AZL41614	1523	1530	1.75e-05	-4.75696	AGIQGPYT
TruePositive	ANJ61718	1523	1530	1.75e-05	-4.75696	AGIQGPYT
TruePositive	QEU45794	1523	1530	1.75e-05	-4.75696	AGIQGPYT
TruePositive	ALP31117	1523	1530	1.75e-05	-4.75696	AGIQGPYT
TruePositive	AWW21312	1523	1530	1.75e-05	-4.75696	AGIQGPYT
TruePositive	ANQ69420	1523	1530	1.75e-05	-4.75696	AGIQGPYT
TruePositive	AOV86542	1523	1530	1.75e-05	-4.75696	AGIQGPYT
TruePositive	AKU75599	1523	1530	1.75e-05	-4.75696	AGIQGPYT
TruePositive	AJI76559	1523	1530	1.75e-05	-4.75696	AGIQGPYT
TruePositive	ALP31150	1523	1530	1.75e-05	-4.75696	AGIQGPYT
TruePositive	YP_009505605	1523	1530	1.75e-05	-4.75696	AGIQGPYT
TruePositive	QCE20634	1523	1530	1.75e-05	-4.75696	AGIQGPYT
TruePositive	ALP31086	1523	1530	1.75e-05	-4.75696	AGIQGPYT
TruePositive	QEG13946	1523	1530	1.75e-05	-4.75696	AGIQGPYT
TruePositive	ANN46844	1523	1530	1.75e-05	-4.75696	AGIQGPYT
TruePositive	ALP31107	1523	1530	1.75e-05	-4.75696	AGIQGPYT
TruePositive	QCE20696	1523	1530	1.75e-05	-4.75696	AGIQGPYT
TruePositive	ANJ61586	1523	1530	1.75e-05	-4.75696	AGIQGPYT
TruePositive	AKU75618	1523	1530	1.75e-05	-4.75696	AGIQGPYT
TruePositive	ANJ61738	1523	1530	1.75e-05	-4.75696	AGIQGPYT
TruePositive	AKU75608	1523	1530	1.75e-05	-4.75696	AGIQGPYT
TruePositive	ALP31096	1523	1530	1.75e-05	-4.75696	AGIQGPYT
TruePositive	AOF41450	1523	1530	1.75e-05	-4.75696	AGIQGPYT
TruePositive	ANN46837	1523	1530	1.75e-05	-4.75696	AGIQGPYT
TruePositive	ALP31097	1523	1530	1.75e-05	-4.75696	AGIQGPYT
TruePositive	ALP31087	1523	1530	1.75e-05	-4.75696	AGIQGPYT
TruePositive	ALP31108	1523	1530	1.75e-05	-4.75696	AGIQGPYT
TruePositive	AJI76561	1523	1530	1.75e-05	-4.75696	AGIQGPYT
TruePositive	ANJ61557	1523	1530	1.75e-05	-4.75696	AGIQGPYT
TruePositive	ALP31099	1523	1530	1.75e-05	-4.75696	AGIQGPYT
TruePositive	ALJ53629	1523	1530	1.75e-05	-4.75696	AGIQGPYT
TruePositive	AKT08834	1523	1530	1.75e-05	-4.75696	AGIQGPYT
TruePositive	ALP31112	1523	1530	1.75e-05	-4.75696	AGIQGPYT
TruePositive	QEJ82273	1523	1530	1.75e-05	-4.75696	AGIQGPYT
TruePositive	APU51952	1523	1530	1.75e-05	-4.75696	AGIQGPYT
TruePositive	ANJ61745	1523	1530	1.75e-05	-4.75696	AGIQGPYT
TruePositive	AIZ48771	1523	1530	1.75e-05	-4.75696	AGIQGPYT
TruePositive	ANJ61724	1523	1530	1.75e-05	-4.75696	AGIQGPYT
TruePositive	ANN46827	1523	1530	1.75e-05	-4.75696	AGIQGPYT
TruePositive	ANJ61577	1523	1530	1.75e-05	-4.75696	AGIQGPYT
TruePositive	ALP31169	1523	1530	1.75e-05	-4.75696	AGIQGPYT
TruePositive	QEG13955	1523	1530	1.75e-05	-4.75696	AGIQGPYT
TruePositive	QEG13963	1523	1530	1.75e-05	-4.75696	AGIQGPYT
TruePositive	ALP31091	1523	1530	1.75e-05	-4.75696	AGIQGPYT
TruePositive	ANJ61727	1523	1530	1.75e-05	-4.75696	AGIQGPYT
TruePositive	ANN46847	1523	1530	1.75e-05	-4.75696	AGIQGPYT
TruePositive	QEG13969	1523	1530	1.75e-05	-4.75696	AGIQGPYT
TruePositive	AKU75626	1523	1530	1.75e-05	-4.75696	AGIQGPYT
TruePositive	QEJ82271	1523	1530	1.75e-05	-4.75696	AGIQGPYT
TruePositive	ANN46841	1523	1530	1.75e-05	-4.75696	AGIQGPYT
TruePositive	QEG13940	1523	1530	1.75e-05	-4.75696	AGIQGPYT
TruePositive	ALP31144	1523	1530	1.75e-05	-4.75696	AGIQGPYT
TruePositive	BAK08577	1523	1530	1.75e-05	-4.75696	AGIQGPYT
TruePositive	ALP31121	1523	1530	1.75e-05	-4.75696	AGIQGPYT
TruePositive	ALP31140	1523	1530	1.75e-05	-4.75696	AGIQGPYT
TruePositive	AWW21299	1523	1530	1.75e-05	-4.75696	AGIQGPYT
TruePositive	ALP31163	1523	1530	1.75e-05	-4.75696	AGIQGPYT
TruePositive	ALP31119	1523	1530	1.75e-05	-4.75696	AGIQGPYT
TruePositive	ALP31098	1523	1530	1.75e-05	-4.75696	AGIQGPYT
TruePositive	ANJ61739	1523	1530	1.75e-05	-4.75696	AGIQGPYT
TruePositive	ALP31139	1523	1530	1.75e-05	-4.75696	AGIQGPYT
TruePositive	AKQ44190	1523	1530	1.75e-05	-4.75696	AGIQGPYT
TruePositive	QEG13994	1523	1530	1.75e-05	-4.75696	AGIQGPYT
TruePositive	ANJ61741	1523	1530	1.75e-05	-4.75696	AGIQGPYT
TruePositive	ANE37236	1523	1530	1.75e-05	-4.75696	AGIQGPYT
TruePositive	ALP31164	1523	1530	1.75e-05	-4.75696	AGIQGPYT
TruePositive	ANJ61585	1523	1530	1.75e-05	-4.75696	AGIQGPYT
TruePositive	ALP31084	1523	1530	1.75e-05	-4.75696	AGIQGPYT
TruePositive	APU51947	1523	1530	1.75e-05	-4.75696	AGIQGPYT
TruePositive	ALP31128	1523	1530	1.75e-05	-4.75696	AGIQGPYT
TruePositive	ALP31168	1523	1530	1.75e-05	-4.75696	AGIQGPYT
TruePositive	QCE20697	1523	1530	1.75e-05	-4.75696	AGIQGPYT
TruePositive	ALP31180	1523	1530	1.75e-05	-4.75696	AGIQGPYT
TruePositive	AKU75603	1523	1530	1.75e-05	-4.75696	AGIQGPYT
TruePositive	QEG13927	1523	1530	1.75e-05	-4.75696	AGIQGPYT
TruePositive	ALP31106	1523	1530	1.75e-05	-4.75696	AGIQGPYT
TruePositive	AKU75638	1523	1530	1.75e-05	-4.75696	AGIQGPYT
TruePositive	BAW35420	1523	1530	1.75e-05	-4.75696	AGIQGPYT
TruePositive	AKT07950	1523	1530	1.75e-05	-4.75696	AGIQGPYT
TruePositive	APU51953	1523	1530	1.75e-05	-4.75696	AGIQGPYT
TruePositive	ANN46833	1523	1530	1.75e-05	-4.75696	AGIQGPYT
TruePositive	QEG13936	1523	1530	1.75e-05	-4.75696	AGIQGPYT
TruePositive	ANJ61543	1523	1530	1.75e-05	-4.75696	AGIQGPYT
TruePositive	QCE20703	1523	1530	1.75e-05	-4.75696	AGIQGPYT
TruePositive	ALP31174	1523	1530	1.75e-05	-4.75696	AGIQGPYT
TruePositive	ANN46834	1523	1530	1.75e-05	-4.75696	AGIQGPYT
TruePositive	ANJ61599	1523	1530	1.75e-05	-4.75696	AGIQGPYT
TruePositive	ANZ79243	1523	1530	1.75e-05	-4.75696	AGIQGPYT
TruePositive	ANJ61721	1523	1530	1.75e-05	-4.75696	AGIQGPYT
TruePositive	ANJ61566	1523	1530	1.75e-05	-4.75696	AGIQGPYT
TruePositive	AKU75591	1523	1530	1.75e-05	-4.75696	AGIQGPYT
TruePositive	ALP31131	1523	1530	1.75e-05	-4.75696	AGIQGPYT
TruePositive	ALP31170	1523	1530	1.75e-05	-4.75696	AGIQGPYT
TruePositive	EV68polyprotein	1523	1530	1.75e-05	-4.75696	AGIQGPYT
TruePositive	AKU75624	1523	1530	1.75e-05	-4.75696	AGIQGPYT
TruePositive	ALP31126	1523	1530	1.75e-05	-4.75696	AGIQGPYT
TruePositive	AYW17087	1524	1531	1.75e-05	-4.75696	AGIQGPYT
TruePositive	AWW21315	1524	1531	1.75e-05	-4.75696	AGIQGPYT
TruePositive	AYW17098	1524	1531	1.75e-05	-4.75696	AGIQGPYT
TruePositive	AKT08835	1524	1531	1.75e-05	-4.75696	AGIQGPYT
TruePositive	AWW21320	1524	1531	1.75e-05	-4.75696	AGIQGPYT
TruePositive	AIS73057	1524	1531	1.75e-05	-4.75696	AGIQGPYT
TruePositive	AWW21316	1524	1531	1.75e-05	-4.75696	AGIQGPYT
TruePositive	AWW21321	1524	1531	1.75e-05	-4.75696	AGIQGPYT
TruePositive	AKQ44193	1524	1531	1.75e-05	-4.75696	AGIQGPYT
TruePositive	AIA24394	1524	1531	1.75e-05	-4.75696	AGIQGPYT
TruePositive	AWW21318	1524	1531	1.75e-05	-4.75696	AGIQGPYT
TruePositive	AKQ44194	1524	1531	1.75e-05	-4.75696	AGIQGPYT
TruePositive	AYW17091	1524	1531	1.75e-05	-4.75696	AGIQGPYT
TruePositive	ANG56888	1524	1531	1.75e-05	-4.75696	AGIQGPYT
TruePositive	AYW17085	1524	1531	1.75e-05	-4.75696	AGIQGPYT
TruePositive	AWW21319	1524	1531	1.75e-05	-4.75696	AGIQGPYT
TruePositive	AWW21317	1524	1531	1.75e-05	-4.75696	AGIQGPYT
TruePositive	AWW21314	1524	1531	1.75e-05	-4.75696	AGIQGPYT
TruePositive	AYW17095	1524	1531	1.75e-05	-4.75696	AGIQGPYT
TruePositive	AKT08826	1524	1531	1.75e-05	-4.75696	AGIQGPYT
TruePositive	ALT66861	1524	1531	1.75e-05	-4.75696	AGIQGPYT
TruePositive	AWW21313	1524	1531	1.75e-05	-4.75696	AGIQGPYT
TruePositive	AYW17096	1524	1531	1.75e-05	-4.75696	AGIQGPYT
TruePositive	AYW17088	1524	1531	1.75e-05	-4.75696	AGIQGPYT
TruePositive	AYW17086	1524	1531	1.75e-05	-4.75696	AGIQGPYT
TruePositive	ABL61316	1525	1532	1.75e-05	-4.75696	AGIQGPYT
TruePositive	NP_040760	1529	1536	1.75e-05	-4.75696	AGIQGPYT
TruePositive	NP_040760	1529	1536	1.75e-05	-4.75696	AGIQGPYT
TruePositive	ABA43708	1529	1536	1.75e-05	-4.75696	AGIQGPYT
TruePositive	BAA18891	1529	1536	1.75e-05	-4.75696	AGIQGPYT
TruePositive	ACX85865	1537	1544	1.75e-05	-4.75696	AGHQGAYT
TruePositive	AIB00608	1537	1544	1.75e-05	-4.75696	AGHQGAYT
TruePositive	AUD09241	1537	1544	1.75e-05	-4.75696	AGHQGAYT
TruePositive	ACX85866	1537	1544	1.75e-05	-4.75696	AGHQGAYT
TruePositive	AIB00627	1537	1544	1.75e-05	-4.75696	AGHQGAYT
TruePositive	AUD09242	1537	1544	1.75e-05	-4.75696	AGHQGAYT
TruePositive	AUO29154	1537	1544	1.75e-05	-4.75696	AGHQGAYT
TruePositive	ACX85861	1537	1544	1.75e-05	-4.75696	AGHQGAYT
TruePositive	AUD08520	1537	1544	1.75e-05	-4.75696	AGHQGAYT
TruePositive	AIB00584	1537	1544	1.75e-05	-4.75696	AGHQGAYT
TruePositive	AUD09276	1537	1544	1.75e-05	-4.75696	AGHQGAYT
TruePositive	AUD09256	1537	1544	1.75e-05	-4.75696	AGHQGAYT
TruePositive	AIB00619	1537	1544	1.75e-05	-4.75696	AGHQGAYT
TruePositive	AIB00631	1537	1544	1.75e-05	-4.75696	AGHQGAYT
TruePositive	ACX85860	1537	1544	1.75e-05	-4.75696	AGHQGAYT
TruePositive	ACX85863	1537	1544	1.75e-05	-4.75696	AGHQGAYT
TruePositive	ACX85867	1537	1544	1.75e-05	-4.75696	AGHQGAYT
TruePositive	AIB00588	1537	1544	1.75e-05	-4.75696	AGHQGAYT
TruePositive	AUD09247	1537	1544	1.75e-05	-4.75696	AGHQGAYT
TruePositive	AIB00579	1537	1544	1.75e-05	-4.75696	AGHQGAYT
TruePositive	AUD09292	1537	1544	1.75e-05	-4.75696	AGHQGAYT
TruePositive	AUD09237	1537	1544	1.75e-05	-4.75696	AGHQGAYT
TruePositive	AIB00621	1537	1544	1.75e-05	-4.75696	AGHQGAYT
TruePositive	CAC07403	1537	1544	1.75e-05	-4.75696	AGHQGAYT
TruePositive	AUD09239	1537	1544	1.75e-05	-4.75696	AGHQGAYT
TruePositive	AUD09268	1537	1544	1.75e-05	-4.75696	AGHQGAYT
TruePositive	AUD09290	1537	1544	1.75e-05	-4.75696	AGHQGAYT
TruePositive	AIB00633	1537	1544	1.75e-05	-4.75696	AGHQGAYT
TruePositive	AIB00622	1537	1544	1.75e-05	-4.75696	AGHQGAYT
TruePositive	CAA25444	1537	1544	1.75e-05	-4.75696	AGHQGAYT
TruePositive	AIB00620	1537	1544	1.75e-05	-4.75696	AGHQGAYT
TruePositive	AUD09275	1537	1544	1.75e-05	-4.75696	AGHQGAYT
TruePositive	AIB00630	1537	1544	1.75e-05	-4.75696	AGHQGAYT
TruePositive	AIB00623	1537	1544	1.75e-05	-4.75696	AGHQGAYT
TruePositive	AGW83680	1537	1544	1.75e-05	-4.75696	AGHQGAYT
TruePositive	BAE20392	1537	1544	1.75e-05	-4.75696	AGHQGAYT
TruePositive	AUD09243	1537	1544	1.75e-05	-4.75696	AGHQGAYT
TruePositive	AIB00532	1537	1544	1.75e-05	-4.75696	AGHQGAYT
TruePositive	AUD09258	1537	1544	1.75e-05	-4.75696	AGHQGAYT
TruePositive	AUD09280	1537	1544	1.75e-05	-4.75696	AGHQGAYT
TruePositive	AAO59382	1537	1544	1.75e-05	-4.75696	AGHQGAYT
TruePositive	AUD09259	1537	1544	1.75e-05	-4.75696	AGHQGAYT
TruePositive	AIB00624	1537	1544	1.75e-05	-4.75696	AGHQGAYT
TruePositive	ACZ13359	1537	1544	1.75e-05	-4.75696	AGHQGAYT
TruePositive	AUD09229	1537	1544	1.75e-05	-4.75696	AGHQGAYT
TruePositive	ALI31820	1537	1544	1.75e-05	-4.75696	AGHQGAYT
TruePositive	AUF49621	1537	1544	1.75e-05	-4.75696	AGHQGAYT
TruePositive	AVE14262	1537	1544	1.75e-05	-4.75696	AGHQGAYT
TruePositive	ACX85862	1537	1544	1.75e-05	-4.75696	AGHQGAYT
TruePositive	ACX85868	1537	1544	1.75e-05	-4.75696	AGHQGAYT
TruePositive	AIB00583	1537	1544	1.75e-05	-4.75696	AGHQGAYT
TruePositive	ADU20413	1537	1544	1.75e-05	-4.75696	AGHQGAYT
TruePositive	AAN85444	1537	1544	1.75e-05	-4.75696	AGHQGAYT
TruePositive	AIB00593	1537	1544	1.75e-05	-4.75696	AGHQGAYT
TruePositive	AAA46914	1537	1544	1.75e-05	-4.75696	AGHQGAYT
TruePositive	AUD08521	1537	1544	1.75e-05	-4.75696	AGHQGAYT
TruePositive	ACZ28902	1537	1544	1.75e-05	-4.75696	AGHQGAYT
TruePositive	AUD09266	1537	1544	1.75e-05	-4.75696	AGHQGAYT
TruePositive	AUD09240	1537	1544	1.75e-05	-4.75696	AGHQGAYT
TruePositive	AUD09225	1537	1544	1.75e-05	-4.75696	AGHQGAYT
TruePositive	AUD09272	1537	1544	1.75e-05	-4.75696	AGHQGAYT
TruePositive	AIB00632	1537	1544	1.75e-05	-4.75696	AGHQGAYT
TruePositive	AIB00618	1537	1544	1.75e-05	-4.75696	AGHQGAYT
TruePositive	ADO22688	1537	1544	1.75e-05	-4.75696	AGHQGAYT
TruePositive	AIB00617	1537	1544	1.75e-05	-4.75696	AGHQGAYT
TruePositive	AUO29158	1537	1544	1.75e-05	-4.75696	AGHQGAYT
TruePositive	AUD09291	1537	1544	1.75e-05	-4.75696	AGHQGAYT
TruePositive	ACZ28901	1537	1544	1.75e-05	-4.75696	AGHQGAYT
TruePositive	AIB00629	1537	1544	1.75e-05	-4.75696	AGHQGAYT
TruePositive	AUD09281	1537	1544	1.75e-05	-4.75696	AGHQGAYT
TruePositive	ACX85864	1537	1544	1.75e-05	-4.75696	AGHQGAYT
TruePositive	AUD09249	1537	1544	1.75e-05	-4.75696	AGHQGAYT
TruePositive	ADA84545	1537	1544	1.75e-05	-4.75696	AGHQGAYT
TruePositive	AIB00616	1537	1544	1.75e-05	-4.75696	AGHQGAYT
TruePositive	AIB00625	1537	1544	1.75e-05	-4.75696	AGHQGAYT
TruePositive	AMN38451	1537	1544	1.75e-05	-4.75696	AGHQGAYT
TruePositive	CAA28155	1537	1544	1.75e-05	-4.75696	AGHQGAYT
TruePositive	AIB00615	1537	1544	1.75e-05	-4.75696	AGHQGAYT
TruePositive	ACX85869	1537	1544	1.75e-05	-4.75696	AGHQGAYT
TruePositive	AIB00598	1537	1544	1.75e-05	-4.75696	AGHQGAYT
TruePositive	ACS34685	1537	1544	1.75e-05	-4.75696	AGHQGAYT
TruePositive	ACS34686	1537	1544	1.75e-05	-4.75696	AGHQGAYT
TruePositive	AUD09228	1537	1544	1.75e-05	-4.75696	AGHQGAYT
TruePositive	AUD09265	1537	1544	1.75e-05	-4.75696	AGHQGAYT
TruePositive	AUD09246	1537	1544	1.75e-05	-4.75696	AGHQGAYT
TruePositive	AUD09245	1537	1544	1.75e-05	-4.75696	AGHQGAYT
TruePositive	AUD09264	1537	1544	1.75e-05	-4.75696	AGHQGAYT
TruePositive	AUD09279	1537	1544	1.75e-05	-4.75696	AGHQGAYT
TruePositive	AAN85443	1538	1545	1.75e-05	-4.75696	AGHQGAYT
TruePositive	ACN78837	1538	1545	1.75e-05	-4.75696	AGHQGAYT
TruePositive	AGA12462	1538	1545	1.75e-05	-4.75696	AGHQGAYT
TruePositive	AIA58176	1538	1545	1.75e-05	-4.75696	AGHQGAYT
TruePositive	ADR82076	1538	1545	1.75e-05	-4.75696	AGHQGAYT
TruePositive	AIB00514	1538	1545	1.75e-05	-4.75696	AGHQGAYT
TruePositive	AUD09273	1538	1545	1.75e-05	-4.75696	AGHQGAYT
TruePositive	ABM54538	1538	1545	1.75e-05	-4.75696	AGHQGAYT
TruePositive	BAA00516	1538	1545	1.75e-05	-4.75696	AGHQGAYT
TruePositive	CAJ29002	1538	1545	1.75e-05	-4.75696	AGHQGAYT
TruePositive	ABK20868	1538	1545	1.75e-05	-4.75696	AGHQGAYT
TruePositive	AAP68876	1538	1545	1.75e-05	-4.75696	AGHQGAYT
TruePositive	ACD78137	1538	1545	1.75e-05	-4.75696	AGHQGAYT
TruePositive	CAD67522	1538	1545	1.75e-05	-4.75696	AGHQGAYT
TruePositive	AIB00515	1538	1545	1.75e-05	-4.75696	AGHQGAYT
TruePositive	ACS34682	1538	1545	1.75e-05	-4.75696	AGHQGAYT
TruePositive	AGA12392	1538	1545	1.75e-05	-4.75696	AGHQGAYT
TruePositive	AUD09261	1538	1545	1.75e-05	-4.75696	AGHQGAYT
TruePositive	AGA12376	1538	1545	1.75e-05	-4.75696	AGHQGAYT
TruePositive	AUD09253	1538	1545	1.75e-05	-4.75696	AGHQGAYT
TruePositive	AUD09284	1538	1545	1.75e-05	-4.75696	AGHQGAYT
TruePositive	ANQ44599	1538	1545	1.75e-05	-4.75696	AGHQGAYT
TruePositive	AAX85706	1538	1545	1.75e-05	-4.75696	AGHQGAYT
TruePositive	ANV28265	1538	1545	1.75e-05	-4.75696	AGHQGAYT
TruePositive	ACD78142	1538	1545	1.75e-05	-4.75696	AGHQGAYT
TruePositive	AGA12615	1538	1545	1.75e-05	-4.75696	AGHQGAYT
TruePositive	ACD78146	1538	1545	1.75e-05	-4.75696	AGHQGAYT
TruePositive	AIA58177	1538	1545	1.75e-05	-4.75696	AGHQGAYT
TruePositive	AUD09271	1538	1545	1.75e-05	-4.75696	AGHQGAYT
TruePositive	AGA12385	1538	1545	1.75e-05	-4.75696	AGHQGAYT
TruePositive	AHF48784	1538	1545	1.75e-05	-4.75696	AGHQGAYT
TruePositive	ANV28240	1538	1545	1.75e-05	-4.75696	AGHQGAYT
TruePositive	ABK20866	1538	1545	1.75e-05	-4.75696	AGHQGAYT
TruePositive	ANV28269	1538	1545	1.75e-05	-4.75696	AGHQGAYT
TruePositive	AGA12372	1538	1545	1.75e-05	-4.75696	AGHQGAYT
TruePositive	AUD09289	1538	1545	1.75e-05	-4.75696	AGHQGAYT
TruePositive	AGA12643	1538	1545	1.75e-05	-4.75696	AGHQGAYT
TruePositive	ABV00572	1538	1545	1.75e-05	-4.75696	AGHQGAYT
TruePositive	AUD09226	1538	1545	1.75e-05	-4.75696	AGHQGAYT
TruePositive	AUD09255	1538	1545	1.75e-05	-4.75696	AGHQGAYT
TruePositive	AIB00527	1538	1545	1.75e-05	-4.75696	AGHQGAYT
TruePositive	ACD78144	1538	1545	1.75e-05	-4.75696	AGHQGAYT
TruePositive	AAO88056	1538	1545	1.75e-05	-4.75696	AGHQGAYT
TruePositive	AAP68875	1538	1545	1.75e-05	-4.75696	AGHQGAYT
TruePositive	AUD09267	1538	1545	1.75e-05	-4.75696	AGHQGAYT
TruePositive	ABM54540	1538	1545	1.75e-05	-4.75696	AGHQGAYT
TruePositive	ACS34683	1538	1545	1.75e-05	-4.75696	AGHQGAYT
TruePositive	ADV57679	1538	1545	1.75e-05	-4.75696	AGHQGAYT
TruePositive	ANV28243	1538	1545	1.75e-05	-4.75696	AGHQGAYT
TruePositive	AKC92706	1538	1545	1.75e-05	-4.75696	AGHQGAYT
TruePositive	AAO45820	1538	1545	1.75e-05	-4.75696	AGHQGAYT
TruePositive	ADR82077	1538	1545	1.75e-05	-4.75696	AGHQGAYT
TruePositive	ANV28242	1538	1545	1.75e-05	-4.75696	AGHQGAYT
TruePositive	AIB00529	1538	1545	1.75e-05	-4.75696	AGHQGAYT
TruePositive	ADR82079	1538	1545	1.75e-05	-4.75696	AGHQGAYT
TruePositive	AAA46912	1538	1545	1.75e-05	-4.75696	AGHQGAYT
TruePositive	AAQ04837	1538	1545	1.75e-05	-4.75696	AGHQGAYT
TruePositive	AGA12757	1538	1545	1.75e-05	-4.75696	AGHQGAYT
TruePositive	AIB00516	1538	1545	1.75e-05	-4.75696	AGHQGAYT
TruePositive	AUD08519	1538	1545	1.75e-05	-4.75696	AGHQGAYT
TruePositive	AGA12448	1538	1545	1.75e-05	-4.75696	AGHQGAYT
TruePositive	AAP37264	1538	1545	1.75e-05	-4.75696	AGHQGAYT
TruePositive	AIB00509	1538	1545	1.75e-05	-4.75696	AGHQGAYT
TruePositive	ACD78141	1538	1545	1.75e-05	-4.75696	AGHQGAYT
TruePositive	ALI31818	1538	1545	1.75e-05	-4.75696	AGHQGAYT
TruePositive	ANV28239	1538	1545	1.75e-05	-4.75696	AGHQGAYT
TruePositive	AUD09254	1538	1545	1.75e-05	-4.75696	AGHQGAYT
TruePositive	AGA12364	1538	1545	1.75e-05	-4.75696	AGHQGAYT
TruePositive	AUD09263	1538	1545	1.75e-05	-4.75696	AGHQGAYT
TruePositive	AUD09260	1538	1545	1.75e-05	-4.75696	AGHQGAYT
TruePositive	ACD78133	1538	1545	1.75e-05	-4.75696	AGHQGAYT
TruePositive	AUD09274	1538	1545	1.75e-05	-4.75696	AGHQGAYT
TruePositive	ABM54529	1538	1545	1.75e-05	-4.75696	AGHQGAYT
TruePositive	AGA12361	1538	1545	1.75e-05	-4.75696	AGHQGAYT
TruePositive	AGA12358	1538	1545	1.75e-05	-4.75696	AGHQGAYT
TruePositive	ACS34684	1538	1545	1.75e-05	-4.75696	AGHQGAYT
TruePositive	AAP37262	1538	1545	1.75e-05	-4.75696	AGHQGAYT
TruePositive	ACX53673	1538	1545	1.75e-05	-4.75696	AGHQGAYT
TruePositive	ACD78135	1538	1545	1.75e-05	-4.75696	AGHQGAYT
TruePositive	AGA12368	1538	1545	1.75e-05	-4.75696	AGHQGAYT
TruePositive	AIB00525	1538	1545	1.75e-05	-4.75696	AGHQGAYT
TruePositive	AUD09282	1538	1545	1.75e-05	-4.75696	AGHQGAYT
TruePositive	ACN78836	1538	1545	1.75e-05	-4.75696	AGHQGAYT
TruePositive	ACD78149	1538	1545	1.75e-05	-4.75696	AGHQGAYT
TruePositive	ANV28238	1538	1545	1.75e-05	-4.75696	AGHQGAYT
TruePositive	ABM54541	1538	1545	1.75e-05	-4.75696	AGHQGAYT
TruePositive	ADR82078	1538	1545	1.75e-05	-4.75696	AGHQGAYT
TruePositive	AGW83677	1538	1545	1.75e-05	-4.75696	AGHQGAYT
TruePositive	CAJ01901	1538	1545	1.75e-05	-4.75696	AGHQGAYT
TruePositive	ALI31819	1538	1545	1.75e-05	-4.75696	AGHQGAYT
TruePositive	AIB00530	1538	1545	1.75e-05	-4.75696	AGHQGAYT
TruePositive	ABK20867	1538	1545	1.75e-05	-4.75696	AGHQGAYT
TruePositive	ANV28260	1538	1545	1.75e-05	-4.75696	AGHQGAYT
TruePositive	ANV28270	1538	1545	1.75e-05	-4.75696	AGHQGAYT
TruePositive	ACD78138	1538	1545	1.75e-05	-4.75696	AGHQGAYT
TruePositive	ABM54539	1538	1545	1.75e-05	-4.75696	AGHQGAYT
TruePositive	AUD09278	1538	1545	1.75e-05	-4.75696	AGHQGAYT
TruePositive	ACD78148	1538	1545	1.75e-05	-4.75696	AGHQGAYT
TruePositive	AUD09248	1538	1545	1.75e-05	-4.75696	AGHQGAYT
TruePositive	AUD09244	1538	1545	1.75e-05	-4.75696	AGHQGAYT
TruePositive	ACD78145	1538	1545	1.75e-05	-4.75696	AGHQGAYT
TruePositive	AIB00507	1538	1545	1.75e-05	-4.75696	AGHQGAYT
TruePositive	AMN38450	1538	1545	1.75e-05	-4.75696	AGHQGAYT
TruePositive	ABK20865	1538	1545	1.75e-05	-4.75696	AGHQGAYT
TruePositive	ABM54530	1538	1545	1.75e-05	-4.75696	AGHQGAYT
TruePositive	AIB00528	1538	1545	1.75e-05	-4.75696	AGHQGAYT
TruePositive	AUD09238	1538	1545	1.75e-05	-4.75696	AGHQGAYT
TruePositive	AIB00511	1538	1545	1.75e-05	-4.75696	AGHQGAYT
TruePositive	AGA12729	1538	1545	1.75e-05	-4.75696	AGHQGAYT
TruePositive	AGA12359	1538	1545	1.75e-05	-4.75696	AGHQGAYT
TruePositive	AAP37261	1538	1545	1.75e-05	-4.75696	AGHQGAYT
TruePositive	ACD78147	1538	1545	1.75e-05	-4.75696	AGHQGAYT
TruePositive	CAA25246	1538	1545	1.75e-05	-4.75696	AGHQGAYT
TruePositive	AUD09252	1538	1545	1.75e-05	-4.75696	AGHQGAYT
TruePositive	AUD09269	1538	1545	1.75e-05	-4.75696	AGHQGAYT
TruePositive	AUD09257	1538	1545	1.75e-05	-4.75696	AGHQGAYT
TruePositive	AUD09287	1538	1545	1.75e-05	-4.75696	AGHQGAYT
TruePositive	AIB00518	1538	1545	1.75e-05	-4.75696	AGHQGAYT
TruePositive	AGA12561	1538	1545	1.75e-05	-4.75696	AGHQGAYT
TruePositive	AUD09232	1538	1545	1.75e-05	-4.75696	AGHQGAYT
TruePositive	ACD78143	1538	1545	1.75e-05	-4.75696	AGHQGAYT
TruePositive	ACD78140	1538	1545	1.75e-05	-4.75696	AGHQGAYT
TruePositive	AIA58175	1538	1545	1.75e-05	-4.75696	AGHQGAYT
TruePositive	AUD09233	1538	1545	1.75e-05	-4.75696	AGHQGAYT
TruePositive	AIB00524	1538	1545	1.75e-05	-4.75696	AGHQGAYT
TruePositive	AIB00531	1538	1545	1.75e-05	-4.75696	AGHQGAYT
TruePositive	AIA58174	1538	1545	1.75e-05	-4.75696	AGHQGAYT
TruePositive	CAJ01904	1538	1545	1.75e-05	-4.75696	AGHQGAYT
TruePositive	AAP37263	1538	1545	1.75e-05	-4.75696	AGHQGAYT
TruePositive	AIA58173	1538	1545	1.75e-05	-4.75696	AGHQGAYT
TruePositive	AGA12539	1538	1545	1.75e-05	-4.75696	AGHQGAYT
TruePositive	AGW83676	1538	1545	1.75e-05	-4.75696	AGHQGAYT
TruePositive	CAP04369	1538	1545	1.75e-05	-4.75696	AGHQGAYT
TruePositive	CAJ01902	1538	1545	1.75e-05	-4.75696	AGHQGAYT
TruePositive	AAQ02682	1538	1545	1.75e-05	-4.75696	AGHQGAYT
TruePositive	AIB00523	1538	1545	1.75e-05	-4.75696	AGHQGAYT
TruePositive	AUD09262	1538	1545	1.75e-05	-4.75696	AGHQGAYT
TruePositive	AIT71004	1538	1545	1.75e-05	-4.75696	AGHQGAYT
TruePositive	AGA12409	1538	1545	1.75e-05	-4.75696	AGHQGAYT
TruePositive	CAJ01903	1538	1545	1.75e-05	-4.75696	AGHQGAYT
TruePositive	ANV28241	1538	1545	1.75e-05	-4.75696	AGHQGAYT
TruePositive	ACD78139	1538	1545	1.75e-05	-4.75696	AGHQGAYT
TruePositive	CAJ01900	1538	1545	1.75e-05	-4.75696	AGHQGAYT
TruePositive	ABM54522	1539	1546	1.75e-05	-4.75696	AGHQGAYT
TruePositive	ABM54524	1539	1546	1.75e-05	-4.75696	AGHQGAYT
TruePositive	ABM54526	1539	1546	1.75e-05	-4.75696	AGHQGAYT
TruePositive	ABM54527	1539	1546	1.75e-05	-4.75696	AGHQGAYT
TruePositive	CAA24446	1539	1546	1.75e-05	-4.75696	AGHQGAYT
TruePositive	ABC84488	1539	1546	1.75e-05	-4.75696	AGHQGAYT
TruePositive	ABM54523	1539	1546	1.75e-05	-4.75696	AGHQGAYT
TruePositive	AIB00482	1540	1547	1.75e-05	-4.75696	AGHQGAYT
TruePositive	AIB00442	1540	1547	1.75e-05	-4.75696	AGHQGAYT
TruePositive	AIB00393	1540	1547	1.75e-05	-4.75696	AGHQGAYT
TruePositive	AIB00401	1540	1547	1.75e-05	-4.75696	AGHQGAYT
TruePositive	ABV60428	1540	1547	1.75e-05	-4.75696	AGHQGAYT
TruePositive	AIB00432	1540	1547	1.75e-05	-4.75696	AGHQGAYT
TruePositive	AKJ87738	1540	1547	1.75e-05	-4.75696	AGHQGAYT
TruePositive	AIB00471	1540	1547	1.75e-05	-4.75696	AGHQGAYT
TruePositive	AAX23607	1540	1547	1.75e-05	-4.75696	AGHQGAYT
TruePositive	AAQ03188	1540	1547	1.75e-05	-4.75696	AGHQGAYT
TruePositive	ABV60429	1540	1547	1.75e-05	-4.75696	AGHQGAYT
TruePositive	AAQ03174	1540	1547	1.75e-05	-4.75696	AGHQGAYT
TruePositive	AAQ03184	1540	1547	1.75e-05	-4.75696	AGHQGAYT
TruePositive	AGS09854	1540	1547	1.75e-05	-4.75696	AGHQGAYT
TruePositive	ACS88252	1540	1547	1.75e-05	-4.75696	AGHQGAYT
TruePositive	AAS57685	1540	1547	1.75e-05	-4.75696	AGHQGAYT
TruePositive	AAQ03186	1540	1547	1.75e-05	-4.75696	AGHQGAYT
TruePositive	AIB00475	1540	1547	1.75e-05	-4.75696	AGHQGAYT
TruePositive	AAN85442	1540	1547	1.75e-05	-4.75696	AGHQGAYT
TruePositive	AIB00449	1540	1547	1.75e-05	-4.75696	AGHQGAYT
TruePositive	AAQ03179	1540	1547	1.75e-05	-4.75696	AGHQGAYT
TruePositive	AAQ03189	1540	1547	1.75e-05	-4.75696	AGHQGAYT
TruePositive	ACZ05039	1540	1547	1.75e-05	-4.75696	AGHQGAYT
TruePositive	AAQ03192	1540	1547	1.75e-05	-4.75696	AGHQGAYT
TruePositive	AAQ10894	1540	1547	1.75e-05	-4.75696	AGHQGAYT
TruePositive	AIB00451	1540	1547	1.75e-05	-4.75696	AGHQGAYT
TruePositive	AIB00465	1540	1547	1.75e-05	-4.75696	AGHQGAYT
TruePositive	NP_041277	1540	1547	1.75e-05	-4.75696	AGHQGAYT
TruePositive	ACS88253	1540	1547	1.75e-05	-4.75696	AGHQGAYT
TruePositive	AAQ03171	1540	1547	1.75e-05	-4.75696	AGHQGAYT
TruePositive	AAX23604	1540	1547	1.75e-05	-4.75696	AGHQGAYT
TruePositive	AIB00464	1540	1547	1.75e-05	-4.75696	AGHQGAYT
TruePositive	AET35055	1540	1547	1.75e-05	-4.75696	AGHQGAYT
TruePositive	ABV60418	1540	1547	1.75e-05	-4.75696	AGHQGAYT
TruePositive	AAM09805	1540	1547	1.75e-05	-4.75696	AGHQGAYT
TruePositive	AIB00487	1540	1547	1.75e-05	-4.75696	AGHQGAYT
TruePositive	AUD09270	1540	1547	1.75e-05	-4.75696	AGHQGAYT
TruePositive	AGS09863	1540	1547	1.75e-05	-4.75696	AGHQGAYT
TruePositive	AIB00488	1540	1547	1.75e-05	-4.75696	AGHQGAYT
TruePositive	AAP37265	1540	1547	1.75e-05	-4.75696	AGHQGAYT
TruePositive	ANA67900	1540	1547	1.75e-05	-4.75696	AGHQGAYT
TruePositive	ALI31817	1540	1547	1.75e-05	-4.75696	AGHQGAYT
TruePositive	AIB00472	1540	1547	1.75e-05	-4.75696	AGHQGAYT
TruePositive	AIB00412	1540	1547	1.75e-05	-4.75696	AGHQGAYT
TruePositive	AUD08522	1540	1547	1.75e-05	-4.75696	AGHQGAYT
TruePositive	AIB00486	1540	1547	1.75e-05	-4.75696	AGHQGAYT
TruePositive	AGS09865	1540	1547	1.75e-05	-4.75696	AGHQGAYT
TruePositive	AUD09231	1540	1547	1.75e-05	-4.75696	AGHQGAYT
TruePositive	ACS88255	1540	1547	1.75e-05	-4.75696	AGHQGAYT
TruePositive	ACS88250	1540	1547	1.75e-05	-4.75696	AGHQGAYT
TruePositive	AAQ10895	1540	1547	1.75e-05	-4.75696	AGHQGAYT
TruePositive	ACZ05037	1540	1547	1.75e-05	-4.75696	AGHQGAYT
TruePositive	AAQ03190	1540	1547	1.75e-05	-4.75696	AGHQGAYT
TruePositive	AMS03992	1540	1547	1.75e-05	-4.75696	AGHQGAYT
TruePositive	ANA67904	1540	1547	1.75e-05	-4.75696	AGHQGAYT
TruePositive	AGS09866	1540	1547	1.75e-05	-4.75696	AGHQGAYT
TruePositive	AIB00392	1540	1547	1.75e-05	-4.75696	AGHQGAYT
TruePositive	AAQ10897	1540	1547	1.75e-05	-4.75696	AGHQGAYT
TruePositive	AAG27146	1540	1547	1.75e-05	-4.75696	AGHQGAYT
TruePositive	AAQ03183	1540	1547	1.75e-05	-4.75696	AGHQGAYT
TruePositive	AIB00481	1540	1547	1.75e-05	-4.75696	AGHQGAYT
TruePositive	AAL75969	1540	1547	1.75e-05	-4.75696	AGHQGAYT
TruePositive	AGV79289	1540	1547	1.75e-05	-4.75696	AGHQGAYT
TruePositive	AGS09871	1540	1547	1.75e-05	-4.75696	AGHQGAYT
TruePositive	AHZ90136	1540	1547	1.75e-05	-4.75696	AGHQGAYT
TruePositive	AAQ03172	1540	1547	1.75e-05	-4.75696	AGHQGAYT
TruePositive	AIB00474	1540	1547	1.75e-05	-4.75696	AGHQGAYT
TruePositive	CAD23059	1540	1547	1.75e-05	-4.75696	AGHQGAYT
TruePositive	AGS09858	1540	1547	1.75e-05	-4.75696	AGHQGAYT
TruePositive	AAM09804	1540	1547	1.75e-05	-4.75696	AGHQGAYT
TruePositive	AUD09234	1540	1547	1.75e-05	-4.75696	AGHQGAYT
TruePositive	ANV28237	1540	1547	1.75e-05	-4.75696	AGHQGAYT
TruePositive	AIB00463	1540	1547	1.75e-05	-4.75696	AGHQGAYT
TruePositive	AIB00473	1540	1547	1.75e-05	-4.75696	AGHQGAYT
TruePositive	AAX23603	1540	1547	1.75e-05	-4.75696	AGHQGAYT
TruePositive	BAZ95883	1540	1547	1.75e-05	-4.75696	AGHQGAYT
TruePositive	ADB12452	1540	1547	1.75e-05	-4.75696	AGHQGAYT
TruePositive	AAG27166	1540	1547	1.75e-05	-4.75696	AGHQGAYT
TruePositive	AIB00479	1540	1547	1.75e-05	-4.75696	AGHQGAYT
TruePositive	ACZ05036	1540	1547	1.75e-05	-4.75696	AGHQGAYT
TruePositive	ANA67903	1540	1547	1.75e-05	-4.75696	AGHQGAYT
TruePositive	ACS88251	1540	1547	1.75e-05	-4.75696	AGHQGAYT
TruePositive	AGS09860	1540	1547	1.75e-05	-4.75696	AGHQGAYT
TruePositive	AIB00480	1540	1547	1.75e-05	-4.75696	AGHQGAYT
TruePositive	AAQ03187	1540	1547	1.75e-05	-4.75696	AGHQGAYT
TruePositive	AGS09864	1540	1547	1.75e-05	-4.75696	AGHQGAYT
TruePositive	ANV28235	1540	1547	1.75e-05	-4.75696	AGHQGAYT
TruePositive	AGS09859	1540	1547	1.75e-05	-4.75696	AGHQGAYT
TruePositive	AUD08518	1540	1547	1.75e-05	-4.75696	AGHQGAYT
TruePositive	AIB00448	1540	1547	1.75e-05	-4.75696	AGHQGAYT
TruePositive	AAQ03175	1540	1547	1.75e-05	-4.75696	AGHQGAYT
TruePositive	AGS09869	1540	1547	1.75e-05	-4.75696	AGHQGAYT
TruePositive	AGS09857	1540	1547	1.75e-05	-4.75696	AGHQGAYT
TruePositive	ANA67901	1540	1547	1.75e-05	-4.75696	AGHQGAYT
TruePositive	BAD72854	1540	1547	1.75e-05	-4.75696	AGHQGAYT
TruePositive	AIB00485	1540	1547	1.75e-05	-4.75696	AGHQGAYT
TruePositive	AIB00460	1540	1547	1.75e-05	-4.75696	AGHQGAYT
TruePositive	AUD09227	1540	1547	1.75e-05	-4.75696	AGHQGAYT
TruePositive	AHZ90137	1540	1547	1.75e-05	-4.75696	AGHQGAYT
TruePositive	AIB00437	1540	1547	1.75e-05	-4.75696	AGHQGAYT
TruePositive	AAL75970	1540	1547	1.75e-05	-4.75696	AGHQGAYT
TruePositive	AIB00484	1540	1547	1.75e-05	-4.75696	AGHQGAYT
TruePositive	AAQ03178	1540	1547	1.75e-05	-4.75696	AGHQGAYT
TruePositive	AIB00468	1540	1547	1.75e-05	-4.75696	AGHQGAYT
[truncated: 18,886 more rows]

## Sheet: SF4B. False Positives
Supplemental File 4B. Optimized 3C cleavage motif scores for False Positive hits within enteroviral polyprotein dataset
MatchType	sequence_name	start_pos	stop_pos	p-value	log10_p-val	matched_sequence
FalsePositive	AUF49651	886	893	9.88e-08	-7.00524	ADWQGCVW
FalsePositive	AAL69631	931	938	6.89e-06	-5.16178	AYFQGPGI
FalsePositive	AMB57005	877	884	1.07e-05	-4.97062	ADWQNCIW
FalsePositive	ACK37404	142	149	1.16e-05	-4.93554	PTSQGWWW
FalsePositive	ACK37385	142	149	1.19e-05	-4.92445	NSSQGWWW
FalsePositive	AHK12885	1477	1484	2e-05	-4.69897	ARDQGWII
FalsePositive	AKL88020	875	882	2.1e-05	-4.67778	ADWQNCVW
FalsePositive	AAV41051	1477	1484	3.56e-05	-4.44855	CRHQGWII
FalsePositive	ARU09503	1485	1492	3.83e-05	-4.4168	CRDQGWIM
FalsePositive	ALB72987	1477	1484	4.11e-05	-4.38616	CMDQGWII
FalsePositive	NP_653149	942	949	4.72e-05	-4.32606	VCFQGPGI
FalsePositive	AFV83532	142	149	4.83e-05	-4.31605	KNSQGWWW
FalsePositive	ACK37410	142	149	5.17e-05	-4.28651	STSQGWWW
FalsePositive	ACK37431	142	149	5.41e-05	-4.2668	GTSQGWWW
FalsePositive	APR72754	874	881	6.04e-05	-4.21896	ADWQSCVW
FalsePositive	ABO69371	1012	1019	6.73e-05	-4.17198	AFGQGFMS
FalsePositive	ACV51798	140	147	6.88e-05	-4.16241	GGSQGWWW
FalsePositive	AKD28015	877	884	7.33e-05	-4.1349	EDWQGCVW
FalsePositive	APT69822	140	147	7.48e-05	-4.1261	GSSQGWWW
FalsePositive	ADM83417	142	149	7.64e-05	-4.11691	KESQGWWW
FalsePositive	AAX47036	142	149	7.96e-05	-4.09909	ETSQGWWW
FalsePositive	YP_003358790	920	927	9.55e-05	-4.02	VCFQGPGL
FalsePositive	AIA21703	961	968	9.74e-05	-4.01144	AGGQGVVC
FalsePositive	ACU00185	1435	1442	0.000103	-3.98716	CVEQGWMG
FalsePositive	ACK37398	1446	1453	0.000103	-3.98716	KYCQGNNW
FalsePositive	AFO64932	1164	1171	0.000112	-3.95078	APSQGDQE
FalsePositive	AFN53722	1485	1492	0.000114	-3.9431	CRNQGWII
FalsePositive	AFO83469	142	149	0.000116	-3.93554	TESQGRWW
FalsePositive	ACT31465	1502	1509	0.000116	-3.93554	CKQQGWIV
FalsePositive	AAR38841	1473	1480	0.000121	-3.91721	CREQGWII
FalsePositive	AHV82109	1477	1484	0.000128	-3.89279	CREQGWIV
FalsePositive	AEO51785	41	48	0.00013	-3.88606	ASKQGFSQ
FalsePositive	ABF51201	742	749	0.000132	-3.87943	FWQQGQPY
FalsePositive	ACK37420	202	209	0.000135	-3.86967	ASHQGGNV
FalsePositive	AQM32742	1339	1346	0.000135	-3.86967	CRDQGWII
FalsePositive	AJO54282	1439	1446	0.000135	-3.86967	CNEQGWIG
FalsePositive	AAS86317	1448	1455	0.00014	-3.85387	CRTQGWIV
FalsePositive	AFN65690	1477	1484	0.00014	-3.85387	CKEQGWII
FalsePositive	ABF51184	1461	1468	0.000143	-3.84466	QYCQGKKW
FalsePositive	AAR38846	1473	1480	0.000143	-3.84466	CRDQGWIV
FalsePositive	AAQ73086	886	893	0.000148	-3.82974	VDWQNCIW
FalsePositive	AFR77803	908	915	0.000154	-3.81248	VCAQGCDT
FalsePositive	AAD22046	1477	1484	0.000154	-3.81248	CRVQGWIV
FalsePositive	ACU00187	740	747	0.000156	-3.80688	FWQQGQPF
FalsePositive	APZ85757	884	891	0.000156	-3.80688	NDWQNCIW
FalsePositive	AUF49666	1474	1481	0.000156	-3.80688	CKDQGWII
FalsePositive	AFR77805	907	914	0.000168	-3.77469	VCAQGCDI
FalsePositive	APX43287	228	235	0.000177	-3.75203	ASTQGVQT
FalsePositive	ALB72978	1477	1484	0.000177	-3.75203	CREQGCII
FalsePositive	ACN59569	41	48	0.000183	-3.73755	AGKQGLKQ
FalsePositive	AFQ55938	1487	1494	0.000183	-3.73755	CKQQGWVV
FalsePositive	ADW78250	1904	1911	0.000183	-3.73755	AFHQNPGT
FalsePositive	AAX47044	204	211	0.000187	-3.72816	ADVQGVVT
FalsePositive	AEC13061	1477	1484	0.000187	-3.72816	CSEQGWII
FalsePositive	ACD78149	41	48	0.000193	-3.71444	ASKQGFSP
FalsePositive	ABF51198	703	710	0.000197	-3.70553	AAAQGDDT
FalsePositive	ACK37392	1902	1909	0.0002	-3.69897	AFHQNPGI
FalsePositive	ABK41189	883	890	0.000204	-3.69037	TDWQNCIW
FalsePositive	AEL31293	1442	1449	0.000204	-3.69037	CVEQGWIG
FalsePositive	ACK37398	703	710	0.000211	-3.67572	AAAQGEDN
FalsePositive	ABO69379	1915	1922	0.000211	-3.67572	AFHQNPGV
FalsePositive	ABF51199	707	714	0.000214	-3.66959	AAVQGDDS
FalsePositive	YP_009028564	527	534	0.000222	-3.65365	APTQGSII
FalsePositive	ADK22846	1489	1496	0.000222	-3.65365	CTKQGWVT
FalsePositive	ABF51201	702	709	0.000225	-3.64782	ASKQGNNG
FalsePositive	ACV51798	136	143	0.000229	-3.64016	VNWQGGSQ
FalsePositive	CAA29172	875	882	0.000229	-3.64016	VDWQNCVW
FalsePositive	ADW78250	909	916	0.000233	-3.63264	VTFQGPGI
FalsePositive	AHK24839	1435	1442	0.000237	-3.62525	CAEQGWIG
FalsePositive	APT69836	742	749	0.000241	-3.61798	FWQQGQTY
FalsePositive	ADD23216	875	882	0.000241	-3.61798	NDWQNCVW
FalsePositive	AEI99577	1713	1720	0.000241	-3.61798	NGRQGFWP
FalsePositive	AAQ73093	185	192	0.000279	-3.5544	RFHQGCLM
FalsePositive	ACK37432	705	712	0.000279	-3.5544	AAAQGNDI
FalsePositive	AFV92902	1489	1496	0.000279	-3.5544	CAKQGWVT
FalsePositive	AAV41051	937	944	0.000297	-3.52724	VSFQGPGI
FalsePositive	ABF51197	705	712	0.000302	-3.51999	AAAQGNGI
FalsePositive	AAX47037	875	882	0.000307	-3.51286	TDWQNCVW
FalsePositive	AEL31289	1436	1443	0.000307	-3.51286	CVEQGWVG
FalsePositive	AGA18497	1489	1496	0.000307	-3.51286	CKGQGWVT
FalsePositive	AUF49648	895	902	0.000311	-3.50724	VDWQSCIW
FalsePositive	AJF23329	185	192	0.000321	-3.49349	KFHQGCLM
FalsePositive	AEL31293	888	895	0.000326	-3.48678	CTAQGPDR
FalsePositive	ALB72976	907	914	0.000326	-3.48678	TTAQGCDM
FalsePositive	APT69825	685	692	0.000331	-3.48017	TNNQGLMQ
FalsePositive	AUO29150	877	884	0.000337	-3.47237	HDWQNCVW
FalsePositive	AHY03306	770	777	0.000352	-3.45346	FNQQGPYG
FalsePositive	AAA45762	707	714	0.000358	-3.44612	AAAQGNDS
FalsePositive	ACK37409	404	411	0.000375	-3.42597	PNRQGEMV
FalsePositive	YP_001552411	1431	1438	0.000375	-3.42597	CQDQGYIS
FalsePositive	AAQ73085	532	539	0.000386	-3.41341	AHAQSACY
FalsePositive	AGV98964	1178	1185	0.000398	-3.40012	AASQGDLE
FalsePositive	APT69824	502	509	0.000404	-3.39362	WIAQGYYR
FalsePositive	ACR14890	501	508	0.00041	-3.38722	WISQGYYR
FalsePositive	ALB75014	851	858	0.00041	-3.38722	TIEQGEHR
FalsePositive	ACK37413	894	901	0.000422	-3.37469	TNTQGDDY
FalsePositive	AFO64932	874	881	0.000429	-3.36754	FDWQNCIW
FalsePositive	AAV41051	908	915	0.000435	-3.36151	VNAQGCDT
FalsePositive	ALB73004	1721	1728	0.000442	-3.35458	NGHQGFST
FalsePositive	APT69821	652	659	0.000455	-3.34199	NMKQGYAV
FalsePositive	AIT57557	974	981	0.000455	-3.34199	ARYQSHMT
FalsePositive	ARC95292	961	968	0.000462	-3.33536	AGGQGVVG
FalsePositive	ABF51184	202	209	0.000475	-3.32331	ASIQGGSV
FalsePositive	AAD46138	879	886	0.000475	-3.32331	IDWQNCVW
FalsePositive	AIA21703	1042	1049	0.000475	-3.32331	TRSQGDMP
FalsePositive	AJO54281	652	659	0.000482	-3.31695	ALDQGFLK
FalsePositive	ANZ02994	921	928	0.000489	-3.31069	VSFQGPGL
FalsePositive	ACU45381	954	961	0.000489	-3.31069	ARHQSHLM
FalsePositive	AGX93075	974	981	0.000489	-3.31069	ARYQSHMI
FalsePositive	ABM54518	1190	1197	0.000489	-3.31069	AIHQSCPS
FalsePositive	AQM32742	1575	1582	0.000489	-3.31069	NGRQGFCA
FalsePositive	AAQ73078	386	393	0.000497	-3.30364	NNTQGHLQ
FalsePositive	ATV91618	877	884	0.000497	-3.30364	YDWQNCVW
FalsePositive	ALB72926	1285	1292	0.000497	-3.30364	ALCQNPDG
FalsePositive	YP_009353025	185	192	0.000526	-3.27901	KFHQGCLF
FalsePositive	BAA00426	1292	1299	0.000534	-3.27246	YKQQGYDM
FalsePositive	ABV25903	1707	1714	0.000534	-3.27246	NGKQGFCA
FalsePositive	ABF51181	534	541	0.000542	-3.266	PQTQGQVY
FalsePositive	AUF49672	696	703	0.000542	-3.266	YQHQGTIN
FalsePositive	ARU09503	915	922	0.000542	-3.266	TTTQGCDT
FalsePositive	AKA64452	879	886	0.00055	-3.25964	VDAQGCDV
FalsePositive	ABU62849	535	542	0.000566	-3.24718	AIAQGSIL
FalsePositive	AGA18499	1190	1197	0.000566	-3.24718	CPSQGEQE
FalsePositive	ALB72980	907	914	0.000574	-3.24109	TTVQGCDP
FalsePositive	ACU00185	881	888	0.000582	-3.23508	SATQGPDH
FalsePositive	AAQ73094	185	192	0.000591	-3.22841	KFHQGCIL
FalsePositive	ANY27029	875	882	0.000591	-3.22841	TDWQSCVW
FalsePositive	AFR77805	936	943	0.000599	-3.22257	ISFQGPGI
FalsePositive	APT69848	875	882	0.000617	-3.20971	FDWQNCVW
FalsePositive	ACK37368	402	409	0.000625	-3.20412	QNMQGEQV
FalsePositive	AFC75700	907	914	0.000625	-3.20412	TPAQGCDT
FalsePositive	AGC54436	1702	1709	0.000625	-3.20412	NGHQGFSA
FalsePositive	ANZ02994	160	167	0.000634	-3.19791	VFGQNCWY
FalsePositive	AAQ73076	694	701	0.000634	-3.19791	NKRQGAPV
FalsePositive	ACK37386	463	470	0.000653	-3.18509	PGAQGPIK
FalsePositive	YP_009344963	865	872	0.000653	-3.18509	VDWQNLVW
FalsePositive	ACK37380	944	951	0.000653	-3.18509	RYQQGVMR
FalsePositive	AMB19798	1591	1598	0.000662	-3.17914	RDWQGMRL
FalsePositive	AAQ73076	138	145	0.000671	-3.17328	VEWQGSSA
FalsePositive	ABO69379	465	472	0.000671	-3.17328	PGAQGPTN
FalsePositive	CAA63480	696	703	0.000671	-3.17328	YQHQGSIN
FalsePositive	APQ46501	894	901	0.000681	-3.16685	TSTQGDDY
FalsePositive	ACK37412	387	394	0.000691	-3.16052	NNVQGNKN
FalsePositive	APW91136	532	539	0.00071	-3.14874	ASTQNKCY
FalsePositive	ABF51190	765	772	0.00071	-3.14874	YNEQGQNY
FalsePositive	AFO12666	210	217	0.00072	-3.14267	PNGQGLYP
FalsePositive	AUN27637	357	364	0.00072	-3.14267	IHIQGEVR
FalsePositive	ACI23463	874	881	0.00072	-3.14267	SDWQNCVW
FalsePositive	ALB72959	915	922	0.00072	-3.14267	TTAQGCDP
FalsePositive	ACK37430	945	952	0.00072	-3.14267	RYQQGVMK
FalsePositive	ACK37388	1048	1055	0.00072	-3.14267	VRSQGDPA
FalsePositive	AFV92902	1681	1688	0.00072	-3.14267	VTEQGMLN
FalsePositive	NP_758520	1689	1696	0.00072	-3.14267	NGAQGFCA
FalsePositive	ALB72944	210	217	0.000731	-3.13608	TNGQGLYP
FalsePositive	AQM32742	769	776	0.000731	-3.13608	TTAQGCDT
FalsePositive	AAR38840	904	911	0.000731	-3.13608	TTGQGCDT
FalsePositive	AQM32742	816	823	0.000741	-3.13018	ARYQSHLM
FalsePositive	ATG80398	875	882	0.000741	-3.13018	GDWQNCVW
FalsePositive	AAQ73076	880	887	0.000741	-3.13018	DDWQNCVW
FalsePositive	AEL31292	136	143	0.000751	-3.12436	VTWQGGSL
FalsePositive	AHD24522	216	223	0.000751	-3.12436	PGEQGHRI
FalsePositive	AUO29152	405	412	0.000751	-3.12436	GNHQGDKI
FalsePositive	ABF51180	404	411	0.000762	-3.11805	ANRQNDQI
FalsePositive	ACK37417	469	476	0.000762	-3.11805	PGAQGPTT
FalsePositive	AEO51781	978	985	0.000773	-3.11182	ARYQSHIT
FalsePositive	AFQ55937	1679	1686	0.000773	-3.11182	VVEQGMLN
FalsePositive	AAQ73092	695	702	0.000783	-3.10624	HQDQGTQF
FalsePositive	AMD82546	893	900	0.000783	-3.10624	RDWQNCVW
FalsePositive	ABK41189	902	909	0.000783	-3.10624	TTAQGCDI
FalsePositive	AFQ55938	966	973	0.000783	-3.10624	ARYQSHML
FalsePositive	APT69829	659	666	0.000794	-3.10018	YNEQGNNF
FalsePositive	ACV51798	1592	1599	0.000794	-3.10018	REWQGMRL
FalsePositive	YP_003358790	1698	1705	0.000794	-3.10018	NGHQGFAA
FalsePositive	ACK37368	139	146	0.000805	-3.0942	MWTQGSKG
FalsePositive	AAX47037	228	235	0.000805	-3.0942	VSTQGIQT
FalsePositive	APA32000	692	699	0.000805	-3.0942	CQEQGTQL
FalsePositive	AFO42819	532	539	0.000817	-3.08778	ADTQSDCK
FalsePositive	AEL31289	650	657	0.000817	-3.08778	TLNQGFYK
FalsePositive	AVI00674	888	895	0.000817	-3.08778	SDTQGPDN
FalsePositive	AAQ73094	894	901	0.000817	-3.08778	TTAQGCDV
FalsePositive	ABK41188	185	192	0.00084	-3.07572	KFHQGCVL
FalsePositive	CAA63480	185	192	0.00084	-3.07572	KFHQGRPI
FalsePositive	ACK37368	463	470	0.000851	-3.07007	PGAQGPTK
FalsePositive	ACK37439	702	709	0.000863	-3.06399	VASQGDNN
FalsePositive	AGV98962	1567	1574	0.000863	-3.06399	QPDQGHFT
FalsePositive	ALX38426	534	541	0.000875	-3.05799	ADAQSSCC
FalsePositive	AOG61490	689	696	0.000875	-3.05799	CQDQGTQL
FalsePositive	ADK22846	1681	1688	0.000875	-3.05799	VAEQGMLN
FalsePositive	AIZ97150	532	539	0.000887	-3.05208	ADAQSACY
FalsePositive	ABF51197	656	663	0.000887	-3.05208	DTTQGDYD
FalsePositive	AUF49675	875	882	0.000887	-3.05208	IDWQSCVW
FalsePositive	ALB73008	894	901	0.000887	-3.05208	KDWQNCVW
FalsePositive	AOP13014	907	914	0.000887	-3.05208	TAAQGCDT
FalsePositive	AVI00675	1147	1154	0.000887	-3.05208	QQVQGFAH
FalsePositive	AFR77805	1566	1573	0.000887	-3.05208	QTNQGHFT
FalsePositive	AGA18493	1681	1688	0.000887	-3.05208	VSEQGMLN
FalsePositive	AMD82094	371	378	0.000899	-3.04624	NNVQGTNN
FalsePositive	AVM86035	405	412	0.000899	-3.04624	GNHQGEKI
FalsePositive	AAK13071	644	651	0.000899	-3.04624	YNTQGEDQ
FalsePositive	AHE93351	692	699	0.000899	-3.04624	TSYQGQGT
FalsePositive	BBD18128	907	914	0.000899	-3.04624	TSAQGCDT
FalsePositive	APT69934	1567	1574	0.000924	-3.03433	QTEQGHFT
FalsePositive	ACK37386	2059	2066	0.000924	-3.03433	IAQQGVIY
FalsePositive	AAQ73084	649	656	0.000937	-3.02826	TEKQGEQI
FalsePositive	AAA45756	404	411	0.000949	-3.02273	ANRQNEQV
FalsePositive	ABO69371	1576	1583	0.000949	-3.02273	CNKQGVKL
FalsePositive	AFO83469	185	192	0.000962	-3.01682	KFHQGCLS
FalsePositive	ACR14890	660	667	0.000962	-3.01682	ITYQGNAQ
FalsePositive	YP_009246449	733	740	0.000962	-3.01682	FTRQGDPP
FalsePositive	AGA12561	1682	1689	0.000962	-3.01682	VIEQGYLN
FalsePositive	ABO76708	158	165	0.000975	-3.011	VFGQNMYH
FalsePositive	AOX15247	696	703	0.000975	-3.011	YQHQGTVK
FalsePositive	AUF49628	849	856	0.000975	-3.011	TGPQGQQT
FalsePositive	AHX57698	1611	1618	0.000975	-3.011	VDEQGINL
FalsePositive	CAD67522	1292	1299	0.000988	-3.00524	YKQQGMVI
FalsePositive	AQM32742	1429	1436	0.001	-3	QTDQGHFT
FalsePositive	AEL31290	388	395	0.00102	-2.9914	NNIQGEVG
FalsePositive	ARA15405	404	411	0.00102	-2.9914	ADRQNEQI
FalsePositive	ACK37425	469	476	0.00102	-2.9914	PGAQGPTS
FalsePositive	ABF51183	668	675	0.00102	-2.9914	HKEQGLFN
FalsePositive	AFD32987	906	913	0.00102	-2.9914	TTAQGCDA
FalsePositive	AUD09246	1681	1688	0.00102	-2.9914	VTEQGYLN
FalsePositive	AOL02449	185	192	0.00103	-2.98716	KFHQGTLM
FalsePositive	ACK37368	2059	2066	0.00104	-2.98297	IAEQGAIY
FalsePositive	AGP03469	210	217	0.00106	-2.97469	VNAQGLSN
FalsePositive	AAQ73082	230	237	0.00106	-2.97469	PSTQGNVQ
FalsePositive	AAR38842	384	391	0.00106	-2.97469	TDVQGVNR
FalsePositive	AUD09290	548	555	0.00106	-2.97469	MSMQGFVS
FalsePositive	AAD22045	1562	1569	0.00106	-2.97469	NISQGQTD
FalsePositive	APZ85758	185	192	0.00107	-2.97062	RFHQGCLL
FalsePositive	ABF51181	408	415	0.00107	-2.97062	ANQQNQKI
FalsePositive	AAQ73089	647	654	0.00107	-2.97062	YKTQGDEQ
FalsePositive	AHX57698	954	961	0.00107	-2.97062	ARYQSYLM
FalsePositive	AAR06974	532	539	0.00108	-2.96658	ADAQSDCK
FalsePositive	AKA64452	926	933	0.00108	-2.96658	ARYQSHVT
FalsePositive	ACK37408	1901	1908	0.00108	-2.96658	VFHQNPGI
FalsePositive	ADW78250	41	48	0.0011	-2.95861	QNKQGITQ
FalsePositive	AHE93351	694	701	0.0011	-2.95861	YQGQGTDH
FalsePositive	CAA74807	1042	1049	0.00113	-2.94692	TRSQGDVP
FalsePositive	ADK22846	185	192	0.00114	-2.9431	KFHQGALF
FalsePositive	AEL31290	215	222	0.00114	-2.9431	HPGQGGHR
FalsePositive	AAX47044	692	699	0.00114	-2.9431	TSHQGTAT
FalsePositive	APT69843	1026	1033	0.00114	-2.9431	AELQNISM
FalsePositive	BAM44539	1711	1718	0.00114	-2.9431	NGQQGFSA
FalsePositive	AFO83469	1711	1718	0.00114	-2.9431	IGHQGFSA
FalsePositive	AFO83469	177	184	0.00116	-2.93554	IHVQGNAS
FalsePositive	AKA64451	926	933	0.00116	-2.93554	ARYQSHVI
FalsePositive	ACD78137	45	52	0.00117	-2.93181	DFSQGPTK
FalsePositive	ABO69377	2060	2067	0.00117	-2.93181	IAQQGAKY
FalsePositive	ABM53474	389	396	0.00119	-2.92445	NNVQGNLR
FalsePositive	AUD09287	1155	1162	0.00119	-2.92445	SWLQGKII
FalsePositive	AQM32742	1473	1480	0.00119	-2.92445	VDEQGVNL
FalsePositive	ADO24588	2059	2066	0.00119	-2.92445	IAQQGVTY
FalsePositive	YP_003358790	160	167	0.0012	-2.92082	IFGQNCWY
FalsePositive	ACY40750	184	191	0.0012	-2.92082	KFHQGCLL
FalsePositive	AAQ02681	414	421	0.0012	-2.92082	AGVQNNNQ
FalsePositive	BAK57455	886	893	0.0012	-2.92082	TDWQNSVW
FalsePositive	AAW30684	908	915	0.0012	-2.92082	VNAQGRDT
FalsePositive	ALB73009	384	391	0.00122	-2.91364	TDVQGVSR
FalsePositive	AIN45140	532	539	0.00122	-2.91364	ADAQSKCY
FalsePositive	AAP37261	1682	1689	0.00123	-2.91009	VSEQGYLN
FalsePositive	APT69845	2060	2067	0.00123	-2.91009	IAQQGVKY
FalsePositive	ACK37411	408	415	0.00125	-2.90309	ANQQNTQI
FalsePositive	AVK51671	843	850	0.00125	-2.90309	GQQQGAAY
FalsePositive	ACR14890	1145	1152	0.00125	-2.90309	AFPQSPEA
FalsePositive	ANZ02994	1163	1170	0.00125	-2.90309	APSQNDQE
FalsePositive	AGS09857	1294	1301	0.00127	-2.8962	YKQQGVII
FalsePositive	ARC95292	1463	1470	0.00127	-2.8962	QSVQGIIY
FalsePositive	APT69841	1578	1585	0.00127	-2.8962	CNSQGVKL
FalsePositive	YP_009028564	1600	1607	0.00127	-2.8962	TDQQGVNL
FalsePositive	AAF12719	229	236	0.00128	-2.89279	ANGQNQVQ
FalsePositive	ABF51184	402	409	0.00128	-2.89279	QNRQGQQV
FalsePositive	APR72754	848	855	0.00128	-2.89279	TGPQGQQS
FalsePositive	YP_009353025	931	938	0.00128	-2.89279	ARYQSHIL
FalsePositive	AJK93553	1611	1618	0.00128	-2.89279	VDDQGVNL
FalsePositive	AAX47038	227	234	0.0013	-2.88606	GNHQGTTT
FalsePositive	CAA59341	210	217	0.00131	-2.88273	VNAQGLSK
FalsePositive	AQV09961	233	240	0.00131	-2.88273	HTVQGIVT
FalsePositive	ADO24588	402	409	0.00131	-2.88273	QNKQGEQV
FalsePositive	AVM86030	405	412	0.00131	-2.88273	GNYQGEKI
FalsePositive	AAQ73086	692	699	0.00131	-2.88273	TSTQGTPT
FalsePositive	ACT89356	701	708	0.00131	-2.88273	VAGQGNDT
FalsePositive	AEK77620	1611	1618	0.00131	-2.88273	VDEQGVDL
FalsePositive	ANP43767	886	893	0.00133	-2.87615	LDWQNCVW
FalsePositive	ACK37388	1674	1681	0.00133	-2.87615	NGRQGFSA
FalsePositive	AAX23606	1743	1750	0.00133	-2.87615	YFTQGQGE
FalsePositive	ACU00185	158	165	0.00136	-2.86646	VFGQNMYY
FalsePositive	APT69846	203	210	0.00136	-2.86646	SHTQGNVS
FalsePositive	AAC00531	534	541	0.00136	-2.86646	ADVQSTCD
FalsePositive	AGV98958	1567	1574	0.00136	-2.86646	QTDQGHFA
FalsePositive	ACI25595	1713	1720	0.00136	-2.86646	DGRQGFCA
FalsePositive	ACK37420	1915	1922	0.00136	-2.86646	TFHQNPGI
FalsePositive	AEO51784	41	48	0.00138	-2.86012	ASKQNFSQ
FalsePositive	AHL27172	140	147	0.00138	-2.86012	WEKQSPGW
FalsePositive	ACR14890	158	165	0.00138	-2.86012	MFGQNMYH
FalsePositive	AHX57649	292	299	0.00138	-2.86012	DYNQGATP
FalsePositive	AAQ73097	641	648	0.00138	-2.86012	YNTQGEQA
FalsePositive	AIN45139	644	651	0.00138	-2.86012	YSTQGEDQ
FalsePositive	ABV25904	706	713	0.00138	-2.86012	STGQGPNV
FalsePositive	NP_042242	778	785	0.00138	-2.86012	AHPQSNDA
FalsePositive	AAZ73345	844	851	0.0014	-2.85387	GQQQGAAF
FalsePositive	ACK37430	895	902	0.0014	-2.85387	VSLQGHGS
FalsePositive	ALP31131	941	948	0.0014	-2.85387	WIQQNEYY
FalsePositive	ACK37388	1440	1447	0.0014	-2.85387	CKNQNWII
FalsePositive	ABL61316	2137	2144	0.0014	-2.85387	RNTQGHVR
FalsePositive	ABF51186	300	307	0.00141	-2.85078	LRCQGISP
FalsePositive	APT69843	385	392	0.00141	-2.85078	NNAQGVTG
FalsePositive	ADK22846	411	418	0.00141	-2.85078	PLNQGTPT
FalsePositive	YP_003358790	1913	1920	0.00141	-2.85078	TFHQNPGV
FalsePositive	ACK37368	1699	1706	0.00143	-2.84466	NGKQGFSA
FalsePositive	ACT31465	1069	1076	0.00146	-2.83565	ASVQNIIT
FalsePositive	ABO69381	401	408	0.00148	-2.82974	PLIQGQQE
FalsePositive	ACY40750	533	540	0.00148	-2.82974	ADAQSSCY
FalsePositive	AGC03215	769	776	0.00152	-2.81816	FNQQGSYG
FalsePositive	AHA61370	954	961	0.00152	-2.81816	ARYQSHLT
FalsePositive	AKA60616	954	961	0.00152	-2.81816	ARSQSHLM
FalsePositive	AFR23503	292	299	0.00153	-2.81531	DYDQGATP
FalsePositive	AFD32987	659	666	0.00153	-2.81531	MPVQGTSN
FalsePositive	AGA18496	185	192	0.00155	-2.80967	KFHQGTLF
FalsePositive	YP_009020973	332	339	0.00155	-2.80967	DDFQSPCM
FalsePositive	ACK37417	405	412	0.00155	-2.80967	PLIQGQKN
FalsePositive	AHL77760	849	856	0.00155	-2.80967	TGLQGQQT
FalsePositive	ABC69251	1567	1574	0.00155	-2.80967	QTDQGQFT
FalsePositive	AAQ73089	139	146	0.00157	-2.8041	AWSQNSAG
FalsePositive	APR72754	139	146	0.00157	-2.8041	WEMQSAGW
FalsePositive	ACK37444	218	225	0.00157	-2.8041	PGEQGINL
FalsePositive	AUO29151	694	701	0.00157	-2.8041	TQDQGTQL
FalsePositive	ABM21518	185	192	0.00159	-2.7986	KFHQGALI
FalsePositive	ABF51180	655	662	0.00159	-2.7986	ADIQNQKE
FalsePositive	APT69827	2059	2066	0.00159	-2.7986	IAQQGTKY
FalsePositive	ACK37418	167	174	0.00161	-2.79317	YHSQGRTG
FalsePositive	AAD19342	697	704	0.00161	-2.79317	KQDQGPKL
FalsePositive	ABC69250	954	961	0.00161	-2.79317	ARYQSHLI
FalsePositive	ABM21517	396	403	0.00162	-2.79048	NAIQGKVN
FalsePositive	AGC54436	534	541	0.00162	-2.79048	ADVQSSCD
FalsePositive	ANJ61548	940	947	0.00162	-2.79048	WIEQNEYY
FalsePositive	ARD27152	1611	1618	0.00162	-2.79048	VDGQGVNL
FalsePositive	AFK79845	2046	2053	0.00162	-2.79048	VTWQNATF
FalsePositive	ACK37380	2058	2065	0.00162	-2.79048	ISEQGLKY
FalsePositive	APT69835	185	192	0.00164	-2.78516	KFHQGALV
FalsePositive	YP_009246449	952	959	0.00164	-2.78516	ARFQSHVL
FalsePositive	AJC11330	957	964	0.00164	-2.78516	MLAQGHSE
FalsePositive	AHX57738	1611	1618	0.00164	-2.78516	MDEQGVNL
FalsePositive	AHG06624	214	221	0.00166	-2.77989	PGDQGGTF
FalsePositive	AMB19799	223	230	0.00166	-2.77989	IRDQGRDN
FalsePositive	ACU00185	1140	1147	0.00166	-2.77989	EQAQGFAH
FalsePositive	ABF51205	218	225	0.00168	-2.77469	PGEQGRDV
FalsePositive	CAA74807	1587	1594	0.00168	-2.77469	TDEQGVSL
FalsePositive	AAX47044	229	236	0.0017	-2.76955	TTGQGKVQ
FalsePositive	AFK79845	747	754	0.0017	-2.76955	SNEQGNTR
FalsePositive	ACK37416	833	840	0.0017	-2.76955	KPSQGDYS
FalsePositive	AKU75593	941	948	0.0017	-2.76955	WIEQNQYY
FalsePositive	ACK37369	1050	1057	0.0017	-2.76955	VRSQGDLA
FalsePositive	AFQ55937	1288	1295	0.0017	-2.76955	YKQQGVVI
FalsePositive	ANZ02994	1913	1920	0.0017	-2.76955	TFHQNPGA
FalsePositive	AMD82094	160	167	0.00172	-2.76447	VFGQNCQY
FalsePositive	ACK37417	218	225	0.00172	-2.76447	PGEQGIDL
FalsePositive	CAD38168	227	234	0.00172	-2.76447	GNHQGTTA
FalsePositive	BAA00337	769	776	0.00172	-2.76447	FDKQGTYG
FalsePositive	ACK37386	835	842	0.00172	-2.76447	NYKQNPKN
FalsePositive	YP_003358790	938	945	0.00172	-2.76447	ARYQSHVL
FalsePositive	AJO54283	158	165	0.00173	-2.76195	IFGQNMYH
FalsePositive	ABF51200	664	671	0.00173	-2.76195	AEDQNFSK
FalsePositive	YP_009020973	986	993	0.00173	-2.76195	DYVQGLGN
FalsePositive	YP_009243645	374	381	0.00175	-2.75696	TDAQGLVR
FalsePositive	AFO83469	532	539	0.00175	-2.75696	AEVQNQSI
FalsePositive	AFQ55916	554	561	0.00175	-2.75696	APIQNAVE
FalsePositive	ACK37418	2059	2066	0.00175	-2.75696	IAEQGKTY
FalsePositive	YP_001715611	198	205	0.00177	-2.75203	EWTQGRGL
FalsePositive	ABO69379	404	411	0.00177	-2.75203	ANKQNGQI
FalsePositive	AFV92903	411	418	0.00177	-2.75203	PLQQGLAN
FalsePositive	ADO24588	835	842	0.00177	-2.75203	NYKQNPEN
FalsePositive	AFO83469	2110	2117	0.00177	-2.75203	ADEQSHFL
FalsePositive	AJO60881	66	73	0.00179	-2.74715	APLQSPSV
FalsePositive	ABF51197	218	225	0.00179	-2.74715	PGEQGREI
FalsePositive	ACK37408	218	225	0.00179	-2.74715	PGEQGRVI
FalsePositive	ABC69258	292	299	0.00179	-2.74715	DFDQGATP
FalsePositive	AAQ73091	773	780	0.00179	-2.74715	FTQQGGYG
FalsePositive	AGX93075	927	934	0.00179	-2.74715	SRAQGIDQ
FalsePositive	BAW35419	941	948	0.00179	-2.74715	WVEQNEYY
FalsePositive	ARF07867	532	539	0.00181	-2.74232	AEVQNQSV
FalsePositive	ALB72930	594	601	0.00181	-2.74232	ANTQSSSH
FalsePositive	AJO54283	812	819	0.00181	-2.74232	VKDQGTKA
FalsePositive	AJB44634	1687	1694	0.00181	-2.74232	NGAQGFSA
FalsePositive	NP_042288	185	192	0.00183	-2.73755	KFHQGLLI
FalsePositive	ACK37411	218	225	0.00183	-2.73755	PGDQGIDL
FalsePositive	AUF49643	1353	1360	0.00183	-2.73755	MYSQGGKI
FalsePositive	APT69824	158	165	0.00185	-2.73283	MFGQNMYY
FalsePositive	ABF51199	218	225	0.00185	-2.73283	PGEQGREV
FalsePositive	ACK37403	324	331	0.00185	-2.73283	ARNQSVKQ
FalsePositive	ACK37425	405	412	0.00185	-2.73283	PLTQGLKN
FalsePositive	AEB33908	679	686	0.00185	-2.73283	LTMQGDKV
FalsePositive	AFO64932	793	800	0.00185	-2.73283	EAGQGPIK
FalsePositive	ACK37380	167	174	0.00187	-2.72816	FHAQGRTG
FalsePositive	ACX85862	185	192	0.00187	-2.72816	KFHQGALG
FalsePositive	APT69843	402	409	0.00187	-2.72816	QSRQGQQV
FalsePositive	AKA64451	561	568	0.00187	-2.72816	DAVQGAIQ
FalsePositive	ACK37412	662	669	0.00187	-2.72816	ADGQNFSK
FalsePositive	APT69811	1443	1450	0.00187	-2.72816	YCEQNKWI
FalsePositive	AAL69631	1847	1854	0.00187	-2.72816	YVTQGIKK
FalsePositive	AEE01039	160	167	0.00189	-2.72354	VFGQNCQF
FalsePositive	ABO69381	167	174	0.00189	-2.72354	FHSQGRTG
FalsePositive	ARO77045	218	225	0.00189	-2.72354	PGEQGIEL
FalsePositive	ABM54517	675	682	0.00189	-2.72354	NATQGTEK
FalsePositive	AVJ35777	1000	1007	0.00189	-2.72354	SFGQGFTD
FalsePositive	ALB72999	160	167	0.00191	-2.71897	VCAQNAQF
FalsePositive	ASU43933	692	699	0.00191	-2.71897	TSTQGTSP
FalsePositive	AEL31293	535	542	0.00192	-2.7167	TTGQGAIL
FalsePositive	AJR20996	692	699	0.00192	-2.7167	TSTQGTST
FalsePositive	APT69832	1587	1594	0.00192	-2.7167	HNSQGIKL
FalsePositive	AEE25815	185	192	0.00194	-2.7122	KFHQGALA
FalsePositive	AIK66522	789	796	0.00194	-2.7122	VNEQSPYT
FalsePositive	ABM54520	927	934	0.00194	-2.7122	SKAQGIDQ
FalsePositive	ACK37441	661	668	0.00196	-2.70774	NNFQSWQI
FalsePositive	ACK37403	705	712	0.00196	-2.70774	IAGQGDDI
FalsePositive	EV68polyprotein	725	732	0.00196	-2.70774	FHWQSGCN
FalsePositive	AMB19800	846	853	0.00198	-2.70333	VHTQNAKY
FalsePositive	NP_653149	1747	1754	0.00198	-2.70333	LSWQGLRV
FalsePositive	ABO69378	160	167	0.002	-2.69897	VFGQNMFY
FalsePositive	ABO69379	387	394	0.002	-2.69897	NNLQGSDE
FalsePositive	AAQ73089	532	539	0.002	-2.69897	ADVQNKST
FalsePositive	AHL77761	849	856	0.002	-2.69897	TGLQGQQA
FalsePositive	ACK37427	1577	1584	0.002	-2.69897	YNKQGIKL
FalsePositive	ACK37384	699	706	0.00202	-2.69465	IAAQGDDV
FalsePositive	AKE33312	835	842	0.00202	-2.69465	FNVQGVTE
FalsePositive	AAT65964	185	192	0.00204	-2.69037	RFHQGALL
FalsePositive	CAA59341	695	702	0.00204	-2.69037	YQRQGTSS
FalsePositive	AGN90901	790	797	0.00204	-2.69037	VNKQSPYT
FalsePositive	CRL46950	1164	1171	0.00204	-2.69037	APSQSDQE
FalsePositive	ACK37430	2059	2066	0.00204	-2.69037	IARQGSTY
FalsePositive	ABF51196	185	192	0.00206	-2.68613	KFHQGTLI
FalsePositive	AAQ73092	406	413	0.00206	-2.68613	YNVQGGQV
FalsePositive	AAL69631	759	766	0.00206	-2.68613	INGQGNGS
FalsePositive	AAF81252	697	704	0.00208	-2.68194	STTQGQDT
FalsePositive	APW91136	834	841	0.00208	-2.68194	FKVQGVTD
FalsePositive	ABM54519	927	934	0.00208	-2.68194	SRAQGVDQ
FalsePositive	ARM53611	1590	1597	0.00208	-2.68194	MRSQGFLT
FalsePositive	AVQ54967	66	73	0.0021	-2.67778	APLQSPTA
FalsePositive	CDQ47775	66	73	0.0021	-2.67778	APLQSPSA
FalsePositive	ACK37406	185	192	0.00212	-2.67366	KFHQGTLV
FalsePositive	ADD23216	233	240	0.00214	-2.66959	NKVQNAVW
FalsePositive	BAW98045	1687	1694	0.00214	-2.66959	NGAQGFAA
FalsePositive	AAX47042	138	145	0.00216	-2.66555	VDWQNNSA
FalsePositive	ANZ02994	587	594	0.00216	-2.66555	GPHQGSAV
FalsePositive	ARM53611	1466	1473	0.00216	-2.66555	QSVQGLVY
FalsePositive	AEC13062	41	48	0.00218	-2.66154	AGKQSFKQ
FalsePositive	ARO77045	160	167	0.00218	-2.66154	VFGQNMFF
FalsePositive	APT69812	228	235	0.00218	-2.66154	ARTQNSEN
FalsePositive	AAR06974	697	704	0.00218	-2.66154	STVQGQDT
FalsePositive	ACK37368	835	842	0.00218	-2.66154	NYKQSPQN
FalsePositive	AAD45119	835	842	0.00218	-2.66154	FDVQGVTE
FalsePositive	AJO54281	534	541	0.0022	-2.65758	TAGQGAIL
FalsePositive	AHL27172	583	590	0.0022	-2.65758	ASVQNTQR
FalsePositive	AQM32742	47	54	0.00222	-2.65365	KFHQGALL
FalsePositive	APT69811	697	704	0.00222	-2.65365	IAAQGEDI
FalsePositive	ABF51202	1582	1589	0.00222	-2.65365	HNSQGVKL
FalsePositive	APT69843	2059	2066	0.00222	-2.65365	IAKQGSKY
FalsePositive	AVI00674	158	165	0.00224	-2.64975	IFGQNMYY
FalsePositive	AFD34253	185	192	0.00224	-2.64975	KFHQGSLP
FalsePositive	ACK37400	699	706	0.00224	-2.64975	VAGQGGDI
FalsePositive	AGA18497	921	928	0.00224	-2.64975	SRAQGIDT
FalsePositive	AGX93074	927	934	0.00224	-2.64975	SKAQGVDQ
FalsePositive	ABM54539	970	977	0.00224	-2.64975	ARYQSHLL
FalsePositive	ACK37369	1416	1423	0.00224	-2.64975	INMQSPPP
FalsePositive	AOS88561	1485	1492	0.00224	-2.64975	CRDQSWII
FalsePositive	ACK37392	324	331	0.00226	-2.64589	ARNQSTKQ
FalsePositive	AAX47044	405	412	0.00226	-2.64589	FNTQGGQV
FalsePositive	AHE93351	405	412	0.00226	-2.64589	FNKQGGQV
FalsePositive	AUF49659	408	415	0.00226	-2.64589	QTSQGAQV
FalsePositive	AAQ73084	835	842	0.00226	-2.64589	FEPQGVTE
FalsePositive	ABO69381	2148	2155	0.00226	-2.64589	KFVQGIRS
FalsePositive	YP_009028564	220	227	0.00228	-2.64207	MPGQGGGT
FalsePositive	AAX47042	693	700	0.00228	-2.64207	YQKQGTNL
FalsePositive	ACK37397	698	705	0.00228	-2.64207	IAAQGEDV
FalsePositive	APT69833	701	708	0.00228	-2.64207	IAGQGNDI
FalsePositive	ABF51189	837	844	0.00228	-2.64207	KPDQGEVT
FalsePositive	AGA18494	921	928	0.00228	-2.64207	GRAQGIDT
FalsePositive	ATZ76015	1342	1349	0.00228	-2.64207	KDMQGKLD
FalsePositive	ACN59569	185	192	0.00231	-2.63639	KFHQGVLL
FalsePositive	QEG13977	941	948	0.00231	-2.63639	WIEQNKYY
FalsePositive	ACK37373	1580	1587	0.00231	-2.63639	YNKQGVKL
FalsePositive	ABF51201	1583	1590	0.00231	-2.63639	YNTQGVKL
FalsePositive	AAQ73078	692	699	0.00233	-2.63264	YQEQGTRL
FalsePositive	AEL31291	815	822	0.00233	-2.63264	DGEQGMLR
FalsePositive	ABK88241	725	732	0.00235	-2.62893	YEWQSACN
FalsePositive	ABM54536	1292	1299	0.00235	-2.62893	YKQQGVVL
FalsePositive	YP_001552411	1323	1330	0.00235	-2.62893	KILQGYQN
FalsePositive	AAQ02677	185	192	0.00237	-2.62525	KFHQGTLG
FalsePositive	AIK66522	315	322	0.00237	-2.62525	APMQAEYN
FalsePositive	ABM54544	569	576	0.00237	-2.62525	HISQGALI
FalsePositive	ABM54518	865	872	0.00237	-2.62525	DIKQGTIT
FalsePositive	AMK37996	563	570	0.00239	-2.6216	MHVQNIPI
FalsePositive	BAG82822	90	97	0.00241	-2.61798	AMPEGYVQ
FalsePositive	ACK37408	323	330	0.00241	-2.61798	ARNQSVKI
FalsePositive	AHG06624	729	736	0.00241	-2.61798	ADTEGPPV
FalsePositive	ABM54544	930	937	0.00241	-2.61798	SKAQGIDT
FalsePositive	AJO54282	18	25	0.00243	-2.61439	TATQGSVI
FalsePositive	ACV51798	158	165	0.00243	-2.61439	IFGQNMFH
FalsePositive	ABM54519	235	242	0.00243	-2.61439	ETNQGRSF
FalsePositive	AFD32987	292	299	0.00243	-2.61439	GFLQGATP
FalsePositive	AIG92834	390	397	0.00243	-2.61439	ANLQSMDA
FalsePositive	AEX07779	647	654	0.00243	-2.61439	YKNQGTDG
FalsePositive	CAA55650	792	799	0.00243	-2.61439	VNEQSPYA
FalsePositive	YP_003358790	1552	1559	0.00243	-2.61439	KTGQGEFT
FalsePositive	AAX47040	204	211	0.00245	-2.61083	FNIQGALT
FalsePositive	AUF49621	357	364	0.00245	-2.61083	DNHQSPCA
FalsePositive	AUD09274	674	681	0.00245	-2.61083	APTQSASK
FalsePositive	AFK66746	904	911	0.00245	-2.61083	CKSQNKHY
FalsePositive	AAN85444	1186	1193	0.00245	-2.61083	TIHQSCPS
FalsePositive	ACK37406	1587	1594	0.00245	-2.61083	YNSQGIKL
FalsePositive	NP_653149	18	25	0.00247	-2.6073	RAEQGANI
FalsePositive	AAQ73094	214	221	0.00247	-2.6073	HLSQGERA
FalsePositive	ABM54547	930	937	0.00247	-2.6073	SRAQGADT
FalsePositive	ACK37403	1902	1909	0.00247	-2.6073	SFHQNPGI
FalsePositive	AFQ55938	1929	1936	0.00247	-2.6073	AMRQAFGH
FalsePositive	ACJ04792	41	48	0.00249	-2.6038	AGEQSLKQ
FalsePositive	AKA64452	185	192	0.00249	-2.6038	KFHQGLLL
FalsePositive	AVI00675	532	539	0.00249	-2.6038	QVTQGAIL
FalsePositive	ALP31113	941	948	0.00249	-2.6038	WIEQSEYY
FalsePositive	AHG06624	717	724	0.00251	-2.60033	YQWQSGCN
FalsePositive	BAW98046	729	736	0.00251	-2.60033	ADVEGPPV
FalsePositive	AEO51783	931	938	0.00251	-2.60033	SRAQGTDQ
FalsePositive	NP_758520	997	1004	0.00251	-2.60033	SFGQGFTA
FalsePositive	AHB78922	41	48	0.00253	-2.59688	AGKQSLTQ
FalsePositive	AAX47040	789	796	0.00253	-2.59688	AKAQNVTS
FalsePositive	AAQ02683	160	167	0.00255	-2.59346	MFGQNMFY
FalsePositive	ACK37419	185	192	0.00255	-2.59346	RFHQGTLL
FalsePositive	ANP43755	507	514	0.00255	-2.59346	RMVQNDPY
FalsePositive	AAF12719	693	700	0.00255	-2.59346	AQDQSTIS
FalsePositive	ABM21506	931	938	0.00255	-2.59346	SRAQGVDT
FalsePositive	AUN27638	1288	1295	0.00255	-2.59346	DLCQNPHG
FalsePositive	ADK22846	357	364	0.00258	-2.58838	DNFQSPCI
FalsePositive	YP_009243645	710	717	0.00258	-2.58838	YQWQSSCN
FalsePositive	ABF51188	1341	1348	0.00258	-2.58838	RDNQGKLY
FalsePositive	AFK79845	1367	1374	0.00258	-2.58838	KRTQGSYS
FalsePositive	AHX57652	41	48	0.0026	-2.58503	AGKQSLKQ
FalsePositive	ACK37381	140	147	0.0026	-2.58503	WNRQSKGW
FalsePositive	AKE33317	697	704	0.0026	-2.58503	STIQGQDS
FalsePositive	BAW98046	808	815	0.0026	-2.58503	APRQAPYK
FalsePositive	AUF49644	923	930	0.0026	-2.58503	YYCQSRCK
FalsePositive	ABM54520	235	242	0.00262	-2.5817	ETDQGRTF
FalsePositive	ASW20957	236	243	0.00262	-2.5817	DASQGRQF
FalsePositive	AAQ73082	692	699	0.00262	-2.5817	RQEQGAKL
FalsePositive	CAE12177	695	702	0.00262	-2.5817	KQDQGNRL
FalsePositive	AAQ73083	826	833	0.00262	-2.5817	YEKQGSVD
FalsePositive	ABM54550	1069	1076	0.00262	-2.5817	ASVQSVIT
FalsePositive	APZ85757	586	593	0.00264	-2.5784	QDTQGSGP
FalsePositive	QEG13977	892	899	0.00264	-2.5784	VDWQSDIL
FalsePositive	ACR14890	534	541	0.00266	-2.57512	TIAQGSIL
FalsePositive	NP_040760	727	734	0.00266	-2.57512	FEWQSACN
FalsePositive	AUD08521	185	192	0.00268	-2.57187	KFHQGSLG
FalsePositive	AAQ73077	697	704	0.00268	-2.57187	IQEQGKAL
FalsePositive	ABM54517	865	872	0.00268	-2.57187	DIKQGSIT
FalsePositive	ABF51181	891	898	0.00268	-2.57187	APYQSRDL
FalsePositive	ACZ28902	922	929	0.00268	-2.57187	SRAQGIDS
FalsePositive	ABM54521	927	934	0.00268	-2.57187	SKAQGTDQ
FalsePositive	AUF49622	1943	1950	0.00268	-2.57187	KFHQNPGT
FalsePositive	AKH49408	563	570	0.0027	-2.56864	MHVQNVPI
FalsePositive	ALB73008	697	704	0.0027	-2.56864	IQEQGTAL
FalsePositive	ADO32836	697	704	0.0027	-2.56864	KQDQGIKL
FalsePositive	ANJ61567	724	731	0.0027	-2.56864	FHWQSASN
FalsePositive	ABF51183	907	914	0.0027	-2.56864	TGAQGSET
FalsePositive	AFK79845	386	393	0.00272	-2.56543	NNIQNQIQ
FalsePositive	ALB73003	697	704	0.00272	-2.56543	QQDQGTDL
FalsePositive	ACK37395	185	192	0.00274	-2.56225	KFHQGTLL
FalsePositive	ALU66466	198	205	0.00274	-2.56225	EYVQGRSS
FalsePositive	AFK66746	561	568	0.00274	-2.56225	ATLQNTVN
FalsePositive	AEO51782	930	937	0.00274	-2.56225	SKAQGVDR
FalsePositive	ABO69371	1342	1349	0.00274	-2.56225	QINQGKLN
FalsePositive	ABF51193	140	147	0.00276	-2.55909	WDRQSKGW
FalsePositive	AAQ73078	230	237	0.00276	-2.55909	SSAQGVVQ
FalsePositive	APQ46501	347	354	0.00276	-2.55909	DDMQSPCA
FalsePositive	AUD08543	695	702	0.00276	-2.55909	KQDQGNKL
FalsePositive	ABF51189	702	709	0.00276	-2.55909	AQNEGVGH
FalsePositive	CAA24446	971	978	0.00276	-2.55909	VRYQSHML
FalsePositive	YP_009243645	1334	1341	0.00276	-2.55909	QYKQGGKL
FalsePositive	ACK37403	1586	1593	0.00276	-2.55909	YNSQGVKL
FalsePositive	ACK37389	836	843	0.00279	-2.5544	KPDQGEVA
FalsePositive	ABM54550	1198	1205	0.00279	-2.5544	VLHQSCPS
FalsePositive	AHJ78647	1532	1539	0.00279	-2.5544	APKQSLKK
FalsePositive	ACK37412	1897	1904	0.00279	-2.5544	KFHQNPGI
FalsePositive	YP_001552411	158	165	0.00281	-2.55129	IFGQNLYH
FalsePositive	ACK37393	904	911	0.00281	-2.55129	TGAQGSEI
FalsePositive	ABM54550	934	941	0.00281	-2.55129	SNAQGTDT
FalsePositive	AHK24839	1003	1010	0.00281	-2.55129	TNIQNHFT
FalsePositive	BBD13572	332	339	0.00283	-2.54821	DDYQSPCI
FalsePositive	AAZ73345	687	694	0.00283	-2.54821	STSQGVTT
FalsePositive	AAF05693	717	724	0.00283	-2.54821	FQWQSGCN
FalsePositive	APT69826	1148	1155	0.00283	-2.54821	AFPQSSET
FalsePositive	AJC11328	160	167	0.00285	-2.54516	VFGQNAQY
FalsePositive	ACU00185	531	538	0.00285	-2.54516	QTSQGAIL
FalsePositive	ACZ28901	922	929	0.00285	-2.54516	SKAQGIDS
FalsePositive	AUN27642	771	778	0.00287	-2.54212	HFHQNGVY
FalsePositive	ABF51196	1159	1166	0.00287	-2.54212	SSTQGKIK
FalsePositive	AIZ97150	647	654	0.00289	-2.5391	YHTQNDQE
FalsePositive	AAS86317	710	717	0.00289	-2.5391	FQWQSSCN
FalsePositive	ADW78250	1970	1977	0.00289	-2.5391	QFIQNLCY
FalsePositive	AAX47040	227	234	0.00291	-2.53611	DPAQGTGN
FalsePositive	AAQ73093	561	568	0.00291	-2.53611	IEQQNFYQ
FalsePositive	AAX47038	573	580	0.00291	-2.53611	DRPQGTRG
FalsePositive	BAZ95883	925	932	0.00291	-2.53611	SRAQGADS
FalsePositive	APT69843	140	147	0.00293	-2.53313	WTNQSKGW
FalsePositive	ABF51205	300	307	0.00293	-2.53313	LEAQGVPN
FalsePositive	AAQ73085	728	735	0.00293	-2.53313	YCWQSSTN
FalsePositive	ACT31466	934	941	0.00293	-2.53313	FKAQGTDT
FalsePositive	ABU62849	1148	1155	0.00293	-2.53313	AFPQSSEI
FalsePositive	ANV28269	1913	1920	0.00293	-2.53313	RVEQGKSR
FalsePositive	AAM09805	1915	1922	0.00293	-2.53313	KIEQGKSR
FalsePositive	AEB33908	2129	2136	0.00293	-2.53313	HCGQSEYE
FalsePositive	AKU75605	160	167	0.00296	-2.52871	MFGQNVQH
FalsePositive	ACK37391	229	236	0.00296	-2.52871	NRDQNDKQ
FalsePositive	AAQ73076	233	240	0.00296	-2.52871	NDVQNVVH
FalsePositive	APT69844	160	167	0.00298	-2.52578	IFGQNMFY
FalsePositive	ABM54524	355	362	0.00298	-2.52578	DNFQSPCA
FalsePositive	AHD24522	643	650	0.00298	-2.52578	KLNQGFRE
FalsePositive	ABV00569	1913	1920	0.00298	-2.52578	KVEQGRSR
FalsePositive	ABO76708	644	651	0.003	-2.52288	RLDQGFRK
FalsePositive	ABV69564	697	704	0.003	-2.52288	SSVQGQDA
FalsePositive	ANQ44599	923	930	0.003	-2.52288	SRAQGTDT
FalsePositive	AAQ04834	931	938	0.003	-2.52288	SKAQGSDQ
FalsePositive	ABV25903	1494	1501	0.003	-2.52288	ALIQSITT
FalsePositive	AAQ73076	229	236	0.00302	-2.51999	NTNQNDVQ
FalsePositive	CAA74807	602	609	0.00302	-2.51999	ASDEGMME
FalsePositive	ACK37410	795	802	0.00302	-2.51999	TNQQNHEV
FalsePositive	ACK37384	1340	1347	0.00302	-2.51999	KDQQGKLN
FalsePositive	AQM32742	22	29	0.00304	-2.51713	VFGQNAQF
FalsePositive	ANN46839	217	224	0.00304	-2.51713	KGEQGGTF
FalsePositive	AUD08526	695	702	0.00304	-2.51713	KQDQGTQL
FalsePositive	YP_009344963	807	814	0.00304	-2.51713	VPYQSRYN
FalsePositive	ACK37402	1384	1391	0.00304	-2.51713	NTCQNYTL
FalsePositive	ALB73007	138	145	0.00306	-2.51428	VTWQNTSA
FalsePositive	AGW83677	356	363	0.00306	-2.51428	DNYQSPCA
FalsePositive	AHX57686	954	961	0.00306	-2.51428	ARYQAHLM
FalsePositive	ARC95293	1586	1593	0.00306	-2.51428	MRSQGSLT
FalsePositive	ACK37412	1957	1964	0.00306	-2.51428	LGFQGDLV
FalsePositive	ADO32837	500	507	0.00308	-2.51145	WISQSHYR
FalsePositive	AFD32988	693	700	0.00308	-2.51145	AQDQSTVS
FalsePositive	AGX93075	865	872	0.00308	-2.51145	DLKQGTIT
FalsePositive	AJO54281	1000	1007	0.00308	-2.51145	AFGEGFTH
FalsePositive	ABK88241	1849	1856	0.00308	-2.51145	YILQGKKK
FalsePositive	AEA11175	41	48	0.00311	-2.50724	AGKQSLKR
FalsePositive	APT69838	1340	1347	0.00311	-2.50724	KNNQGKLD
FalsePositive	AVJ35777	160	167	0.00313	-2.50446	VFGQNVQF
FalsePositive	AAQ02682	232	239	0.00313	-2.50446	ATTQSTRK
FalsePositive	ACK37420	404	411	0.00313	-2.50446	VNKQNEQI
FalsePositive	ABU62850	643	650	0.00313	-2.50446	KLNQGFKE
FalsePositive	AAX47039	693	700	0.00313	-2.50446	RQDQGTRL
FalsePositive	ANZ02994	1883	1890	0.00313	-2.50446	KVEQGKSR
FalsePositive	YP_009246449	1914	1921	0.00313	-2.50446	KVEQGKTR
FalsePositive	ACK37445	229	236	0.00315	-2.50169	TREQNDKQ
FalsePositive	ABF51195	345	352	0.00315	-2.50169	DDFQSPCA
FalsePositive	AAQ04841	692	699	0.00315	-2.50169	RQEQGTKL
FalsePositive	ACK37412	1347	1354	0.00315	-2.50169	KIQQGKLN
FalsePositive	ACK37386	160	167	0.00317	-2.49894	IFGQNMFF
FalsePositive	BAG82822	184	191	0.00317	-2.49894	HYQQNTPI
FalsePositive	ACK37410	561	568	0.00317	-2.49894	MHIQNDAI
FalsePositive	AAQ73085	561	568	0.00317	-2.49894	ISQQNFYQ
FalsePositive	BAW35376	891	898	0.00317	-2.49894	VDWQSDVL
FalsePositive	AAP37263	923	930	0.00317	-2.49894	SKAQGTDT
FalsePositive	AFQ55937	1183	1190	0.00317	-2.49894	TLHQSCPS
FalsePositive	YP_009246449	140	147	0.00319	-2.49621	WSAQSNGW
FalsePositive	ACK37404	561	568	0.00319	-2.49621	MHVQNDAI
FalsePositive	NP_653149	694	701	0.00319	-2.49621	YMYQAMYC
FalsePositive	YP_009246449	855	862	0.00319	-2.49621	AFDEGPNL
FalsePositive	ABF51198	1269	1276	0.00319	-2.49621	DIMQNPNG
FalsePositive	ANJ61749	931	938	0.00321	-2.49349	VCFEGPGI
FalsePositive	APT69825	1251	1258	0.00321	-2.49349	DVCQNPDG
FalsePositive	ACK37405	1343	1350	0.00321	-2.49349	RDTQGKLN
FalsePositive	ACK37403	1351	1358	0.00321	-2.49349	KINQGRLN
FalsePositive	AAQ73082	347	354	0.00323	-2.4908	DDYQSPCA
FalsePositive	ABF51189	1344	1351	0.00323	-2.4908	KDNQGKLN
FalsePositive	AFR77805	1366	1373	0.00323	-2.4908	RTPQGRLD
FalsePositive	ARC95292	1586	1593	0.00323	-2.4908	MKSQGSLT
FalsePositive	AGS09864	1915	1922	0.00323	-2.4908	KVKQGKSR
FalsePositive	ACK37382	391	398	0.00326	-2.48678	NTMQNLRK
FalsePositive	AAQ73085	647	654	0.00326	-2.48678	YHTQNDSE
FalsePositive	ACS34686	922	929	0.00326	-2.48678	SNAQGTDS
FalsePositive	ACK37372	1386	1393	0.00326	-2.48678	NTCQSYPL
FalsePositive	AFS30772	158	165	0.00328	-2.48413	LFGQNMYH
FalsePositive	AJO54282	231	238	0.00328	-2.48413	NRGQNNPD
FalsePositive	AIT57556	235	242	0.00328	-2.48413	EADQGRAF
FalsePositive	ANN02908	725	732	0.00328	-2.48413	YQWQSATN
FalsePositive	AJO54282	1007	1014	0.00328	-2.48413	TNVQNHFS
FalsePositive	APQ46501	1338	1345	0.00328	-2.48413	KDNQGKLD
FalsePositive	ACK37416	1340	1347	0.00328	-2.48413	KNTQGKLD
FalsePositive	AAX47033	138	145	0.0033	-2.48149	IQWQNSSP
FalsePositive	AAZ73345	608	615	0.0033	-2.48149	ARDEGMIE
FalsePositive	ACK37373	701	708	0.0033	-2.48149	IAGQGGDV
FalsePositive	AAD02132	17	24	0.00332	-2.47886	LNAQGNSV
FalsePositive	AQV09961	695	702	0.00332	-2.47886	KQDQGTRL
FalsePositive	ACK37413	697	704	0.00332	-2.47886	ANKEGHIG
FalsePositive	ABF51206	1334	1341	0.00332	-2.47886	KDPQGKLN
FalsePositive	AJO54282	1337	1344	0.00332	-2.47886	RNSQGLLD
FalsePositive	APT69810	229	236	0.00334	-2.47625	MREQNDKQ
FalsePositive	AEL31293	158	165	0.00336	-2.47366	IFGQNLYY
FalsePositive	ABF51185	701	708	0.00336	-2.47366	IAGQGSDV
FalsePositive	ACK37416	1262	1269	0.00336	-2.47366	DIMQNPDG
FalsePositive	ACK37408	1350	1357	0.00336	-2.47366	KINQGKLN
FalsePositive	BAZ95883	133	140	0.00338	-2.47108	YTLQSVHW
FalsePositive	AMD82094	386	393	0.00338	-2.47108	VRVQNDVD
FalsePositive	YP_003358790	612	619	0.00338	-2.47108	ATPEGMIE
FalsePositive	ACK37426	1262	1269	0.00338	-2.47108	DVMQNPNG
FalsePositive	AFK79845	1906	1913	0.00338	-2.47108	CMEQNLLA
FalsePositive	ALB73006	569	576	0.00341	-2.46725	NDVQNAID
FalsePositive	AAQ73091	697	704	0.00341	-2.46725	KQDQGTSL
FalsePositive	AIT57557	865	872	0.00341	-2.46725	DLKQGSIT
FalsePositive	APP91862	1012	1019	0.00341	-2.46725	NYIQNLGN
FalsePositive	ANN02908	1489	1496	0.00341	-2.46725	AIIQSVSL
FalsePositive	ACD78142	357	364	0.00343	-2.46471	DKYQSPCA
FalsePositive	AFQ55938	739	746	0.00343	-2.46471	PEPQSWDD
FalsePositive	AFQ55938	919	926	0.00343	-2.46471	SGAQGTDT
FalsePositive	ABF51191	1256	1263	0.00343	-2.46471	DIMQNPTG
FalsePositive	ACK37423	1260	1267	0.00343	-2.46471	DIMQNPSG
FalsePositive	AVK51671	1481	1488	0.00343	-2.46471	AIVQSVSL
FalsePositive	ABU62850	1594	1601	0.00343	-2.46471	RDWQNMRL
FalsePositive	AAV54187	2075	2082	0.00343	-2.46471	LAEQGKEY
FalsePositive	AVJ35777	332	339	0.00345	-2.46218	DDFQSPCL
FalsePositive	AAT79531	405	412	0.00345	-2.46218	RSNQGSGT
FalsePositive	APT69811	559	566	0.00345	-2.46218	LHMQSMPI
FalsePositive	AIK66522	615	622	0.00345	-2.46218	RHVQNFHS
FalsePositive	CAC07403	922	929	0.00345	-2.46218	SRAQGTDS
FalsePositive	ACK37367	1342	1349	0.00345	-2.46218	KDTQGKLD
FalsePositive	ACK37428	400	407	0.00347	-2.45967	PLMQNQQE
FalsePositive	AUD08539	695	702	0.00347	-2.45967	KQDQGTKL
FalsePositive	NP_045756	866	873	0.00347	-2.45967	ADWENEVW
FalsePositive	ACK37415	1260	1267	0.00347	-2.45967	DIMQNPGG
FalsePositive	AUF49636	139	146	0.00349	-2.45717	MWQQSSPG
FalsePositive	YP_009344963	600	607	0.00349	-2.45717	ATDEGMIE
FalsePositive	ANG56888	724	731	0.00349	-2.45717	FHWQSGSN
FalsePositive	AAL69631	1912	1919	0.00349	-2.45717	AMRQAFGN
FalsePositive	APZ85758	140	147	0.00351	-2.45469	WEKQSSGW
FalsePositive	QEG13924	160	167	0.00351	-2.45469	MFGQNVQY
FalsePositive	ABO69379	1481	1488	0.00351	-2.45469	AMNQASMI
FalsePositive	AWW21311	1847	1854	0.00351	-2.45469	YLLQGKRR
FalsePositive	AJO54281	2138	2145	0.00351	-2.45469	PPYQSLYT
FalsePositive	AFR77803	293	300	0.00354	-2.451	AYNEGATT
FalsePositive	ABO69376	586	593	0.00354	-2.451	ASSQSGPK
FalsePositive	ABF51200	704	711	0.00354	-2.451	LAGQGDDI
FalsePositive	ABF51204	1343	1350	0.00354	-2.451	KDIQGKLD
FalsePositive	AAQ73079	18	25	0.00356	-2.44855	EAAQGATI
FalsePositive	AEL31289	158	165	0.00356	-2.44855	IFGQNLYF
FalsePositive	BAG70421	573	580	0.00356	-2.44855	DKIQGTVA
FalsePositive	QEG13969	725	732	0.00356	-2.44855	FHWQSSSN
FalsePositive	ANN02908	878	885	0.00356	-2.44855	EVWQSYHR
FalsePositive	ACK37388	1260	1267	0.00356	-2.44855	DVMQNPDG
FalsePositive	YP_009259673	412	419	0.00358	-2.44612	PGREGPWQ
FalsePositive	AEK98148	693	700	0.00358	-2.44612	TQEQSTIH
FalsePositive	ACU00186	905	912	0.00358	-2.44612	IQCQAHDW
FalsePositive	ABM54517	974	981	0.00358	-2.44612	SRYQSHMT
FalsePositive	AAW30684	1289	1296	0.00358	-2.44612	DLCQNPNG
FalsePositive	AKA64451	160	167	0.0036	-2.4437	MYGQNLQF
FalsePositive	AEH42468	563	570	0.0036	-2.4437	ITQQNFFQ
FalsePositive	ACV51798	644	651	0.0036	-2.4437	KLKQGFKS
FalsePositive	AAR38848	731	738	0.0036	-2.4437	FQWQSATN
FalsePositive	AAF05693	1481	1488	0.0036	-2.4437	AVIQSVSL
FalsePositive	YP_009259673	1605	1612	0.0036	-2.4437	LDEQGVNL
FalsePositive	AGM16002	160	167	0.00362	-2.44129	MFGQNAQF
FalsePositive	AIE89768	208	215	0.00362	-2.44129	DKPQNAPH
FalsePositive	AGA18499	414	421	0.00362	-2.44129	HGQQNNRQ
FalsePositive	ABF51181	597	604	0.00362	-2.44129	KHTQSVPM
FalsePositive	AUD08521	922	929	0.00362	-2.44129	SKAQGTDS
FalsePositive	AAW30683	1180	1187	0.00362	-2.44129	AASQSDLE
FalsePositive	ACK37391	1260	1267	0.00362	-2.44129	DVMQNPSG
FalsePositive	CAA56365	695	702	0.00365	-2.43771	KQDQGSRL
FalsePositive	AFQ55916	711	718	0.00365	-2.43771	YQWQSAAN
FalsePositive	AAQ73091	726	733	0.00365	-2.43771	TSVQSYAW
FalsePositive	CAD67522	904	911	0.00365	-2.43771	EDFQNAVC
FalsePositive	ACV51798	385	392	0.00367	-2.43533	NNIQSQIQ
FalsePositive	AIA21703	386	393	0.00367	-2.43533	VNTQNDLD
FalsePositive	ALB73004	851	858	0.00367	-2.43533	TIEQSEHR
FalsePositive	AEL31291	1575	1582	0.00367	-2.43533	WLEQNEKF
FalsePositive	AEL31289	1828	1835	0.00367	-2.43533	TKLQNMID
FalsePositive	AKU75605	1847	1854	0.00367	-2.43533	YLLQGRKK
FalsePositive	AMH87228	322	329	0.00369	-2.43297	GPMQNQKQ
FalsePositive	BAW35417	719	726	0.00369	-2.43297	PEKQNSFH
FalsePositive	ACK37388	725	732	0.00369	-2.43297	NTWQSSTN
FalsePositive	YP_001715611	876	883	0.00369	-2.43297	FDAQSMVW
FalsePositive	CAV31568	929	936	0.00369	-2.43297	SKAQGTDA
FalsePositive	AFR11453	160	167	0.00371	-2.43063	LFGQNMHY
FalsePositive	AFK66746	160	167	0.00371	-2.43063	VFGQNSQY
FalsePositive	AAK85710	386	393	0.00374	-2.42713	NNTQNNLQ
FalsePositive	AFR77805	597	604	0.00374	-2.42713	NTQQSSHQ
FalsePositive	ABM54518	974	981	0.00374	-2.42713	GRYQSHMI
FalsePositive	YP_009246449	987	994	0.00374	-2.42713	GDGQGTVA
FalsePositive	ABF51203	1340	1347	0.00374	-2.42713	KNAQGKLD
FalsePositive	ACK37370	1343	1350	0.00374	-2.42713	RDSQGKLD
FalsePositive	BAD72855	212	219	0.00376	-2.42481	TSYQNANP
FalsePositive	ABF51200	301	308	0.00376	-2.42481	EVAQGSEQ
FalsePositive	ASZ70601	703	710	0.00376	-2.42481	PKNQNDKR
FalsePositive	AAQ73076	763	770	0.00376	-2.42481	NFTQNGVY
FalsePositive	ACK37380	1025	1032	0.00376	-2.42481	TELQNISM
FalsePositive	AQM32742	1150	1157	0.00376	-2.42481	DLCQNPDG
FalsePositive	ACJ04794	1288	1295	0.00376	-2.42481	GLCQNPDG
FalsePositive	AGC03216	160	167	0.00378	-2.42251	LFGQNMMY
FalsePositive	AUF49633	160	167	0.00378	-2.42251	LFAQNMMY
FalsePositive	AAT65964	214	221	0.00378	-2.42251	ALCEGDKA
FalsePositive	AGA18495	414	421	0.00378	-2.42251	HGQQNNKQ
FalsePositive	ARO77045	586	593	0.0038	-2.42022	ASTQSGSK
FalsePositive	ACK37403	657	664	0.0038	-2.42022	HEGQNVYN
FalsePositive	YP_009259673	838	845	0.0038	-2.42022	YDGQNIHP
FalsePositive	AJB44634	858	865	0.0038	-2.42022	ADWENVVW
FalsePositive	AEE01039	862	869	0.0038	-2.42022	ADWENVEW
FalsePositive	AAD46138	927	934	0.0038	-2.42022	VVFEGPGM
FalsePositive	ACK37435	1256	1263	0.0038	-2.42022	DIMQNPAG
FalsePositive	ACU00186	1576	1583	0.0038	-2.42022	WLDQNEKF
FalsePositive	AEE01039	602	609	0.00382	-2.41794	ASDEGMIE
FalsePositive	ACK37412	702	709	0.00382	-2.41794	LAGQGEDI
FalsePositive	AAX23607	925	932	0.00382	-2.41794	SRAQGTDL
FalsePositive	ACU00186	991	998	0.00382	-2.41794	AFGEGFTQ
FalsePositive	ACK37418	1026	1033	0.00382	-2.41794	AELQSTTT
FalsePositive	ANJ61749	1846	1853	0.00382	-2.41794	YLLQGKKK
FalsePositive	CAA24445	5	12	0.00385	-2.41454	QLFQSDNC
FalsePositive	APT69823	158	165	0.00385	-2.41454	LFGQNMYY
FalsePositive	ACY40750	384	391	0.00385	-2.41454	VPVQNIGE
FalsePositive	ACK37380	399	406	0.00385	-2.41454	PLHQNRQE
FalsePositive	APT68348	417	424	0.00385	-2.41454	GPWQSTMI
FalsePositive	ACK37380	730	737	0.00385	-2.41454	YTWQSATN
FalsePositive	ACK37428	732	739	0.00385	-2.41454	YTWQSASN
FalsePositive	ABF51184	934	941	0.00385	-2.41454	VWIEGNNY
FalsePositive	AJO54281	349	356	0.00387	-2.41229	EDEQSPNM
FalsePositive	AIB00633	586	593	0.00387	-2.41229	KVAQGALT
FalsePositive	ACK37400	587	594	0.00387	-2.41229	NINQSNPT
FalsePositive	ABM21504	605	612	0.00387	-2.41229	NTVQNTQQ
FalsePositive	BAA00168	1342	1349	0.00387	-2.41229	KDAQGKLN
FalsePositive	ACK37380	133	140	0.00389	-2.41005	YTLQSKMW
FalsePositive	ABM21507	727	734	0.00389	-2.41005	YYTQNSGH
FalsePositive	AUF49658	851	858	0.00389	-2.41005	TIVQSEHR
FalsePositive	ABF51191	1334	1341	0.00389	-2.41005	KDSQGKLN
FalsePositive	AMK37996	1419	1426	0.00389	-2.41005	ISLQNPPP
FalsePositive	ABO76708	1434	1441	0.00389	-2.41005	WIKQSRCS
FalsePositive	ADK22846	138	145	0.00392	-2.40671	VEWQSSSR
FalsePositive	YP_009353025	160	167	0.00392	-2.40671	VFGQNSQF
FalsePositive	BBD13572	160	167	0.00392	-2.40671	MFGQNLQF
FalsePositive	AFR79234	204	211	0.00392	-2.40671	TNVQNAPA
FalsePositive	AUF49675	223	230	0.00392	-2.40671	SFEQNPAT
FalsePositive	ABF51195	385	392	0.00392	-2.40671	NLQQNISN
FalsePositive	ARM53611	386	393	0.00392	-2.40671	VTTQSNPD
FalsePositive	APT69844	401	408	0.00392	-2.40671	PLMQNLQE
FalsePositive	AUF49666	416	423	0.00392	-2.40671	GPWQSTMV
FalsePositive	ACK37407	586	593	0.00392	-2.40671	ASVQSGSK
FalsePositive	AAQ73091	884	891	0.00392	-2.40671	LATQNDWQ
FalsePositive	ACK37427	1342	1349	0.00392	-2.40671	KDAQGKLD
FalsePositive	ACK37375	1343	1350	0.00392	-2.40671	KDGQGKLD
FalsePositive	YP_009028564	160	167	0.00394	-2.4045	MFGQNAVY
FalsePositive	AAQ73096	233	240	0.00394	-2.4045	HTVQSIVC
FalsePositive	AMB57002	563	570	0.00394	-2.4045	ISQQNFFQ
FalsePositive	ACK37368	838	845	0.00394	-2.4045	QSPQNPIK
FalsePositive	ADD23216	923	930	0.00394	-2.4045	VCFEGPGL
FalsePositive	AAK85710	923	930	0.00394	-2.4045	YYCQSRNK
FalsePositive	APT69830	1345	1352	0.00394	-2.4045	KDSQGKLD
FalsePositive	AAQ73080	366	373	0.00396	-2.4023	GEVQNMME
FalsePositive	ACK37408	829	836	0.00396	-2.4023	VAYQSTYT
FalsePositive	AAQ02675	919	926	0.00396	-2.4023	SGAQGTDA
FalsePositive	ADU34211	1258	1265	0.00396	-2.4023	DLHQNPDG
FalsePositive	AAQ73092	388	395	0.00398	-2.40012	NIQQNLQS
FalsePositive	AVJ35777	520	527	0.00398	-2.40012	GFPQNCGI
FalsePositive	ACX85864	586	593	0.00398	-2.40012	EVAQGALT
FalsePositive	ACK37405	588	595	0.00398	-2.40012	NIKQSEPT
FalsePositive	ACK37388	346	353	0.00401	-2.39686	DDMQSPSV
FalsePositive	ABM54524	598	605	0.00401	-2.39686	NTQQSLPN
FalsePositive	BAM71656	888	895	0.00401	-2.39686	FGHQNMAV
FalsePositive	AGA12360	923	930	0.00401	-2.39686	SKAQGTDL
FalsePositive	ABO69370	1379	1386	0.00401	-2.39686	NTCQSYTL
FalsePositive	ADO24588	139	146	0.00403	-2.39469	TWSQNSKG
FalsePositive	ACI23463	768	775	0.00403	-2.39469	NFSQNGRY
FalsePositive	BAK57451	792	799	0.00403	-2.39469	VNEQNLGV
FalsePositive	AOS88562	2120	2127	0.00403	-2.39469	PDEQSPFL
FalsePositive	CAD38168	17	24	0.00405	-2.39254	LSAQGNSV
FalsePositive	ACK37401	565	572	0.00405	-2.39254	MHTQSDAI
FalsePositive	AIN45139	818	825	0.00405	-2.39254	CEYQSKSN
FalsePositive	ABU41835	875	882	0.00405	-2.39254	TPVQNITT
FalsePositive	ABF51197	2128	2135	0.00405	-2.39254	HEYQNFVK
FalsePositive	AVK78347	5	12	0.0041	-2.38722	VSRQNNGT
FalsePositive	APT68362	396	403	0.0041	-2.38722	VRAQNNVD
FalsePositive	AAQ02676	609	616	0.0041	-2.38722	NTQQSAPV
FalsePositive	AUF49663	923	930	0.0041	-2.38722	YYCQSKNK
FalsePositive	AMK74873	923	930	0.0041	-2.38722	YYCQSRRK
FalsePositive	ARA15405	1980	1987	0.0041	-2.38722	TLIQSICN
FalsePositive	ACK37413	296	303	0.00413	-2.38405	CQLQSNNT
FalsePositive	APT69811	387	394	0.00413	-2.38405	NLEQNIRN
FalsePositive	AKL88020	532	539	0.00413	-2.38405	PATQSKCF
FalsePositive	BAG70421	838	845	0.00413	-2.38405	TARQNIRD
FalsePositive	ABM21517	852	859	0.00413	-2.38405	VPYQNSTV
FalsePositive	AAQ02683	852	859	0.00413	-2.38405	VPYQNSSV
FalsePositive	AEO51782	911	918	0.00413	-2.38405	EDYQNCVR
FalsePositive	AKU75596	932	939	0.00413	-2.38405	ICFEGPRI
FalsePositive	AMK74873	934	941	0.00413	-2.38405	VYFEGPGI
FalsePositive	ANN02908	1243	1250	0.00413	-2.38405	AECEGSDV
FalsePositive	ANJ61542	1283	1290	0.00413	-2.38405	DLMQNPDG
FalsePositive	APT69835	1344	1351	0.00413	-2.38405	KLNQGKLN
FalsePositive	AAQ73093	532	539	0.00415	-2.38195	PSTQSKCF
FalsePositive	ABF51192	563	570	0.00415	-2.38195	MHIQSDAI
FalsePositive	AAQ73077	772	779	0.00415	-2.38195	HFTQNGGY
FalsePositive	APT69822	989	996	0.00415	-2.38195	AFGEGFTN
FalsePositive	ABO69370	1338	1345	0.00415	-2.38195	KDLQGKLN
FalsePositive	ABF51186	1622	1629	0.00415	-2.38195	VANQSEPT
FalsePositive	AKA64451	332	339	0.00417	-2.37986	DDEQSPCL
FalsePositive	ABM21512	604	611	0.00417	-2.37986	PPEQSVPN
FalsePositive	AQX83055	831	838	0.00417	-2.37986	MRNQNYLF
FalsePositive	AGX93074	865	872	0.00417	-2.37986	DLKQGTVA
FalsePositive	AKA64452	1475	1482	0.00417	-2.37986	AVLQSASL
FalsePositive	ALX38428	385	392	0.0042	-2.37675	VPVQNVGE
FalsePositive	ABF51180	732	739	0.0042	-2.37675	FTWQSASN
FalsePositive	AVM86034	923	930	0.0042	-2.37675	YYCQSRSK
FalsePositive	ABO69374	138	145	0.00422	-2.37469	KNWQSDSK
FalsePositive	YP_009259673	395	402	0.00422	-2.37469	VSVQNEVD
FalsePositive	AEO51780	605	612	0.00422	-2.37469	NSVQNTQQ
FalsePositive	ACK37385	1344	1351	0.00422	-2.37469	KVAQGKLN
FalsePositive	AMB19798	1430	1437	0.00422	-2.37469	WIKQSRHS
FalsePositive	CAD38168	139	146	0.00425	-2.37161	KWEQNSPG
FalsePositive	AAX47044	233	240	0.00425	-2.37161	GKVQNQVC
FalsePositive	APQ46501	296	303	0.00425	-2.37161	CQLQSNNI
FalsePositive	CAA56365	406	413	0.00425	-2.37161	GNHQSDQV
FalsePositive	AVQ54967	659	666	0.00425	-2.37161	LPLQGTVN
FalsePositive	AGN90901	767	774	0.00425	-2.37161	HFTQNGVY
FalsePositive	AAX47035	283	290	0.00427	-2.36957	YRHQNFTL
FalsePositive	AFD32987	594	601	0.00427	-2.36957	ANTQASQH
FalsePositive	APW91136	912	919	0.00427	-2.36957	YFCQSRNK
FalsePositive	ADD23216	912	919	0.00427	-2.36957	YFCQSKNR
FalsePositive	AAQ73080	930	937	0.00427	-2.36957	VHFEGPGL
FalsePositive	QEG13928	931	938	0.00427	-2.36957	ICFEGPGI
FalsePositive	ALB72975	185	192	0.00429	-2.36754	KFLQGALL
FalsePositive	AAQ73093	229	236	0.00429	-2.36754	TTGQNEVQ
FalsePositive	AMB57005	385	392	0.00429	-2.36754	VPVQNVEE
FalsePositive	AEB33908	564	571	0.00429	-2.36754	AIKQAVHK
FalsePositive	AAA65044	569	576	0.00429	-2.36754	NDVQNAVE
FalsePositive	ACK37408	703	710	0.00429	-2.36754	LAGQGDDL
FalsePositive	ACK37433	743	750	0.00429	-2.36754	QHGQSYPR
FalsePositive	AJO54281	1059	1066	0.00429	-2.36754	LGCQSSPW
FalsePositive	ACK37393	586	593	0.00432	-2.36452	ASSQSGSK
FalsePositive	ALB73007	17	24	0.00434	-2.36251	LNAQGSSI
FalsePositive	AUF49622	418	425	0.00434	-2.36251	NNNQSIFS
FalsePositive	AEO51783	611	618	0.00434	-2.36251	NTTQSFPE
FalsePositive	AOL02449	742	749	0.00434	-2.36251	FWQEGQPY
FalsePositive	ABF51198	1422	1429	0.00434	-2.36251	IDLQSPPP
FalsePositive	ABO69379	1980	1987	0.00434	-2.36251	SLIQSICH
FalsePositive	ACK37409	202	209	0.00437	-2.35952	ASHEGGNV
FalsePositive	YP_007985635	332	339	0.00437	-2.35952	DDFQSPSI
FalsePositive	AAF21972	400	407	0.00437	-2.35952	IPVQSNMD
FalsePositive	APT69830	587	594	0.00437	-2.35952	NINQSNPS
FalsePositive	AUO29150	693	700	0.00437	-2.35952	TQEQSTIQ
FalsePositive	ALB72979	954	961	0.00437	-2.35952	SRYQSHLM
FalsePositive	AHK24839	996	1003	0.00437	-2.35952	AFGEGFTT
FalsePositive	AJO60891	1181	1188	0.00437	-2.35952	NMEQSAAS
FalsePositive	ABO69370	1439	1446	0.00437	-2.35952	KYCEGNKW
FalsePositive	ACK37374	5	12	0.00439	-2.35754	VSRQNVGT
FalsePositive	QCE20693	6	13	0.00439	-2.35754	TRQQSGTH
FalsePositive	AAQ73077	138	145	0.00439	-2.35754	VSWQSTSA
FalsePositive	AEC47475	160	167	0.00439	-2.35754	VFGQNAQL
FalsePositive	ABF51198	351	358	0.00439	-2.35754	DDMQSPSA
FalsePositive	ABA43708	390	397	0.00439	-2.35754	ISPQSDMD
FalsePositive	ACK37368	399	406	0.00439	-2.35754	PLVQNMQG
FalsePositive	AJO54283	1431	1438	0.00439	-2.35754	WIKQSKHS
FalsePositive	AUD08542	233	240	0.00442	-2.35458	CTVQSIVT
FalsePositive	AAX47034	234	241	0.00442	-2.35458	GKVQNAVC
FalsePositive	AAQ02679	611	618	0.00442	-2.35458	NTQQSAPS
FalsePositive	ABM21503	724	731	0.00442	-2.35458	YYSQNSGH
FalsePositive	AAX47037	844	851	0.00442	-2.35458	PEMQNTGA
FalsePositive	AUO29151	923	930	0.00442	-2.35458	YYCQSKGK
FalsePositive	ACK37387	1384	1391	0.00442	-2.35458	NTCQSYAL
FalsePositive	ABO69379	202	209	0.00444	-2.35262	ASHEGSNV
FalsePositive	AUF49657	349	356	0.00444	-2.35262	DDFQSPSV
FalsePositive	AAQ73094	912	919	0.00444	-2.35262	YFCQSKNK
FalsePositive	BAG70420	233	240	0.00447	-2.34969	TKIQSVVH
FalsePositive	AFO83469	534	541	0.00447	-2.34969	VQNQSIIL
FalsePositive	ACU00186	657	664	0.00447	-2.34969	FQEQSHIR
FalsePositive	ACK37387	796	803	0.00447	-2.34969	EEHQNQIE
FalsePositive	AUD08521	969	976	0.00447	-2.34969	SRYQSHML
FalsePositive	ACK37439	1140	1147	0.00447	-2.34969	TYIQSLKQ
FalsePositive	ACK37423	1528	1535	0.00447	-2.34969	VTTQNGKF
FalsePositive	ABU41836	133	140	0.0045	-2.34679	YTLQSVNW
FalsePositive	ACK37430	399	406	0.0045	-2.34679	PLMQNKQG
FalsePositive	ACK37379	564	571	0.0045	-2.34679	MHVQSEAI
FalsePositive	ABM21516	611	618	0.0045	-2.34679	NTQQSAPA
FalsePositive	AKE33315	851	858	0.0045	-2.34679	TIEQSKHR
FalsePositive	AKH49408	2119	2126	0.0045	-2.34679	HNGQSAYR
FalsePositive	APT69834	391	398	0.00452	-2.34486	NTTQNLRK
FalsePositive	AIZ97148	659	666	0.00452	-2.34486	LPLQGTAN
FalsePositive	YP_009344963	712	719	0.00452	-2.34486	YQWQSGAN
FalsePositive	ABO69371	1957	1964	0.00452	-2.34486	HLVQNLCS
FalsePositive	AFY09605	347	354	0.00455	-2.34199	DEFQSPSP
FalsePositive	ACK37397	388	395	0.00455	-2.34199	NLEQNIRK
FalsePositive	ABO69380	652	659	0.00455	-2.34199	EIPQNPTP
FalsePositive	AUF49661	733	740	0.00455	-2.34199	FQWQSSTN
FalsePositive	ABV25904	733	740	0.00455	-2.34199	FAWQSATN
FalsePositive	AAF05693	870	877	0.00455	-2.34199	EVWQSYQR
FalsePositive	AHD24522	1433	1440	0.00455	-2.34199	WIKQSKYS
FalsePositive	AAQ73081	406	413	0.00457	-2.34008	GNHQSEQV
FalsePositive	AUD09264	586	593	0.00457	-2.34008	EVAQGALA
FalsePositive	AGS09855	883	890	0.00457	-2.34008	HGHQNKAV
FalsePositive	AMB19798	1425	1432	0.00457	-2.34008	CEREGWIK
FalsePositive	APT69810	385	392	0.0046	-2.33724	NLEQNVTN
FalsePositive	ADW78250	711	718	0.0046	-2.33724	YAWQSAAN
FalsePositive	BAK57452	923	930	0.0046	-2.33724	YFCQSRGK
FalsePositive	AAA65044	1359	1366	0.0046	-2.33724	MYNQNGKI
FalsePositive	ACK37412	1623	1630	0.0046	-2.33724	TANQSEPT
FalsePositive	ARM53611	500	507	0.00463	-2.33442	QYYQSGYV
FalsePositive	AFR77805	593	600	0.00463	-2.33442	TTAQNTQQ
FalsePositive	ANN46830	932	939	0.00463	-2.33442	IHFEGPGI
FalsePositive	AMB19798	1781	1788	0.00463	-2.33442	YGMQNLEP
FalsePositive	ACK37420	1941	1948	0.00463	-2.33442	CLMEGHLM
FalsePositive	ABO69378	202	209	0.00465	-2.33255	ASHEGGTV
FalsePositive	ACI23463	282	289	0.00465	-2.33255	FRHQNFTL
FalsePositive	AFR11453	346	353	0.00465	-2.33255	DNFQSPSA
FalsePositive	ACK37419	392	399	0.00465	-2.33255	NTSQNLRN
FalsePositive	ALC04479	417	424	0.00465	-2.33255	GPWQSTML
FalsePositive	ACK37445	526	533	0.00465	-2.33255	IAPQNTPQ
FalsePositive	AAQ02675	598	605	0.00465	-2.33255	TTVQNTTQ
FalsePositive	ACK37388	1127	1134	0.00465	-2.33255	PQAQNKIK
FalsePositive	BAE20392	1740	1747	0.00465	-2.33255	YFTQNQGE
FalsePositive	APT69828	13	20	0.00468	-2.32975	HSTQNMVS
FalsePositive	AAQ73080	142	149	0.00468	-2.32975	ANSNGWWW
FalsePositive	ABF51202	301	308	0.00468	-2.32975	LETQGGTS
FalsePositive	YP_009344963	374	381	0.00468	-2.32975	ADVEGAKR
FalsePositive	ABO69381	531	538	0.00468	-2.32975	GTNQNVYI
FalsePositive	AAQ73094	560	567	0.00468	-2.32975	FISQNNFY
FalsePositive	AFK66746	579	586	0.00468	-2.32975	NTSQSTHN
FalsePositive	ALB72924	1285	1292	0.00468	-2.32975	DLYQNPDG
FalsePositive	AAQ73079	1364	1371	0.00468	-2.32975	VYSQNGKI
FalsePositive	AMK37996	2119	2126	0.00468	-2.32975	HNGQSAYK
FalsePositive	ADO32836	138	145	0.00471	-2.32698	VSWQSGSA
FalsePositive	AGA12615	160	167	0.00471	-2.32698	LFGQNMFY
FalsePositive	ANN02908	331	338	0.00471	-2.32698	DELQSPCV
FalsePositive	APR72754	159	166	0.00474	-2.32422	LFGQNMQY
FalsePositive	AAL69631	336	343	0.00474	-2.32422	DNFQSPNL
FalsePositive	BBD13572	368	375	0.00474	-2.32422	VEIQNVDG
FalsePositive	ANZ02994	414	421	0.00474	-2.32422	GPWQSTYL
FalsePositive	AUF49648	696	703	0.00474	-2.32422	YQHQSTVN
FalsePositive	YP_009028564	940	947	0.00474	-2.32422	HRYQSHVL
FalsePositive	APT69822	1426	1433	0.00474	-2.32422	CEKEGWIK
FalsePositive	AEJ54593	139	146	0.00476	-2.32239	SWTQNSRG
FalsePositive	ACK37383	298	305	0.00476	-2.32239	CPLQSEGT
FalsePositive	AMB19800	322	329	0.00476	-2.32239	GPMQSQKQ
FalsePositive	AAQ02680	570	577	0.00476	-2.32239	HISQSAMP
FalsePositive	ABM54522	599	606	0.00476	-2.32239	TSQQSLPN
FalsePositive	AVJ35777	723	730	0.00476	-2.32239	IFFQSNGV
FalsePositive	ABF51203	726	733	0.00476	-2.32239	YTWQSGTN
FalsePositive	ANZ02994	873	880	0.00476	-2.32239	FDAQSVVW
FalsePositive	ACU00186	995	1002	0.00476	-2.32239	GFTQNIRD
FalsePositive	AGS09858	1743	1750	0.00476	-2.32239	YFIQNQGE
FalsePositive	AKH49408	1942	1949	0.00476	-2.32239	VWFQALKQ
FalsePositive	AGA18496	5	12	0.00479	-2.31966	VSAQNNGT
FalsePositive	AAF12719	138	145	0.00479	-2.31966	VSWQSSSA
FalsePositive	ACK37429	351	358	0.00479	-2.31966	DDLQSPCA
FalsePositive	AKC92706	799	806	0.00479	-2.31966	APTEGDSL
FalsePositive	ACU00186	888	895	0.00479	-2.31966	DCLEGCYY
FalsePositive	AGS09857	1743	1750	0.00479	-2.31966	YFVQNQGE
FalsePositive	ABF51198	2126	2133	0.00479	-2.31966	HEYQSFVD
FalsePositive	ALB72944	45	52	0.00482	-2.31695	DFAQNPAK
FalsePositive	ABV25903	60	67	0.00482	-2.31695	ALKEGAPV
FalsePositive	ABF51205	228	235	0.00482	-2.31695	TGRQNATK
FalsePositive	AJC11326	395	402	0.00482	-2.31695	VSTQSDKD
FalsePositive	AFQ55938	598	605	0.00482	-2.31695	TTVQNTVQ
FalsePositive	AEO51782	603	610	0.00482	-2.31695	PAEQSVPN
FalsePositive	AVM86035	769	776	0.00482	-2.31695	HFSQNGVY
FalsePositive	ANV28234	883	890	0.00482	-2.31695	FGHQNNAV
FalsePositive	AAQ73086	1362	1369	0.00482	-2.31695	MYTQNGKI
FalsePositive	ALU66466	1534	1541	0.00482	-2.31695	MPKQNVKK
FalsePositive	ABV25904	416	423	0.00485	-2.31426	GPWQSTIV
FalsePositive	ACK37368	552	559	0.00485	-2.31426	KDTQSIHQ
FalsePositive	AMB56999	563	570	0.00485	-2.31426	ITQQNFLQ
FalsePositive	ABM21509	604	611	0.00485	-2.31426	PSEQSVPN
FalsePositive	YP_001715611	721	728	0.00485	-2.31426	YEWQSGTN
FalsePositive	AAT65964	728	735	0.00485	-2.31426	YTWQSSTN
FalsePositive	AAQ02684	749	756	0.00485	-2.31426	YTWQSSSN
FalsePositive	ABU41835	885	892	0.00485	-2.31426	FGHQNQAV
FalsePositive	ACU00185	893	900	0.00485	-2.31426	DCTQACYY
FalsePositive	CAA63480	932	939	0.00485	-2.31426	FFCQSKNK
FalsePositive	ALB72995	1288	1295	0.00485	-2.31426	DLCQSPDG
FalsePositive	AAL69631	1424	1431	0.00485	-2.31426	HNTQNLVE
FalsePositive	AMB19798	1923	1930	0.00485	-2.31426	VWFQALEQ
FalsePositive	ACZ67658	215	222	0.00487	-2.31247	HPGQSGHQ
FalsePositive	AAK13071	345	352	0.00487	-2.31247	DDFQSPSA
FalsePositive	AUD08541	348	355	0.00487	-2.31247	DDFQSPTA
FalsePositive	AUD08533	406	413	0.00487	-2.31247	GNHQSAQV
FalsePositive	AFV92903	418	425	0.00487	-2.31247	NKEQSIFS
FalsePositive	AAQ04840	534	541	0.00487	-2.31247	VQNQSVIL
FalsePositive	ABF51200	656	663	0.00487	-2.31247	NHEEGKYN
FalsePositive	AAF81252	693	700	0.00487	-2.31247	TQEQSTTQ
FalsePositive	AAX47036	697	704	0.00487	-2.31247	YQHQSTIS
FalsePositive	ASU64358	929	936	0.00487	-2.31247	VSFEGPGF
FalsePositive	ASZ70601	958	965	0.00487	-2.31247	AGGEGCVA
FalsePositive	AEL31291	1340	1347	0.00487	-2.31247	QRCEGCPT
FalsePositive	ABF51201	1348	1355	0.00487	-2.31247	KLGQGKLN
FalsePositive	ACK37381	1529	1536	0.00487	-2.31247	VSTQNGKF
FalsePositive	ABF51186	229	236	0.0049	-2.3098	DRKQNNRQ
FalsePositive	ABF51184	399	406	0.0049	-2.3098	PLYQNRQG
FalsePositive	AFH66790	519	526	0.0049	-2.3098	IWYQANYV
FalsePositive	YP_003358790	577	584	0.0049	-2.3098	TTIQNLTP
FalsePositive	ABO69375	728	735	0.0049	-2.3098	YVWQSGTN
FalsePositive	ARM53611	830	837	0.0049	-2.3098	PDRQSITT
FalsePositive	ACT89355	1343	1350	0.0049	-2.3098	KLSQGKLN
FalsePositive	APT69839	227	234	0.00493	-2.30715	QNRQNNDK
FalsePositive	APT69827	400	407	0.00493	-2.30715	PLVQNQQE
FalsePositive	YP_009028564	721	728	0.00493	-2.30715	YEWQSSTN
FalsePositive	ABM54520	865	872	0.00493	-2.30715	DLKQGSVL
FalsePositive	AFK79845	990	997	0.00493	-2.30715	AFGEGFTS
FalsePositive	ABF51202	66	73	0.00496	-2.30452	PTLQSPSV
FalsePositive	ABO69370	66	73	0.00496	-2.30452	PTLQSPTV
FalsePositive	ABM54525	133	140	0.00496	-2.30452	YTLQSVEW
FalsePositive	AAR38842	139	146	0.00496	-2.30452	SWTQNSKG
FalsePositive	AAL37156	223	230	0.00496	-2.30452	QFEQNAVT
FalsePositive	ADU20413	798	805	0.00496	-2.30452	AQAEGDSL
FalsePositive	AHX57770	831	838	0.00496	-2.30452	MRSQNYLF
FalsePositive	AFS30772	995	1002	0.00496	-2.30452	GFTQNIKD
FalsePositive	AMB19800	1148	1155	0.00496	-2.30452	QEAQNELC
FalsePositive	AIZ97145	160	167	0.00499	-2.3019	LFGQNMQF
FalsePositive	APX43287	345	352	0.00499	-2.3019	DDYQSPSA
FalsePositive	AUO29156	347	354	0.00499	-2.3019	DDYQSPTA
FalsePositive	ARM53611	371	378	0.00499	-2.3019	NNVQSAGR
FalsePositive	AHK24837	593	600	0.00499	-2.3019	KHTQSVPT
FalsePositive	ABM21507	611	618	0.00499	-2.3019	NTNQSTPE
FalsePositive	ABF51204	623	630	0.00499	-2.3019	RQVQNFQT
FalsePositive	ADN52609	240	247	0.00502	-2.2993	PISQSTVC
FalsePositive	ADO32836	299	306	0.00502	-2.2993	LASQGGST
FalsePositive	AIZ97148	394	401	0.00502	-2.2993	VPVQSQSE
FalsePositive	ACK37380	552	559	0.00502	-2.2993	KDTQSIYQ
FalsePositive	ACK37417	842	849	0.00502	-2.2993	YERQNIKP
FalsePositive	ACK37408	918	925	0.00502	-2.2993	NCTQATYY
FalsePositive	AHK24838	992	999	0.00502	-2.2993	AFGEGFTA
FalsePositive	AQV09961	214	221	0.00505	-2.29671	AISEGEIA
FalsePositive	YP_003358790	394	401	0.00505	-2.29671	VSVQSDVD
FalsePositive	YP_009020973	575	582	0.00505	-2.29671	NTVQSTHS
FalsePositive	AAR06974	693	700	0.00505	-2.29671	TQEQSTVQ
FalsePositive	ACK37418	934	941	0.00505	-2.29671	IWIEGNNY
FalsePositive	AIZ97150	386	393	0.00508	-2.29414	NNLQNTVN
FalsePositive	ABO76708	387	394	0.00508	-2.29414	NVNQSHTL
FalsePositive	AVM86030	390	397	0.00508	-2.29414	VNLQSMDA
FalsePositive	BAA18891	390	397	0.00508	-2.29414	ISAQSDMD
FalsePositive	ACK37429	654	661	0.00508	-2.29414	ITIQNDVE
FalsePositive	ACU00186	1115	1122	0.00508	-2.29414	PAVQNKKQ
FalsePositive	APR72754	1159	1166	0.00508	-2.29414	TIEQSAPS
FalsePositive	ACK37425	13	20	0.00511	-2.29158	HENQNILT
FalsePositive	ASW20959	66	73	0.00511	-2.29158	PPLQSPSA
FalsePositive	ACK37375	300	307	0.00511	-2.29158	LESQGTEG
FalsePositive	ACK37389	391	398	0.00511	-2.29158	NTAQNLRK
FalsePositive	YP_009353025	617	624	0.00511	-2.29158	VLNQNGIR
FalsePositive	AFS30772	1430	1437	0.00511	-2.29158	CEDEGWIG
FalsePositive	APT69824	5	12	0.00514	-2.28904	VSKQNVGS
FalsePositive	AAQ02675	142	149	0.00514	-2.28904	ADSRGWWW
FalsePositive	AVQ54963	584	591	0.00514	-2.28904	ALTQAMPA
FalsePositive	ABF51180	593	600	0.00514	-2.28904	KHTQSVPI
FalsePositive	AAQ73082	767	774	0.00514	-2.28904	HFSQNGAY
FalsePositive	AUF49637	851	858	0.00514	-2.28904	TIVQSGHR
FalsePositive	ABC69253	884	891	0.00514	-2.28904	LATQNDWA
FalsePositive	BAW98046	1235	1242	0.00514	-2.28904	AEYEGSDV
FalsePositive	ACK37430	202	209	0.00517	-2.28651	ASIEGANV
FalsePositive	AMK74873	390	397	0.00517	-2.28651	NNLQSMDA
FalsePositive	AAR06974	400	407	0.00517	-2.28651	IPVQSNPT
FalsePositive	AFQ55916	602	609	0.00517	-2.28651	ASDEGMLE
FalsePositive	ABF51191	725	732	0.00517	-2.28651	YAWQSGTN
FalsePositive	ACK37380	1274	1281	0.00517	-2.28651	DLNQNPNG
FalsePositive	ACK37418	139	146	0.0052	-2.284	TWSQSSKG
FalsePositive	AJO54282	140	147	0.0052	-2.284	ATSNGWWW
FalsePositive	YP_009020973	201	208	0.0052	-2.284	IQAQSNPT
FalsePositive	AAQ73077	204	211	0.0052	-2.284	ADPEGTVT
FalsePositive	AGT57426	602	609	0.0052	-2.284	ASDEGLIE
FalsePositive	AFR11453	639	646	0.0052	-2.284	STYQSMDT
FalsePositive	ABF51182	647	654	0.0052	-2.284	TEIQNKRP
FalsePositive	ACK37392	658	665	0.0052	-2.284	ADRQAYNA
FalsePositive	ACK37400	729	736	0.0052	-2.284	FTWQSGTN
FalsePositive	AMD82548	792	799	0.0052	-2.284	VNEQSLGV
FalsePositive	AAQ73093	875	882	0.0052	-2.284	VDWENCVW
FalsePositive	CAE12178	1363	1370	0.0052	-2.284	TYSQNGKI
FalsePositive	ABF51198	13	20	0.00523	-2.2815	HSTQNAVT
FalsePositive	ACK37418	13	20	0.00523	-2.2815	HENQNFLT
FalsePositive	AKJ87738	160	167	0.00523	-2.2815	LFGQNLYY
FalsePositive	ABO69373	402	409	0.00523	-2.2815	LTKQSPGH
FalsePositive	AAS86317	564	571	0.00523	-2.2815	ALKQAVHK
FalsePositive	BAG70419	767	774	0.00523	-2.2815	HFNQSGVY
FalsePositive	ACY40750	839	846	0.00523	-2.2815	TTRQSITT
FalsePositive	ABM54523	882	889	0.00523	-2.2815	IGHQNKAV
FalsePositive	ABM54517	885	892	0.00523	-2.2815	FGHQNKGI
FalsePositive	AVJ35777	912	919	0.00523	-2.2815	VTFEGPGI
FalsePositive	ABV25903	1589	1596	0.00523	-2.2815	IWMEGKQV
FalsePositive	AJO54283	1749	1756	0.00523	-2.2815	AMNENIHI
FalsePositive	ABF51180	138	145	0.00526	-2.27901	KTWQNSSK
FalsePositive	AUF49624	233	240	0.00526	-2.27901	GAVQNAVH
FalsePositive	ACK37428	1026	1033	0.00526	-2.27901	SELQNITM
FalsePositive	ACU00186	1143	1150	0.00526	-2.27901	ATEQAQNE
FalsePositive	AGC03216	1169	1176	0.00526	-2.27901	TIDQSAPS
FalsePositive	AJO54281	1259	1266	0.00526	-2.27901	DIGQNPDG
FalsePositive	AMB57003	1353	1360	0.00526	-2.27901	MYSQNGRI
FalsePositive	YP_007985635	199	206	0.00529	-2.27654	HKIQSQQT
FalsePositive	ATV91596	223	230	0.00529	-2.27654	QFEQNAAT
FalsePositive	AJF23329	233	240	0.00529	-2.27654	NTVQSIVT
FalsePositive	AGT57426	284	291	0.00529	-2.27654	AYAEGSTT
FalsePositive	ALB72948	396	403	0.00529	-2.27654	VRAQSNVD
FalsePositive	AUF49632	563	570	0.00529	-2.27654	ISQQNFLQ
FalsePositive	AAQ73083	728	735	0.00529	-2.27654	YSWQSSTN
FalsePositive	ACK37408	798	805	0.00529	-2.27654	TEQQSNTV
FalsePositive	AEI99575	865	872	0.00529	-2.27654	FWQQSGAI
FalsePositive	AFR11453	880	887	0.00529	-2.27654	NDWENCVW
FalsePositive	AUO29149	925	932	0.00529	-2.27654	INFEGPGF
FalsePositive	ABU62848	931	938	0.00529	-2.27654	MIGEGHCQ
FalsePositive	AJO54283	956	963	0.00529	-2.27654	AGGEGHVA
FalsePositive	AGC00381	1011	1018	0.00529	-2.27654	DYIQNLGN
FalsePositive	ABF51195	1415	1422	0.00529	-2.27654	ISMEGPPP
FalsePositive	AHG06624	692	699	0.00532	-2.27409	SVDQNNRF
FalsePositive	AVK51671	697	704	0.00532	-2.27409	NRFQAMYV
FalsePositive	AUD09263	799	806	0.00532	-2.27409	ASNEGDSL
FalsePositive	CAC07403	880	887	0.00532	-2.27409	YGHQNKAV
FalsePositive	ABM21514	888	895	0.00532	-2.27409	FGHQNKGV
FalsePositive	AJB44634	986	993	0.00532	-2.27409	DYVQNLGN
FalsePositive	ABF51179	1481	1488	0.00532	-2.27409	AVNQASMI
FalsePositive	AAQ02681	13	20	0.00535	-2.27165	HENQNIAA
FalsePositive	AAX47040	764	771	0.00535	-2.27165	HFTQSGGY
FalsePositive	ABF51195	793	800	0.00535	-2.27165	DEHQNRVE
FalsePositive	AAX47034	1171	1178	0.00535	-2.27165	MIEQSAPS
FalsePositive	AJD14709	233	240	0.00538	-2.26922	GAVQNVVH
FalsePositive	AFO83469	347	354	0.00538	-2.26922	DEYQSPTA
FalsePositive	CAA56365	369	376	0.00538	-2.26922	GEVQNLME
FalsePositive	AAQ02675	570	577	0.00538	-2.26922	HVIQNNAV
FalsePositive	AAQ02675	602	609	0.00538	-2.26922	NTTQSGPT
FalsePositive	BAE20393	611	618	0.00538	-2.26922	NTVQSTPE
FalsePositive	QEG13944	644	651	0.00538	-2.26922	ASSEGRTY
FalsePositive	ACK37428	934	941	0.00538	-2.26922	IWIEGNSY
FalsePositive	AFK79845	1428	1435	0.00538	-2.26922	CESEGWIK
FalsePositive	ABF51202	13	20	0.00542	-2.266	HTTQNAVS
FalsePositive	AMD82548	160	167	0.00542	-2.266	LFGQNMEY
FalsePositive	AUF49661	416	423	0.00542	-2.266	GPWQSTTV
FalsePositive	AEO51782	610	617	0.00542	-2.266	NTLQNTPA
FalsePositive	ACK37407	647	654	0.00542	-2.266	TEIQNKKP
FalsePositive	AAZ73345	693	700	0.00542	-2.266	TTEQSTTY
FalsePositive	AUN27642	857	864	0.00542	-2.266	PDLQNYGA
FalsePositive	AGA18493	860	867	0.00542	-2.266	DYKQNSPV
FalsePositive	ALP31156	932	939	0.00542	-2.266	IYFEGPGI
FalsePositive	AJD77367	1106	1113	0.00542	-2.266	PIAQNQSA
FalsePositive	AKA64452	1260	1267	0.00542	-2.266	DLNQNPDG
FalsePositive	AEL31291	1363	1370	0.00542	-2.266	VVLQNRRT
FalsePositive	AIZ97149	396	403	0.00545	-2.2636	VQSQSEKG
FalsePositive	ABV25903	397	404	0.00545	-2.2636	VSVQSEVD
FalsePositive	AIN45139	504	511	0.00545	-2.2636	RYVQSDAY
FalsePositive	ADO24588	1026	1033	0.00545	-2.2636	TELQNMSL
FalsePositive	AMB19800	1929	1936	0.00545	-2.2636	VWFQALGR
FalsePositive	AMD82549	2151	2158	0.00545	-2.2636	AWHNGEHD
FalsePositive	AHK24839	5	12	0.00548	-2.26122	VSKQSNGT
FalsePositive	AMB19798	345	352	0.00548	-2.26122	EDEQSPNI
FalsePositive	ABV25903	580	587	0.00548	-2.26122	NTIQSAGT
FalsePositive	ACK37397	588	595	0.00548	-2.26122	NIKQSQAT
FalsePositive	AVE14262	903	910	0.00548	-2.26122	EDLQNAVC
FalsePositive	CRL46950	1350	1357	0.00548	-2.26122	MYSQNGKI
FalsePositive	ATZ76015	1942	1949	0.00548	-2.26122	VWFQALKR
FalsePositive	APU57649	1948	1955	0.00548	-2.26122	MILQNLEF
FalsePositive	AUD08530	401	408	0.00551	-2.25885	IPVQSGNH
FalsePositive	ADK22846	418	425	0.00551	-2.25885	TKDQSIFS
FalsePositive	AAW30683	534	541	0.00551	-2.25885	APTQARII
FalsePositive	ABM54550	589	596	0.00551	-2.25885	TVAQNALQ
FalsePositive	ACI25379	592	599	0.00551	-2.25885	PTGQNTQV
FalsePositive	ABM54547	601	608	0.00551	-2.25885	PQKQSTAQ
FalsePositive	ABM21509	611	618	0.00551	-2.25885	NTNQSTPA
FalsePositive	ABO69373	621	628	0.00551	-2.25885	RYVQNTQT
FalsePositive	ABV69564	693	700	0.00551	-2.25885	TQEQSSVQ
FalsePositive	AFK29633	931	938	0.00551	-2.25885	VSFEGPGP
FalsePositive	ABO69374	1024	1031	0.00551	-2.25885	EHVQSINP
FalsePositive	ACD78144	2102	2109	0.00551	-2.25885	PADQSATF
FalsePositive	APQ46501	386	393	0.00555	-2.25571	NSTQSNIG
FalsePositive	ABC84488	496	503	0.00555	-2.25571	VGLQSSCT
FalsePositive	AFO83469	569	576	0.00555	-2.25571	NDVQSAVE
FalsePositive	AFQ55937	602	609	0.00555	-2.25571	NTVQSGPT
FalsePositive	ANV28265	799	806	0.00555	-2.25571	AATEGDSL
FalsePositive	AMB19798	1246	1253	0.00555	-2.25571	DVGQNPDG
FalsePositive	AAQ04834	1279	1286	0.00555	-2.25571	AEKEGTST
FalsePositive	ACK37411	139	146	0.00558	-2.25337	EWTQNSKG
FalsePositive	AEO51785	232	239	0.00558	-2.25337	ASAQANPT
FalsePositive	APT69812	654	661	0.00558	-2.25337	ITIQNNVE
FalsePositive	ACK37391	793	800	0.00558	-2.25337	DEHQNKVE
FalsePositive	ABK20867	799	806	0.00558	-2.25337	ASTEGDSL
FalsePositive	AJK93552	864	871	0.00558	-2.25337	KCGQNSAY
FalsePositive	ANA57377	888	895	0.00558	-2.25337	LGHQNMAV
FalsePositive	ANZ02994	939	946	0.00558	-2.25337	ARYQANVL
FalsePositive	AKE33318	1353	1360	0.00558	-2.25337	MYSQNGKV
FalsePositive	ACK37403	1775	1782	0.00558	-2.25337	EITQNMRV
FalsePositive	AAT65964	229	236	0.00561	-2.25104	VSSQNGVQ
FalsePositive	ARM53611	822	829	0.00561	-2.25104	FTTQNSMV
FalsePositive	ACK37388	1414	1421	0.00561	-2.25104	IDMQAPPP
FalsePositive	NP_040760	1727	1734	0.00561	-2.25104	MLLQNYFT
FalsePositive	ABF51185	370	377	0.00565	-2.24795	GQVQNLIE
FalsePositive	AUD08532	406	413	0.00565	-2.24795	GNHQSTQV
FalsePositive	BAK57453	470	477	0.00565	-2.24795	SPPQNRKQ
FalsePositive	ACK37391	727	734	0.00565	-2.24795	FAWQSGTN
FalsePositive	AAP37263	904	911	0.00565	-2.24795	EDMQNAVS
FalsePositive	ACU00186	957	964	0.00565	-2.24795	AGGEGHAA
FalsePositive	AFK79845	1362	1369	0.00565	-2.24795	VVLQNKRT
FalsePositive	NP_653149	366	373	0.00568	-2.24565	VQIEGIME
FalsePositive	ABU62850	386	393	0.00568	-2.24565	NVNQSQAI
FalsePositive	AIZ97150	694	701	0.00568	-2.24565	TQQQSTAP
FalsePositive	YP_003358790	719	726	0.00568	-2.24565	YLWQSGTN
FalsePositive	APT69842	731	738	0.00568	-2.24565	FSWQSGTN
FalsePositive	AMB19799	888	895	0.00568	-2.24565	CATEGPDR
FalsePositive	ABM54544	1194	1201	0.00568	-2.24565	TIHQACPS
FalsePositive	YP_001552411	1326	1333	0.00568	-2.24565	QGYQNQVG
FalsePositive	ACK37410	1943	1950	0.00568	-2.24565	VWFQALKE
FalsePositive	ACK37405	230	237	0.00571	-2.24336	RVYQNKQP
FalsePositive	BAW98045	374	381	0.00571	-2.24336	ADAEGVAR
FalsePositive	NP_042242	379	386	0.00571	-2.24336	NNLQSNET
FalsePositive	ABM21510	480	487	0.00571	-2.24336	QPPQNRKD
FalsePositive	NP_653149	611	618	0.00571	-2.24336	RAVQNRHR
FalsePositive	AEO51781	611	618	0.00571	-2.24336	NTTQSSPE
FalsePositive	AAQ04835	724	731	0.00571	-2.24336	YYSQSSGH
FalsePositive	ACK37408	733	740	0.00571	-2.24336	DEWQSGTN
FalsePositive	ADK22846	879	886	0.00571	-2.24336	FGHQNKAI
FalsePositive	AGC54436	922	929	0.00571	-2.24336	VNFEGPGL
FalsePositive	AAQ73088	928	935	0.00571	-2.24336	VSFEGPGI
FalsePositive	ACK37408	1774	1781	0.00571	-2.24336	EITQNMKI
FalsePositive	ATZ76014	1942	1949	0.00571	-2.24336	VWFQALKK
FalsePositive	APR72754	222	229	0.00575	-2.24033	SFEQNAAT
FalsePositive	ACK37374	298	305	0.00575	-2.24033	CQLEGDPP
FalsePositive	ADW78250	386	393	0.00575	-2.24033	VSTQSDLD
FalsePositive	AAL69631	390	397	0.00575	-2.24033	ISVQSDID
FalsePositive	ACK37388	486	493	0.00575	-2.24033	VGLQSTCS
FalsePositive	ABF51179	593	600	0.00575	-2.24033	KHTQSVPA
FalsePositive	ABL61316	649	656	0.00575	-2.24033	KVQQNFFK
FalsePositive	BAK57453	728	735	0.00575	-2.24033	FAWQSSTN
FalsePositive	AFR46521	902	909	0.00575	-2.24033	EDMQNAVA
FalsePositive	ARA15405	936	943	0.00575	-2.24033	IWIEGGPY
FalsePositive	ACS34685	1740	1747	0.00575	-2.24033	YFNQSQGE
FalsePositive	ACK37392	1775	1782	0.00575	-2.24033	KITQNMEV
FalsePositive	ABF51179	1980	1987	0.00575	-2.24033	SLIQSICN
FalsePositive	AAQ73089	160	167	0.00578	-2.23807	LFGQNMAY
FalsePositive	AFK79845	323	330	0.00578	-2.23807	GAKQNQTQ
FalsePositive	ABO69374	350	357	0.00578	-2.23807	DDNQSPSA
FalsePositive	AIY27444	417	424	0.00578	-2.23807	GPWQSTIL
FalsePositive	AEL31289	559	566	0.00578	-2.23807	MMQQSGTL
FalsePositive	NP_653149	714	721	0.00578	-2.23807	YLWQSSTN
FalsePositive	AAX47044	892	899	0.00578	-2.23807	TDWENCVW
FalsePositive	ABO69380	951	958	0.00578	-2.23807	SRFQSGVM
FalsePositive	AHK24839	1183	1190	0.00578	-2.23807	KIQQNLKQ
FalsePositive	ACU00185	5	12	0.00581	-2.23582	VSKQNTGS
FalsePositive	AFQ55937	142	149	0.00581	-2.23582	AGSRGWWW
FalsePositive	ANZ02994	393	400	0.00581	-2.23582	VSVQSAVD
FalsePositive	AAQ73080	487	494	0.00581	-2.23582	VGLQSSCV
FalsePositive	AUO29151	739	746	0.00581	-2.23582	FWTEGCAP
FalsePositive	ALB72947	834	841	0.00581	-2.23582	KKYQSYSQ
FalsePositive	AFQ55937	877	884	0.00581	-2.23582	FGHQNKAV
FalsePositive	ABO69371	1940	1947	0.00581	-2.23582	VWFQALEK
FalsePositive	ASW20957	13	20	0.00585	-2.23284	HENQNVAA
FalsePositive	ABF51184	346	353	0.00585	-2.23284	DDRQSPSA
FalsePositive	AQZ26611	395	402	0.00585	-2.23284	VSSQNRAD
FalsePositive	ACK37409	593	600	0.00585	-2.23284	KYTQSVPT
FalsePositive	BBD13572	678	685	0.00585	-2.23284	VLTQNGNK
FalsePositive	NP_041009	937	944	0.00585	-2.23284	IWIEGSPY
FalsePositive	ABO69377	994	1001	0.00585	-2.23284	DMFQAEYQ
FalsePositive	AAT65951	639	646	0.00588	-2.23062	STYQSMDS
FalsePositive	AFD32987	830	837	0.00588	-2.23062	LRSQNYTM
FalsePositive	AFV92903	11	18	0.00592	-2.22768	GTHQNSNS
FalsePositive	AQX36825	13	20	0.00592	-2.22768	HSTQNAVS
FalsePositive	ACK37380	13	20	0.00592	-2.22768	HENQNFLS
FalsePositive	AAQ73089	400	407	0.00592	-2.22768	IPVQSVTQ
FalsePositive	ABO69376	657	664	0.00592	-2.22768	PRKEGDRM
FalsePositive	APX43287	941	948	0.00592	-2.22768	KRHQSHVL
FalsePositive	ABO69379	946	953	0.00592	-2.22768	SRYQSGVM
FalsePositive	ACI23463	2142	2149	0.00592	-2.22768	AWHNGEHE
FalsePositive	ACK37408	470	477	0.00595	-2.22548	GKPQNRTQ
FalsePositive	ACK37408	513	520	0.00595	-2.22548	AYSQAGFI
FalsePositive	AGH30715	592	599	0.00595	-2.22548	PTGQNTRV
FalsePositive	AVI00675	687	694	0.00595	-2.22548	TNNEGLMQ
FalsePositive	ALB73002	850	857	0.00595	-2.22548	KDRQNIKT
FalsePositive	YP_009020973	924	931	0.00595	-2.22548	ERYQSHVI
FalsePositive	CAE12182	233	240	0.00599	-2.22257	HTVQSIVT
FalsePositive	AIB00487	906	913	0.00599	-2.22257	EDLQNAVH
FalsePositive	AGA18496	1056	1063	0.00599	-2.22257	DTVQNVIT
FalsePositive	ALB73006	1473	1480	0.00599	-2.22257	CIEEGWLV
FalsePositive	AQX83084	1532	1539	0.00599	-2.22257	APKQALKR
FalsePositive	AAD22045	1995	2002	0.00599	-2.22257	CLIEGINH
FalsePositive	ABV69564	386	393	0.00602	-2.2204	NNTEGNVM
FalsePositive	ACK37377	561	568	0.00602	-2.2204	LHKQSAPI
FalsePositive	APA32000	767	774	0.00602	-2.2204	HFSQSGSY
FalsePositive	AUF49657	840	847	0.00602	-2.2204	TTRQSITA
FalsePositive	AQM32742	1394	1401	0.00602	-2.2204	APRQALKK
FalsePositive	AIB00630	1740	1747	0.00602	-2.2204	YFTQSQGE
FalsePositive	ACK37388	13	20	0.00606	-2.21753	HSTQNTVT
FalsePositive	ACK37399	13	20	0.00606	-2.21753	HSTQNVVS
FalsePositive	ACK37392	348	355	0.00606	-2.21753	DDTQSPSA
FalsePositive	AAR38847	395	402	0.00606	-2.21753	VSAQNKAD
FalsePositive	AFO64932	402	409	0.00606	-2.21753	IPVQSNSD
FalsePositive	AAA45756	647	654	0.00606	-2.21753	TEIQNKDA
FalsePositive	AEL31291	1145	1152	0.00606	-2.21753	EEAQNELC
FalsePositive	YP_009243645	199	206	0.0061	-2.21467	HKIQSATT
FalsePositive	AQM32742	257	264	0.0061	-2.21467	VSSQNKAD
FalsePositive	ADE80724	584	591	0.0061	-2.21467	ALTQALPT
FalsePositive	BAD95475	594	601	0.0061	-2.21467	TTAQNTQA
FalsePositive	AHV82108	663	670	0.0061	-2.21467	TGTQNTDG
FalsePositive	APT69848	852	859	0.0061	-2.21467	CGQQSGAV
FalsePositive	AFN53722	926	933	0.0061	-2.21467	CNCQAGVY
FalsePositive	ALB72943	1296	1303	0.0061	-2.21467	DLCQNRDG
FalsePositive	AEL31291	137	144	0.00613	-2.21254	RWTQNSLG
FalsePositive	ABK88241	138	145	0.00613	-2.21254	VKWEGTST
FalsePositive	NP_653149	160	167	0.00613	-2.21254	LFGQNVQY
FalsePositive	ANP43768	233	240	0.00613	-2.21254	GAVQNAVY
FalsePositive	ABU41835	569	576	0.00613	-2.21254	HISQSAII
FalsePositive	AUD09270	571	578	0.00613	-2.21254	HIEQNALA
FalsePositive	AAQ02682	598	605	0.00613	-2.21254	STQQSLPN
FalsePositive	YP_009246449	818	825	0.00613	-2.21254	PIRQAPYK
FalsePositive	AIM41612	867	874	0.00613	-2.21254	DFKQNSIT
FalsePositive	ALB72926	1469	1476	0.00613	-2.21254	EVRQSCRD
FalsePositive	AUF49676	2154	2161	0.00613	-2.21254	AWHNGEYE
FalsePositive	ALF95160	13	20	0.00617	-2.20971	HENQNLAA
FalsePositive	AAS86317	332	339	0.00617	-2.20971	DDFQAPCI
FalsePositive	CAC82172	406	413	0.00617	-2.20971	GNHQSSQV
FalsePositive	ACK37414	768	775	0.00617	-2.20971	DTYQSRYG
FalsePositive	ADK22846	950	957	0.00617	-2.20971	VSVEGPTF
FalsePositive	AUF49642	1353	1360	0.00617	-2.20971	IYSQNGKI
FalsePositive	AAM09803	1743	1750	0.00617	-2.20971	YFIQSQGE
FalsePositive	APT69837	1943	1950	0.00617	-2.20971	VWFQALKS
FalsePositive	ARC95292	386	393	0.00621	-2.20691	VSTQSELD
FalsePositive	ADO24588	399	406	0.00621	-2.20691	PLTQNKQG
FalsePositive	YP_009344963	534	541	0.00621	-2.20691	VAAQSNFS
FalsePositive	ABF51184	552	559	0.00621	-2.20691	KDTQSIQQ
FalsePositive	ALF95160	627	634	0.00621	-2.20691	ASGQAIPS
FalsePositive	AIT52325	644	651	0.00621	-2.20691	ASSEGRTD
FalsePositive	ACK37426	697	704	0.00621	-2.20691	AAIEGDLG
FalsePositive	AGW83676	881	888	0.00621	-2.20691	SGHQNKAV
FalsePositive	CRL46950	922	929	0.00621	-2.20691	VIFEGPGL
FalsePositive	AAF81252	943	950	0.00621	-2.20691	KKHQSHVL
FalsePositive	ABM54542	967	974	0.00621	-2.20691	QYMEGNEY
FalsePositive	ABV25904	1034	1041	0.00621	-2.20691	REIQNIKD
FalsePositive	YP_009028564	1159	1166	0.00621	-2.20691	TLEQSAPS
FalsePositive	AGS09865	1743	1750	0.00621	-2.20691	YFVQSQGE
FalsePositive	AKL88020	214	221	0.00624	-2.20482	ALSEGEQA
FalsePositive	AUD08532	561	568	0.00624	-2.20482	FIEQNAIL
FalsePositive	ABK41189	766	773	0.00624	-2.20482	HFSQSGVY
FalsePositive	BAG70421	852	859	0.00624	-2.20482	RTMQSVTT
FalsePositive	ABV25903	1030	1037	0.00624	-2.20482	REVQNIKD
FalsePositive	AJC11330	1528	1535	0.00624	-2.20482	APKQALKK
FalsePositive	AAR38847	241	248	0.00628	-2.20204	PLSQSLIY
FalsePositive	AFQ55916	575	582	0.00628	-2.20204	DTQQSSHN
FalsePositive	AGX93074	885	892	0.00628	-2.20204	FGHQNGAV
FalsePositive	AAF81252	925	932	0.00628	-2.20204	VTFEGPSL
FalsePositive	AOG61490	1134	1141	0.00628	-2.20204	EWPQSKIL
FalsePositive	AFR77805	1173	1180	0.00628	-2.20204	NIEQSAAS
FalsePositive	AJD80555	1369	1376	0.00628	-2.20204	MSSQNVKI
FalsePositive	APT69810	1938	1945	0.00628	-2.20204	IWFQALKQ
FalsePositive	AFV92902	2166	2173	0.00628	-2.20204	AWHNGPVE
FalsePositive	BAW98047	199	206	0.00632	-2.19928	HKIQSAET
FalsePositive	ABV25903	241	248	0.00632	-2.19928	ALSQALIY
FalsePositive	ABO69373	368	375	0.00632	-2.19928	GQVQNLSE
FalsePositive	ALB73005	400	407	0.00632	-2.19928	IPVQSNST
FalsePositive	AAQ73097	533	540	0.00632	-2.19928	TPQQSTIL
FalsePositive	AIN45139	557	564	0.00632	-2.19928	FISQNNLY
FalsePositive	ACK37415	656	663	0.00632	-2.19928	YNTQSFTK
FalsePositive	AAQ04841	698	705	0.00632	-2.19928	KLSQNMPV
FalsePositive	AGA12372	799	806	0.00632	-2.19928	ASAEGDSL
FalsePositive	AUF49628	923	930	0.00632	-2.19928	VKFEGPGL
FalsePositive	NP_040760	1018	1025	0.00632	-2.19928	DYIQNLGS
FalsePositive	ABF51200	1030	1037	0.00632	-2.19928	DQIQSINP
FalsePositive	ABU62849	1154	1161	0.00632	-2.19928	EIFQNELT
FalsePositive	BAG70421	103	110	0.00635	-2.19723	AYGQWPQY
FalsePositive	AVM86032	160	167	0.00635	-2.19723	LFGQNMLY
FalsePositive	APT69843	399	406	0.00635	-2.19723	PLYQSRQG
FalsePositive	ABF51195	485	492	0.00635	-2.19723	VGLQSTMS
FalsePositive	AEO51786	611	618	0.00635	-2.19723	DTQQSAPV
FalsePositive	ABM21508	611	618	0.00635	-2.19723	NTLQSTPE
FalsePositive	APQ46501	656	663	0.00635	-2.19723	YNDQSFTK
FalsePositive	ABF51190	767	774	0.00635	-2.19723	EQGQNYGT
FalsePositive	ASW23000	774	781	0.00635	-2.19723	EDEQNNDV
FalsePositive	AFD32988	924	931	0.00635	-2.19723	VTFEGPGL
FalsePositive	NP_040760	990	997	0.00635	-2.19723	AGGEGIVA
FalsePositive	AUF49674	226	233	0.00639	-2.1945	STTQSDQT
FalsePositive	AUF49662	395	402	0.00639	-2.1945	VSAQSAVD
FalsePositive	ASW23000	645	652	0.00639	-2.1945	FQLQNKFR
FalsePositive	AIG13042	918	925	0.00639	-2.1945	CDCQAGVY
FalsePositive	ARC95293	1460	1467	0.00639	-2.1945	TSEQSVQG
FalsePositive	YP_001552411	1780	1787	0.00639	-2.1945	TMEQAIYG
FalsePositive	AMB19800	5	12	0.00643	-2.19179	VSRQSVGS
FalsePositive	ABL61316	138	145	0.00643	-2.19179	VKWEGTSK
FalsePositive	AAX47038	142	149	0.00643	-2.19179	ANSPGWWW
FalsePositive	ACK37386	202	209	0.00643	-2.19179	ASIEGGNV
FalsePositive	ACK37370	298	305	0.00643	-2.19179	CPLQSSGT
FalsePositive	ACZ28901	597	604	0.00643	-2.19179	PKPQSNLP
FalsePositive	ASM58485	663	670	0.00643	-2.19179	MGTQNTDG
FalsePositive	AVI00674	822	829	0.00643	-2.19179	EPEQNLRN
FalsePositive	AJF23329	842	849	0.00643	-2.19179	EKRQSINY
FalsePositive	ABV25904	943	950	0.00643	-2.19179	VHVQANEY
FalsePositive	ABU62848	1251	1258	0.00643	-2.19179	DLGQNPDG
FalsePositive	AEB33908	160	167	0.00647	-2.1891	LFGQNLQY
FalsePositive	ADO24588	202	209	0.00647	-2.1891	ASVEGGNV
FalsePositive	AMD82547	417	424	0.00647	-2.1891	GPWQSTLI
FalsePositive	AGC23343	417	424	0.00647	-2.1891	GPWQSTTL
FalsePositive	AGU38786	488	495	0.00647	-2.1891	TGLQSSCV
FalsePositive	ALC74273	571	578	0.00647	-2.1891	HIGQSTPI
FalsePositive	ARO77045	647	654	0.00647	-2.1891	TEIQNKLP
FalsePositive	ACK37436	700	707	0.00647	-2.1891	IAAQNEGV
FalsePositive	APT69826	1154	1161	0.00647	-2.1891	ETFQNELT
FalsePositive	ABF51206	1246	1253	0.00647	-2.1891	YDQQSVVI
FalsePositive	ABV25904	6	13	0.0065	-2.18709	STQQSGTH
FalsePositive	AUF49648	390	397	0.0065	-2.18709	THMEGTDA
FalsePositive	ACT31466	571	578	0.0065	-2.18709	HISQSTPI
FalsePositive	AAQ73097	692	699	0.0065	-2.18709	STNQNQDA
FalsePositive	AMB19798	571	578	0.00654	-2.18442	RTLQNAMA
FalsePositive	ACK37403	655	662	0.00654	-2.18442	HDHEGQNV
FalsePositive	AFV83532	720	727	0.00654	-2.18442	PVPQSATS
FalsePositive	ABF51186	773	780	0.00654	-2.18442	DSAQSHYG
FalsePositive	AHJ40480	923	930	0.00654	-2.18442	VVFEGPGL
FalsePositive	AZL41614	932	939	0.00654	-2.18442	IRFEGPGI
FalsePositive	ABF51182	228	235	0.00658	-2.18177	AEKEGGAT
FalsePositive	AQM32742	278	285	0.00658	-2.18177	GPWQSTLV
FalsePositive	ACZ13359	597	604	0.00658	-2.18177	PKPQNSLP
FalsePositive	AUF49632	840	847	0.00658	-2.18177	TTRQSVTA
FalsePositive	AJD80555	851	858	0.00658	-2.18177	TIVQSKRR
FalsePositive	AHK24836	941	948	0.00658	-2.18177	IWIEGGNY
FalsePositive	APT69823	1118	1125	0.00658	-2.18177	PAVQSKKQ
FalsePositive	ACK37420	1750	1757	0.00658	-2.18177	NVFEGNKQ
FalsePositive	ABF51186	13	20	0.00662	-2.17914	HSTQNSVT
FalsePositive	AAR38849	394	401	0.00662	-2.17914	IPVQSQSE
FalsePositive	ACN59569	482	489	0.00662	-2.17914	FWLQSSVT
FalsePositive	AFR46521	600	607	0.00662	-2.17914	PTVQNTAS
FalsePositive	BAM71656	605	612	0.00662	-2.17914	HTVQSTPS
FalsePositive	AAX47037	728	735	0.00662	-2.17914	FWSEGCAP
FalsePositive	ADW78250	819	826	0.00662	-2.17914	FEIQNKIV
FalsePositive	AUF49672	951	958	0.00662	-2.17914	AEVQASEY
FalsePositive	ASW23001	960	967	0.00662	-2.17914	AGGEGYAA
FalsePositive	AAS86317	1598	1605	0.00662	-2.17914	KLRQNEKF
FalsePositive	ABF51202	1771	1778	0.00662	-2.17914	EITQNMLT
FalsePositive	AKR53677	18	25	0.00666	-2.17653	AATEGSTI
FalsePositive	AIN45140	569	576	0.00666	-2.17653	GDVQNAVE
FalsePositive	ACK37438	653	660	0.00666	-2.17653	VEYEGYDD
FalsePositive	ACK37388	696	703	0.00666	-2.17653	AATEGNLG
FalsePositive	BAW98047	924	931	0.00666	-2.17653	ERYQSHVA
FalsePositive	ANY27029	941	948	0.00666	-2.17653	RRYQSHVL
FalsePositive	ACK37406	962	969	0.00666	-2.17653	LMGEGPCE
FalsePositive	ADK22846	1056	1063	0.00666	-2.17653	ETVQNVIT
FalsePositive	ALB72927	1469	1476	0.00666	-2.17653	EVRQSCRE
FalsePositive	ACK37402	1943	1950	0.00666	-2.17653	MWFQALKE
FalsePositive	AAZ73343	38	45	0.0067	-2.17393	SDAQNKQD
FalsePositive	AVM86034	390	397	0.0067	-2.17393	INLQSMDA
FalsePositive	AAA65044	488	495	0.0067	-2.17393	IGLQSRCV
FalsePositive	ACK37390	830	837	0.0067	-2.17393	FKIQNRDI
FalsePositive	AIT52325	883	890	0.0067	-2.17393	EERQSAIY
FalsePositive	CAC07403	903	910	0.0067	-2.17393	EDIQNAVN
FalsePositive	ABO69381	935	942	0.0067	-2.17393	IWIEGSNY
FalsePositive	AHJ40480	1753	1760	0.0067	-2.17393	HVFEGCKE
FalsePositive	AAQ73097	214	221	0.00673	-2.17198	ALSEGERA
FalsePositive	ACK37428	530	537	0.00673	-2.17198	ETNQSVYI
FalsePositive	ABU41836	599	606	0.00673	-2.17198	SAQQSLPD
FalsePositive	ACK37430	934	941	0.00673	-2.17198	LWIEGNNH
FalsePositive	AFK79845	5	12	0.00677	-2.16941	VSKQSVGA
FalsePositive	AUD08544	406	413	0.00677	-2.16941	GNRQSAQV
FalsePositive	ACI23463	499	506	0.00677	-2.16941	WISQAHYR
FalsePositive	AGX93074	629	636	0.00677	-2.16941	ASGQAVPS
FalsePositive	AGX93075	885	892	0.00677	-2.16941	LGHQNQAV
FalsePositive	AAQ02675	1054	1061	0.00677	-2.16941	NTVQSVLT
FalsePositive	APT69824	1373	1380	0.00677	-2.16941	IILQNRRT
FalsePositive	ADU34211	160	167	0.00681	-2.16685	LFGQNLQF
FalsePositive	ABO69374	298	305	0.00681	-2.16685	CSLQSEAG
FalsePositive	ADW78250	402	409	0.00681	-2.16685	TFNEGSIM
FalsePositive	ACY40750	696	703	0.00681	-2.16685	STTQNQDA
FalsePositive	AAO48740	1285	1292	0.00681	-2.16685	YKQQSVVI
FalsePositive	AFS30772	1678	1685	0.00681	-2.16685	YFAQSQGE
FalsePositive	ABF51194	1943	1950	0.00681	-2.16685	VWFQALKL
FalsePositive	APU57649	13	20	0.00685	-2.16431	HSTQNTVS
FalsePositive	ABM54527	232	239	0.00685	-2.16431	ATTQATRK
FalsePositive	APT69841	347	354	0.00685	-2.16431	DDAQSPSA
FalsePositive	AKD28015	400	407	0.00685	-2.16431	IPVQSIAT
FalsePositive	AVJ35777	500	507	0.00685	-2.16431	VYYQAGYI
FalsePositive	AHY19027	563	570	0.00685	-2.16431	ISQQSFLQ
FalsePositive	BAA00516	904	911	0.00685	-2.16431	EDLQNAIN
FalsePositive	CRL46950	940	947	0.00685	-2.16431	KRFQSHVL
FalsePositive	AOF41450	1012	1019	0.00685	-2.16431	DYIQSLGN
FalsePositive	AAQ02675	1050	1057	0.00685	-2.16431	SEIQNTVQ
FalsePositive	ACK37413	1250	1257	0.00685	-2.16431	YDNQSVVI
FalsePositive	ACK37379	1417	1424	0.00685	-2.16431	ITIEGPPP
FalsePositive	BAW98047	1598	1605	0.00685	-2.16431	KLKQNEKF
FalsePositive	AKE33315	226	233	0.00689	-2.16178	STTQSEQT
FalsePositive	AAO88056	606	613	0.00689	-2.16178	PDTQSSGP
FalsePositive	AEE25815	635	642	0.00689	-2.16178	ASGQAVPA
FalsePositive	AAQ04840	698	705	0.00689	-2.16178	STRQNTDT
FalsePositive	ACK37380	835	842	0.00689	-2.16178	YDPQSKNP
FalsePositive	AIB00525	881	888	0.00689	-2.16178	FGYQNKAV
FalsePositive	ACK37408	906	913	0.00689	-2.16178	TNTEGDDF
FalsePositive	AQZ26611	918	925	0.00689	-2.16178	CECQAGVY
FalsePositive	AKL88020	923	930	0.00689	-2.16178	VAFEGPGL
FalsePositive	AAS86318	986	993	0.00689	-2.16178	DYVQSLGN
FalsePositive	YP_009020973	1258	1265	0.00689	-2.16178	DLLQNPDG
FalsePositive	ARM53611	1463	1470	0.00689	-2.16178	IKEQSVQG
FalsePositive	ABO69371	1589	1596	0.00689	-2.16178	KLDQNEKF
FalsePositive	AAW30682	1809	1816	0.00689	-2.16178	YMTQAANH
FalsePositive	ABO69377	41	48	0.00693	-2.15927	SAGQSFSM
FalsePositive	BAA00518	226	233	0.00693	-2.15927	SATQSDQT
FalsePositive	NP_042288	305	312	0.00693	-2.15927	GGTQSIPI
FalsePositive	AIN45139	531	538	0.00693	-2.15927	VVTQSTIL
FalsePositive	AEE01039	574	581	0.00693	-2.15927	SDTQSSSH
FalsePositive	ACK37394	839	846	0.00693	-2.15927	MPREGDPT
FalsePositive	ALP31106	884	891	0.00693	-2.15927	EEKQSAIY
FalsePositive	AAC00531	922	929	0.00693	-2.15927	VSFEGPGL
FalsePositive	AFQ55937	1000	1007	0.00693	-2.15927	AGGEGVVA
FalsePositive	AEL31291	1115	1122	0.00693	-2.15927	PTVQSKKT
FalsePositive	ACK37406	1366	1373	0.00693	-2.15927	PCNEGKIG
FalsePositive	AEO78972	1748	1755	0.00693	-2.15927	YFTQSRGE
FalsePositive	AEO78969	2173	2180	0.00693	-2.15927	LAWQNGEE
FalsePositive	ACK37392	13	20	0.00697	-2.15677	HSTQNTVA
FalsePositive	ACK37393	22	29	0.00697	-2.15677	GSTQNFTV
FalsePositive	ABO69379	41	48	0.00697	-2.15677	SASQSFSM
FalsePositive	ANJ61721	549	556	0.00697	-2.15677	DIGQSDHL
FalsePositive	AFQ55938	570	577	0.00697	-2.15677	HVIQSNAV
FalsePositive	AEO51785	611	618	0.00697	-2.15677	DTQQSAPA
FalsePositive	AOL02449	702	709	0.00697	-2.15677	AAIEGSNG
FalsePositive	CAD38168	741	748	0.00697	-2.15677	FWTEGNTP
FalsePositive	APT69840	830	837	0.00697	-2.15677	FKIQNKDI
FalsePositive	ABF51186	855	862	0.00697	-2.15677	RAIQNFGP
FalsePositive	AJO54281	885	892	0.00697	-2.15677	SETEGPDH
FalsePositive	ACU00185	1784	1791	0.00697	-2.15677	TMEQAVYG
FalsePositive	BAZ95883	103	110	0.00701	-2.15428	AYGQWPTY
FalsePositive	ABU41836	103	110	0.00701	-2.15428	AYGQWPSY
FalsePositive	APT69839	224	231	0.00701	-2.15428	DVGQNRQN
FalsePositive	AAD22045	482	489	0.00701	-2.15428	FGCQSSVT
FalsePositive	AEL31289	513	520	0.00701	-2.15428	NYTEGGYV
FalsePositive	AHX57651	584	591	0.00701	-2.15428	ALTQALPA
FalsePositive	AEO51782	646	653	0.00701	-2.15428	HVIQSRSR
FalsePositive	AAQ73087	770	777	0.00701	-2.15428	SFRQSGGY
FalsePositive	ANN02908	829	836	0.00701	-2.15428	RSYQSVEQ
FalsePositive	APT69831	838	845	0.00701	-2.15428	VPKEGDIK
FalsePositive	AGC54436	940	947	0.00701	-2.15428	KRYQSHVL
FalsePositive	ACK37393	941	948	0.00701	-2.15428	IWIEGGSY
FalsePositive	ABM21508	1035	1042	0.00701	-2.15428	QGVQSYIE
FalsePositive	ACR14890	1151	1158	0.00701	-2.15428	EAFQNELT
FalsePositive	ABD97877	1785	1792	0.00701	-2.15428	CVFEGVKE
FalsePositive	AIA58173	2169	2176	0.00701	-2.15428	HNGEGEYN
FalsePositive	AAR38849	500	507	0.00705	-2.15181	YRAQSKNQ
FalsePositive	AAQ02677	570	577	0.00705	-2.15181	HITQSALP
FalsePositive	AIA21703	602	609	0.00705	-2.15181	ASDEGLLE
FalsePositive	ACK37401	848	855	0.00705	-2.15181	KSRQNLQT
FalsePositive	ABM21518	860	867	0.00705	-2.15181	DFAQNATA
FalsePositive	ALB72945	1508	1515	0.00705	-2.15181	LIMQSITT
FalsePositive	AFR77805	1803	1810	0.00705	-2.15181	YMIQAANH
FalsePositive	APT69827	202	209	0.00709	-2.14935	ASAEGGNV
FalsePositive	ABF51182	465	472	0.00709	-2.14935	PGTEGPKN
FalsePositive	ANN46839	1034	1041	0.00709	-2.14935	KEVQNMLI
FalsePositive	ARR74572	1359	1366	0.00709	-2.14935	MYSQSGKI
FalsePositive	ALB72969	395	402	0.00713	-2.14691	VSSQNKAG
FalsePositive	ABF51191	405	412	0.00713	-2.14691	STEQSKIF
FalsePositive	ADK22846	741	748	0.00713	-2.14691	PIPQAWDD
FalsePositive	CAA59341	862	869	0.00713	-2.14691	YGHQSGAR
FalsePositive	CAA24446	905	912	0.00713	-2.14691	DDLQNAVN
FalsePositive	ABF51179	936	943	0.00713	-2.14691	IWIEGSSY
FalsePositive	APT69821	1370	1377	0.00713	-2.14691	IVLQNRRT
FalsePositive	AAR38845	398	405	0.00717	-2.14448	VQTQSGEL
FalsePositive	ACK37390	400	407	0.00717	-2.14448	VILQSTIG
FalsePositive	ACK37389	652	659	0.00717	-2.14448	STIQSNEQ
FalsePositive	ABK88241	1036	1043	0.00717	-2.14448	KEIQNMLV
FalsePositive	YP_003358790	415	422	0.00721	-2.14206	GVFQSTYL
FalsePositive	AFS30772	558	565	0.00721	-2.14206	EQPQNKLQ
FalsePositive	ACI23463	693	700	0.00721	-2.14206	SQDQSTIP
FalsePositive	YP_001715611	842	849	0.00721	-2.14206	KNRQSITT
FalsePositive	AJB44634	924	931	0.00721	-2.14206	ERYQSHVL
FalsePositive	AMB19800	101	108	0.00725	-2.13966	AYAQWPEY
FalsePositive	NP_653149	103	110	0.00725	-2.13966	AYGQWPEY
FalsePositive	BAW98045	199	206	0.00725	-2.13966	HKIQSAEA
FalsePositive	AEL31290	225	232	0.00725	-2.13966	GPKQSNDR
FalsePositive	AAW71476	386	393	0.00725	-2.13966	NNTEGKVM
FalsePositive	AAF81252	386	393	0.00725	-2.13966	NNTEGKEM
FalsePositive	AAX47036	387	394	0.00725	-2.13966	NNTEGKME
FalsePositive	BAM71655	605	612	0.00725	-2.13966	HTAQSTPS
FalsePositive	ABU41836	606	613	0.00725	-2.13966	DTNQSLPV
FalsePositive	ABF51185	661	668	0.00725	-2.13966	DSIQNFKK
FalsePositive	AAZ73343	687	694	0.00725	-2.13966	STGQNVTT
FalsePositive	AFK66746	725	732	0.00725	-2.13966	VFFQANNV
FalsePositive	ABF51202	839	846	0.00725	-2.13966	VPQEGDVE
FalsePositive	ABF51201	1362	1369	0.00725	-2.13966	PCKEGKIG
FalsePositive	ALP31137	1721	1728	0.00725	-2.13966	MLLQSYFT
FalsePositive	APT69822	1819	1826	0.00725	-2.13966	KKLQSMID
FalsePositive	AHK24838	2103	2110	0.00725	-2.13966	AWHNGEEQ
FalsePositive	ANY27029	2143	2150	0.00725	-2.13966	AWHNGKHE
FalsePositive	AAQ73091	112	119	0.0073	-2.13668	ADDQATAE
FalsePositive	ARM53611	356	363	0.0073	-2.13668	TNLQAICQ
FalsePositive	AAX49550	386	393	0.0073	-2.13668	HNTEGHVN
FalsePositive	AEO51782	497	504	0.0073	-2.13668	IGLQSSCT
FalsePositive	AMD82094	557	564	0.0073	-2.13668	DAIQNAVT
FalsePositive	ABF51205	559	566	0.0073	-2.13668	LHLQSAPI
FalsePositive	ACK37427	699	706	0.0073	-2.13668	VAVQSGDI
FalsePositive	ABF51197	841	848	0.0073	-2.13668	YVPQNGEV
FalsePositive	BAA00518	851	858	0.0073	-2.13668	TVAQSRRR
FalsePositive	AER29982	860	867	0.0073	-2.13668	DFAQNAVA
FalsePositive	AIB00615	1003	1010	0.0073	-2.13668	AGGEGLVA
FalsePositive	AUN27640	2153	2160	0.0073	-2.13668	AWHHGKED
FalsePositive	ACK37410	349	356	0.00734	-2.1343	DDLQSPSA
FalsePositive	ABV25904	395	402	0.00734	-2.1343	VSVQSSVD
FalsePositive	AMD82094	639	646	0.00734	-2.1343	LNNQNQVV
FalsePositive	AAX47043	642	649	0.00734	-2.1343	TLGQNVEA
FalsePositive	AAF21971	693	700	0.00734	-2.1343	SQEQSTIK
FalsePositive	ACK37420	703	710	0.00734	-2.1343	QPTQSSYS
FalsePositive	AJO54282	704	711	0.00734	-2.1343	PGIEGPKD
FalsePositive	APT69840	767	774	0.00734	-2.1343	EKGQNYGT
FalsePositive	AAR06974	943	950	0.00734	-2.1343	KKYQSHVL
FalsePositive	AAQ73094	233	240	0.00738	-2.13194	NSVQAAVW
FalsePositive	APT69811	469	476	0.00738	-2.13194	EKPQNRKD
FalsePositive	ACZ05039	583	590	0.00738	-2.13194	QMLEGMID
FalsePositive	APT69846	657	664	0.00738	-2.13194	PVAEGNQM
FalsePositive	AUF49622	1057	1064	0.00738	-2.13194	TTVQSVLT
FalsePositive	ABO69380	1486	1493	0.00738	-2.13194	AVNQASTI
FalsePositive	AFR77805	1499	1506	0.00738	-2.13194	MILQSVTT
FalsePositive	AUF49666	1830	1837	0.00738	-2.13194	YGTQNLEA
FalsePositive	CAA74807	402	409	0.00742	-2.1296	SFTEGEIM
FalsePositive	AFQ55937	591	598	0.00742	-2.1296	SITQNALT
FalsePositive	AGA18495	741	748	0.00742	-2.1296	PEPQAWDD
FalsePositive	CAA29172	852	859	0.00742	-2.1296	YGHQSGAV
FalsePositive	AAR38843	1498	1505	0.00742	-2.1296	LVMQSITT
FalsePositive	ABF51206	13	20	0.00746	-2.12726	HSTQNSVS
FalsePositive	AHK12885	482	489	0.00746	-2.12726	SGCQSSVT
FalsePositive	ABF51195	557	564	0.00746	-2.12726	LHKQSGPI
FalsePositive	AEK80016	586	593	0.00746	-2.12726	TLSQSIGR
FalsePositive	APT69824	756	763	0.00746	-2.12726	SHDEGIYG
FalsePositive	AAQ73097	857	864	0.00746	-2.12726	FGHQSGVI
FalsePositive	AGC00381	883	890	0.00746	-2.12726	EERQSATY
FalsePositive	AHK24839	1011	1018	0.00746	-2.12726	QISQSISD
FalsePositive	AFK79845	1387	1394	0.00746	-2.12726	KNRQSVQV
FalsePositive	AUF49645	1754	1761	0.00746	-2.12726	VFHQAFEG
FalsePositive	AEL31289	1933	1940	0.00746	-2.12726	IWFQALGK
FalsePositive	ACK37445	1938	1945	0.00746	-2.12726	IWFQALKE
FalsePositive	AWW18929	2150	2157	0.00746	-2.12726	HNGEGAYN
FalsePositive	ACI23463	232	239	0.0075	-2.12494	TEVQAAVW
FalsePositive	AAA50478	557	564	0.0075	-2.12494	DIEQSANI
FalsePositive	ACK37390	767	774	0.0075	-2.12494	EEGQNYGT
FalsePositive	ABF51181	819	826	0.0075	-2.12494	KHVQAWIP
FalsePositive	AEB33908	859	866	0.0075	-2.12494	NDWENVVW
FalsePositive	AGM16002	866	873	0.0075	-2.12494	TDWENEVW
FalsePositive	ABV00559	880	887	0.0075	-2.12494	FGQQNKAV
FalsePositive	ANC94866	888	895	0.0075	-2.12494	FGHQSKAV
FalsePositive	AUF49642	925	932	0.0075	-2.12494	INFEGPGL
FalsePositive	AAB02228	925	932	0.0075	-2.12494	ISFEGPGI
FalsePositive	AAX47042	935	942	0.0075	-2.12494	VYLEGPGL
FalsePositive	AAD46138	945	952	0.0075	-2.12494	KEYQSHVL
FalsePositive	AFS30772	1115	1122	0.0075	-2.12494	PAVQSKKT
FalsePositive	AFR77803	1804	1811	0.0075	-2.12494	YMIQAASH
FalsePositive	AUO29149	2145	2152	0.0075	-2.12494	AWHNGERD
FalsePositive	AUN27635	396	403	0.00755	-2.12205	VSVQSKTG
FalsePositive	AAF05693	1062	1069	0.00755	-2.12205	LGCEGSPW
FalsePositive	AEJ54593	1508	1515	0.00755	-2.12205	FVVQSITT
FalsePositive	CRL46950	2142	2149	0.00755	-2.12205	AWHNGEQE
FalsePositive	AMB19800	221	228	0.00759	-2.11976	HTIQSSVN
FalsePositive	AAX47034	694	701	0.00759	-2.11976	YQEQSTQL
FalsePositive	AMB19799	822	829	0.00759	-2.11976	TGTEGNYT
FalsePositive	AHJ40480	2143	2150	0.00759	-2.11976	AWHNGEQK
FalsePositive	AUF49636	2145	2152	0.00759	-2.11976	AWHNGEQV
FalsePositive	ARC95292	402	409	0.00763	-2.11748	SFVEGEIM
FalsePositive	ACK37426	404	411	0.00763	-2.11748	RQPQSAVK
FalsePositive	AAX47037	485	492	0.00763	-2.11748	IGLQSSCV
FalsePositive	YP_009505605	549	556	0.00763	-2.11748	DIGQSNHL
FalsePositive	AVJ35777	556	563	0.00763	-2.11748	NPVEGAIN
FalsePositive	APT69842	561	568	0.00763	-2.11748	LHIQSGPI
FalsePositive	APU57649	698	705	0.00763	-2.11748	IASQSENI
FalsePositive	AQM32742	1035	1042	0.00763	-2.11748	NLEQSAAS
FalsePositive	AFR79234	1753	1760	0.00763	-2.11748	HIFEGDKE
FalsePositive	AFR77804	1804	1811	0.00763	-2.11748	YMIQAAKH
FalsePositive	ACU00185	1966	1973	0.00763	-2.11748	YMVEGGMP
FalsePositive	NP_045756	38	45	0.00767	-2.1152	SAAQNKQD
FalsePositive	ABO69376	228	235	0.00767	-2.1152	AAEEGGAS
FalsePositive	AAQ02683	310	317	0.00767	-2.1152	DATQSVPI
FalsePositive	AAQ73092	391	398	0.00767	-2.1152	QNLQSMEA
FalsePositive	ALB73007	562	569	0.00767	-2.1152	FIEQNAAL
FalsePositive	APT69811	587	594	0.00767	-2.1152	DIKQSQST
FalsePositive	AAW72810	605	612	0.00767	-2.1152	PTAQSTPL
FalsePositive	AAQ73076	733	740	0.00767	-2.1152	FWTEGNAP
FalsePositive	AFK66746	821	828	0.00767	-2.1152	NVFQAEDF
FalsePositive	AJC11329	850	857	0.00767	-2.1152	KDRQSIKT
FalsePositive	YP_009353025	1337	1344	0.00767	-2.1152	EVSQNYKT
FalsePositive	ACK37430	1480	1487	0.00767	-2.1152	AVNQATNL
FalsePositive	AMD82094	38	45	0.00771	-2.11295	SASQNKQD
FalsePositive	AAQ73078	390	397	0.00771	-2.11295	GHLQSVDA
FalsePositive	AUD08544	401	408	0.00771	-2.11295	IPVQSGNR
FalsePositive	AEE25815	588	595	0.00771	-2.11295	SVAQNALQ
FalsePositive	ANG56888	885	892	0.00771	-2.11295	EERQSAVY
FalsePositive	AGA18499	1056	1063	0.00771	-2.11295	DTVQSVIT
FalsePositive	AEL31291	1429	1436	0.00771	-2.11295	CEDEGLIR
FalsePositive	ACK37380	41	48	0.00776	-2.11014	SAGQSLSM
FalsePositive	YP_001715611	392	399	0.00776	-2.11014	ISVQSDLD
FalsePositive	NP_653149	458	465	0.00776	-2.11014	RVPQNREE
FalsePositive	AHX57694	592	599	0.00776	-2.11014	STGQNTQV
FalsePositive	ACK37414	622	629	0.00776	-2.11014	RYVQSSQT
FalsePositive	ACK37408	655	662	0.00776	-2.11014	HGEEGVYN
FalsePositive	ABF51191	902	909	0.00776	-2.11014	DCTQATYY
FalsePositive	AEJ54595	1173	1180	0.00776	-2.11014	NLEQSAAA
FalsePositive	ABF51187	1385	1392	0.00776	-2.11014	NNCQAYSL
FalsePositive	YP_009259673	1494	1501	0.00776	-2.11014	LIMQSIAT
FalsePositive	ACR14890	2108	2115	0.00776	-2.11014	AWHNGKQQ
FalsePositive	ABU62848	321	328	0.0078	-2.10791	GARQSVKQ
FalsePositive	YP_001715611	413	420	0.0078	-2.10791	GPWQSTLL
FalsePositive	AFQ55916	721	728	0.0078	-2.10791	VFFQANGV
FalsePositive	AIA21703	819	826	0.0078	-2.10791	FELQNKIV
FalsePositive	ACK37380	933	940	0.0078	-2.10791	LWIEGNNY
FalsePositive	ACU00186	1145	1152	0.0078	-2.10791	EQAQNELR
FalsePositive	AAR38847	1763	1770	0.0078	-2.10791	NVFEGNKE
FalsePositive	ALB72928	1992	1999	0.0078	-2.10791	TLIEGINH
FalsePositive	ABB45874	386	393	0.00784	-2.10568	NNTEGNVN
FalsePositive	APT69838	485	492	0.00784	-2.10568	VGLQSTIS
FalsePositive	AUF49632	738	745	0.00784	-2.10568	FWIEGNAP
FalsePositive	YP_007985635	987	994	0.00784	-2.10568	DNVQSLGN
FalsePositive	AJK93552	1173	1180	0.00784	-2.10568	NLKQSAAS
FalsePositive	ACK37398	1580	1587	0.00784	-2.10568	HNHEGIKL
FalsePositive	ACD78146	346	353	0.00789	-2.10292	NTPEGKQY
FalsePositive	ACF21979	557	564	0.00789	-2.10292	DVEQSANI
FalsePositive	AIN45139	785	792	0.00789	-2.10292	HVNQSTVG
FalsePositive	AGC03216	849	856	0.00789	-2.10292	TTIQSRLT
FalsePositive	AGW83680	903	910	0.00789	-2.10292	EDLQNAVN
FalsePositive	APT69821	1436	1443	0.00789	-2.10292	CEQEGLIA
FalsePositive	ARB07836	2167	2174	0.00789	-2.10292	HEYEGFIE
FalsePositive	BAG82822	115	122	0.00793	-2.10073	VKFEGDTL
FalsePositive	ALB72985	177	184	0.00793	-2.10073	IRVQSNAS
FalsePositive	ACV51798	302	309	0.00793	-2.10073	GSPQSLPI
FalsePositive	ABM21508	570	577	0.00793	-2.10073	HIAQSALP
FalsePositive	AAQ73076	857	864	0.00793	-2.10073	FGHQSGAI
FalsePositive	AMB19800	1118	1125	0.00793	-2.10073	PTVQSKKA
FalsePositive	ANV28236	2169	2176	0.00793	-2.10073	AWHNGEED
FalsePositive	AIN45139	205	212	0.00797	-2.09854	TINQAFTH
FalsePositive	AWW21302	364	371	0.00797	-2.09854	AQVESMME
FalsePositive	ABF51198	564	571	0.00797	-2.09854	HMQEGVLT
FalsePositive	AUD09275	570	577	0.00797	-2.09854	HISQSALP
FalsePositive	AEO78971	605	612	0.00797	-2.09854	HTAQSTPL
FalsePositive	ACK37411	851	858	0.00797	-2.09854	AKRENIMK
FalsePositive	AFK79845	930	937	0.00797	-2.09854	LIGEGPCQ
FalsePositive	ACR14890	1436	1443	0.00797	-2.09854	CEKEGLIV
FalsePositive	ACK37439	1951	1958	0.00797	-2.09854	EILQNLGF
FalsePositive	AEL31290	140	147	0.00802	-2.09583	VGSHGWWW
FalsePositive	ANP43763	298	305	0.00802	-2.09583	NYNEGATA
FalsePositive	AFS30772	346	353	0.00802	-2.09583	EDEQSANI
FalsePositive	AHK24839	388	395	0.00802	-2.09583	NNIEGETT
FalsePositive	AUD08531	561	568	0.00802	-2.09583	FIEQSAIL
FalsePositive	ACK37390	765	772	0.00802	-2.09583	YNEEGQNY
FalsePositive	ACK37398	903	910	0.00802	-2.09583	TNTEGDDI
FalsePositive	ASZ70601	1431	1438	0.00802	-2.09583	CEDEGLIV
FalsePositive	AMB57001	1755	1762	0.00802	-2.09583	HVFEGDKE
FalsePositive	ABU41836	232	239	0.00806	-2.09366	AATQASRK
FalsePositive	AMB19798	484	491	0.00806	-2.09366	LGLQSSCH
FalsePositive	YP_009259673	699	706	0.00806	-2.09366	TTHEGKTP
FalsePositive	AFR67087	854	861	0.00806	-2.09366	FGHQSGAV
FalsePositive	AGW83677	880	887	0.00806	-2.09366	LGHQNKAV
FalsePositive	ADU34211	1334	1341	0.00806	-2.09366	GYVQNGKL
FalsePositive	AJB44634	1334	1341	0.00806	-2.09366	DYVQNGKL
FalsePositive	ACK37423	1415	1422	0.00806	-2.09366	ITLEGPPP
FalsePositive	AFN65690	1500	1507	0.00806	-2.09366	LVMQSVTT
FalsePositive	AHK24839	2107	2114	0.00806	-2.09366	AWHNGEDI
FalsePositive	YP_009353025	219	226	0.0081	-2.09151	TEMQATYE
FalsePositive	ABM54529	232	239	0.0081	-2.09151	ASTQASRK
FalsePositive	ACK37399	560	567	0.0081	-2.09151	LHKQSGII
FalsePositive	AFV83532	590	597	0.0081	-2.09151	SNSEGIPM
FalsePositive	ASU64357	608	615	0.0081	-2.09151	DTLQSRHV
FalsePositive	ABF51203	696	703	0.0081	-2.09151	IASQSNDI
FalsePositive	AJO54281	840	847	0.0081	-2.09151	KILQNAGP
FalsePositive	ATV91596	2143	2150	0.0081	-2.09151	AWHNGERE
FalsePositive	ARM53611	177	184	0.00815	-2.08884	VHVQANAT
FalsePositive	AUO29150	224	231	0.00815	-2.08884	FDSQNTTG
FalsePositive	NP_653149	390	397	0.00815	-2.08884	ISVQSGID
FalsePositive	AAQ73097	560	567	0.00815	-2.08884	ITQQAFYQ
FalsePositive	ATG80398	694	701	0.00815	-2.08884	SQDQSTIS
FalsePositive	ABO69373	698	705	0.00815	-2.08884	ISSQSANI
FalsePositive	ABF51199	904	911	0.00815	-2.08884	TNTEGDDV
FalsePositive	AAX49550	952	959	0.00815	-2.08884	KRYQSYVL
FalsePositive	AQM32742	1362	1369	0.00815	-2.08884	LVMQSIAT
FalsePositive	ACK37380	1479	1486	0.00815	-2.08884	AVNQATSL
FalsePositive	ACK37432	1692	1699	0.00815	-2.08884	MLLQSYFS
FalsePositive	ACZ28902	2166	2173	0.00815	-2.08884	AWHNGEDE
FalsePositive	ACZ67658	225	232	0.00819	-2.08672	GPSQSNDR
FalsePositive	ACK37378	229	236	0.00819	-2.08672	NREQANNQ
FalsePositive	ALB73005	386	393	0.00819	-2.08672	NNTEGESV
FalsePositive	AKA64451	599	606	0.00819	-2.08672	TSDEGMIE
FalsePositive	ABM54528	792	799	0.00819	-2.08672	VPIEGETT
FalsePositive	AAL37156	852	859	0.00819	-2.08672	HGQQSGAV
FalsePositive	AFO83469	1733	1740	0.00819	-2.08672	EFIQNSKE
FalsePositive	ACK37385	1944	1951	0.00819	-2.08672	IWFQALKA
FalsePositive	ACK37435	2031	2038	0.00819	-2.08672	IAMEGVKY
FalsePositive	AAQ73084	403	410	0.00824	-2.08407	QPQQSGNS
FalsePositive	AFR46521	414	421	0.00824	-2.08407	HGKQSSDV
FalsePositive	AIT57556	569	576	0.00824	-2.08407	HISQSALI
FalsePositive	AAZ73343	608	615	0.00824	-2.08407	ARDENMIE
FalsePositive	ACK37424	657	664	0.00824	-2.08407	PTEEGGNM
FalsePositive	ACK37418	838	845	0.00824	-2.08407	DGSQSIIP
FalsePositive	ANN46831	2148	2155	0.00824	-2.08407	AWHNGEET
FalsePositive	ATG80398	233	240	0.00828	-2.08197	HSVQAAVW
FalsePositive	ACR14890	323	330	0.00828	-2.08197	GARQSNKT
FalsePositive	ABF51197	565	572	0.00828	-2.08197	HMQEGVLE
FalsePositive	ALU66466	591	598	0.00828	-2.08197	PSTQSTAE
FalsePositive	ABM54519	887	894	0.00828	-2.08197	HQNQAVYV
FalsePositive	AUD08527	935	942	0.00828	-2.08197	ITFEGPGL
FalsePositive	ACK37391	298	305	0.00833	-2.07935	CPLEGTPT
FalsePositive	ALB72987	707	714	0.00833	-2.07935	PTGEGVPQ
FalsePositive	ALB72934	759	766	0.00833	-2.07935	AAYQWFYD
FalsePositive	AJO54281	834	841	0.00833	-2.07935	QHREGIKI
FalsePositive	ACK37412	1361	1368	0.00833	-2.07935	PCKEGKVG
FalsePositive	AGC54436	1752	1759	0.00833	-2.07935	HIFEGNKE
FalsePositive	YP_009246449	2151	2158	0.00833	-2.07935	WTREGADI
FalsePositive	ALB73004	226	233	0.00837	-2.07727	STTQSKQT
FalsePositive	ACK37423	230	237	0.00837	-2.07727	RENQSKQP
FalsePositive	AAQ02681	232	239	0.00837	-2.07727	PDTQAPGK
FalsePositive	ACK37433	403	410	0.00837	-2.07727	VERQADLM
FalsePositive	ACK37424	465	472	0.00837	-2.07727	PGTEGPKS
FalsePositive	ABF51183	486	493	0.00837	-2.07727	VGLQSTVV
FalsePositive	ACK37380	526	533	0.00837	-2.07727	LPPQSQQT
FalsePositive	AJO60889	571	578	0.00837	-2.07727	DAIQNTVT
FalsePositive	ABF51198	655	662	0.00837	-2.07727	DTNEGDYD
FalsePositive	APU57649	656	663	0.00837	-2.07727	YNEEGNNF
FalsePositive	AEL31291	2101	2108	0.00837	-2.07727	AWHNGQDV
FalsePositive	AIA58175	2167	2174	0.00837	-2.07727	AWHNGEGE
FalsePositive	AVJ35777	203	210	0.00841	-2.0752	TQEQANFN
FalsePositive	AFD32987	468	475	0.00841	-2.0752	NRMQAMLG
FalsePositive	AVK92956	561	568	0.00841	-2.0752	LHTQSTTI
FalsePositive	AFD32987	575	582	0.00841	-2.0752	SAVQNTTK
FalsePositive	AHY03306	694	701	0.00841	-2.0752	SQDQSTSV
FalsePositive	ALB72947	873	880	0.00841	-2.0752	IGQQSGGI
FalsePositive	AEL31291	1385	1392	0.00841	-2.0752	EESQSRKH
FalsePositive	AGT18270	1500	1507	0.00841	-2.0752	LIMQSVAT
FalsePositive	AKD28015	1755	1762	0.00841	-2.0752	HVFEGYKE
FalsePositive	AFO83469	1761	1768	0.00841	-2.0752	PVFEGNKE
FalsePositive	AFO42819	2145	2152	0.00841	-2.0752	AWHNGEKE
FalsePositive	ADK22846	2166	2173	0.00841	-2.0752	AWHNGAVD
FalsePositive	YP_009246449	142	149	0.00846	-2.07263	AQSNGWYY
FalsePositive	YP_009353025	386	393	0.00846	-2.07263	VTVQAEPD
FalsePositive	ACK37391	557	564	0.00846	-2.07263	LHTQSGNI
FalsePositive	ACK37416	654	661	0.00846	-2.07263	DYNEGNNF
FalsePositive	BAD89965	804	811	0.00846	-2.07263	GSSQSKYP
FalsePositive	AGV98962	1804	1811	0.00846	-2.07263	CVTQAALH
FalsePositive	ABM21518	2166	2173	0.00846	-2.07263	AWHNGEEI
FalsePositive	ALB72977	177	184	0.0085	-2.07058	LHVQSIAS
FalsePositive	AFK29633	488	495	0.0085	-2.07058	IGLQSSYV
FalsePositive	YP_001552411	509	516	0.0085	-2.07058	NYTQAGYV
FalsePositive	AAX47042	586	593	0.0085	-2.07058	STSQNTER
FalsePositive	AMH87228	645	652	0.0085	-2.07058	FQLQSKFK
FalsePositive	ACK37431	797	804	0.0085	-2.07058	TNQQAHEV
FalsePositive	CAE12178	935	942	0.0085	-2.07058	IVFEGPGL
FalsePositive	AUF49637	959	966	0.0085	-2.07058	KRYQSFVL
FalsePositive	AFV92903	1056	1063	0.0085	-2.07058	ETVQSVIT
FalsePositive	ABF51198	1580	1587	0.0085	-2.07058	HNHEGVKL
FalsePositive	ADU34211	103	110	0.00855	-2.06803	AYGQWPEP
FalsePositive	AGA18494	213	220	0.00855	-2.06803	TYKQANPG
FalsePositive	ACK37445	298	305	0.00855	-2.06803	CQLEGTPG
FalsePositive	YP_009353025	371	378	0.00855	-2.06803	NNVEGQVR
FalsePositive	AAR38846	383	390	0.00855	-2.06803	TGQEGINR
FalsePositive	ACK37388	401	408	0.00855	-2.06803	LTRQNTPA
FalsePositive	YP_003358790	582	589	0.00855	-2.06803	LTPQNISA
FalsePositive	AAQ04838	601	608	0.00855	-2.06803	PSTQSTEA
FalsePositive	ABM54549	605	612	0.00855	-2.06803	STAQSTPP
FalsePositive	AJD80554	870	877	0.00855	-2.06803	SGHQSGAV
FalsePositive	AUF49622	918	925	0.00855	-2.06803	LVCQSGAQ
FalsePositive	AQZ26621	1500	1507	0.00855	-2.06803	LAMQSIAT
FalsePositive	AUF49670	2147	2154	0.00855	-2.06803	AWHNGEEE
FalsePositive	AAS86317	103	110	0.0086	-2.0655	AYGQWPET
FalsePositive	ABF51191	386	393	0.0086	-2.0655	NNLEGNIT
FalsePositive	AOX15247	390	397	0.0086	-2.0655	TNMEGTDA
FalsePositive	ABF51198	390	397	0.0086	-2.0655	NNTEGNVK
FalsePositive	ACK37380	463	470	0.0086	-2.0655	PGAEGPTK
FalsePositive	ACT89355	653	660	0.0086	-2.0655	EHGEGVYN
FalsePositive	AAQ73088	806	813	0.0086	-2.0655	KHVQAWVP
FalsePositive	ASZ70601	845	852	0.0086	-2.0655	HTEQAIYR
FalsePositive	AEL31291	932	939	0.0086	-2.0655	GEGQSAPG
FalsePositive	AJF23329	1765	1772	0.0086	-2.0655	HVFEGIKE
FalsePositive	ABU62848	2103	2110	0.0086	-2.0655	AWHNGEEV
FalsePositive	ACK37369	2114	2121	0.0086	-2.0655	CWHNGPEQ
FalsePositive	AAL69631	2147	2154	0.0086	-2.0655	AWHNGEEK
FalsePositive	ASU64358	298	305	0.00864	-2.06349	NFNEGATA
FalsePositive	APT69824	323	330	0.00864	-2.06349	GARQSNKV
FalsePositive	ABF51190	400	407	0.00864	-2.06349	VVLQSTVG
FalsePositive	AQM32742	484	491	0.00864	-2.06349	ATDENMIE
FalsePositive	AAQ73091	562	569	0.00864	-2.06349	FIEQSNKL
FalsePositive	ABO69373	656	663	0.00864	-2.06349	YNDEGNNF
FalsePositive	AAQ73092	740	747	0.00864	-2.06349	FWSEGNAP
FalsePositive	AAQ73081	741	748	0.00864	-2.06349	FWTEGNAS
FalsePositive	AAR38845	806	813	0.00864	-2.06349	KPTQSVTI
FalsePositive	ADB12452	906	913	0.00864	-2.06349	EDLQNAVK
FalsePositive	ACV51798	1536	1543	0.00864	-2.06349	THAQAEDT
FalsePositive	AJO54281	1704	1711	0.00864	-2.06349	LGFQSVNT
FalsePositive	APW91090	233	240	0.00869	-2.06098	NDVQAAAH
FalsePositive	ABF51204	770	777	0.00869	-2.06098	EGDQNTSR
FalsePositive	AMB57008	925	932	0.00869	-2.06098	VSIEGPGL
FalsePositive	ABO69371	957	964	0.00869	-2.06098	GPCQAGDC
FalsePositive	AEL31292	322	329	0.00873	-2.05899	GARQSTKQ
FalsePositive	AAS86318	373	380	0.00873	-2.05899	VEGQSGVA
FalsePositive	QEG13937	373	380	0.00873	-2.05899	NNTEGANG
FalsePositive	AAQ73088	561	568	0.00873	-2.05899	FIEQSADL
FalsePositive	AFQ55938	1050	1057	0.00873	-2.05899	SEIQSTVQ
FalsePositive	ACK37391	1415	1422	0.00873	-2.05899	ISLEGPPP
FalsePositive	ACI23463	1752	1759	0.00873	-2.05899	HVFEGNKE
FalsePositive	AHE93351	390	397	0.00878	-2.05651	ENLQSMDA
FalsePositive	ACK37431	577	584	0.00878	-2.05651	NYVEGVLN
FalsePositive	BAG70420	738	745	0.00878	-2.05651	FWTEGNAA
FalsePositive	ABA43708	835	842	0.00878	-2.05651	YVGQSAAP
FalsePositive	BBD13572	836	843	0.00878	-2.05651	FGHQSGAA
FalsePositive	ACK37401	1443	1450	0.00878	-2.05651	YCEENKWM
FalsePositive	NP_758520	1951	1958	0.00878	-2.05651	LMFQALQM
FalsePositive	AMB19799	2114	2121	0.00878	-2.05651	AWHNGQEK
FalsePositive	ANZ02994	2138	2145	0.00878	-2.05651	AWHNGQEV
FalsePositive	AUF49650	2150	2157	0.00878	-2.05651	AWHNGRQE
FalsePositive	ADU34211	371	378	0.00882	-2.05453	NNVEGEDG
FalsePositive	AEL31291	385	392	0.00882	-2.05453	NNTEGHLG
FalsePositive	ABF51205	386	393	0.00882	-2.05453	NNVEGNEK
FalsePositive	NP_653149	598	605	0.00882	-2.05453	ATSQASVE
FalsePositive	AAQ02681	604	611	0.00882	-2.05453	QDTQSSGP
FalsePositive	AEJ54592	1497	1504	0.00882	-2.05453	LVMQSVAT
FalsePositive	AVK92956	2039	2046	0.00882	-2.05453	IAHEGTKY
FalsePositive	AGC54439	93	100	0.00887	-2.05208	TTQEGANV
FalsePositive	AAW30685	244	251	0.00887	-2.05208	PLSQALIW
FalsePositive	AFD32988	532	539	0.00887	-2.05208	LGAQSNCS
FalsePositive	ADK22846	600	607	0.00887	-2.05208	DTVQNTVA
FalsePositive	ARO77045	657	664	0.00887	-2.05208	PTEEGGKM
FalsePositive	AUF49630	663	670	0.00887	-2.05208	TPRQAAQF
FalsePositive	ACK37440	907	914	0.00887	-2.05208	TNTEGNDV
FalsePositive	BAG70422	981	988	0.00887	-2.05208	MGGEGVVC
FalsePositive	ABV25903	1561	1568	0.00887	-2.05208	QTEEGHFT
FalsePositive	ABK20866	1778	1785	0.00887	-2.05208	HIFEGVKE
FalsePositive	AHK24839	1784	1791	0.00887	-2.05208	TINQAIYG
[truncated: 22,438 more rows]

## Sheet: SF4C. Human sites
Supplemental File 4C. Optimized 3C cleavage motif scores for reported human cleavage sites from Laitinen et al 2016 dataset.
MatchType	sequence_name	p-value	log10_p-val	matched_sequence
HumanSite	RIPK3	3.95e-06	-5.4034	AERQGMNW
HumanSite	TBP	7.17e-05	-4.14448	ASPQGAMT
HumanSite	G3BP1	9.74e-05	-4.01144	AGEQGDIE
HumanSite	UNC93B1	0.000123	-3.91009	AGPQGDED
HumanSite	CSTF2	0.000177	-3.75203	ASMQGGVP
HumanSite	EIF5B	0.000241	-3.61798	VMEQGVPE
HumanSite	PABPC1	0.00038	-3.42022	VHVQGQEP
HumanSite	CREB1	0.000416	-3.38091	AITQGGAI
HumanSite	PCBP2	0.000422	-3.37469	AMQQSHFP
HumanSite	NFKBIA	0.000482	-3.31695	VTYQGYSP
HumanSite	SSB	0.000582	-3.23508	VQFQGKKT
HumanSite	TAB3	0.000617	-3.20971	SAMQGPSP
HumanSite	TAB1	0.000762	-3.11805	MPSQGQMV
HumanSite	PABPC1	0.00103	-2.98716	WTAQGARP
HumanSite	TAB3	0.00135	-2.86967	YQKQGSHS
HumanSite	POU2F1	0.00183	-2.73755	GFTQGDVG
HumanSite	PTK2	0.00198	-2.70333	GSLQGPIG
HumanSite	IRF7	0.00226	-2.64589	AVQQSCLA
HumanSite	MAP3K7	0.00231	-2.63639	AKQQSESG
HumanSite	RELA	0.00293	-2.53313	LLNQGIPV
HumanSite	HNRNPM	0.00321	-2.49349	IAKQGGGG
HumanSite	TAB2	0.00334	-2.47625	GQLQGGQS
HumanSite	NBR1	0.00508	-2.29414	ALPEGPLG
HumanSite	TAB1	0.00555	-2.25571	THTQSSSS
HumanSite	MAVS	0.0121	-1.91721	QETQAPES
HumanSite	PABPC1	0.0627	-1.20273	AIPQTQNR
HumanSite	TICAM1	0.154	-0.812479	FALQTINA
